# Supplementary material for: Enhancement of disease resistance, growth potential, and photosynthesis in tomato (Solanum lycopersicum) by inoculation with an endophytic actinobacterium, Streptomyces thermocarboxydus strain BPSAC147
Source: PubMed Central journal article supplement (PMC6608948; doi:10.1371/journal.pone.0219014), 2019-07-03

**S4 Table. Detection of Volatile Compounds in *Streptomyces thermocarboxydus* isolate BPSAC147**

| Sl. No. | RT    | Compound Name                            | MW  | Molecular structure                                                                   | Function                  | Area % | Reference                   |
|---------|-------|------------------------------------------|-----|---------------------------------------------------------------------------------------|---------------------------|--------|-----------------------------|
| 1       | 1.764 | 1-Buten-3-yne, 2-methyl-                 | 66  |    | -                         | 4.930  | -                           |
| 2       | 1.824 | Methylene chloride                       | 84  |    | Insecticidal              | 3.023  | -                           |
| 3       | 2.004 | Methylene diamine, N,N'-diacetyl-        | 130 |    | Antimicrobial             | 6.043  | Zhao <i>et al.</i> , [1]    |
| 4       | 2.174 | 1H-Pyrazole, 3-methyl-                   | 82  |    | Antimicrobial             | 1.858  | Arslan <i>et al.</i> , [2]  |
| 5       | 2.299 | 4-(2 Aminoethyl)benzenesulfonyl fluoride | 200 |    | Serine protease inhibitor | 1.537  | Jiang <i>et al.</i> , [3]   |
| 6       | 2.334 | 1,5-Hexadiyne                            | 78  |   | Antibacterial             | 1.579  | Peng <i>et al.</i> , [4]    |
| 7       | 2.344 | Benzene                                  | 78  |  | Antimicrobial             | 1.017  | Sohrabi <i>et al.</i> , [5] |
| 8       | 3.009 | Pyridine, 1,2,3,6-tetrahydro-1,2-        | 83  |  | Antimicrobial             | 2.862  | Mohamed <i>et al.</i> ,     |

|    |       |                                                   |     |                                                                                       |                                |       |                                      |     |
|----|-------|---------------------------------------------------|-----|---------------------------------------------------------------------------------------|--------------------------------|-------|--------------------------------------|-----|
|    |       | dimethyl-                                         |     |                                                                                       |                                |       |                                      | [6] |
| 9  | 3.079 | Pilocarpic acid                                   | 208 |    | -                              | 2.671 | -                                    |     |
| 10 | 3.289 | Resorcinol                                        | 110 |    | Antimicrobial                  | 1.229 | Rahangdale, [7]                      |     |
| 11 | 3.549 | 2-n-Butylacrolein                                 | 112 |    | Antimicrobial                  | 1.246 | Sirdaarta <i>et al.</i> ,<br>[8]     |     |
| 12 | 3.97  | Octane, 2-methyl-                                 | 128 |    | -                              | 2.923 | -                                    |     |
| 13 | 4.71  | 3,5-Octadiyne                                     | 106 |    | Antimicrobial<br>& Antioxidant | 2.498 | Oloyede <i>et al.</i> , [9]          |     |
| 14 | 4.995 | Oxirane, hexyl-                                   | 128 |    | Antioxidant<br>activity        | 0.920 | Begum <i>et al.</i> , [10]           |     |
| 15 | 5.02  | Benzeneethanamine, N-[(4-hydroxy) hydrocinnamoyl] | 161 |  | Antimicrobial                  | 0.958 | Harikrishnan <i>et al.</i> ,<br>[11] |     |
| 16 | 5.05  | Benzenepropanoyl bromide                          | 212 |  | -                              | 1.069 | -                                    |     |

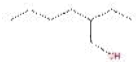

|    |        |                                                                                        |     |  |                                                                |       |                                  |
|----|--------|----------------------------------------------------------------------------------------|-----|--|----------------------------------------------------------------|-------|----------------------------------|
| 17 | 7.881  | 1-Hexanol, 2-ethyl-                                                                    | 130 |  | Antimicrobial and Antioxidant                                  | 3.282 | Zhao <i>et al.</i> , [1]         |
| 18 | 9.347  | Nonane                                                                                 | 128 |  | Antimicrobial                                                  | 0.996 | Morah <i>et al.</i> , [12]       |
| 19 | 12.148 | Benzothiazole                                                                          | 135 |  | Antimicrobial, anticonvulsant, Anti-inflammatory and antiviral | 2.805 | Ali and Siddiqui, [13]           |
| 20 | 15.244 | Cedrene                                                                                | 204 |  | Antibacterial and repellent                                    | 0.894 | Taran <i>et al.</i> , [14]       |
| 21 | 15.494 | 7-epi-trans-sesquisabinene hydrate                                                     | 222 |  | Antimicrobial                                                  | 1.122 | Hussein <i>et al.</i> , [15]     |
| 22 | 15.644 | 1H-3a,7-Methanoazulene, octahydro-3,8,8-trimethyl-6-methylene-, [3R-(3à,3aá,7á,8aà)] - | 218 |  | Antimicrobial                                                  | 2.358 | Saravanakumar and Gayathri, [16] |

|    |        |                                                                                          |     |                                                                                      |                               |        |                                  |
|----|--------|------------------------------------------------------------------------------------------|-----|--------------------------------------------------------------------------------------|-------------------------------|--------|----------------------------------|
| 23 | 16.094 | 4,7-Methanoazulene,<br>1,2,3,4,5,6,7,8-octahydro-1,4,9,9-tetramethyl-, [1S-(1à,4à,7à)] - | 204 | 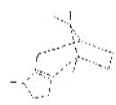  | -                             | 1.651  | -                                |
| 24 | 16.304 | tert-Hexadecanethiol                                                                     | 258 |    | Antimicrobial                 | 2.110  | Parasuraman <i>et al.</i> , [17] |
| 25 | 16.304 | 2-Piperidinone, N-[4-bromo-n-butyl]-                                                     | 233 |     | Antimicrobial and antioxidant | 2.110  | Arslan <i>et al.</i> , [2]       |
| 26 | 16.435 | Decahydro-1,1,4a,5,6-pentamethylnaphthalene                                              | 208 |    | Antimicrobial                 | 3.370  | Peng <i>et al.</i> , [4]         |
| 27 | 16.78  | (E)-á-Famesene                                                                           | 204 |  | -                             | 2.582  | -                                |
| 28 | 16.895 | 2,6,10-Dodecatrien-1-ol, 3,7,11-trimethyl-                                               | 280 |   | Antimicrobial                 | 17.959 | Liu <i>et al.</i> , [18]         |
| 29 | 18.395 | Dodecane, 5,8-diethyl-                                                                   | 226 |   | Antifungal and antibacterial  | 3.102  | Guo <i>et al.</i> , [19]         |
| 30 | 19.156 | N-Isobutylundeca-2(E)-en-8,10-diynamide                                                  | 231 |   | Antioxidants                  | 1.452  | Maimulyanti and Prihadi, [20]    |

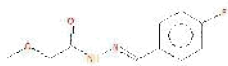

|    |        |                                        |     |                               |       |                             |
|----|--------|----------------------------------------|-----|-------------------------------|-------|-----------------------------|
| 31 | 19.181 | Methoxyacetic acid, 4-tetradecyl ester | 210 | Antimicrobial                 | 0.905 | Sohrabi <i>et al.</i> , [5] |
| 32 | 20.041 | Ethanol, 2-(tetradecyloxy)-            | 258 | -                             | 1.069 | -                           |
| 33 | 20.211 | Copaene                                | 204 | Antioxidant and Antimicrobial | 2.681 | Phukan <i>et al.</i> , [21] |
| 34 | 21.467 | Pentadecane, 2,6,10,14-tetramethyl-    | 268 | Antimicrobial and antioxidant | 3.193 | Zhao <i>et al.</i> , [1]    |
| 35 | 22.577 | 4-(4'-Hydroxyphenoxy)biphenyl          | 262 | -                             | 4.650 | -                           |

## References

1. Zhao J, Jiang L, Tang X, Peng L, Li X, Zhao G, et al. Chemical Composition, Antimicrobial and Antioxidant Activities of the Flower Volatile Oils of *Fagopyrum esculentum*, *Fagopyrum tataricum* and *Fagopyrum Cymosum*. *Molecules*. 2018; 23(1): 182.
2. Arslan S, Loğoğlu E, Öktemer A. Antimicrobial activity studies on some piperidine and pyrrolidine substituted halogenobenzene derivatives. *J Enzyme Inhib Med Chem*. 2006; 21(2): 211-214.

3. Jiang YH, Shi Y, He YP, Du J, Li RS, Shi HJ, et al. Serine protease inhibitor 4-(2-aminoethyl) benzenesulfonyl fluoride hydrochloride (AEBSF) inhibits the rat embryo implantation in vivo and interferes with cell adhesion in vitro. *Contraception*. 2011;84(6):642-648.
4. Peng W, Lin Z, Wang L, Chang J, Gu F, Zhu X. Molecular characteristics of *Illicium verum* extractives to activate acquired immune response. *Sau J Biol Sci*. 2016; 23(3): 348-352.
5. Sohrabi M, Zhang L, Zhang K, Ahmetagic A, Wei MQ. Volatile organic compounds as novel markers for the detection of bacterial infections. *Clin Microbiol: Open Acc*. 2014; 3(3): 151.
6. Mohamed HM, EL-Wahab AHA, EL-Agrody AM, Bedair AH, Eid FA, Khafagy MM, et al. Synthesis and characterization of new diiodocoumarin derivatives with promising antimicrobial activities. *Beilstein J Org Chem*. 2011;7:1688.
7. Rahangdale SS. Synthesis, characterization and antimicrobial activity of resorcinol-melamine-formaldehyde resin. *J Chem Pharm Res*. 2012; 4(10):4451-4458.
8. Sirdarta J, Matthews B, White A, Cock IE. GC-MS and LC-MS analysis of Kakadu plum fruit extracts displaying inhibitory activity against microbial triggers of multiple sclerosis. *Pharmacog Commun*. 2015; 5(2).
9. Oloyede GK. Toxicity, antimicrobial and antioxidant activities of methyl salicylate dominated essential oils of *Laportea aestuans* (Gaud). *Arab J Chem*. 2016; 9: S840-S845.
10. Begum I, Faridha R, Mohankumar M, Ramani K. "GC-MS Analysis of Bio-active Molecules Derived from *Paracoccus pantotrophus* FMR19 and the Antimicrobial Activity Against Bacterial Pathogens and MDROs." *Ind J Microbiol*. 2016; 56: 426-432.
11. Harikrishnan R, Kim MC, Kim JS, Balasundaram C, Jawahar S, Heo MS. Identification and antimicrobial activity of combined extract from *Azadirachta indica* and *Ocimum sanctum*. *Isr J Aquacult = Bamid*. 2010; 62(2):85-95.
12. Morah FN, Emehige EP, Mowang MM. Chemical composition and antimicrobial activity of *Nauclea latifolia* leaf essential oil. *Int J Chem Biochem Sci*. 2017; 11: 44-50.
13. Ali R, Siddiqui N. Biological Aspects of Emerging Benzothiazole: A Short Review. *J Chem*. 2013;2013.

14. Taran M, Ghasempour HR, Shirinpour E. Antimicrobial activity of essential oils of *Ferulago angulata* subsp. *carduchorum*. Jundishapur J Microbiol. 2010; 3(2): 10-14.
15. Hussein HM, Hameed IH, Ibraheem OA. Antimicrobial Activity and spectral chemical analysis of methanolic leaves extract of *Adiantum capillus-veneris* using GC-MS and FT-IR spectroscopy. Int J Pharmacog Phytochem Res. 2016; 8(3): 369-385.
16. Saravanakumar S, Gayathri K. Chemical characterization of *Vetiveria Zizanioides* Linn root. Int J Pharm Bio Sci. 2016; 7(4): 689-695.
17. Parasuraman S, Ren LY, Chuon BLC, Yee SWK, Qi TS, Ching JYS, et al. Phytochemical, antimicrobial and mast cell stabilizing activity of ethanolic extract of *Solanum trilobatum* Linn. leaves. Malays J Microbiol. 2016; 12(5):359-364.
18. Liu RH, Shen CJ, Wu HJ, Deng CJ, Liu SY. Characterisation of bio-oil from fast pyrolysis of rice husk in a fluidised bed reactor. J Energy Inst. 2011; 84: 73.
19. Guo L, Wu JZ, Han T, Cao T, Rahman K, Qin LP. Chemical composition, antifungal and antitumor properties of ether extracts of *Scapania verrucosa* Heeg. and its endophytic fungus *Chaetomium fusiforme*. Molecules. 2008; 13(9): 2114-2125.
20. Maimulyanti A, Prihadi AR. Chemical composition of essential oil and hexane extract and antioxidant activity of various extracts of *Acmella uliginosa* (Sw.) Cass flowers from Indonesia. Agric Nat Res. 2016; 50(4): 264-269.
21. Phukan H, Bora CR, Mitra PK. Phytochemical Screening and GC-MS Analysis of Methanolic leaf Extract of an Endemic Plant *Kayea assamica*. IOSR J Pharma Biol Sci. 2017; 12(5): 07-16.

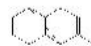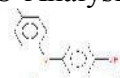

Supplement: pone.0219014.s004.pdf [file pone.0219014.s004.pdf]
