# Supplementary material for: Enhancement of disease resistance, growth potential, and photosynthesis in tomato (Solanum lycopersicum) by inoculation with an endophytic actinobacterium, Streptomyces thermocarboxydus strain BPSAC147
Source: PubMed Central journal article supplement (PMC6608948; doi:10.1371/journal.pone.0219014), 2019-07-03

# TAMILNADU AGRICULTURAL UNIVERSITY - AGRICULTURAL MICROBIOLOGY

INSTRUMENT: PERKIN ELMER CLARUS SQ8C  
 INJECTION VOL: 1 MICRO LITER  
 SAMPLE ID : C160

COLOUMN: DB-5 MS CAPILARY STANDARD NON - POLARCOLOUMN  
 DIMENSION: 30Mts, ID: 0.25 mm, FILM: 0.25 IM CARRIER GAS: He

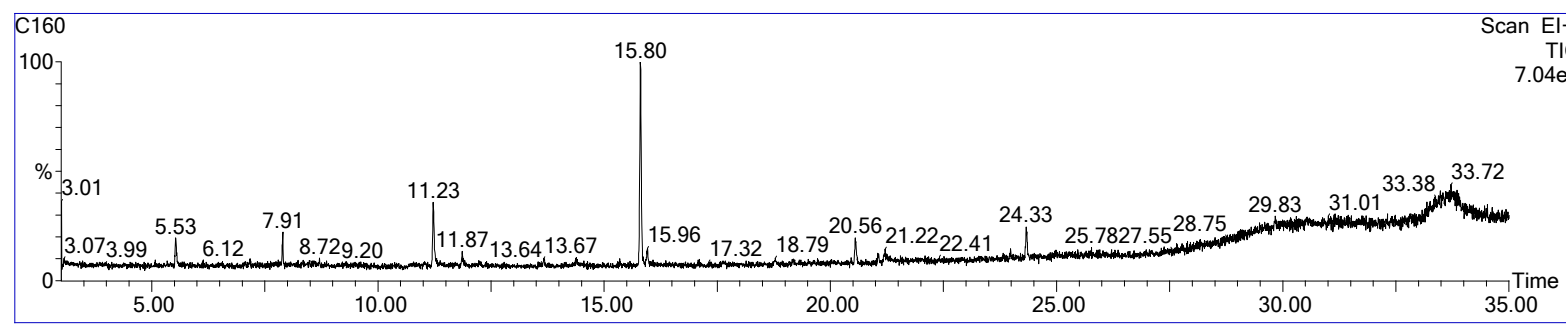

| # | RT    | Scan | Height    | Area      | Area % | Norm % |
|---|-------|------|-----------|-----------|--------|--------|
| 1 | 5.534 | 507  | 9,493,158 | 391,403.0 | 0.819  | 14.96  |

| PK # | RT    | Hit | Compound Name                       | Match | R.Match | Prob. | CAS        | Library |
|------|-------|-----|-------------------------------------|-------|---------|-------|------------|---------|
| 1    | 5.534 | 1   | Benzaldehyde, 2-methyl-             | 724   | 861     | 17.8  | 529-20-4   | mainlib |
|      |       | 2   | Benzaldehyde, 3-methyl-             | 717   | 851     | 13.6  | 620-23-5   | replib  |
|      |       | 3   | Benzaldehyde, 4-methyl-             | 712   | 846     | 11.0  | 104-87-0   | mainlib |
|      |       | 4   | Benzaldehyde, 3-methyl-             | 711   | 844     | 13.6  | 620-23-5   | mainlib |
|      |       | 5   | Benzaldehyde, 4-methyl-             | 710   | 848     | 11.0  | 104-87-0   | replib  |
|      |       | 6   | Bicyclo[4.2.0]octa-1,3,5-trien-7-ol | 708   | 847     | 9.3   | 35447-99-5 | mainlib |
|      |       | 7   | Benzaldehyde, 2-methyl-             | 706   | 835     | 17.8  | 529-20-4   | replib  |
|      |       | 8   | Benzaldehyde, 4-methyl-             | 703   | 841     | 11.0  | 104-87-0   | replib  |
|      |       | 9   | Benzaldehyde, 4-methyl-             | 702   | 838     | 11.0  | 104-87-0   | replib  |
|      |       | 10  | Benzaldehyde, 4-methyl-             | 700   | 849     | 11.0  | 104-87-0   | replib  |

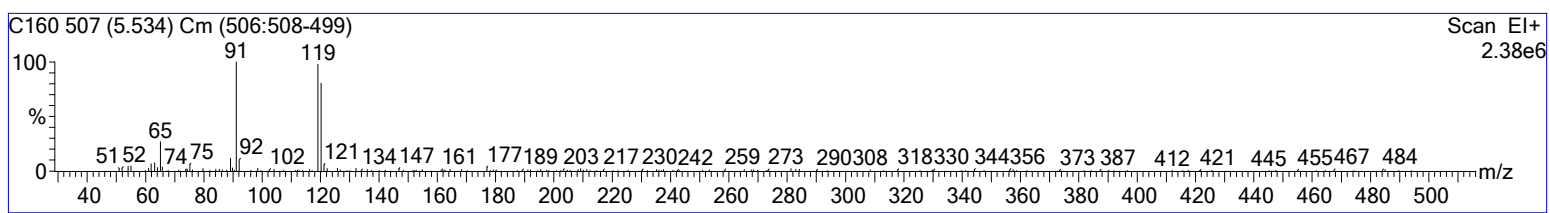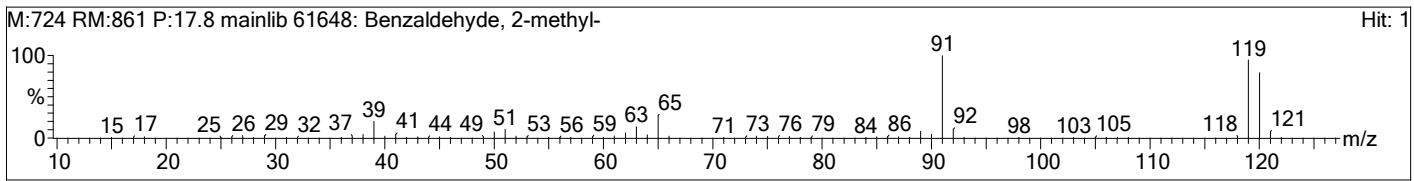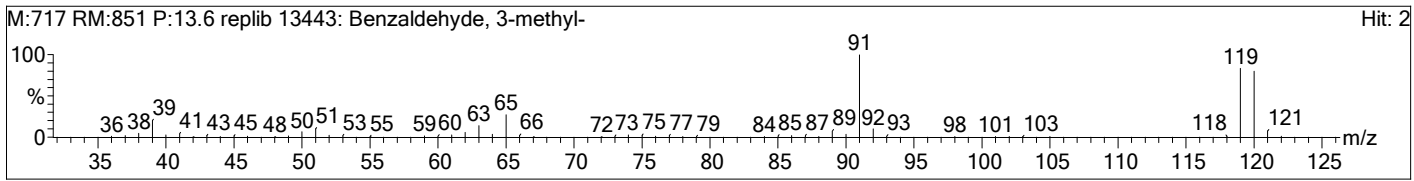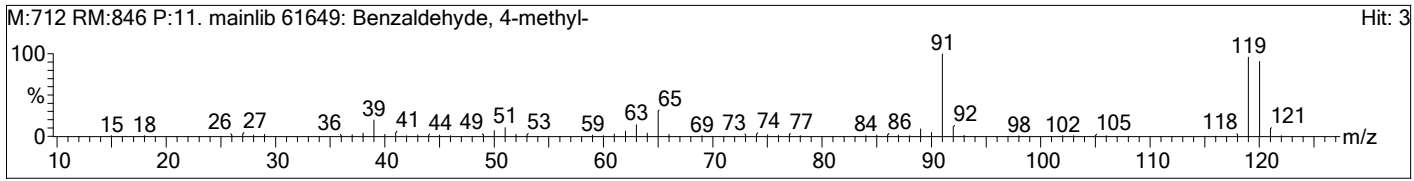

# TAMILNADU AGRICULTURAL UNIVERSITY - AGRICULTURAL MICROBIOLOGY

INSTRUMENT: PERKIN ELMER CLARUS SQ8C  
 INJECTION VOL: 1 MICRO LITER  
 SAMPLE ID : C160

COLOUMN: DB-5 MS CAPILARY STANDARD NON - POLARCOLOUMN  
 DIMENSION: 30Mts, ID: 0.25 mm, FILM: 0.25 IM CARRIER GAS: He

| # | RT    | Scan | Height     | Area      | Area % | Norm % |
|---|-------|------|------------|-----------|--------|--------|
| 2 | 7.905 | 981  | 11,602,610 | 317,636.8 | 0.665  | 12.14  |

| PK # | RT    | Hit | Compound Name                                 | Match | R.Match | Prob. | CAS        | Library |
|------|-------|-----|-----------------------------------------------|-------|---------|-------|------------|---------|
| 2    | 7.905 | 1   | Benzene, 1,3-bis(1,1-dimethylethyl)-          | 680   | 814     | 37.5  | 1014-60-4  | replib  |
|      |       | 2   | Benzene, 1,3-bis(1,1-dimethylethyl)-          | 663   | 796     | 37.5  | 1014-60-4  | replib  |
|      |       | 3   | Benzene, 1,3-bis(1,1-dimethylethyl)-          | 657   | 796     | 37.5  | 1014-60-4  | mainlib |
|      |       | 4   | Benzene, 1,4-bis(1,1-dimethylethyl)-          | 657   | 784     | 13.7  | 1012-72-2  | replib  |
|      |       | 5   | Benzene, 1,4-bis(1,1-dimethylethyl)-          | 652   | 772     | 13.7  | 1012-72-2  | mainlib |
|      |       | 6   | Benzo[c]furanone, 3,3,4,7-tetramethyl-        | 648   | 759     | 9.9   | 37740-08-2 | mainlib |
|      |       | 7   | m-Cymene, 5-tert-butyl-                       | 637   | 748     | 6.8   | 29577-19-3 | mainlib |
|      |       | 8   | Benzene, 1,4-dimethyl-2,5-bis(1-methylethyl)- | 632   | 731     | 5.5   | 10375-96-9 | replib  |
|      |       | 9   | Benzene, 1,5-dimethyl-2,4-bis(1-methylethyl)- | 629   | 760     | 4.9   | 5186-68-5  | mainlib |
|      |       | 10  | Benzene, 1,4-dimethyl-2,5-bis(1-methylethyl)- | 625   | 734     | 5.5   | 10375-96-9 | replib  |

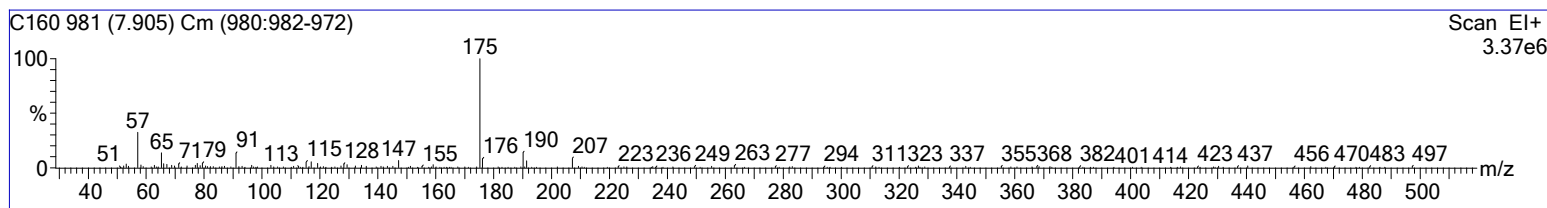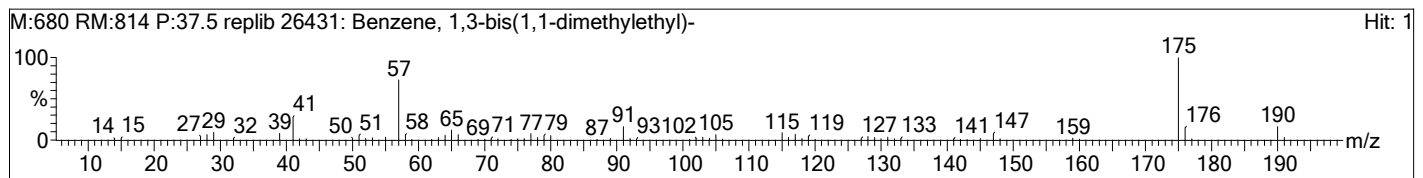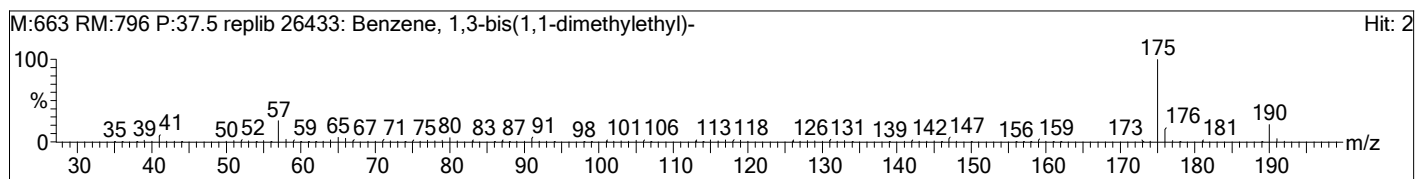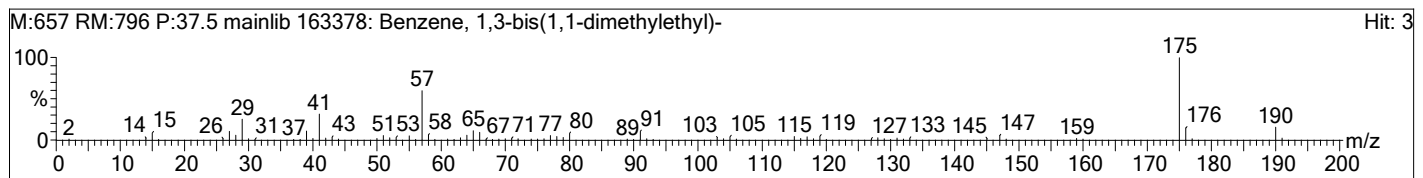

# TAMILNADU AGRICULTURAL UNIVERSITY - AGRICULTURAL MICROBIOLOGY

INSTRUMENT: PERKIN ELMER CLARUS SQ8C  
 INJECTION VOL: 1 MICRO LITER  
 SAMPLE ID : C160

COLOUMN: DB-5 MS CAPILARY STANDARD NON - POLARCOLOUMN  
 DIMENSION: 30Mts, ID: 0.25 mm, FILM: 0.25 IM CARRIER GAS: He

| # | RT     | Scan | Height     | Area      | Area % | Norm % |
|---|--------|------|------------|-----------|--------|--------|
| 3 | 11.227 | 1645 | 20,994,868 | 905,327.2 | 1.894  | 34.61  |

| Pk # | RT     | Hit | Compound Name            | Match | R.Match | Prob. | CAS        | Library |
|------|--------|-----|--------------------------|-------|---------|-------|------------|---------|
| 3    | 11.227 | 1   | 1-Dodecanol              | 740   | 862     | 7.0   | 112-53-8   | replib  |
|      |        | 2   | 1-Undecanol              | 732   | 875     | 5.2   | 112-42-5   | mainlib |
|      |        | 3   | 1-Hexadecanol            | 730   | 844     | 4.8   | 36653-82-4 | mainlib |
|      |        | 4   | 1-Pentadecene            | 727   | 841     | 4.2   | 13360-61-7 | replib  |
|      |        | 5   | n-Tridecan-1-ol          | 722   | 832     | 3.4   | 112-70-9   | replib  |
|      |        | 6   | Cyclotetradecane         | 721   | 835     | 3.3   | 295-17-0   | mainlib |
|      |        | 7   | Hexadecen-1-ol, trans-9- | 721   | 835     | 3.3   | 64437-47-4 | mainlib |
|      |        | 8   | Cyclopentadecane         | 721   | 833     | 3.3   | 295-48-7   | replib  |
|      |        | 9   | n-Tridecan-1-ol          | 719   | 814     | 3.4   | 112-70-9   | replib  |
|      |        | 10  | Cyclotridecane           | 718   | 844     | 2.9   | 295-02-3   | mainlib |

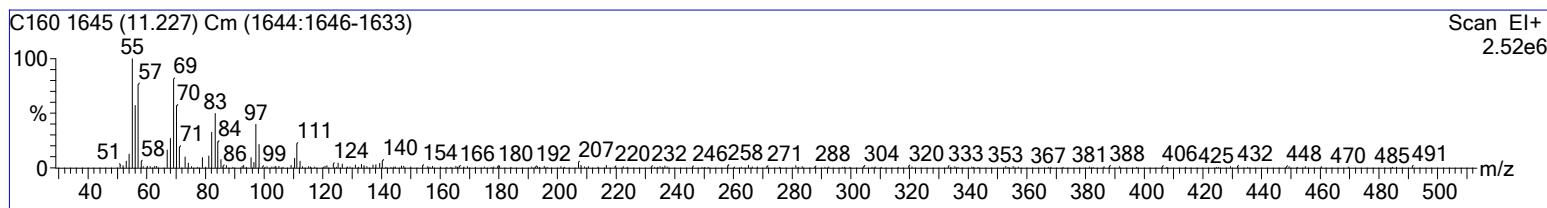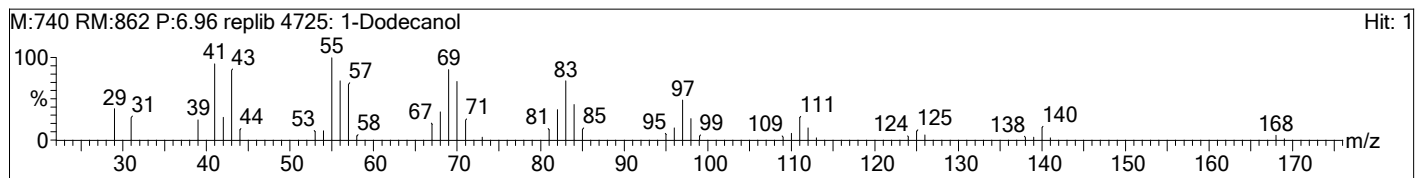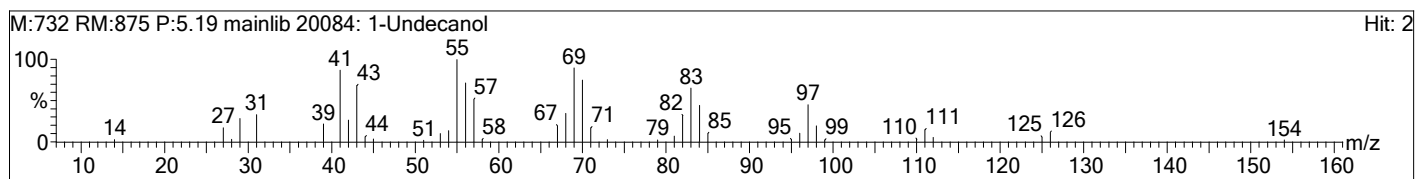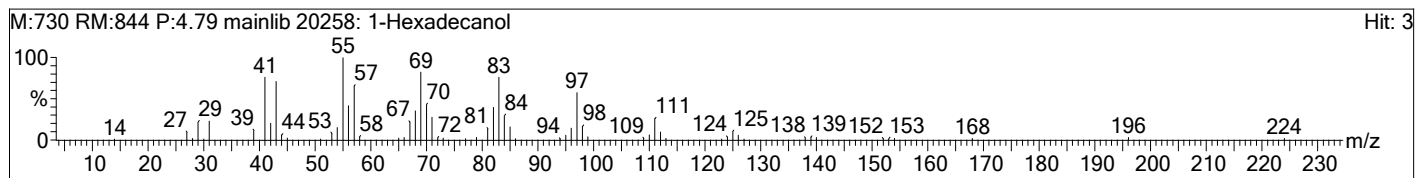

# TAMILNADU AGRICULTURAL UNIVERSITY - AGRICULTURAL MICROBIOLOGY

INSTRUMENT: PERKIN ELMER CLARUS SQ8C  
 INJECTION VOL: 1 MICRO LITER  
 SAMPLE ID : C160

COLOUMN: DB-5 MS CAPILARY STANDARD NON - POLARCOLOUMN  
 DIMENSION: 30Mts, ID: 0.25 mm, FILM: 0.25 IM CARRIER GAS: He

| # | RT     | Scan | Height    | Area      | Area % | Norm % |
|---|--------|------|-----------|-----------|--------|--------|
| 4 | 11.867 | 1773 | 5,417,990 | 237,810.4 | 0.498  | 9.09   |

| Pk # | RT     | Hit | Compound Name                       | Match | R.Match | Prob. | CAS       | Library |
|------|--------|-----|-------------------------------------|-------|---------|-------|-----------|---------|
| 4    | 11.867 | 1   | 2,4-Di-tert-butylphenol             | 569   | 718     | 28.7  | 96-76-4   | replib  |
|      |        | 2   | Phenol, 3,5-bis(1,1-dimethylethyl)- | 561   | 719     | 21.4  | 1138-52-9 | replib  |
|      |        | 3   | 2,4-Di-tert-butylphenol             | 555   | 728     | 28.7  | 96-76-4   | mainlib |
|      |        | 4   | 2,4-Di-tert-butylphenol             | 550   | 756     | 28.7  | 96-76-4   | replib  |
|      |        | 5   | Phenol, 2,6-bis(1,1-dimethylethyl)- | 548   | 692     | 13.8  | 128-39-2  | replib  |
|      |        | 6   | Phenol, 3,5-bis(1,1-dimethylethyl)- | 545   | 740     | 21.4  | 1138-52-9 | replib  |
|      |        | 7   | Phenol, 3,5-bis(1,1-dimethylethyl)- | 543   | 723     | 21.4  | 1138-52-9 | replib  |
|      |        | 8   | Phenol, 2,5-bis(1,1-dimethylethyl)- | 541   | 710     | 10.6  | 5875-45-6 | mainlib |
|      |        | 9   | Phenol, 2,5-bis(1,1-dimethylethyl)- | 541   | 694     | 10.6  | 5875-45-6 | replib  |
|      |        | 10  | Phenol, 2,6-bis(1,1-dimethylethyl)- | 528   | 685     | 13.8  | 128-39-2  | replib  |

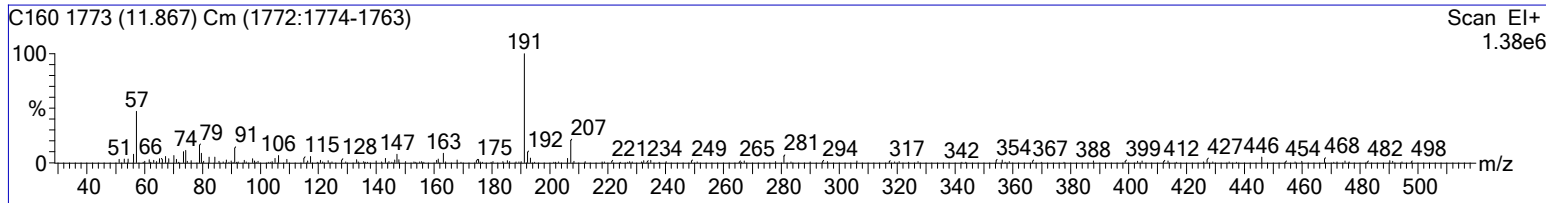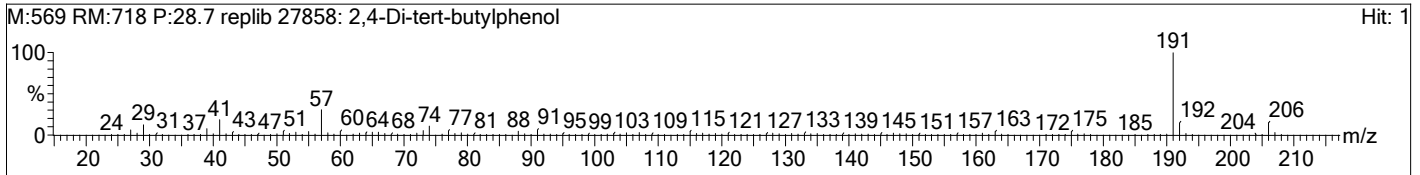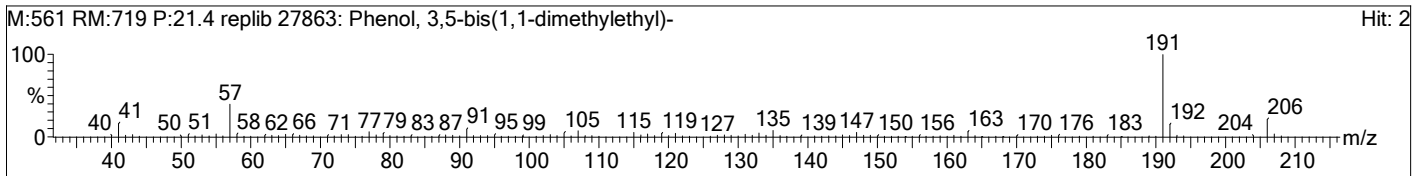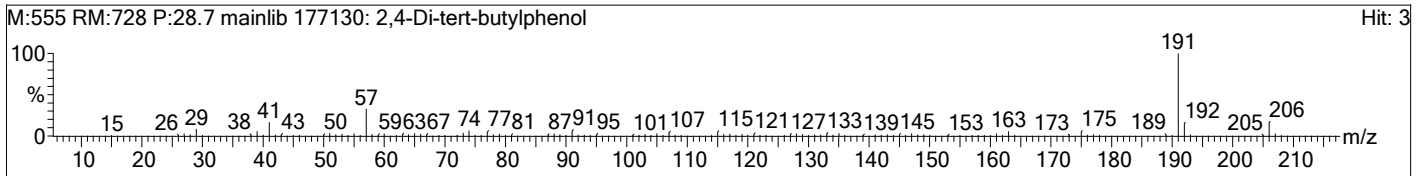

# TAMILNADU AGRICULTURAL UNIVERSITY - AGRICULTURAL MICROBIOLOGY

INSTRUMENT: PERKIN ELMER CLARUS SQ8C  
 INJECTION VOL: 1 MICRO LITER  
 SAMPLE ID : C160

COLOUMN: DB-5 MS CAPILARY STANDARD NON - POLARCOLOUMN  
 DIMENSION: 30Mts, ID: 0.25 mm, FILM: 0.25 IM CARRIER GAS: He

| # | RT     | Scan | Height     | Area        | Area % | Norm % |
|---|--------|------|------------|-------------|--------|--------|
| 5 | 15.804 | 2560 | 65,737,824 | 2,616,165.8 | 5.473  | 100.00 |

| Pk # | RT     | Hit | Compound Name                      | Match | R.Match | Prob. | CAS        | Library |
|------|--------|-----|------------------------------------|-------|---------|-------|------------|---------|
| 5    | 15.804 | 1   | Dodecyl acrylate                   | 873   | 902     | 48.5  | 2156-97-0  | replib  |
|      |        | 2   | Dodecyl acrylate                   | 870   | 904     | 48.5  | 2156-97-0  | replib  |
|      |        | 3   | Dodecyl acrylate                   | 792   | 820     | 48.5  | 2156-97-0  | mainlib |
|      |        | 4   | 2-Propenoic acid, tridecyl ester   | 791   | 821     | 4.9   | 3076-04-8  | mainlib |
|      |        | 5   | 1-Dodecanol                        | 783   | 836     | 3.7   | 112-53-8   | replib  |
|      |        | 6   | 2-Propenoic acid, pentadecyl ester | 775   | 802     | 2.8   | 43080-23-5 | mainlib |
|      |        | 7   | Ethylene diacrylate                | 762   | 795     | 1.8   | 2274-11-5  | mainlib |
|      |        | 8   | 1-Tetradecanol                     | 761   | 777     | 1.7   | 112-72-1   | replib  |
|      |        | 9   | 1-Undecanol                        | 758   | 852     | 1.5   | 112-42-5   | mainlib |
|      |        | 10  | 1-Dodecanol                        | 757   | 805     | 3.7   | 112-53-8   | replib  |

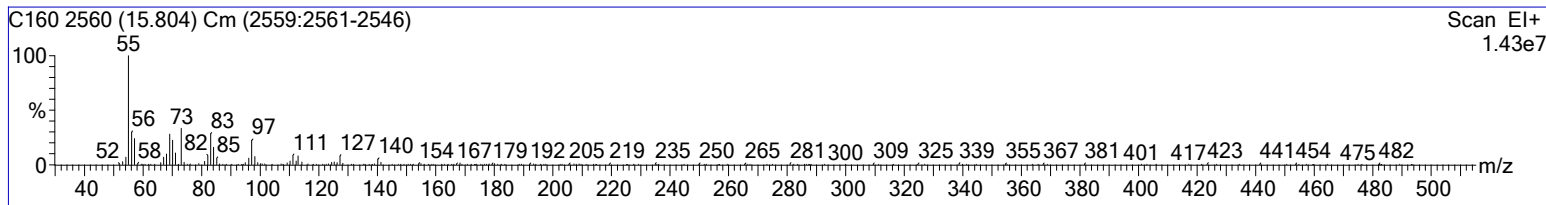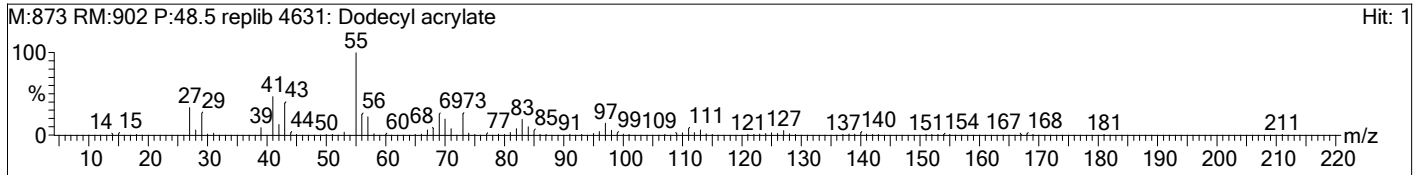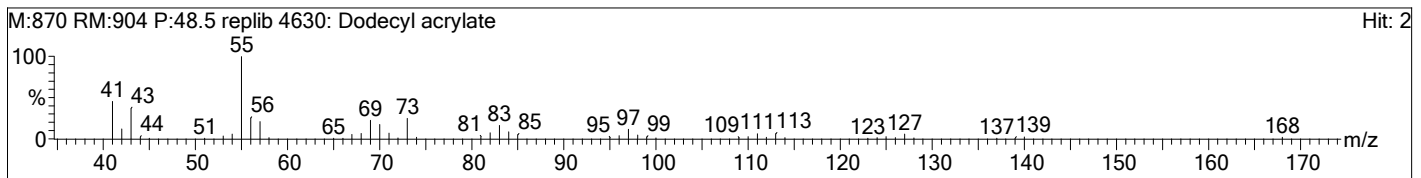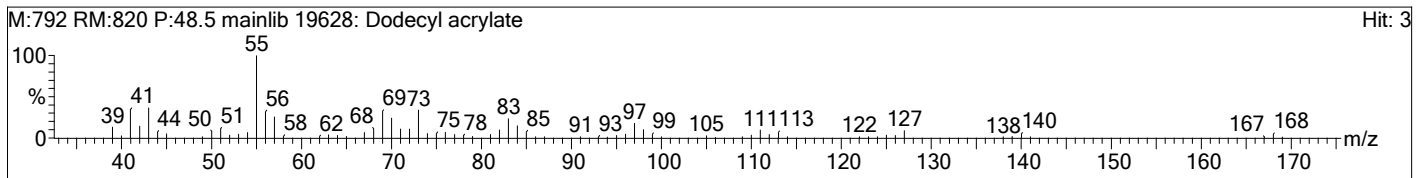

# TAMILNADU AGRICULTURAL UNIVERSITY - AGRICULTURAL MICROBIOLOGY

INSTRUMENT: PERKIN ELMER CLARUS SQ8C  
 INJECTION VOL: 1 MICRO LITER  
 SAMPLE ID : C160

COLOUMN: DB-5 MS CAPILARY STANDARD NON - POLARCOLOUMN  
 DIMENSION: 30Mts, ID: 0.25 mm, FILM: 0.25 IM CARRIER GAS: He

| # | RT     | Scan | Height    | Area      | Area % | Norm % |
|---|--------|------|-----------|-----------|--------|--------|
| 6 | 15.964 | 2592 | 5,955,808 | 261,784.0 | 0.548  | 10.01  |

| Pk # | RT     | Hit | Compound Name                             | Match | R.Match | Prob. | CAS        | Library |
|------|--------|-----|-------------------------------------------|-------|---------|-------|------------|---------|
| 6    | 15.964 | 1   | Hexadecane, 1,1-bis(dodecyloxy)-          | 486   | 557     | 5.3   | 56554-64-4 | mainlib |
|      |        | 2   | 5-Octadecenal                             | 479   | 556     | 4.1   | 56554-88-2 | mainlib |
|      |        | 3   | 17-Pentatriacontene                       | 476   | 575     | 3.6   | 6971-40-0  | replib  |
|      |        | 4   | 17-Pentatriacontene                       | 472   | 501     | 3.6   | 6971-40-0  | mainlib |
|      |        | 5   | Vinyl lauryl ether                        | 470   | 737     | 2.8   | 765-14-0   | mainlib |
|      |        | 6   | Tetrapentacontane, 1,54-dibromo-          | 469   | 538     | 2.7   |            | mainlib |
|      |        | 7   | Z-10-Methyl-11-tetradecen-1-ol propionate | 468   | 549     | 2.6   |            | mainlib |
|      |        | 8   | Oleic Acid                                | 466   | 535     | 2.4   | 112-80-1   | replib  |
|      |        | 9   | cis-11-Eicosenoic acid                    | 465   | 524     | 2.3   | 5561-99-9  | mainlib |
|      |        | 10  | 1-Tricosanol                              | 463   | 520     | 2.1   | 3133-01-5  | replib  |

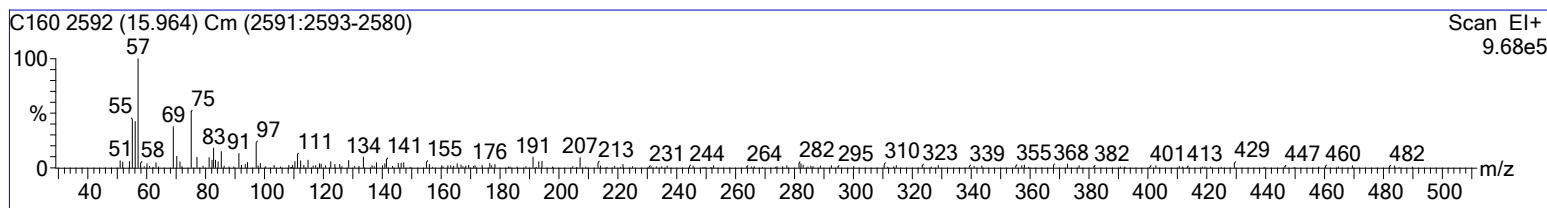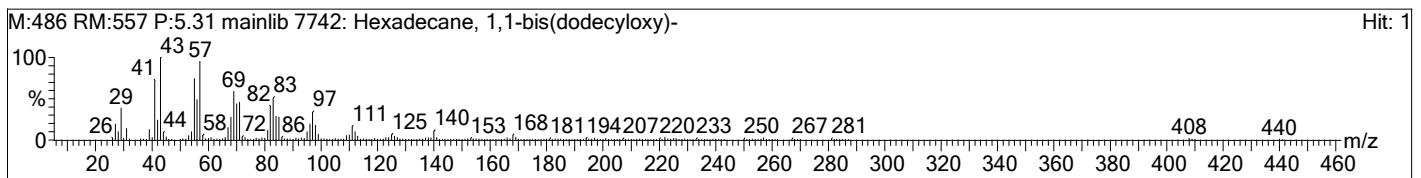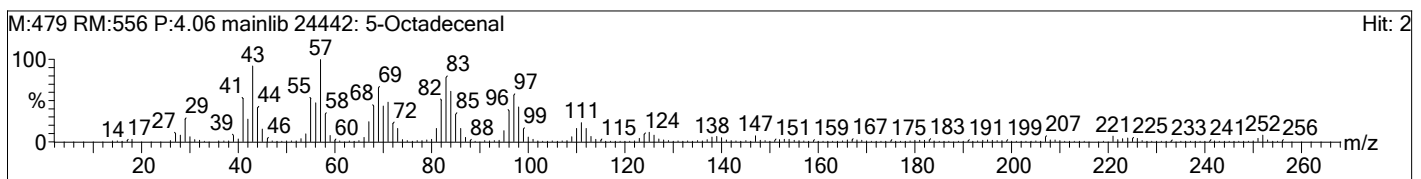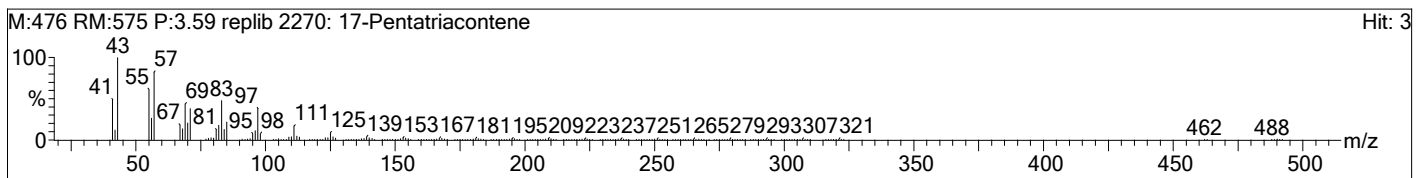

# TAMILNADU AGRICULTURAL UNIVERSITY - AGRICULTURAL MICROBIOLOGY

INSTRUMENT: PERKIN ELMER CLARUS SQ8C  
 INJECTION VOL: 1 MICRO LITER  
 SAMPLE ID : C160

COLOUMN: DB-5 MS CAPILARY STANDARD NON - POLARCOLOUMN  
 DIMENSION: 30Mts, ID: 0.25 mm, FILM: 0.25 IM CARRIER GAS: He

| # | RT     | Scan | Height    | Area      | Area % | Norm % |
|---|--------|------|-----------|-----------|--------|--------|
| 7 | 17.634 | 2926 | 2,179,672 | 187,130.9 | 0.392  | 7.15   |

| Pk # | RT     | Hit | Compound Name                                                                                      | Match | R.Match | Prob. | CAS        | Library |
|------|--------|-----|----------------------------------------------------------------------------------------------------|-------|---------|-------|------------|---------|
| 7    | 17.634 | 1   | Octasiloxane, 1,1,3,3,5,5,7,7,9,9,11,11,13,13,15,15-hexadecamethyl-                                | 364   | 522     | 11.3  | 19095-24-0 | mainlib |
|      |        | 2   | 2,4-Imidazolidinedione, 5-[3,4-bis(trimethylsilyloxy)phenyl]-3-methyl-5-phenyl-1-(trimethylsilyl)- | 362   | 384     | 10.4  | 55517-85-6 | mainlib |
|      |        | 3   | Heptasiloxane, 1,1,3,3,5,5,7,7,9,9,11,11,13,13-tetradecamethyl-                                    | 358   | 520     | 8.8   | 19095-23-9 | mainlib |
|      |        | 4   | 17-(1,5-Dimethylhexyl)-10,13-dimethyl-3-styrylhexadecahydrocyclopenta[a]phenanthren-2-one          | 352   | 372     | 6.9   |            | mainlib |
|      |        | 5   | Morphine, 2TMS derivative                                                                          | 340   | 396     | 4.6   | 55449-66-6 | replib  |
|      |        | 6   | (+)-Prostaglandin F2à, 4TMS derivative                                                             | 338   | 374     | 4.2   | 50669-95-9 | mainlib |
|      |        | 7   | Morphine, 2TMS derivative                                                                          | 337   | 358     | 4.6   | 55449-66-6 | replib  |
|      |        | 8   | Hexasiloxane, 1,1,3,3,5,5,7,7,9,9,11,11-dodecamethyl-                                              | 329   | 451     | 3.1   | 995-82-4   | mainlib |
|      |        | 9   | Morphine, bis(trimethylsilyl) ether                                                                | 326   | 345     | 2.7   |            | mainlib |
|      |        | 10  | Pregn-4-en-3-one, 11,17,20,21-tetrakis(trimethylsilyloxy)-, O-methyloxime, (11à, 20S)-             | 323   | 366     | 2.4   | 57325-93-6 | mainlib |

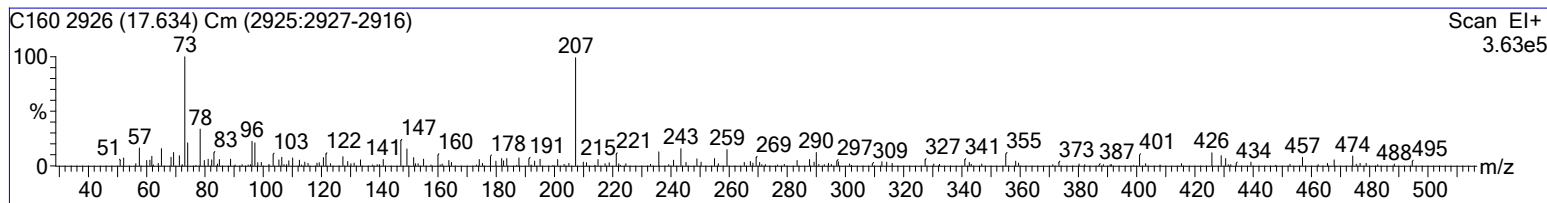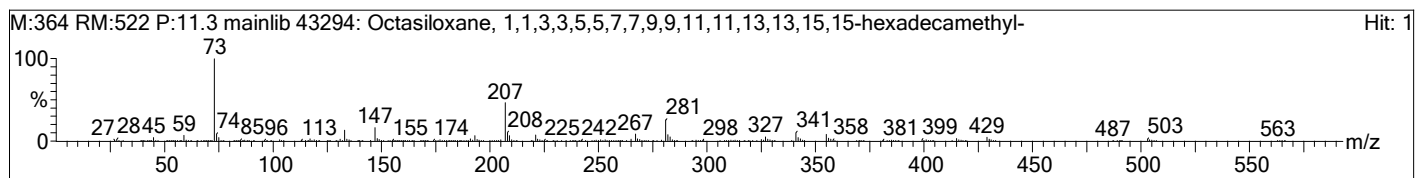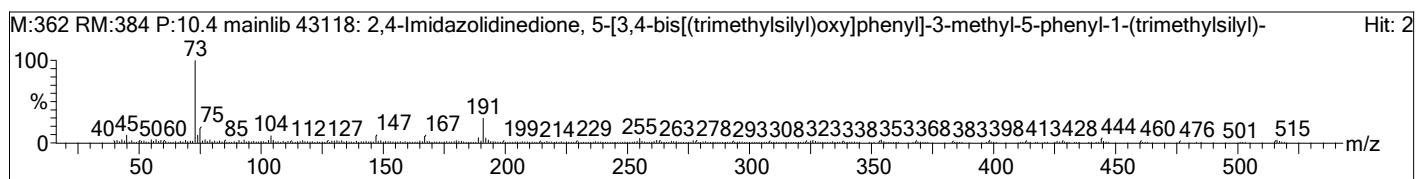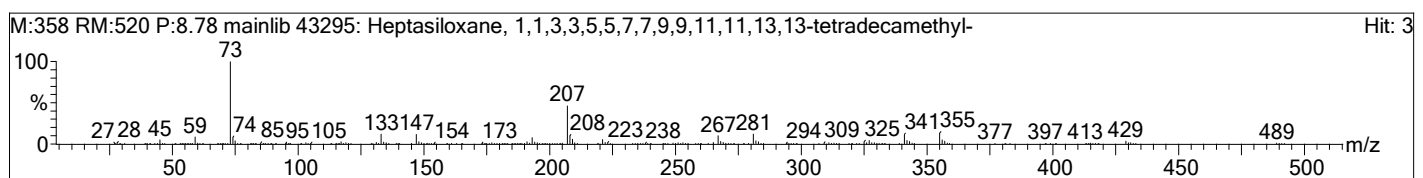

# TAMILNADU AGRICULTURAL UNIVERSITY - AGRICULTURAL MICROBIOLOGY

INSTRUMENT: PERKIN ELMER CLARUS SQ8C  
 INJECTION VOL: 1 MICRO LITER  
 SAMPLE ID : C160

COLOUMN: DB-5 MS CAPILARY STANDARD NON - POLARCOLOUMN  
 DIMENSION: 30Mts, ID: 0.25 mm, FILM: 0.25 IM CARRIER GAS: He

| # | RT     | Scan | Height    | Area      | Area % | Norm % |
|---|--------|------|-----------|-----------|--------|--------|
| 8 | 20.555 | 3510 | 9,525,572 | 517,484.4 | 1.083  | 19.78  |

| Pk # | RT     | Hit | Compound Name                                | Match | R.Match | Prob. | CAS        | Library |
|------|--------|-----|----------------------------------------------|-------|---------|-------|------------|---------|
| 8    | 20.555 | 1   | Hexadecanoic acid, methyl ester              | 544   | 801     | 10.2  | 112-39-0   | replib  |
|      |        | 2   | Undecanoic acid, 2-methyl-                   | 536   | 838     | 7.6   | 24323-25-9 | mainlib |
|      |        | 3   | Tetracosanoic acid, methyl ester             | 518   | 619     | 3.9   | 2442-49-1  | replib  |
|      |        | 4   | Heptacosanoic acid, methyl ester             | 517   | 676     | 3.8   | 55682-91-2 | mainlib |
|      |        | 5   | Hexadecanoic acid, methyl ester              | 517   | 673     | 10.2  | 112-39-0   | mainlib |
|      |        | 6   | Decanoic acid, 2-methyl-                     | 516   | 859     | 3.6   | 24323-23-7 | mainlib |
|      |        | 7   | Hexadecanoic acid, 15-methyl-, methyl ester  | 515   | 745     | 3.5   | 6929-04-0  | mainlib |
|      |        | 8   | Pentadecanoic acid, 14-methyl-, methyl ester | 514   | 714     | 3.3   | 5129-60-2  | mainlib |
|      |        | 9   | Hexadecanoic acid, 14-methyl-, methyl ester  | 514   | 600     | 3.3   | 2490-49-5  | mainlib |
|      |        | 10  | Methyl tetradecanoate                        | 510   | 707     | 2.8   | 124-10-7   | replib  |

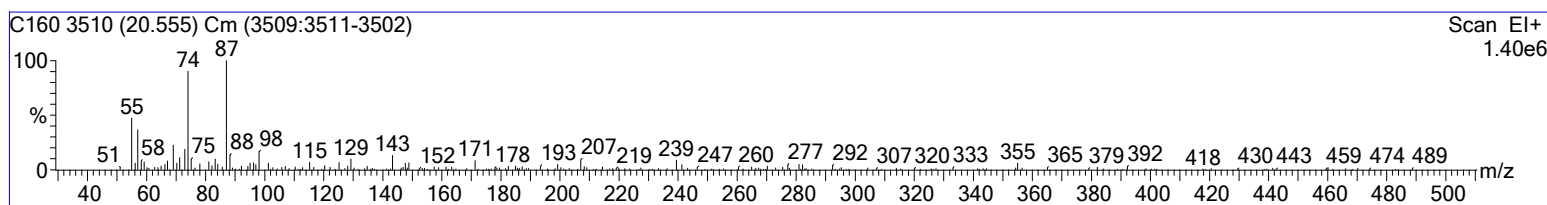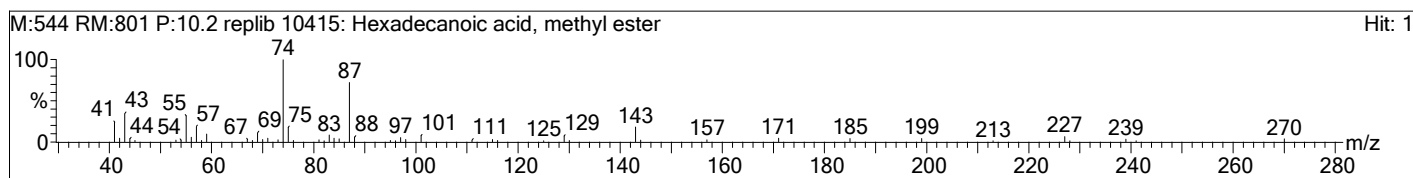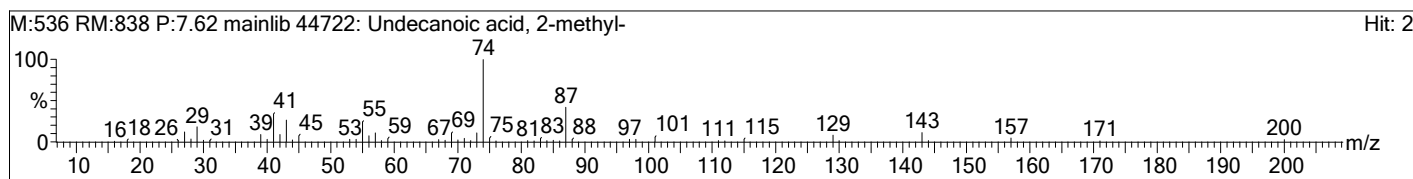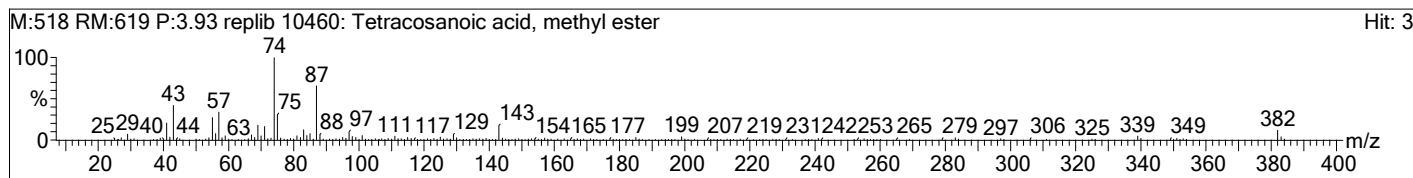



# TAMILNADU AGRICULTURAL UNIVERSITY - AGRICULTURAL MICROBIOLOGY

INSTRUMENT: PERKIN ELMER CLARUS SQ8C  
 INJECTION VOL: 1 MICRO LITER  
 SAMPLE ID : C160

COLOUMN: DB-5 MS CAPILARY STANDARD NON - POLARCOLOUMN  
 DIMENSION: 30Mts, ID: 0.25 mm, FILM: 0.25 IM CARRIER GAS: He

| # | RT     | Scan | Height    | Area      | Area % | Norm % |
|---|--------|------|-----------|-----------|--------|--------|
| 9 | 21.051 | 3609 | 4,116,618 | 157,959.8 | 0.330  | 6.04   |

| Pk # | RT     | Hit | Compound Name                                                                    | Match | R.Match | Prob. | CAS        | Library   |
|------|--------|-----|----------------------------------------------------------------------------------|-------|---------|-------|------------|-----------|
| 9    | 21.051 | 1   | Diethyl phthalate                                                                | 583   | 900     | 52.1  | 84-66-2    | nist_msms |
|      |        | 2   | Metaproterenol                                                                   | 548   | 902     | 13.1  | 586-06-1   | nist_msms |
|      |        | 3   | Methyldopa                                                                       | 491   | 929     | 2.4   | 555-30-6   | nist_msms |
|      |        | 4   | Ethaneperoxoic acid, 1-cyano-1-[2-(2-phenyl-1,3-dioxolan-2-yl)ethyl]pentyl ester | 481   | 920     | 1.7   | 58422-92-7 | mainlib   |
|      |        | 5   | 1,2-Benzenedicarboxylic acid                                                     | 481   | 918     | 1.7   | 88-99-3    | nist_msms |
|      |        | 6   | Benzoylmetronidazole                                                             | 477   | 875     | 1.5   | 13182-89-3 | nist_msms |
|      |        | 7   | Dibutyl phthalate                                                                | 474   | 686     | 1.3   | 84-74-2    | replib    |
|      |        | 8   | 1,2-Benzenedicarboxylic acid, butyl octyl ester                                  | 473   | 652     | 1.2   | 84-78-6    | replib    |
|      |        | 9   | Benzyl butyl phthalate                                                           | 469   | 627     | 1.0   | 85-68-7    | replib    |
|      |        | 10  | 1,2-Benzenedicarboxylic acid, butyl 2-ethylhexyl ester                           | 463   | 676     | 0.8   | 85-69-8    | replib    |

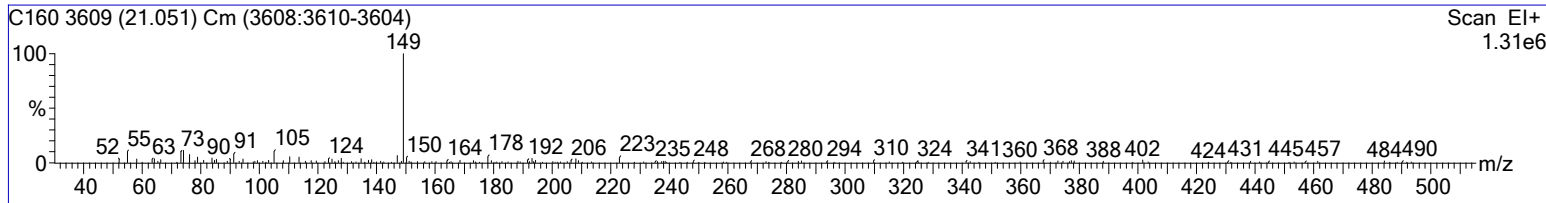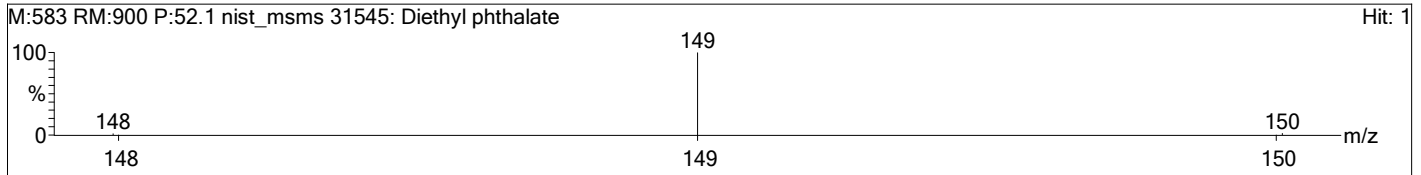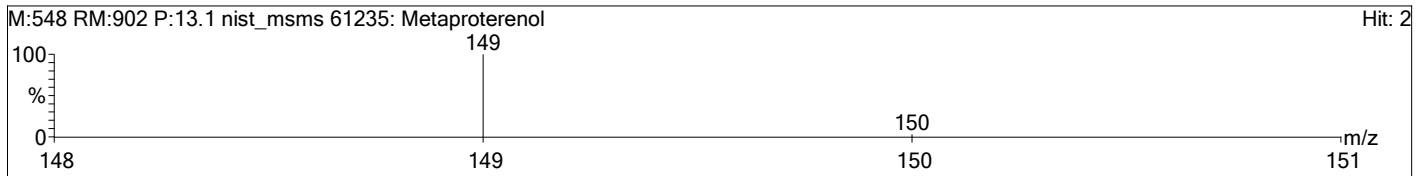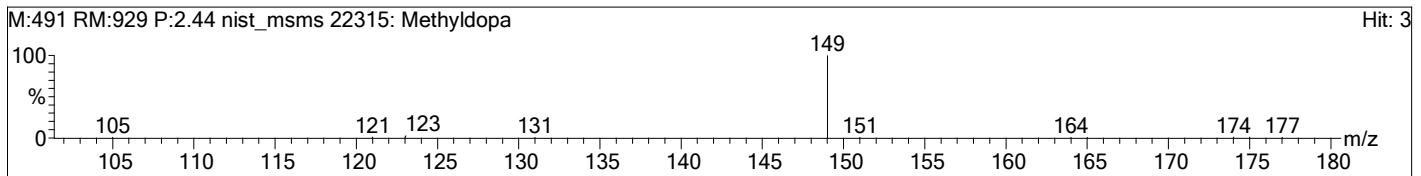

# TAMILNADU AGRICULTURAL UNIVERSITY - AGRICULTURAL MICROBIOLOGY

INSTRUMENT: PERKIN ELMER CLARUS SQ8C  
 INJECTION VOL: 1 MICRO LITER  
 SAMPLE ID : C160

COLOUMN: DB-5 MS CAPILARY STANDARD NON - POLARCOLOUMN  
 DIMENSION: 30Mts, ID: 0.25 mm, FILM: 0.25 IM CARRIER GAS: He

| #  | RT     | Scan | Height    | Area      | Area % | Norm % |
|----|--------|------|-----------|-----------|--------|--------|
| 10 | 21.196 | 3638 | 3,936,683 | 150,992.9 | 0.316  | 5.77   |

| Pk # | RT     | Hit | Compound Name                                             | Match | R.Match | Prob. | CAS        | Library |
|------|--------|-----|-----------------------------------------------------------|-------|---------|-------|------------|---------|
| 10   | 21.196 | 1   | Dasycarpidan-1-methanol, acetate (ester)                  | 442   | 509     | 5.3   | 55724-48-6 | mainlib |
|      |        | 2   | Octadecanoic acid, 2-hydroxy-1,3-propanediyl ester        | 442   | 498     | 5.3   | 504-40-5   | replib  |
|      |        | 3   | Octadecanoic acid, 4-hydroxybutyl ester                   | 440   | 516     | 4.9   | 15337-64-1 | mainlib |
|      |        | 4   | Hexadecanoic acid, 1-(hydroxymethyl)-1,2-ethanediyl ester | 437   | 476     | 4.3   | 761-35-3   | mainlib |
|      |        | 5   | Pentadecanoic acid, 14-bromo-                             | 434   | 523     | 3.8   | 74685-41-9 | mainlib |
|      |        | 6   | n-Decanoic acid                                           | 432   | 618     | 3.5   | 334-48-5   | replib  |
|      |        | 7   | Octadecanoic acid                                         | 430   | 542     | 3.2   | 57-11-4    | replib  |
|      |        | 8   | Octadecanoic acid                                         | 427   | 555     | 3.2   | 57-11-4    | mainlib |
|      |        | 9   | Pentadecanoic acid, 15-bromo-                             | 426   | 513     | 2.8   | 56523-59-2 | mainlib |
|      |        | 10  | Octadecanoic acid                                         | 425   | 592     | 3.2   | 57-11-4    | replib  |

C160 3638 (21.196) Cm (3637:3639-3626)

Scan EI+  
4.03e5

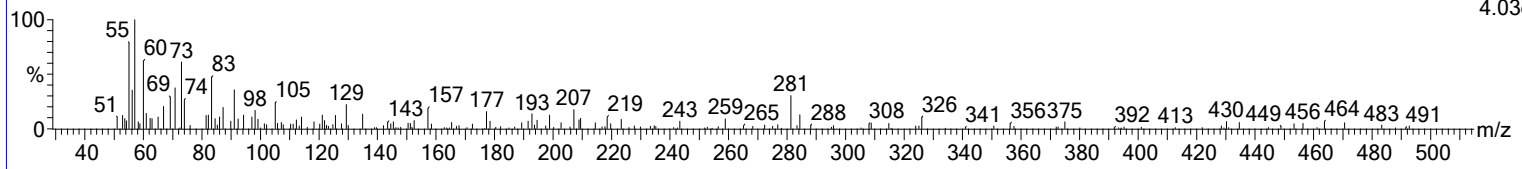

M:442 RM:509 P:5.31 mainlib 35331: Dasycarpidan-1-methanol, acetate (ester)

Hit: 1

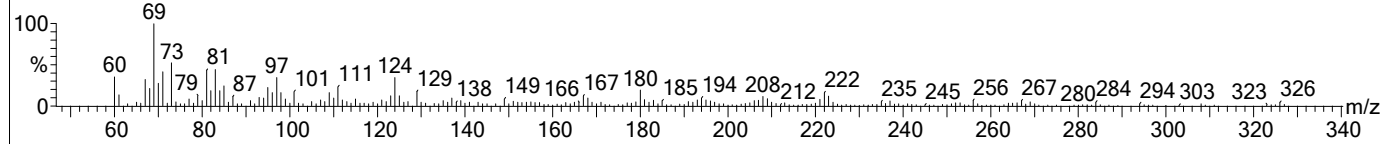

M:442 RM:498 P:5.31 replib 2272: Octadecanoic acid, 2-hydroxy-1,3-propanediyl ester

Hit: 2

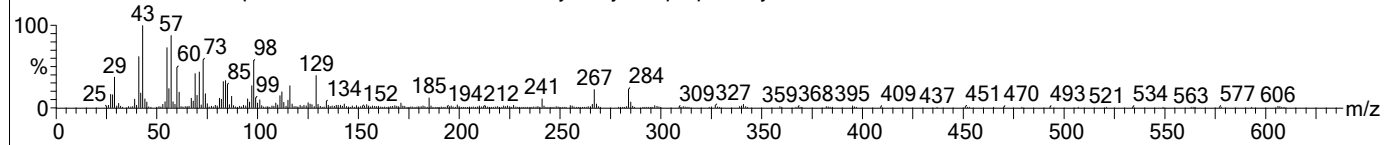

M:440 RM:516 P:4.9 mainlib 40609: Octadecanoic acid, 4-hydroxybutyl ester

Hit: 3

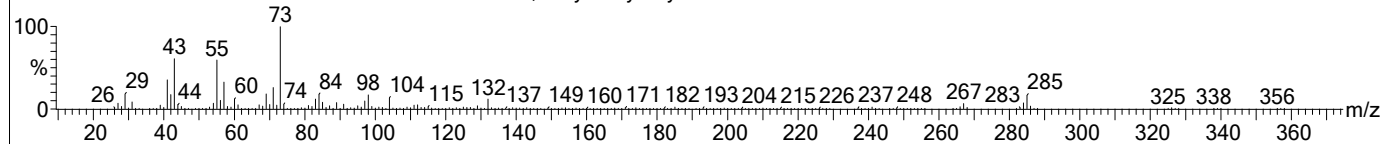

# TAMILNADU AGRICULTURAL UNIVERSITY - AGRICULTURAL MICROBIOLOGY

INSTRUMENT: PERKIN ELMER CLARUS SQ8C  
 INJECTION VOL: 1 MICRO LITER  
 SAMPLE ID : C160

COLOUMN: DB-5 MS CAPILARY STANDARD NON - POLARCOLOUMN  
 DIMENSION: 30Mts, ID: 0.25 mm, FILM: 0.25 IM CARRIER GAS: He

| #  | RT     | Scan | Height    | Area      | Area % | Norm % |
|----|--------|------|-----------|-----------|--------|--------|
| 11 | 21.326 | 3664 | 3,183,206 | 156,253.2 | 0.327  | 5.97   |

| PK # | RT     | Hit | Compound Name                                                                                                                                                                                                                                    | Match | R.Match | Prob. | CAS        | Library |
|------|--------|-----|--------------------------------------------------------------------------------------------------------------------------------------------------------------------------------------------------------------------------------------------------|-------|---------|-------|------------|---------|
| 11   | 21.326 | 1   | 6-Hydroxy-powelline-N-nitroso-7-demethoxy-, aldehyde                                                                                                                                                                                             | 373   | 442     | 12.0  |            | mainlib |
|      |        | 2   | Bufa-20,22-dienolide, 14,15-epoxy-3,16-dihydroxy-, (3á,5á,15á,16á)-                                                                                                                                                                              | 371   | 405     | 11.1  | 4026-95-3  | mainlib |
|      |        | 3   | 4H-Cyclopropa[5',6']benz[1',2':7,8]azuleno[5,6-b]oxiren-4-one, 8,8a-bis(acetyloxy)-2a-[(acetyloxy)methyl]-1,1a,1b,1c,2a,3,3a,6a,6b,7,8,8a-dodecahydro-6b-hydroxy-3a-methoxy-1,1,5,7-tetramethyl-, [1aR-(1aá,1bá,1cá,2aá,3aá,6aá,6bá,7á,8á,8aá)]- | 363   | 374     | 8.2   | 64807-01-8 | mainlib |
|      |        | 4   | Bufa-20,22-dienolide, 14,15-epoxy-3,11-dihydroxy-, (3á,5á,11á,15á)-                                                                                                                                                                              | 361   | 399     | 7.6   | 39005-15-7 | mainlib |
|      |        | 5   | Powelline, 6-hydroxy-                                                                                                                                                                                                                            | 346   | 425     | 4.6   | 31128-98-0 | mainlib |
|      |        | 6   | Bufa-20,22-dienolide, 16-(acetyloxy)-14,15-epoxy-3-hydroxy-, (3á,5á,15á,16á)-                                                                                                                                                                    | 342   | 367     | 3.9   | 470-37-1   | mainlib |
|      |        | 7   | 7,7-Dibromobicyclo[2.2.1]heptane-1-carboxylic acid, methyl ester                                                                                                                                                                                 | 336   | 431     | 3.1   | 59093-00-4 | mainlib |
|      |        | 8   | Chlortetracycline                                                                                                                                                                                                                                | 334   | 349     | 2.8   | 57-62-5    | replib  |
|      |        | 9   | Pregn-16-en-20-one, 11,18-bis(acetyloxy)-3,9-epoxy-3-methoxy-, (3á,5á,11á)-                                                                                                                                                                      | 332   | 354     | 2.6   | 30384-39-5 | mainlib |
|      |        | 10  | Bufa-20,22-dienolide, 3-(acetyloxy)-14,15-epoxy-16-hydroxy-, (3á,5á,15á,16á)-                                                                                                                                                                    | 329   | 349     | 2.3   | 4026-96-4  | replib  |

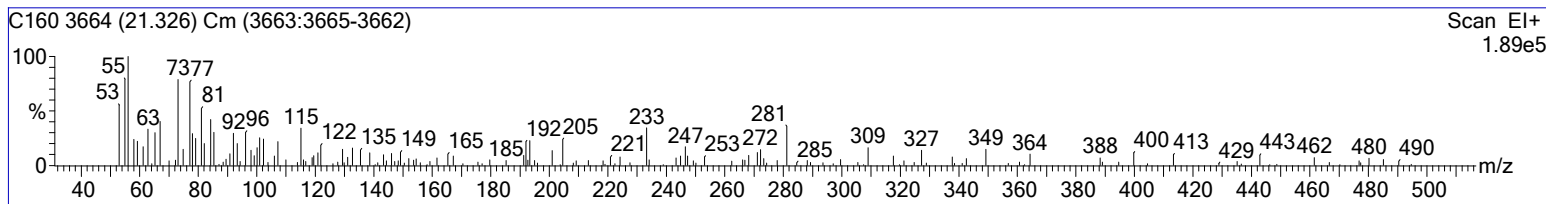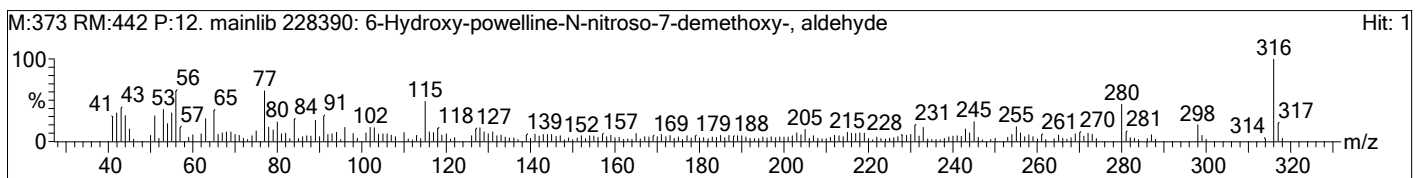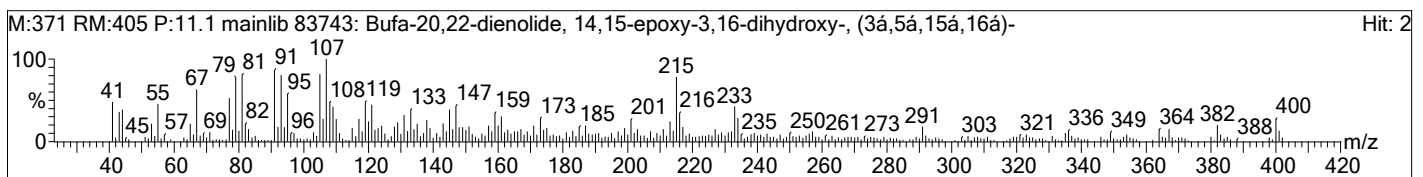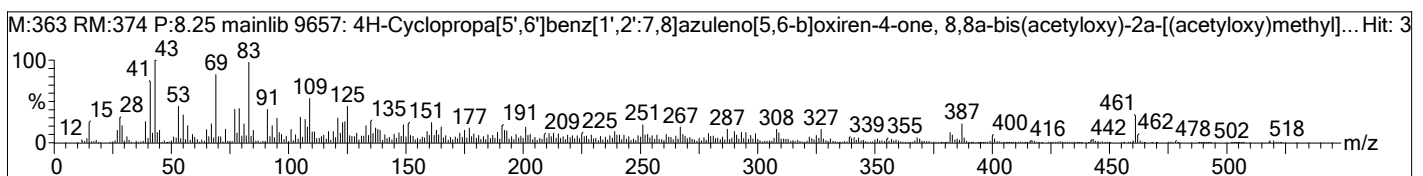

# TAMILNADU AGRICULTURAL UNIVERSITY - AGRICULTURAL MICROBIOLOGY

INSTRUMENT: PERKIN ELMER CLARUS SQ8C  
 INJECTION VOL: 1 MICRO LITER  
 SAMPLE ID : C160

COLOUMN: DB-5 MS CAPILARY STANDARD NON - POLARCOLOUMN  
 DIMENSION: 30Mts, ID: 0.25 mm, FILM: 0.25 IM CARRIER GAS: He

| #  | RT     | Scan | Height    | Area      | Area % | Norm % |
|----|--------|------|-----------|-----------|--------|--------|
| 12 | 21.821 | 3763 | 2,408,792 | 167,188.4 | 0.350  | 6.39   |

| Pk # | RT     | Hit | Compound Name                                                                                           | Match | R.Match | Prob. | CAS         | Library |
|------|--------|-----|---------------------------------------------------------------------------------------------------------|-------|---------|-------|-------------|---------|
| 12   | 21.821 | 1   | 6-Amino-5-cyano-4-(5-cyano-2,4-dimethyl-1H-pyrrol-3-yl)-2-methyl-4H-pyran-3-carboxylic acid ethyl ester | 396   | 473     | 13.6  |             | mainlib |
|      |        | 2   | 1-Benzazirene-1-carboxylic acid, 2,2,5a-trimethyl-1a-[3-oxo-1-butenyl] perhydro-, methyl ester          | 380   | 469     | 7.8   |             | mainlib |
|      |        | 3   | 2H-3,9a-Methano-1-benzoxepin, octahydro-2,2,5a,9-tetramethyl-, [3R-(3à,5aà,9à,9aà)]-                    | 367   | 502     | 5.0   | 5956-09-2   | replib  |
|      |        | 4   | Malonic acid, mononitrile, monothioamide, 2-(3-methyl-2-thienylmethylene)-                              | 358   | 470     | 3.7   | 310454-37-6 | mainlib |
|      |        | 5   | 2-(1-Cyclohexyl-1H-tetrazol-5-ylsulfanylmethyl)-6-nitro-1H-benzimidazole                                | 355   | 455     | 3.2   |             | mainlib |
|      |        | 6   | 2,6-Di-t-butyl-octahydroazulene-3a,8-diol                                                               | 353   | 434     | 3.0   |             | mainlib |
|      |        | 7   | 2-Myristinoyl pantetheine                                                                               | 351   | 425     | 2.8   |             | mainlib |
|      |        | 8   | Thieno[2,3-c]furan-3-carbonitrile, 2-amino-4,6-dihydro-4,4,6,6-tetramethyl-                             | 348   | 459     | 2.4   | 447412-24-0 | mainlib |
|      |        | 9   | Carvacrol, TBDMS derivative                                                                             | 348   | 454     | 2.4   |             | mainlib |
|      |        | 10  | (2R,3R,4aR,5S,8aS)-2-Hydroxy-4a,5-dimethyl-3-(prop-1-en-2-yl)octahydronaphthalen-1(2H)-one              | 344   | 448     | 2.0   | 66884-74-0  | mainlib |

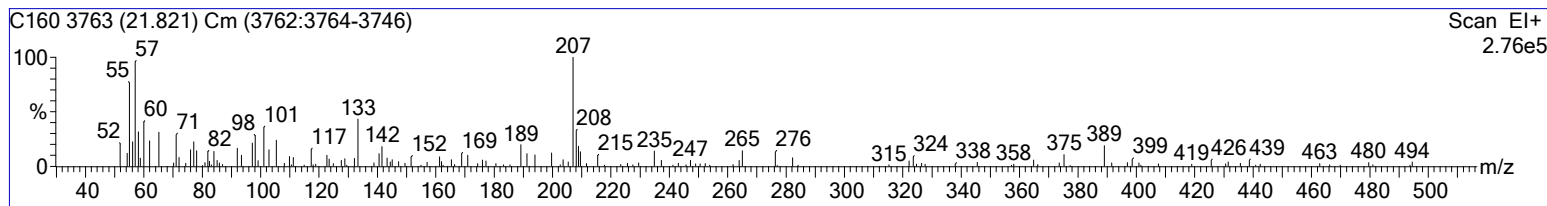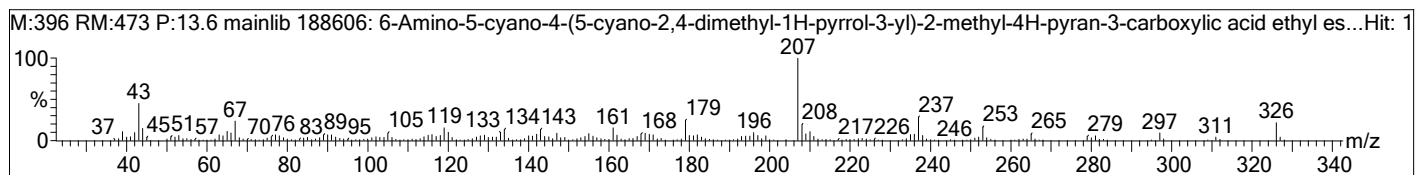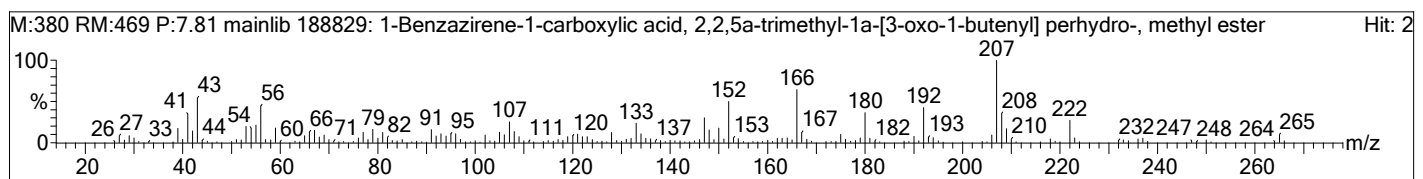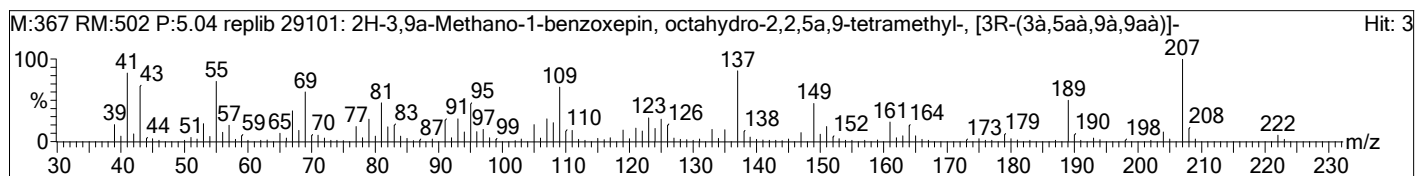

# TAMILNADU AGRICULTURAL UNIVERSITY - AGRICULTURAL MICROBIOLOGY

INSTRUMENT: PERKIN ELMER CLARUS SQ8C  
 INJECTION VOL: 1 MICRO LITER  
 SAMPLE ID : C160

COLOUMN: DB-5 MS CAPILARY STANDARD NON - POLARCOLOUMN  
 DIMENSION: 30Mts, ID: 0.25 mm, FILM: 0.25 IM CARRIER GAS: He

| #  | RT     | Scan | Height     | Area      | Area % | Norm % |
|----|--------|------|------------|-----------|--------|--------|
| 13 | 24.332 | 4265 | 10,652,421 | 456,686.2 | 0.955  | 17.46  |

| Pk # | RT     | Hit | Compound Name                                | Match | R.Match | Prob. | CAS        | Library |
|------|--------|-----|----------------------------------------------|-------|---------|-------|------------|---------|
| 13   | 24.332 | 1   | Heptadecanoic acid, 16-methyl-, methyl ester | 597   | 681     | 19.1  | 5129-61-3  | mainlib |
|      |        | 2   | Methyl stearate                              | 581   | 709     | 11.0  | 112-61-8   | replib  |
|      |        | 3   | Heptadecanoic acid, 9-methyl-, methyl ester  | 574   | 651     | 8.4   | 54934-57-5 | mainlib |
|      |        | 4   | Methyl stearate                              | 571   | 718     | 11.0  | 112-61-8   | replib  |
|      |        | 5   | Methyl stearate                              | 571   | 666     | 11.0  | 112-61-8   | mainlib |
|      |        | 6   | Heptadecanoic acid, 10-methyl-, methyl ester | 570   | 643     | 7.1   | 2490-25-7  | mainlib |
|      |        | 7   | Heptadecanoic acid, 16-methyl-, methyl ester | 568   | 640     | 19.1  | 5129-61-3  | replib  |
|      |        | 8   | Methyl stearate                              | 565   | 752     | 11.0  | 112-61-8   | replib  |
|      |        | 9   | Hexadecanoic acid, 15-methyl-, methyl ester  | 563   | 638     | 5.4   | 6929-04-0  | replib  |
|      |        | 10  | Hexadecanoic acid, 14-methyl-, methyl ester  | 558   | 629     | 4.4   | 2490-49-5  | mainlib |

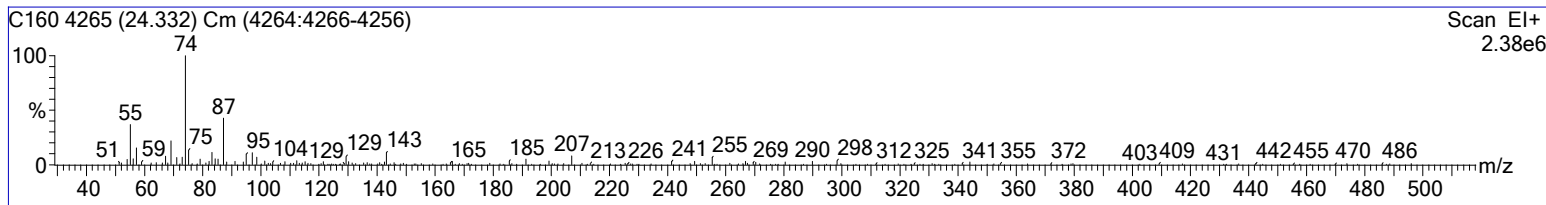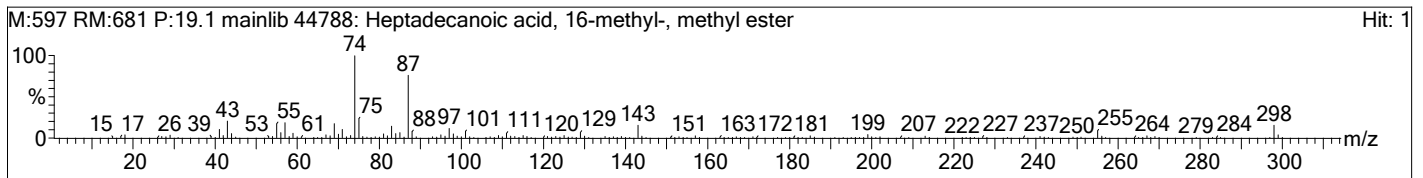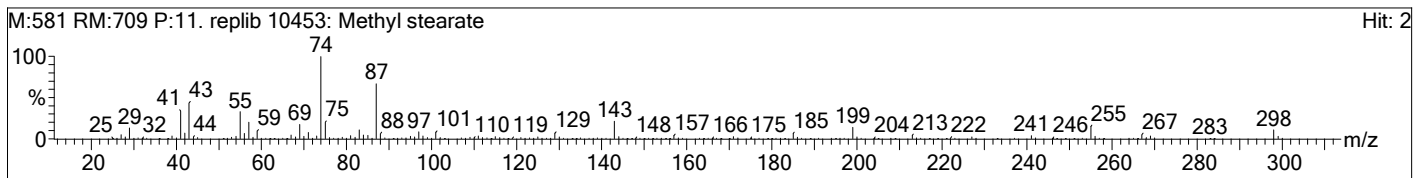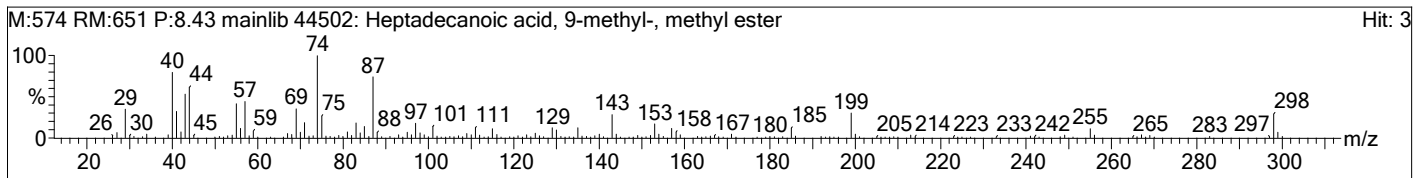

# TAMILNADU AGRICULTURAL UNIVERSITY - AGRICULTURAL MICROBIOLOGY

INSTRUMENT: PERKIN ELMER CLARUS SQ8C  
 INJECTION VOL: 1 MICRO LITER  
 SAMPLE ID : C160

COLOUMN: DB-5 MS CAPILARY STANDARD NON - POLARCOLOUMN  
 DIMENSION: 30Mts, ID: 0.25 mm, FILM: 0.25 IM CARRIER GAS: He

| #  | RT     | Scan | Height    | Area      | Area % | Norm % |
|----|--------|------|-----------|-----------|--------|--------|
| 14 | 29.834 | 5365 | 5,393,782 | 197,319.5 | 0.413  | 7.54   |

| Pk # | RT     | Hit | Compound Name                                                     | Match | R.Match | Prob. | CAS        | Library |
|------|--------|-----|-------------------------------------------------------------------|-------|---------|-------|------------|---------|
| 14   | 29.834 | 1   | Benzoic acid, 4-methyl-2-trimethylsilyloxy-, trimethylsilyl ester | 427   | 544     | 12.2  | 35-27-8    | mainlib |
|      |        | 2   | Spirost-8-en-11-one, 3-hydroxy-, (3á,5à,14á,20á,22á,25R)-         | 413   | 463     | 7.6   | 58072-54-1 | mainlib |
|      |        | 3   | Octadecane, 1,1'-[1,3-propanediylbis(oxy)]bis-                    | 410   | 437     | 6.8   | 17367-38-3 | mainlib |
|      |        | 4   | 3-Methylsalicylic acid, 2TMS derivative                           | 409   | 504     | 6.5   |            | mainlib |
|      |        | 5   | Stearic acid, 3-(octadecyloxy)propyl ester                        | 408   | 441     | 6.2   | 17367-40-7 | mainlib |
|      |        | 6   | Methyl glycocholate, 3TMS derivative                              | 396   | 431     | 4.2   | 57326-16-6 | mainlib |
|      |        | 7   | 2-(tert.-Butyldimethylsilyloxy)benzylidene acetophenone           | 395   | 505     | 4.0   |            | mainlib |
|      |        | 8   | 1,2-Propanediol, 3-(octadecyloxy)-, diacetate                     | 395   | 456     | 4.0   | 21994-81-0 | mainlib |
|      |        | 9   | Hexadecanoic acid, 1-(hydroxymethyl)-1,2-ethanediyl ester         | 393   | 419     | 3.7   | 761-35-3   | mainlib |
|      |        | 10  | 5-Methylsalicylic acid, 2TMS derivative                           | 388   | 503     | 3.0   |            | mainlib |

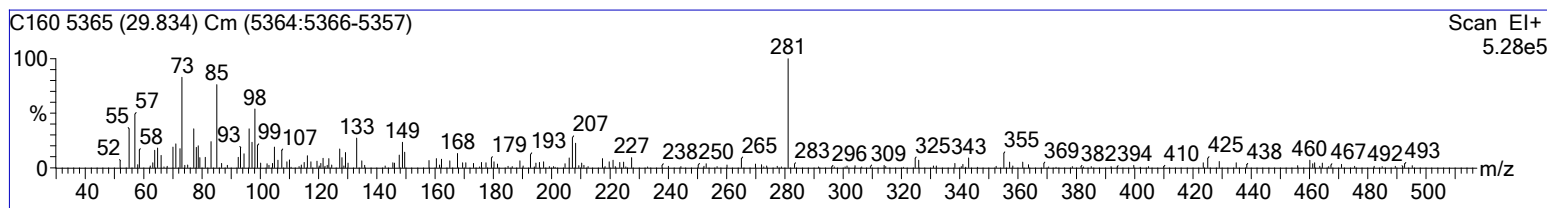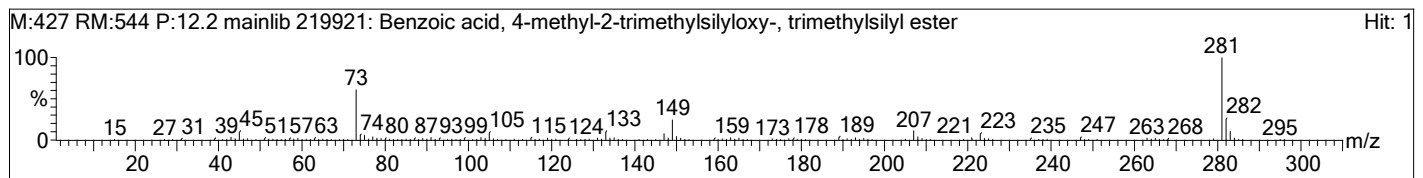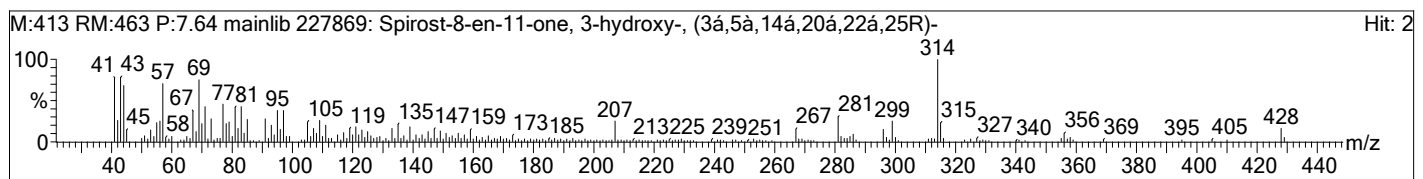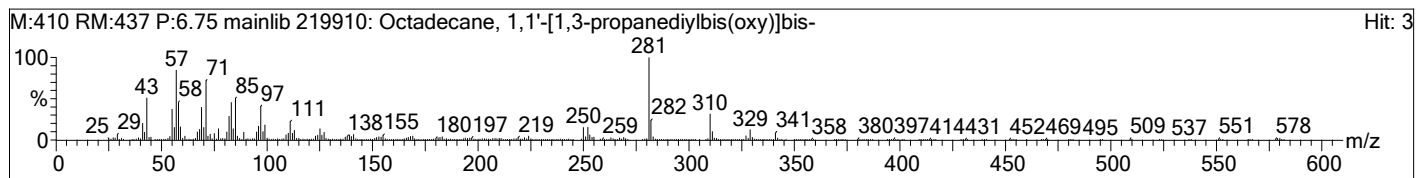

# TAMILNADU AGRICULTURAL UNIVERSITY - AGRICULTURAL MICROBIOLOGY

INSTRUMENT: PERKIN ELMER CLARUS SQ8C  
 INJECTION VOL: 1 MICRO LITER  
 SAMPLE ID : C160

COLOUMN: DB-5 MS CAPILARY STANDARD NON - POLARCOLOUMN  
 DIMENSION: 30Mts, ID: 0.25 mm, FILM: 0.25 IM CARRIER GAS: He

| #  | RT     | Scan | Height    | Area      | Area % | Norm % |
|----|--------|------|-----------|-----------|--------|--------|
| 15 | 30.539 | 5506 | 4,350,617 | 183,841.0 | 0.385  | 7.03   |

| PK # | RT     | Hit | Compound Name                                                                                          | Match | R.Match | Prob. | CAS         | Library |
|------|--------|-----|--------------------------------------------------------------------------------------------------------|-------|---------|-------|-------------|---------|
| 15   | 30.539 | 1   | Hexa-t-butylselenatrisiletane                                                                          | 431   | 455     | 21.2  | 93194-15-1  | mainlib |
|      |        | 2   | 3-Dimethylamino-2-(4-chlorphenyl)-thioacrylic acid, thiomorpholide                                     | 399   | 452     | 5.7   |             | mainlib |
|      |        | 3   | 1,9-Dioxa-5-thianonane, 3,7-bis(9-borabicyclo[3.3.1]non-9-yloxy)-1,9-diphenyl-                         | 398   | 426     | 5.4   |             | mainlib |
|      |        | 4   | (-)-Myrtenol, TBDMS derivative                                                                         | 392   | 517     | 4.3   |             | mainlib |
|      |        | 5   | Hexadecanoic acid, (2-phenyl-1,3-dioxolan-4-yl)methyl ester, cis-                                      | 392   | 427     | 4.3   | 42495-31-8  | mainlib |
|      |        | 6   | 18,19-Secoyohimban-19-oic acid, 16,17,20,21-tetradehydro-16-(hydroxymethyl)-, methyl ester, (15á,16E)- | 383   | 443     | 3.1   | 5523-49-9   | mainlib |
|      |        | 7   | 1-Methoxy-4-nitro-2,3,5,6-tetramethylbenzene                                                           | 381   | 522     | 2.9   | 52415-08-4  | mainlib |
|      |        | 8   | Isodemecolcine, N-desmethyl-                                                                           | 375   | 423     | 2.2   | 102419-92-1 | replib  |
|      |        | 9   | 1,5-Bis(4-methoxyphenyl)bicyclo[3.2.0]heptane                                                          | 372   | 417     | 2.0   | 157367-56-1 | mainlib |
|      |        | 10  | 1-(2,4-Dichloro-phenyl)-N'-hydroxy-cyclopropanecarboxamide                                             | 370   | 465     | 1.8   |             | mainlib |

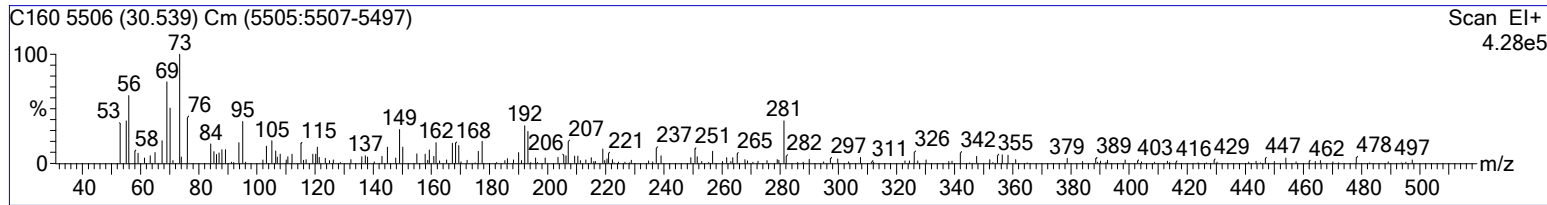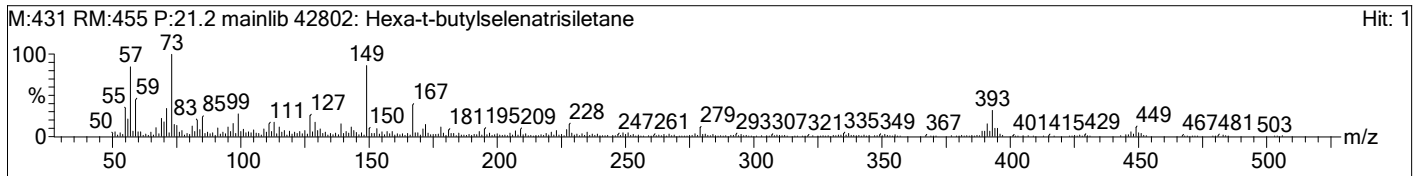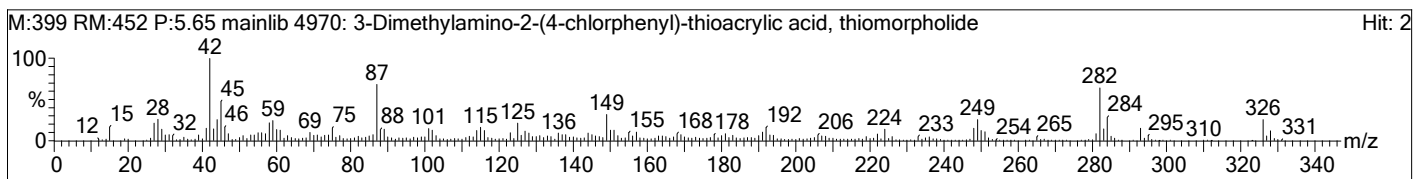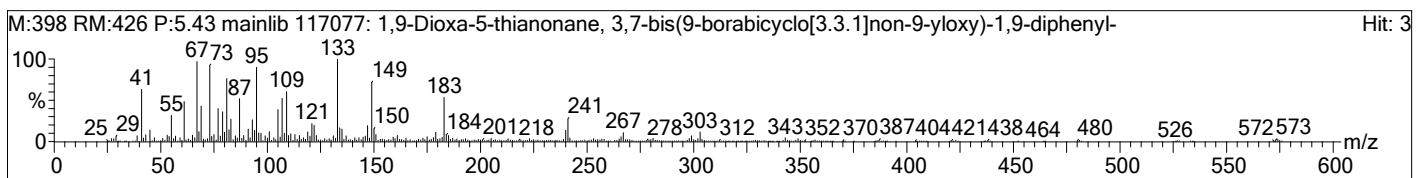

# TAMILNADU AGRICULTURAL UNIVERSITY - AGRICULTURAL MICROBIOLOGY

INSTRUMENT: PERKIN ELMER CLARUS SQ8C  
 INJECTION VOL: 1 MICRO LITER  
 SAMPLE ID : C160

COLOUMN: DB-5 MS CAPILARY STANDARD NON - POLARCOLOUMN  
 DIMENSION: 30Mts, ID: 0.25 mm, FILM: 0.25 IM CARRIER GAS: He

| #  | RT     | Scan | Height    | Area      | Area % | Norm % |
|----|--------|------|-----------|-----------|--------|--------|
| 16 | 33.366 | 6071 | 7,920,426 | 360,421.4 | 0.754  | 13.78  |

| PK # | RT     | Hit | Compound Name                                                                                                                                                                                                       | Match | R.Match | Prob. | CAS        | Library |
|------|--------|-----|---------------------------------------------------------------------------------------------------------------------------------------------------------------------------------------------------------------------|-------|---------|-------|------------|---------|
| 16   | 33.366 | 1   | á-D-Glucopyranosiduronic acid, 3-(5-ethylhexahydro-2,4,6-trioxo-5-pyrimidinyl)-1,1-dimethylpropyl 2,3,4-tris-O-(trimethylsilyl)-, methyl ester                                                                      | 396   | 434     | 8.9   | 55556-80-4 | mainlib |
|      |        | 2   | Hexadecanoic acid, 1a,2,5,5a,6,9,10,10a-octahydro-5,5a-dihydroxy-4-(hydroxymethyl)-1,1,7,9-tetramethyl-11-oxo-1H-2,8a-methanocyclopenta[a]cyclopropa[e]cyclodecen-6-yl ester, [1aR-(1aà,2à,5á,5aá,6á,8aà,9à,10aà)]- | 389   | 389     | 6.8   | 52557-26-3 | mainlib |
|      |        | 3   | 9-Octadecenoic acid (Z)-, tetradecyl ester                                                                                                                                                                          | 379   | 426     | 4.8   | 22393-85-7 | mainlib |
|      |        | 4   | Endrin ketone                                                                                                                                                                                                       | 369   | 435     | 3.4   | 53494-70-5 | replib  |
|      |        | 5   | Dihydromorphine, 2TMS derivative                                                                                                                                                                                    | 368   | 396     | 3.2   |            | mainlib |
|      |        | 6   | 1,25-Dihydroxyvitamin D3, TMS derivative                                                                                                                                                                            | 367   | 502     | 3.1   | 55759-94-9 | mainlib |
|      |        | 7   | 9-Octadecenoic acid, (2-phenyl-1,3-dioxolan-4-yl)methyl ester, cis-                                                                                                                                                 | 366   | 425     | 3.0   | 56599-45-2 | mainlib |
|      |        | 8   | Pseudosarsasapogenin-5,20-dien                                                                                                                                                                                      | 363   | 462     | 2.7   |            | mainlib |
|      |        | 9   | Decanoic acid, 1,1a,1b,4,4a,5,7a,7b,8,9-decahydro-4a,7b-dihydroxy-3-(hydroxymethyl)-1,1,6,8-tetramethyl-5-oxo-9aH-cyclopropa[3,4]benz[1,2-e]azulene-9,9a-diyl ester, [1aR-(1aà,1bá,4aá,7aà,7bà,8á,9á,9aà)]-         | 363   | 372     | 2.7   | 24928-17-4 | replib  |
|      |        | 10  | Crinamine, 1,2-dihydro-6-hydroxy-11-oxo-                                                                                                                                                                            | 362   | 428     | 2.5   |            | mainlib |

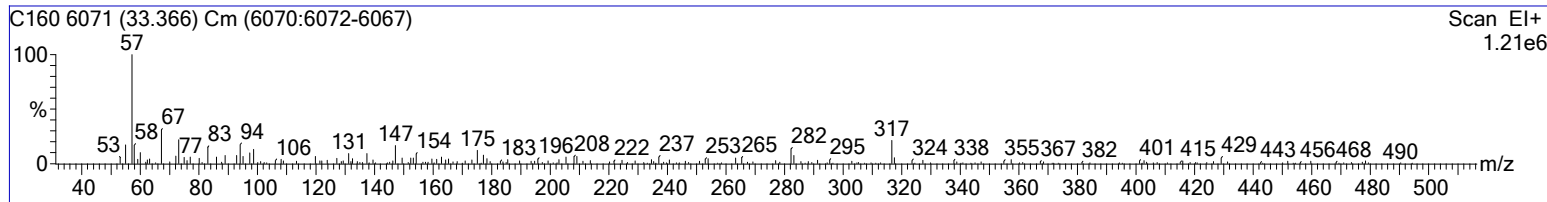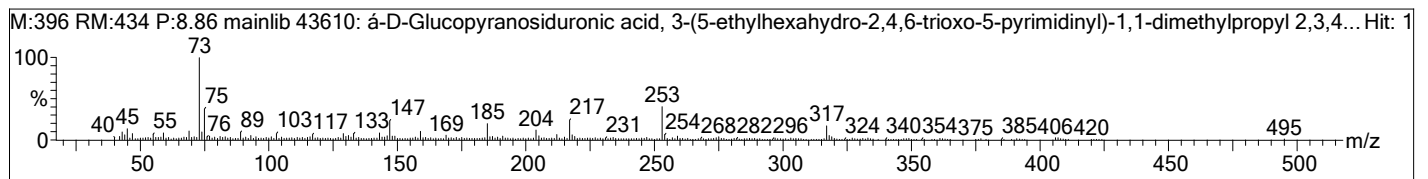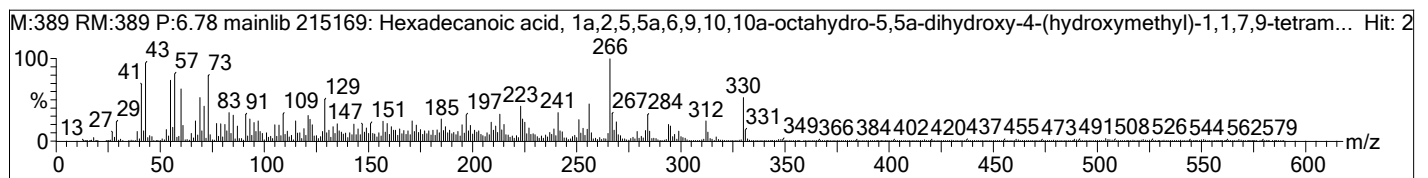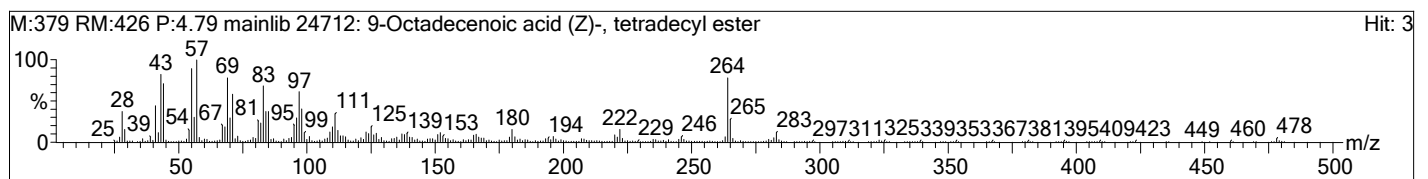



# TAMILNADU AGRICULTURAL UNIVERSITY - AGRICULTURAL MICROBIOLOGY

INSTRUMENT: PERKIN ELMER CLARUS SQ8C  
 INJECTION VOL: 1 MICRO LITER  
 SAMPLE ID : C160

COLOUMN: DB-5 MS CAPILARY STANDARD NON - POLARCOLOUMN  
 DIMENSION: 30Mts, ID: 0.25 mm, FILM: 0.25 IM CARRIER GAS: He

| #  | RT     | Scan | Height    | Area      | Area % | Norm % |
|----|--------|------|-----------|-----------|--------|--------|
| 17 | 33.451 | 6088 | 8,064,527 | 324,254.1 | 0.678  | 12.39  |

| Pk # | RT     | Hit | Compound Name                                                                                                        | Match | R.Match | Prob. | CAS         | Library |
|------|--------|-----|----------------------------------------------------------------------------------------------------------------------|-------|---------|-------|-------------|---------|
| 17   | 33.451 | 1   | 17-(1,5-Dimethylhexyl)-10,13-dimethyl-3-styrylhexadecahydrocyclopenta[a]phenanthren-2-one                            | 400   | 417     | 11.4  |             | mainlib |
|      |        | 2   | Methyl glycocholate, 3TMS derivative                                                                                 | 393   | 431     | 8.8   | 57326-16-6  | mainlib |
|      |        | 3   | 17a-Methyl-3á-methoxy-17a-aza-D-homoandrost-5-ene-17-one                                                             | 374   | 464     | 4.3   | 149942-10-9 | mainlib |
|      |        | 4   | 2-Myristynoyl pantetheine                                                                                            | 373   | 457     | 4.1   |             | mainlib |
|      |        | 5   | 11à-Hydroxyprogesterone, trimethylsilyl ether, bis(O-methyloxime)                                                    | 371   | 384     | 3.8   |             | mainlib |
|      |        | 6   | Chromone, 5-hydroxy-6,7,8-trimethoxy-2,3-dimethyl-                                                                   | 369   | 452     | 3.5   |             | mainlib |
|      |        | 7   | 1,5,8-Trimethoxy-12a-methyl-1,2,3,3a,3b,4,5,6,7,8,9,10,10b,11,12,12a-hexadecahydro-benzo[3,4]cyclohepta[1,2-E]indene | 367   | 426     | 3.2   |             | mainlib |
|      |        | 8   | 9,10-Secocholesta-5,7,10(19)-triene-3,24,25-triol, (3á,5Z,7E)-                                                       | 366   | 475     | 3.1   | 40013-87-4  | mainlib |
|      |        | 9   | Spirost-8-en-11-one, 3-hydroxy-, (3á,5à,14á,20á,22á,25R)-                                                            | 364   | 428     | 2.8   | 58072-54-1  | mainlib |
|      |        | 10  | 2-(2-Azepan-1-yl-2-oxoethyl)-1-hydroxy-1-phenyl-octahydro-pyrido[1,2-a]azepin-4-one                                  | 353   | 429     | 2.0   |             | mainlib |

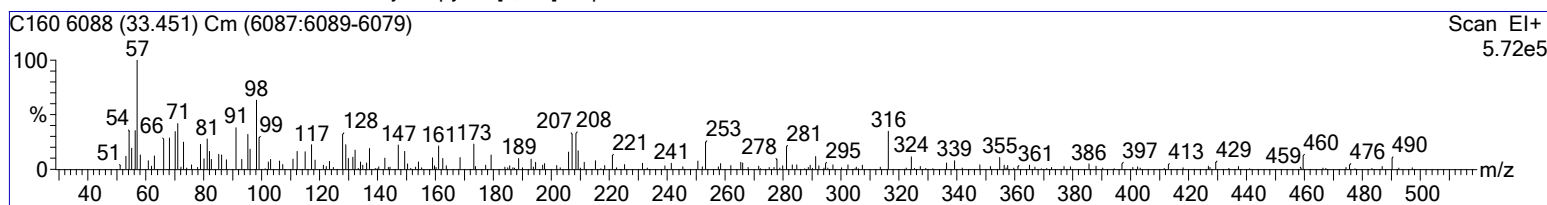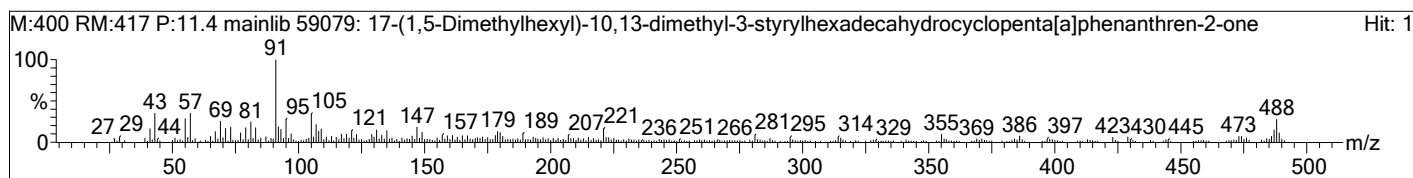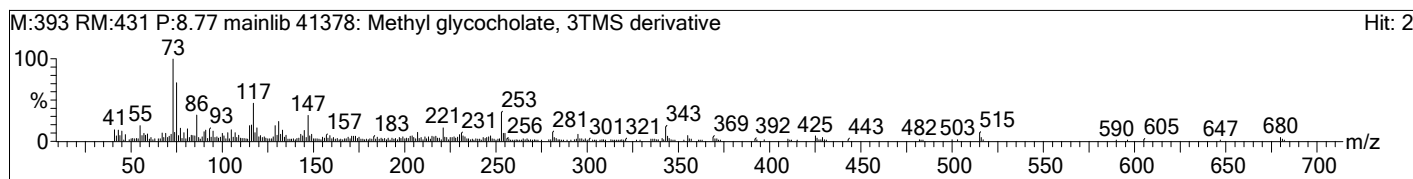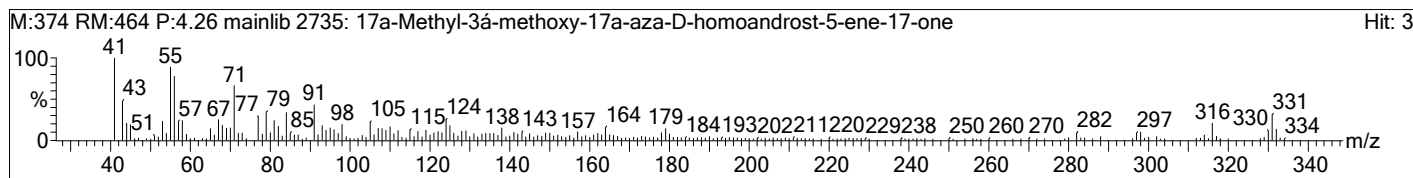

# TAMILNADU AGRICULTURAL UNIVERSITY - AGRICULTURAL MICROBIOLOGY

INSTRUMENT: PERKIN ELMER CLARUS SQ8C  
 INJECTION VOL: 1 MICRO LITER  
 SAMPLE ID : C160

COLOUMN: DB-5 MS CAPILARY STANDARD NON - POLARCOLOUMN  
 DIMENSION: 30Mts, ID: 0.25 mm, FILM: 0.25 IM CARRIER GAS: He

| #  | RT     | Scan | Height    | Area      | Area % | Norm % |
|----|--------|------|-----------|-----------|--------|--------|
| 18 | 33.486 | 6095 | 9,689,604 | 324,053.4 | 0.678  | 12.39  |

| Pk # | RT     | Hit | Compound Name                                                                                                               | Match | R.Match | Prob. | CAS         | Library |
|------|--------|-----|-----------------------------------------------------------------------------------------------------------------------------|-------|---------|-------|-------------|---------|
| 18   | 33.486 | 1   | Bicyclo[5.3.0]decan-2-one, 9-(diphenylmethylene)-                                                                           | 370   | 450     | 7.7   | 345938-61-6 | mainlib |
|      |        | 2   | 2-Thiophenecarboxaldehyde, 5-ethynyl-, (2,4-dinitrophenyl)hydrazone                                                         | 359   | 460     | 5.2   | 56588-21-7  | mainlib |
|      |        | 3   | 1,3-Cyclohexanedione, 2-[4-(4-methoxyphenylamino)-2-thiazolyl]-                                                             | 347   | 448     | 3.5   |             | mainlib |
|      |        | 4   | 1-(3-Bromo-2-fluoro-4-nitro-phenyl)-4-methyl-piperidine                                                                     | 346   | 430     | 3.4   |             | mainlib |
|      |        | 5   | 16-Hydroxymethyleneandrost-5-en-3-ol-17-one                                                                                 | 345   | 408     | 3.2   |             | mainlib |
|      |        | 6   | 5-Oxo-3,4-dimethyl-2-pyrrolylideneacetothioic acid, à-(2H-3,4-dihydro-2-cyano-2,3,3-trimethylpyrrol-5-yl)-, S-t-butyl ester | 340   | 413     | 2.6   |             | mainlib |
|      |        | 7   | Acetonitrile, 2-(1,2-dihydro-5-trifluoromethyl-1-methylpyridin-2-ylideno)-2-(2-benzimidazolyl)-                             | 339   | 424     | 2.5   | 301313-00-8 | mainlib |
|      |        | 8   | 8-Amino-5-[3-chlorophenylthio]-6-methoxyquinoline                                                                           | 339   | 419     | 2.5   | 64895-56-3  | mainlib |
|      |        | 9   | 6-Hydroxy-powelline-N-nitroso-7-demethoxy-, aldehyde                                                                        | 339   | 416     | 2.5   |             | mainlib |
|      |        | 10  | 1-Phenylpiperazine, 4-(5-amino-2-fluoro-4-nitrophenyl)-                                                                     | 336   | 393     | 2.2   |             | mainlib |

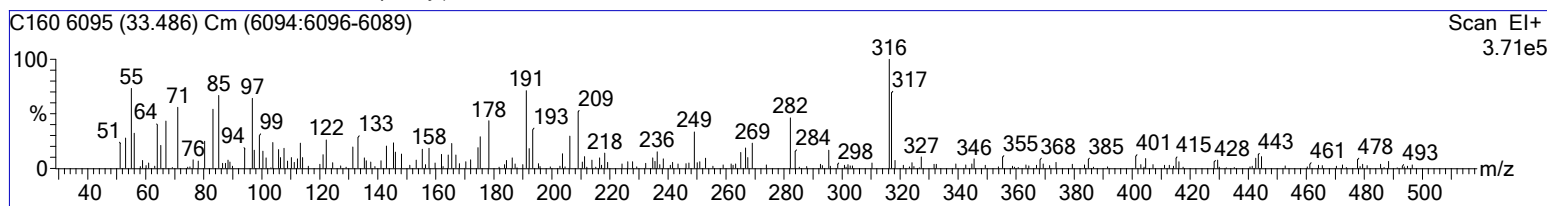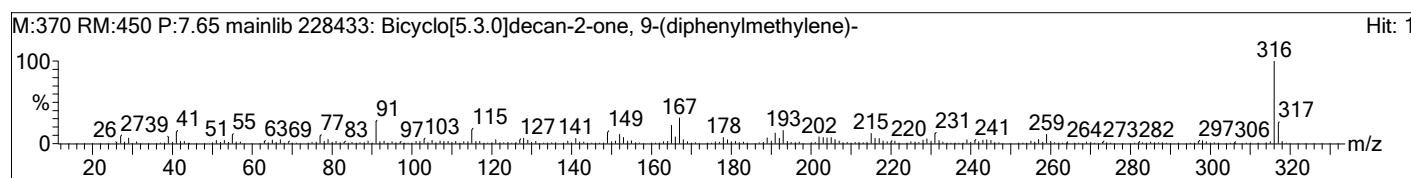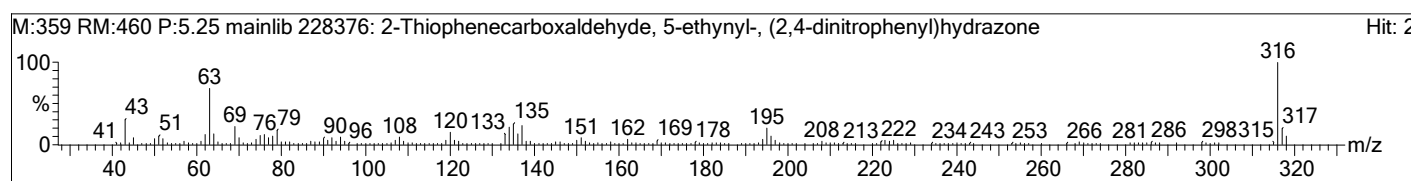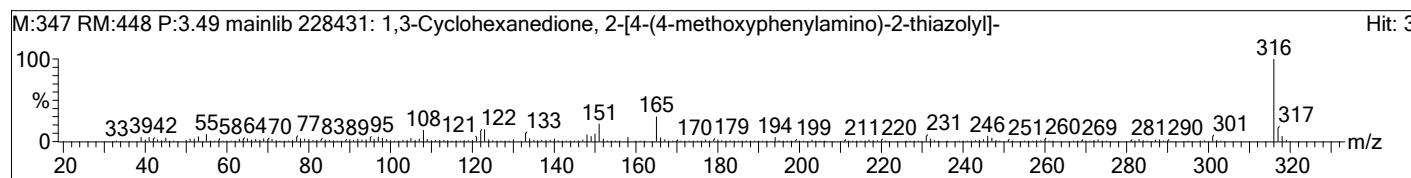

# TAMILNADU AGRICULTURAL UNIVERSITY - AGRICULTURAL MICROBIOLOGY

INSTRUMENT: PERKIN ELMER CLARUS SQ8C  
 INJECTION VOL: 1 MICRO LITER  
 SAMPLE ID : C160

COLOUMN: DB-5 MS CAPILARY STANDARD NON - POLARCOLOUMN  
 DIMENSION: 30Mts, ID: 0.25 mm, FILM: 0.25 IM CARRIER GAS: He

| #  | RT     | Scan | Height    | Area      | Area % | Norm % |
|----|--------|------|-----------|-----------|--------|--------|
| 19 | 33.541 | 6106 | 8,963,888 | 555,089.2 | 1.161  | 21.22  |

| PK # | RT     | Hit | Compound Name                                                                                                                       | Match | R.Match | Prob. | CAS        | Library |
|------|--------|-----|-------------------------------------------------------------------------------------------------------------------------------------|-------|---------|-------|------------|---------|
| 19   | 33.541 | 1   | 4-[4-(2-Methoxyphenyl)-1H-pyrazol-3-yl]benzene-1,3-diol                                                                             | 394   | 497     | 6.4   |            | mainlib |
|      |        | 2   | Corynan-17-ol, 18,19-didehydro-10-methoxy-, acetate (ester)                                                                         | 393   | 464     | 6.1   | 56053-13-5 | mainlib |
|      |        | 3   | Octadecane, 1,1'-[1,3-propanediylbis(oxy)]bis-                                                                                      | 393   | 420     | 6.1   | 17367-38-3 | mainlib |
|      |        | 4   | 5H-Cyclohepta[b]pyridine-3-carbonitrile, 6,7,8,9-tetrahydro-2-amino-4-(2-fluorophenyl)-                                             | 388   | 464     | 4.9   |            | mainlib |
|      |        | 5   | Corynan-17-ol, 18,19-didehydro-10-methoxy-                                                                                          | 380   | 444     | 3.7   | 56053-12-4 | mainlib |
|      |        | 6   | 1-(2'-Chloro-5'-sulfophenyl)-3-methyl-5-pyrazolone                                                                                  | 371   | 436     | 2.7   | 88-76-6    | mainlib |
|      |        | 7   | 2,3,4,5,7-Pentaaza-13-oxa-16-thiatetracyclo[7.7.0.0(2.6).0(10.15)]hexadeca-1(9), 3,5,10(15)-tetraen-8-one, 7-benzyl-12,12-dimethyl- | 368   | 451     | 2.4   |            | mainlib |
|      |        | 8   | 2-(tert.-Butyldimethylsilyloxybenzylidene)acetophenone                                                                              | 365   | 486     | 2.1   |            | mainlib |
|      |        | 9   | 5-Ethoxy-2-[4-(2-methoxyphenyl)-1H-pyrazol-3-yl]phenol                                                                              | 365   | 453     | 2.1   |            | mainlib |
|      |        | 10  | 1,2-Cyclobutanedicarboxamide, N,N'-diheptyl-N,N'-dimethyl-                                                                          | 364   | 433     | 2.0   | 82057-84-9 | mainlib |

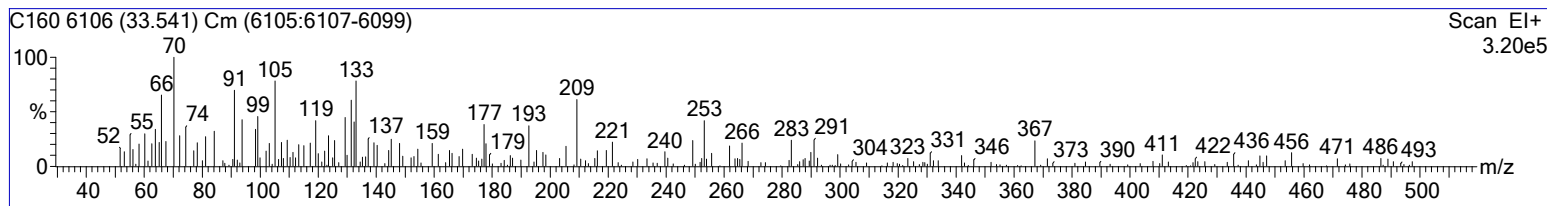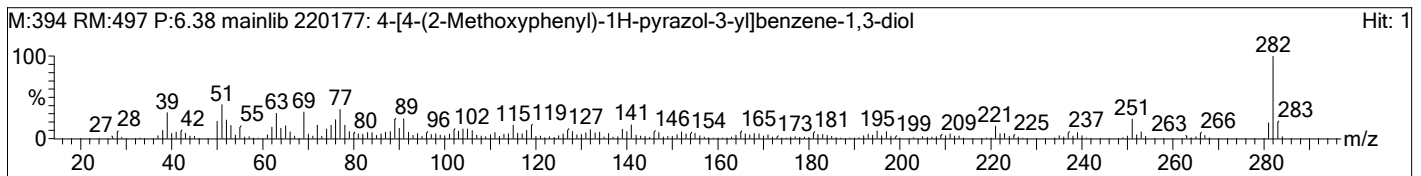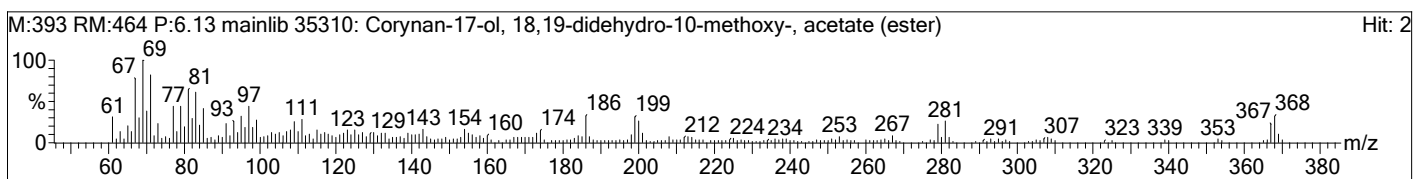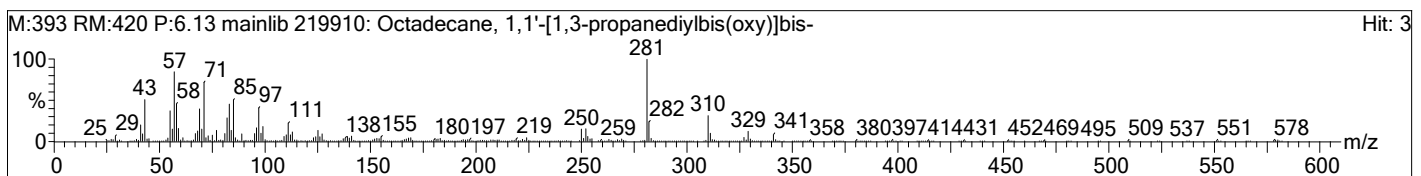

# TAMILNADU AGRICULTURAL UNIVERSITY - AGRICULTURAL MICROBIOLOGY

INSTRUMENT: PERKIN ELMER CLARUS SQ8C  
 INJECTION VOL: 1 MICRO LITER  
 SAMPLE ID : C160

COLOUMN: DB-5 MS CAPILARY STANDARD NON - POLARCOLOUMN  
 DIMENSION: 30Mts, ID: 0.25 mm, FILM: 0.25 IM CARRIER GAS: He

| #  | RT     | Scan | Height    | Area      | Area % | Norm % |
|----|--------|------|-----------|-----------|--------|--------|
| 20 | 33.606 | 6119 | 9,324,453 | 568,830.8 | 1.190  | 21.74  |

| Pk # | RT     | Hit | Compound Name                                                                                                                                                               | Match | R.Match | Prob. | CAS        | Library   |
|------|--------|-----|-----------------------------------------------------------------------------------------------------------------------------------------------------------------------------|-------|---------|-------|------------|-----------|
| 20   | 33.606 | 1   | Methyl 9,11,13-octadecatrienoate, adduct with 1-methyl-1,3,4-triazolin-2,5-dione                                                                                            | 386   | 460     | 8.7   |            | mainlib   |
|      |        | 2   | 1,8-Dioxa-5-thiaoctane, 8-(9-borabicyclo[3.3.1]non-9-yl)-3-(9-borabicyclo[3.3.1]non-9-yloxy)-1-phenyl-                                                                      | 370   | 437     | 5.0   |            | mainlib   |
|      |        | 3   | Benz[e]azulene-3,8-dione, 3a,4,6a,7,9,10,10a,10b-octahydro-3a,10a-dihydroxy-5-(hydroxymethyl)-7-(1-hydroxy-1-methylethyl)-2,10-dimethyl-, [3aR-(3aà,6aà,7à,10á,10aá,10bá)]- | 366   | 473     | 4.2   | 77590-91-1 | mainlib   |
|      |        | 4   | Ethyl 5-((3-cyano-4-(methoxymethyl)-6-methylpyridin-2-yl)sulfanyl)methyl)-1,2-oxazole-3-carboxylate                                                                         | 366   | 448     | 4.2   |            | mainlib   |
|      |        | 5   | Cyclohexanecarboxamide, N-furfuryl-                                                                                                                                         | 362   | 541     | 3.5   | 6341-32-8  | mainlib   |
|      |        | 6   | Benz[e]azulene-3,8-dione, 3a,4,6a,7,9,10,10a,10b-octahydro-3a,10a-dihydroxy-5-(hydroxymethyl)-2,10-dimethyl-, (3aà,6aà,10á,10aá,10bá)-(+)-                                  | 358   | 459     | 3.0   | 25578-89-6 | mainlib   |
|      |        | 7   | 5-Cyano-4(4-methoxyphenyl)-2-(4-methylaminobutyl)-6-anilinopyrimidine                                                                                                       | 358   | 412     | 3.0   |            | mainlib   |
|      |        | 8   | Deuteroporphyrin IX                                                                                                                                                         | 356   | 411     | 2.8   | 448-65-7   | nist_msms |
|      |        | 9   | Pregn-5-en-20-one, 12-(acetyloxy)-3,8,14-trihydroxy-, (3á,12á,14á)-                                                                                                         | 353   | 409     | 2.5   | 55955-56-1 | mainlib   |
|      |        | 10  | Deuteroporphyrin IX                                                                                                                                                         | 353   | 407     | 2.8   | 448-65-7   | nist_msms |

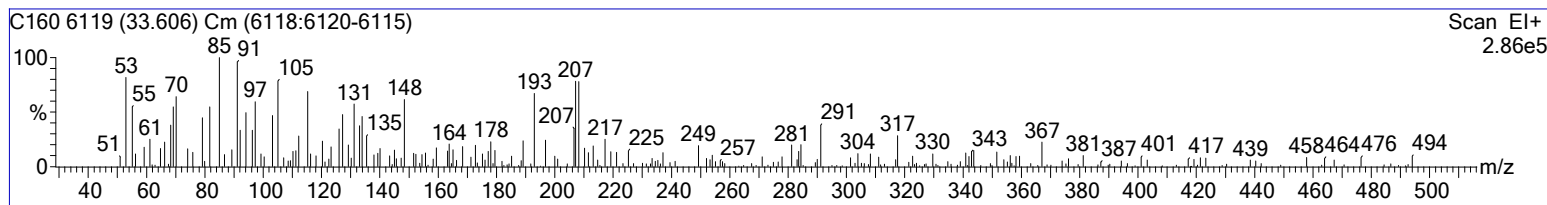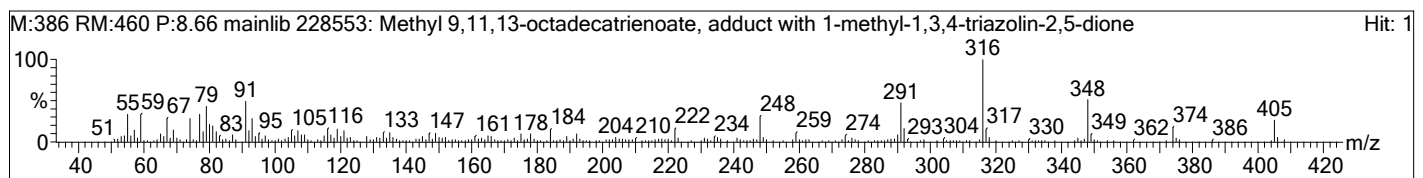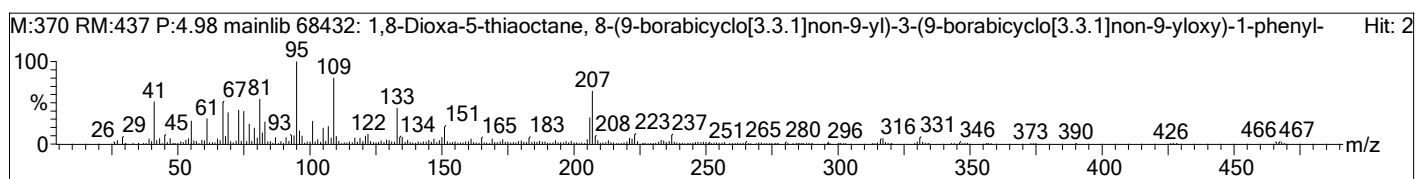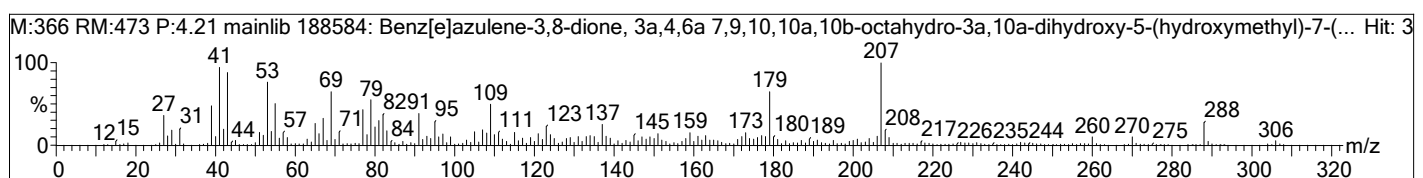

# TAMILNADU AGRICULTURAL UNIVERSITY - AGRICULTURAL MICROBIOLOGY

INSTRUMENT: PERKIN ELMER CLARUS SQ8C  
 INJECTION VOL: 1 MICRO LITER  
 SAMPLE ID : C160

COLOUMN: DB-5 MS CAPILARY STANDARD NON - POLARCOLOUMN  
 DIMENSION: 30Mts, ID: 0.25 mm, FILM: 0.25 IM CARRIER GAS: He

| #  | RT     | Scan | Height    | Area      | Area % | Norm % |
|----|--------|------|-----------|-----------|--------|--------|
| 21 | 33.686 | 6135 | 9,527,371 | 269,478.8 | 0.564  | 10.30  |

| Pk # | RT     | Hit | Compound Name                                                                                        | Match | R.Match | Prob. | CAS         | Library |
|------|--------|-----|------------------------------------------------------------------------------------------------------|-------|---------|-------|-------------|---------|
| 21   | 33.686 | 1   | 9,19-Cyclolanostan-3-ol, 24,24-epoxymethano-, acetate                                                | 392   | 415     | 17.3  |             | mainlib |
|      |        | 2   | 9,19-Cyclo-25,26-epoxyergostan-3-ol, 4,4,14-trimethyl-, acetate                                      | 366   | 394     | 5.2   |             | mainlib |
|      |        | 3   | Bicyclo[5.3.0]decan-2-one, 9-(diphenylmethylene)-                                                    | 358   | 434     | 3.9   | 345938-61-6 | mainlib |
|      |        | 4   | Benzoic acid, 3,5-dicyclohexyl-4-hydroxy-, methyl ester                                              | 357   | 434     | 3.7   | 55125-23-0  | mainlib |
|      |        | 5   | Ethyl 5-(((3-cyano-4-(methoxymethyl)-6-methylpyridin-2-yl)sulfanyl)methyl)-1,2-oxazole-3-carboxylate | 350   | 418     | 2.8   |             | mainlib |
|      |        | 6   | Spirostan-12-one, 3-hydroxy-, (3á,5à,25R)-                                                           | 350   | 382     | 2.8   | 467-55-0    | mainlib |
|      |        | 7   | Sarreroside                                                                                          | 346   | 421     | 2.4   |             | mainlib |
|      |        | 8   | Allo-cassaic acid methyl ester                                                                       | 346   | 411     | 2.4   | 2209-01-0   | mainlib |
|      |        | 9   | 8-Amino-5-[3-chlorophenylthio]-6-methoxyquinoline                                                    | 344   | 421     | 2.2   | 64895-56-3  | mainlib |
|      |        | 10  | Cholest-4-ene, 3á-(methoxymethoxy)-                                                                  | 344   | 367     | 2.2   | 4707-85-1   | mainlib |

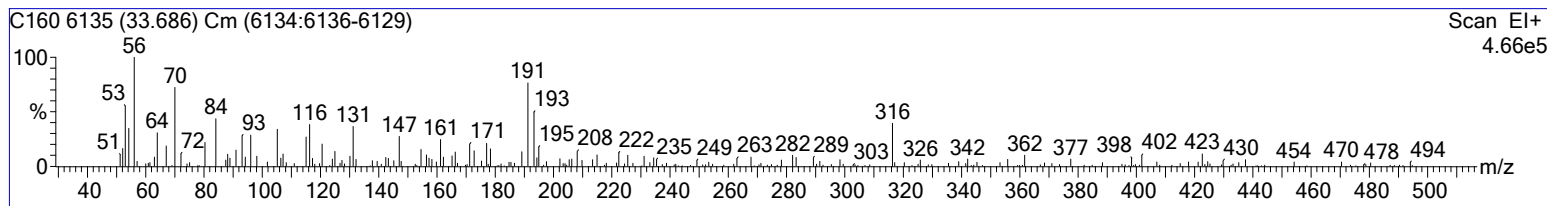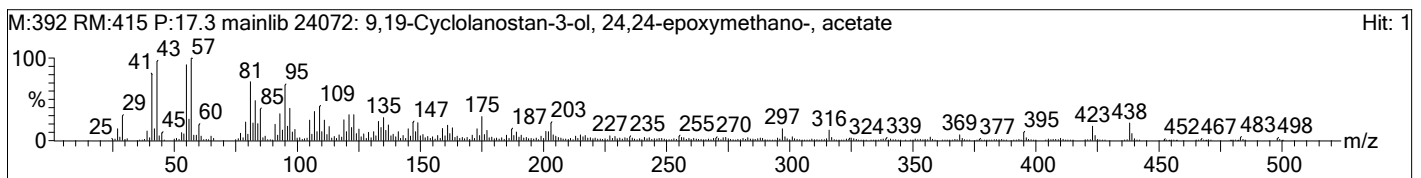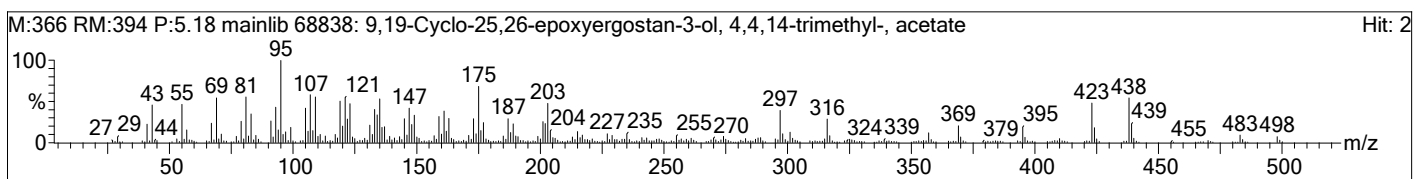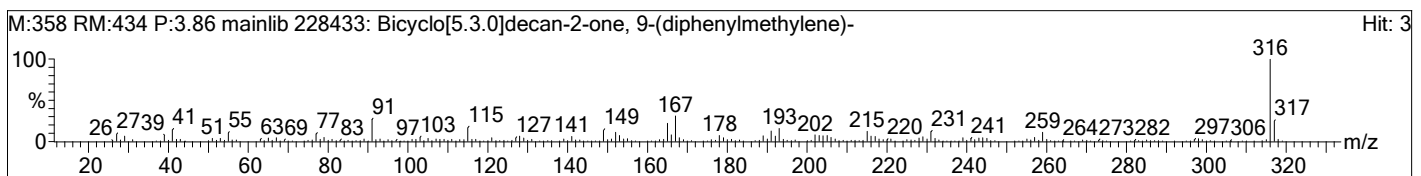

# TAMILNADU AGRICULTURAL UNIVERSITY - AGRICULTURAL MICROBIOLOGY

INSTRUMENT: PERKIN ELMER CLARUS SQ8C  
 INJECTION VOL: 1 MICRO LITER  
 SAMPLE ID : C160

COLOUMN: DB-5 MS CAPILARY STANDARD NON - POLARCOLOUMN  
 DIMENSION: 30Mts, ID: 0.25 mm, FILM: 0.25 IM CARRIER GAS: He

| #  | RT     | Scan | Height     | Area      | Area % | Norm % |
|----|--------|------|------------|-----------|--------|--------|
| 22 | 33.721 | 6142 | 11,419,108 | 566,454.1 | 1.185  | 21.65  |

| Pk # | RT     | Hit | Compound Name                                                                                                                                                                                                          | Match | R.Match | Prob. | CAS        | Library |
|------|--------|-----|------------------------------------------------------------------------------------------------------------------------------------------------------------------------------------------------------------------------|-------|---------|-------|------------|---------|
| 22   | 33.721 | 1   | Acetic acid, 17-(4-hydroxy-5-methoxy-1,5-dimethylhexyl)-4,4,10,13,14-pentamethyl-2,3,4,5,6,7,10,11,12,13,14,15,16,17-tetradecahydrocyclopenta[a]phenanthryl ester                                                      | 379   | 399     | 9.4   |            | mainlib |
|      |        | 2   | Dasycarpidan-1-methanol, acetate (ester)                                                                                                                                                                               | 361   | 435     | 4.8   | 55724-48-6 | mainlib |
|      |        | 3   | Decanoic acid, 1,1a,1b,4,4a,5,7a,7b,8,9-decahydro-4a,7b-dihydroxy-3-(hydroxymethyl)-1,1,6,8-tetramethyl-5-oxo-9aH-cyclopropa[3,4]benz[1,2-e]azulene-9,9a-diyl ester, [1aR-(1aà,1bà,4aà,7aà,7bà,8a,9a,9aà)]-            | 360   | 364     | 4.7   | 24928-17-4 | replib  |
|      |        | 4   | Decanoic acid, 1,1a,1b,4,4a,5,7a,7b,8,9-decahydro-4a,7b-dihydroxy-3-(hydroxymethyl)-1,1,6,8-tetramethyl-5-oxo-9aH-cyclopropa[3,4]benz[1,2-e]azulene-9,9a-diyl ester, [1aR-(1aà,1bà,4aà,7aà,7bà,8a,9a,9aà)]-            | 357   | 374     | 4.7   | 24928-17-4 | replib  |
|      |        | 5   | Docosanoic acid, 1,2,3-propanetriyl ester                                                                                                                                                                              | 356   | 382     | 3.9   | 18641-57-1 | mainlib |
|      |        | 6   | 5H-Cyclopropa(3,4)benz(1,2-e)azulen-5-one, 1,1a-à,1b-à,4,4a,7a-à,7b,8,9,9a-decahydro-7b-à,9-à,9a-à-trihydroxy-3-hydroxymethyl-1,1,6,8-à-tetramethyl-4a-methoxy-, 9,9a-didecanoate                                      | 354   | 362     | 3.6   | 54870-24-5 | mainlib |
|      |        | 7   | Dihydromorphine, 2TMS derivative                                                                                                                                                                                       | 350   | 386     | 3.1   |            | mainlib |
|      |        | 8   | 4-Piperidineacetic acid, 1-acetyl-5-ethyl-2-[3-(2-hydroxyethyl)-1H-indol-2-yl]-à-methyl-, methyl ester                                                                                                                 | 348   | 389     | 2.8   | 55724-47-5 | mainlib |
|      |        | 9   | Decanoic acid, 1,1a,1b,4,4a,5,7a,7b,8,9-decahydro-4a,7b-dihydroxy-1,1,6,8-tetramethyl-5-oxo-3-[[[(1-oxodecyl)oxy]methyl]-9aH-cyclopropa[3,4]benz[1,2-e]azulene-9,9a-diyl ester, [1aR-(1aà,1bà,4aà,7aà,7bà,8a,9a,9aà)]- | 348   | 348     | 2.8   | 20963-94-4 | mainlib |
|      |        | 10  | 17-Pentatriacontene                                                                                                                                                                                                    | 347   | 368     | 2.7   | 6971-40-0  | mainlib |

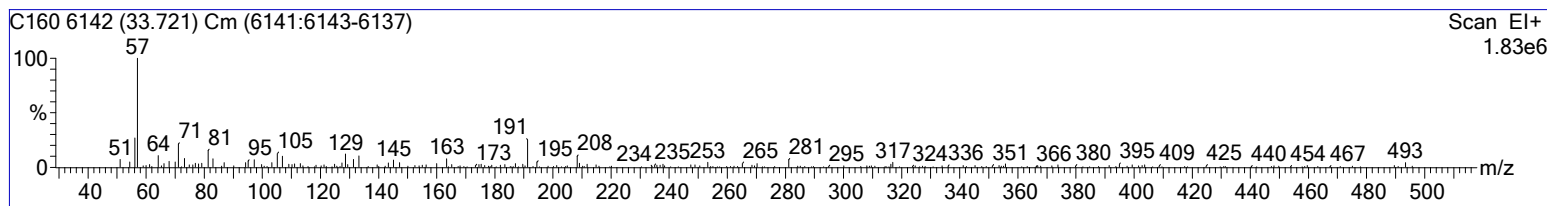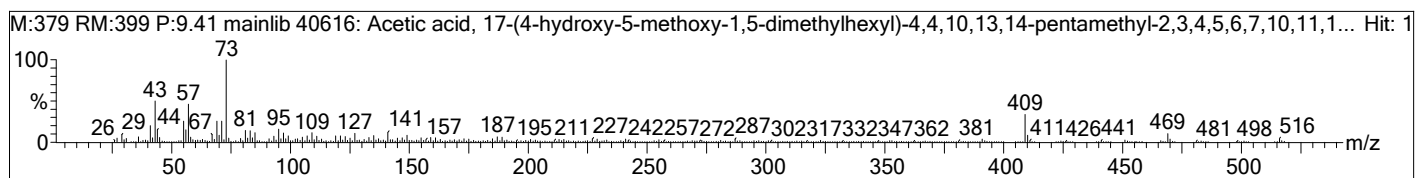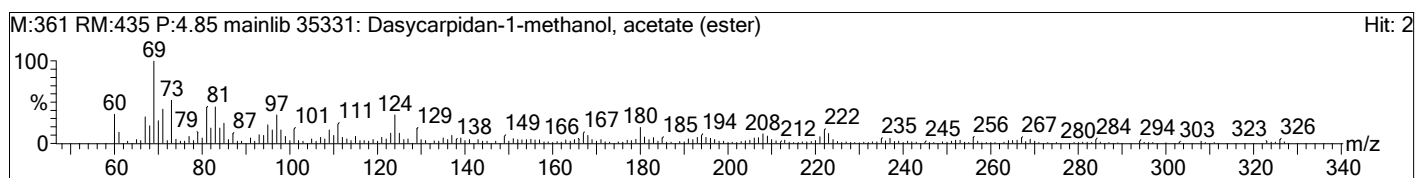

# TAMILNADU AGRICULTURAL UNIVERSITY - AGRICULTURAL MICROBIOLOGY

INSTRUMENT: PERKIN ELMER CLARUS SQ8C  
 INJECTION VOL: 1 MICRO LITER  
 SAMPLE ID : C160

COLOUMN: DB-5 MS CAPILARY STANDARD NON - POLARCOLOUMN  
 DIMENSION: 30Mts, ID: 0.25 mm, FILM: 0.25 IM CARRIER GAS: He

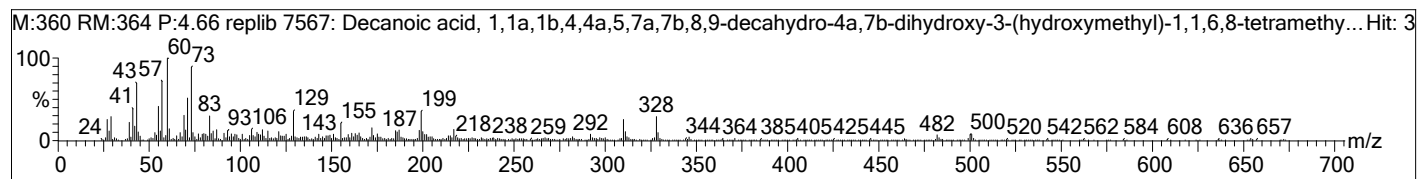

| #  | RT     | Scan | Height    | Area      | Area % | Norm % |
|----|--------|------|-----------|-----------|--------|--------|
| 23 | 33.776 | 6153 | 9,068,867 | 197,433.5 | 0.413  | 7.55   |

| Pk # | RT     | Hit | Compound Name                             | Match | R.Match | Prob. | CAS        | Library |
|------|--------|-----|-------------------------------------------|-------|---------|-------|------------|---------|
| 23   | 33.776 | 1   | Glycidyl oleate                           | 398   | 520     | 6.0   |            | mainlib |
|      |        | 2   | 22-Tricosenoic acid                       | 393   | 449     | 4.8   | 65119-95-1 | mainlib |
|      |        | 3   | 4á-Methylandrostande2,3-diol-1,17-dione   | 390   | 450     | 4.3   |            | mainlib |
|      |        | 4   | Oleic acid, eicosyl ester                 | 385   | 403     | 3.4   | 22393-88-0 | mainlib |
|      |        | 5   | cis-11-Eicosenoic acid                    | 384   | 478     | 3.3   | 5561-99-9  | mainlib |
|      |        | 6   | 2,5-Furandione, dihydro-3-octadecyl-      | 384   | 424     | 3.3   | 47458-32-2 | mainlib |
|      |        | 7   | Oleic Acid                                | 382   | 473     | 3.0   | 112-80-1   | replib  |
|      |        | 8   | 6-Octadecenoic acid, (Z)-                 | 380   | 466     | 2.8   | 593-39-5   | mainlib |
|      |        | 9   | 9-Octadecenoic acid (Z)-, octadecyl ester | 377   | 394     | 2.5   | 17673-49-3 | mainlib |
|      |        | 10  | i-Propyl 11,12-methylene-octadecanoate    | 376   | 512     | 2.4   |            | mainlib |

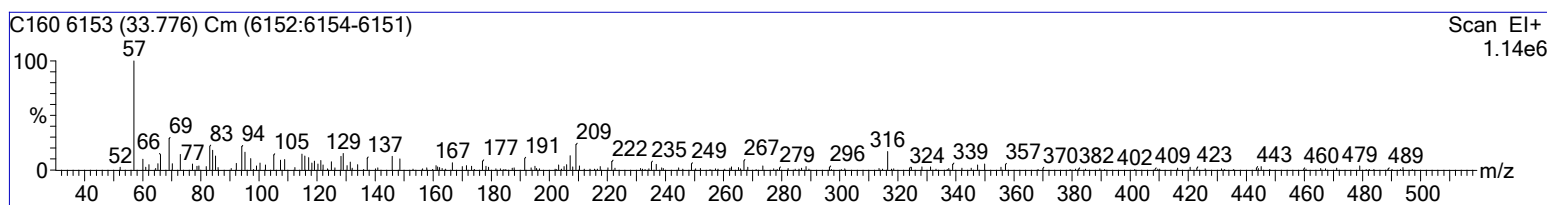

# TAMILNADU AGRICULTURAL UNIVERSITY - AGRICULTURAL MICROBIOLOGY

INSTRUMENT: PERKIN ELMER CLARUS SQ8C  
 INJECTION VOL: 1 MICRO LITER  
 SAMPLE ID : C160

COLOUMN: DB-5 MS CAPILARY STANDARD NON - POLARCOLOUMN  
 DIMENSION: 30Mts, ID: 0.25 mm, FILM: 0.25 IM CARRIER GAS: He

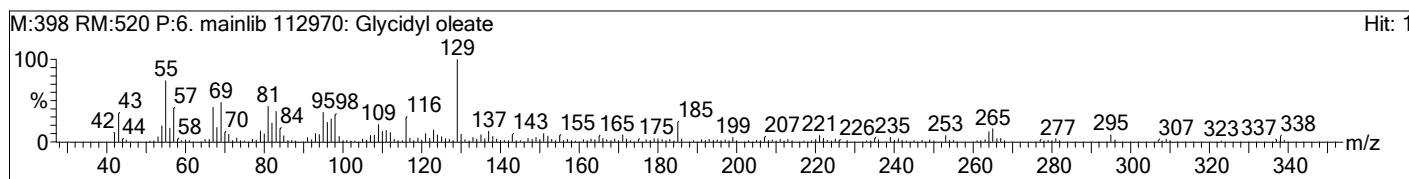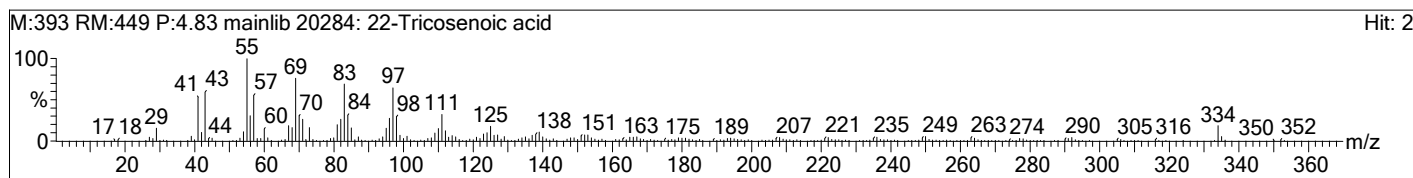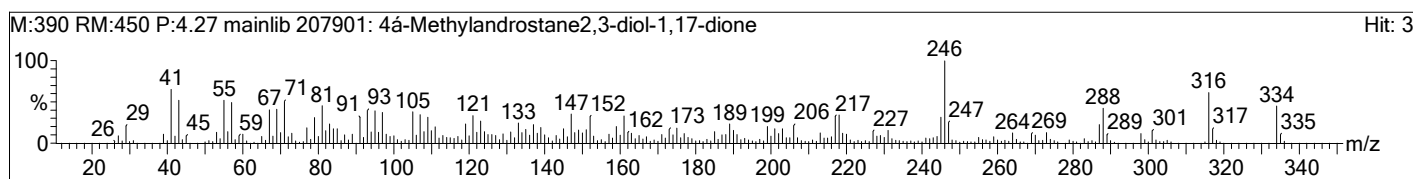

| #  | RT     | Scan | Height    | Area      | Area % | Norm % |
|----|--------|------|-----------|-----------|--------|--------|
| 24 | 33.801 | 6158 | 8,937,539 | 150,710.5 | 0.315  | 5.76   |

| Pk # | RT     | Hit | Compound Name                                                                                               | Match | R.Match | Prob. | CAS         | Library |
|------|--------|-----|-------------------------------------------------------------------------------------------------------------|-------|---------|-------|-------------|---------|
| 24   | 33.801 | 1   | Phenanthrene, 9-dodecyltetradecahydro-                                                                      | 421   | 451     | 6.2   | 55334-01-5  | replib  |
|      |        | 2   | 9,12,15-Octadecatrienoic acid, 2-phenyl-1,3-dioxan-5-yl ester                                               | 418   | 443     | 5.5   | 56700-76-6  | mainlib |
|      |        | 3   | 9,9'-Biphenanthrene, octacosahydro-                                                                         | 414   | 443     | 4.7   | 55334-18-4  | mainlib |
|      |        | 4   | Milbemycin b, 13-chloro-5-demethoxy-28-deoxy-6,28-epoxy-5-(hydroxyimino)-25-(1-methylethyl)-, (6R,13R,25R)- | 411   | 412     | 4.1   | 107024-98-6 | mainlib |
|      |        | 5   | Trilinolein                                                                                                 | 404   | 422     | 3.2   | 537-40-6    | mainlib |
|      |        | 6   | Spirostan-6-ol, 3-amino-, (3á,5á,6á,25R)-                                                                   | 401   | 437     | 2.8   | 23656-00-0  | mainlib |



# TAMILNADU AGRICULTURAL UNIVERSITY - AGRICULTURAL MICROBIOLOGY

INSTRUMENT: PERKIN ELMER CLARUS SQ8C  
 INJECTION VOL: 1 MICRO LITER  
 SAMPLE ID : C160

COLOUMN: DB-5 MS CAPILARY STANDARD NON - POLARCOLOUMN  
 DIMENSION: 30Mts, ID: 0.25 mm, FILM: 0.25 IM CARRIER GAS: He

| Pk # | RT | Hit | Compound Name                                                                                 | Match | R.Match | Prob. | CAS        | Library |
|------|----|-----|-----------------------------------------------------------------------------------------------|-------|---------|-------|------------|---------|
|      |    | 7   | 1-Hydroxy-2-(2,3,4,6-tetra-O-acetyl-beta-d-glucopyranosyl)-9H-xanthene-3,6,7-triyl triacetate | 401   | 419     | 2.8   |            | mainlib |
|      |    | 8   | Cucurbitacin B, dihydro-                                                                      | 400   | 468     | 2.7   | 13201-14-4 | mainlib |
|      |    | 9   | Anthracene, 9-dodecyltetradeca-                                                               | 399   | 446     | 2.6   | 55401-75-7 | mainlib |
|      |    | 10  | Anthracene, 9-dodecyltetradeca-                                                               | 398   | 451     | 2.6   | 55401-75-7 | replib  |

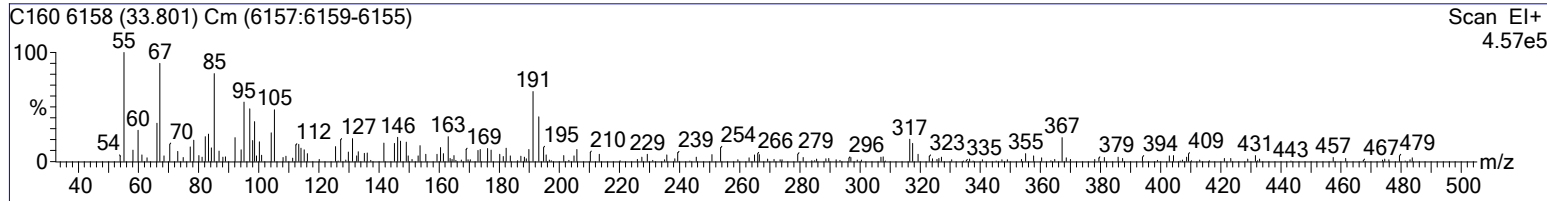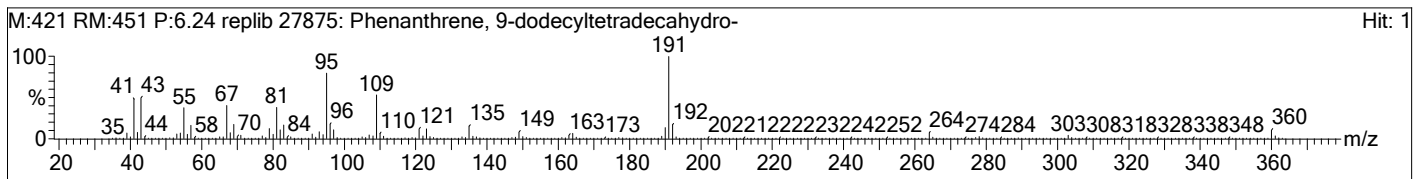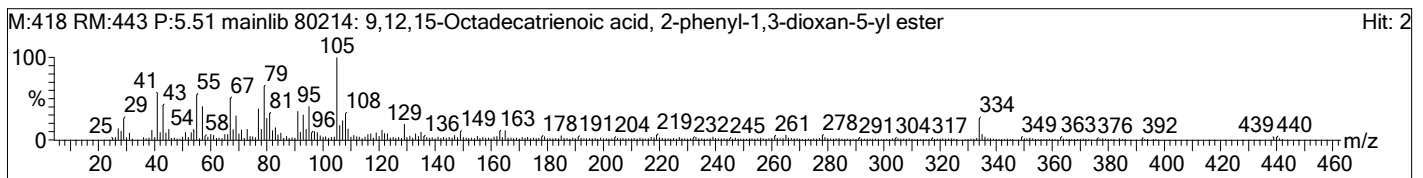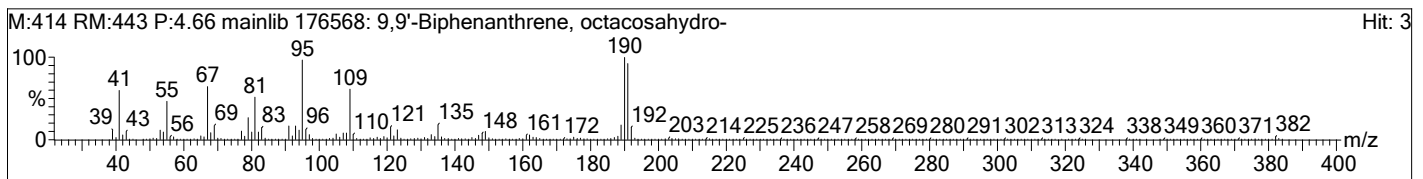

# TAMILNADU AGRICULTURAL UNIVERSITY - AGRICULTURAL MICROBIOLOGY

INSTRUMENT: PERKIN ELMER CLARUS SQ8C  
 INJECTION VOL: 1 MICRO LITER  
 SAMPLE ID : C160

COLOUMN: DB-5 MS CAPILARY STANDARD NON - POLARCOLOUMN  
 DIMENSION: 30Mts, ID: 0.25 mm, FILM: 0.25 IM CARRIER GAS: He

| #  | RT     | Scan | Height    | Area      | Area % | Norm % |
|----|--------|------|-----------|-----------|--------|--------|
| 25 | 33.821 | 6162 | 8,514,232 | 181,998.5 | 0.381  | 6.96   |

| Pk # | RT     | Hit | Compound Name                                                                                                      | Match | R.Match | Prob. | CAS        | Library |
|------|--------|-----|--------------------------------------------------------------------------------------------------------------------|-------|---------|-------|------------|---------|
| 25   | 33.821 | 1   | 4-Acetyloxyimino-6,6-dimethyl-3-methylsulfanyl-4,5,6,7-tetrahydro-benzo[c]thiophene-1-carboxylic acid methyl ester | 374   | 419     | 9.7   |            | mainlib |
|      |        | 2   | 2,6-Di-tert-butyl-4-(3-mercaptopropyl)phenol                                                                       | 363   | 473     | 6.7   | 71728-85-3 | mainlib |
|      |        | 3   | Pseudo-sarsapogenin-5,20-dien methyl ether                                                                         | 360   | 419     | 5.9   | 7604-99-1  | mainlib |
|      |        | 4   | Pseudo-sarsapogenin-5-en methyl ether                                                                              | 360   | 418     | 5.9   |            | mainlib |
|      |        | 5   | 5 $\alpha$ -Pregn-16-en-20-one, 3 $\alpha$ ,12 $\alpha$ -dihydroxy-, diacetate                                     | 357   | 379     | 5.2   | 5767-82-8  | mainlib |
|      |        | 6   | 5,12-Naphthacenedione, 8-ethyl-7,8,9,10-tetrahydro-1,6,8,11-tetrahydroxy-                                          | 354   | 419     | 4.6   | 4877-81-0  | mainlib |
|      |        | 7   | Diosgenin                                                                                                          | 352   | 422     | 4.2   | 512-04-9   | mainlib |
|      |        | 8   | Hexahydropyridine, 1-acetyl-4-[4-hydroxy-3-methoxyphenyl]-                                                         | 351   | 437     | 4.1   | 94427-40-4 | mainlib |
|      |        | 9   | Isoquinoline, 1,2,3,4-tetrahydro-5,6,7,8-tetramethoxy-                                                             | 339   | 414     | 2.7   | 82261-00-5 | mainlib |
|      |        | 10  | (6,6-Dimethoxy-3a,6a-dimethyl-2-oxooctahydrocyclopenta[b]pyrrol-3-yl)acetic acid, methyl ester                     | 337   | 422     | 2.5   |            | mainlib |

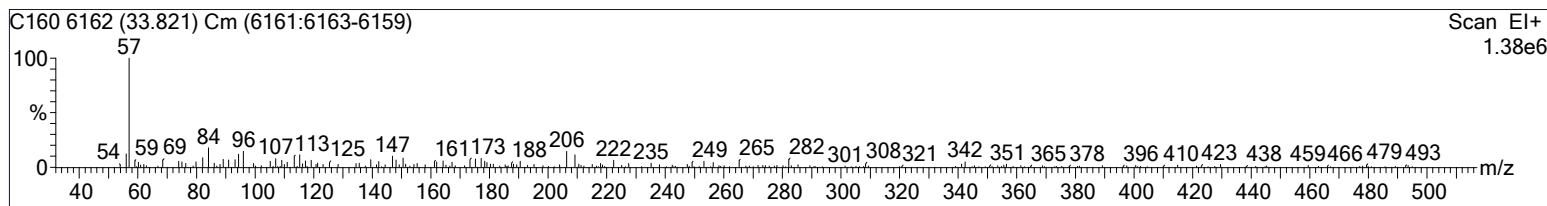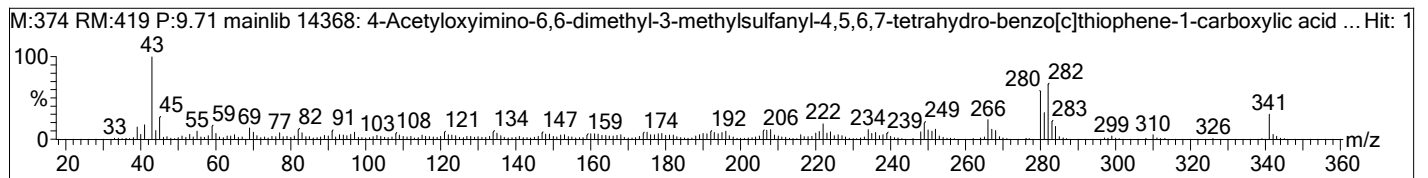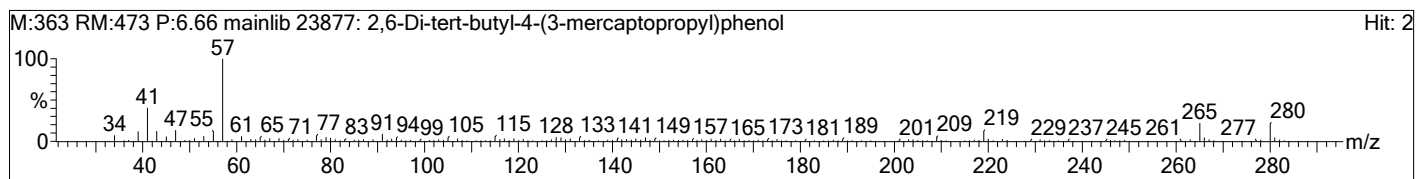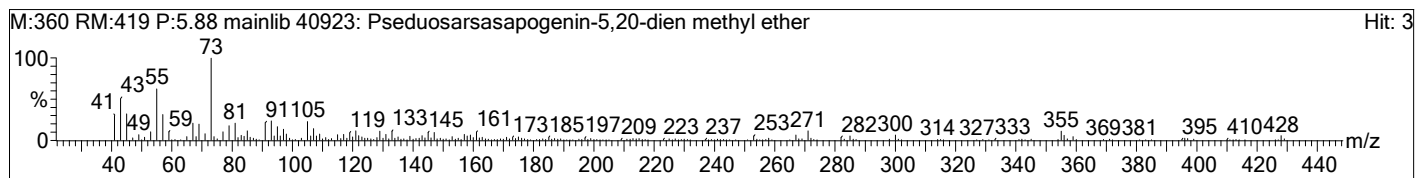

# TAMILNADU AGRICULTURAL UNIVERSITY - AGRICULTURAL MICROBIOLOGY

INSTRUMENT: PERKIN ELMER CLARUS SQ8C  
 INJECTION VOL: 1 MICRO LITER  
 SAMPLE ID : C160

COLOUMN: DB-5 MS CAPILARY STANDARD NON - POLARCOLOUMN  
 DIMENSION: 30Mts, ID: 0.25 mm, FILM: 0.25 IM CARRIER GAS: He

| #  | RT     | Scan | Height    | Area      | Area % | Norm % |
|----|--------|------|-----------|-----------|--------|--------|
| 26 | 33.851 | 6168 | 9,400,841 | 199,050.9 | 0.416  | 7.61   |

| PK # | RT     | Hit | Compound Name                                                                                                      | Match | R.Match | Prob. | CAS         | Library   |
|------|--------|-----|--------------------------------------------------------------------------------------------------------------------|-------|---------|-------|-------------|-----------|
| 26   | 33.851 | 1   | 9,12-Octadecadienoic acid, 2-phenyl-1,3-dioxan-5-yl ester, cis-                                                    | 381   | 393     | 8.5   | 56687-50-4  | mainlib   |
|      |        | 2   | N-(2-Phenylethyl)undeca-(2Z,4E)-diene-8,10-dynamide                                                                | 368   | 459     | 5.5   | 99615-80-2  | mainlib   |
|      |        | 3   | 7,7-Dimethoxy-2,3,4,5,6,7-hexahydro-1H-cyclopenta[a]pentalene                                                      | 364   | 489     | 4.6   | 58866-66-3  | mainlib   |
|      |        | 4   | Leukotriene C4                                                                                                     | 351   | 514     | 3.0   | 72025-60-6  | nist_msms |
|      |        | 5   | Aspidospermidine-3-carboxylic acid, 6,7-didehydro-3,4-dihydroxy-16-methoxy-, methyl ester, (2á,3á,4á,5á,12á,1 9à)- | 351   | 387     | 3.0   | 101043-53-2 | mainlib   |
|      |        | 6   | Cholest-2-en-1-ol                                                                                                  | 350   | 402     | 2.9   |             | mainlib   |
|      |        | 7   | Acetic acid, 8,9-dichloro-2-oxa-6-thia-adamantan-4-yl ester                                                        | 349   | 429     | 2.8   |             | mainlib   |
|      |        | 8   | Ethanone, 2-(5-methoxy-1-methyl-2-benzimidazolyl)thio-1-phenyl-                                                    | 347   | 497     | 2.5   | 302929-97-1 | mainlib   |
|      |        | 9   | 9-Oxo-15S-hydroxy-5Z,8(12),13E,17Z-prostatetraenoic acid                                                           | 345   | 510     | 2.3   | 36614-32-1  | nist_msms |
|      |        | 10  | Allocholesterol                                                                                                    | 341   | 385     | 2.0   | 517-10-2    | mainlib   |

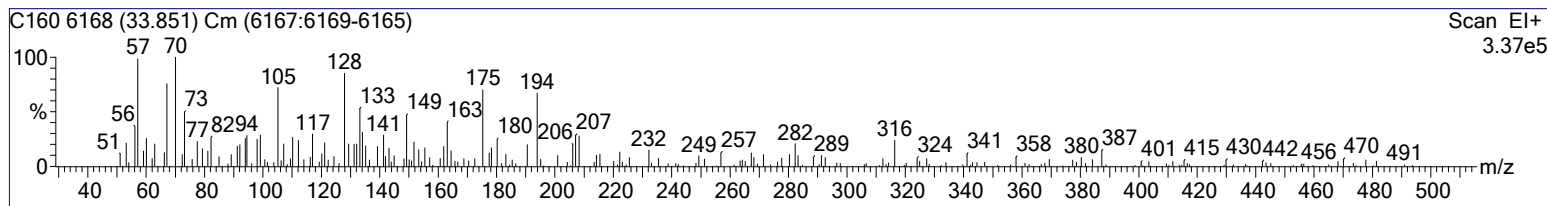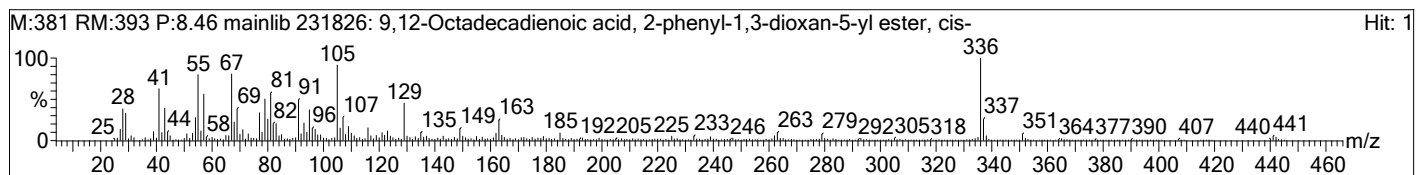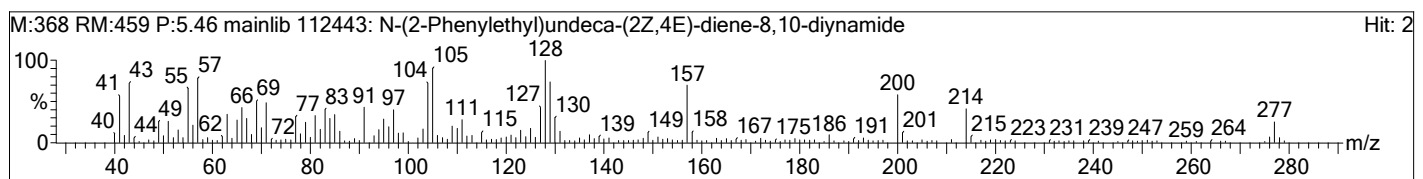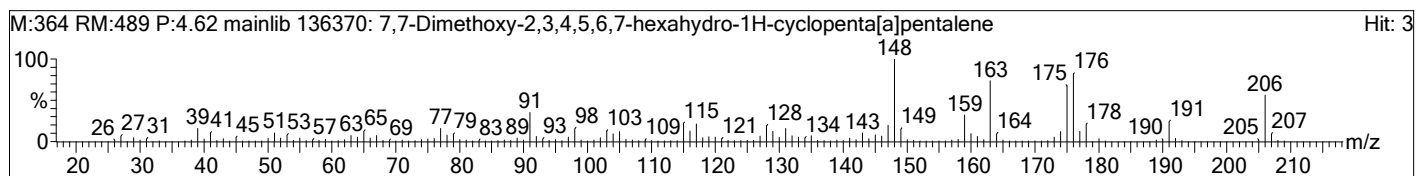

# TAMILNADU AGRICULTURAL UNIVERSITY - AGRICULTURAL MICROBIOLOGY

INSTRUMENT: PERKIN ELMER CLARUS SQ8C  
 INJECTION VOL: 1 MICRO LITER  
 SAMPLE ID : C160

COLOUMN: DB-5 MS CAPILARY STANDARD NON - POLARCOLOUMN  
 DIMENSION: 30Mts, ID: 0.25 mm, FILM: 0.25 IM CARRIER GAS: He

| #  | RT     | Scan | Height    | Area      | Area % | Norm % |
|----|--------|------|-----------|-----------|--------|--------|
| 27 | 33.886 | 6175 | 8,397,659 | 150,137.6 | 0.314  | 5.74   |

| Pk # | RT     | Hit | Compound Name                                                                                                                                     | Match | R.Match | Prob. | CAS         | Library |
|------|--------|-----|---------------------------------------------------------------------------------------------------------------------------------------------------|-------|---------|-------|-------------|---------|
| 27   | 33.886 | 1   | 3-Desoxo-3,16-dihydroxy-12-desoxyphorbol 3,13,16,20-tetraacetate                                                                                  | 394   | 424     | 8.8   |             | mainlib |
|      |        | 2   | Glycyl-L-histidyl-L-lysine acetate                                                                                                                | 377   | 441     | 4.8   | 72957-37-0  | mainlib |
|      |        | 3   | Dexamethasone-21-acetate                                                                                                                          | 374   | 388     | 4.3   | 1177-87-3   | mainlib |
|      |        | 4   | 1-Oxo-forskolin                                                                                                                                   | 369   | 459     | 3.4   |             | mainlib |
|      |        | 5   | Benzoic acid, 3,5-dicyclohexyl-4-hydroxy-, methyl ester                                                                                           | 369   | 435     | 3.4   | 55125-23-0  | mainlib |
|      |        | 6   | 2,4-Imidazolidinedione, 5-[3,4-bis(trimethylsilyloxy)phenyl]-3-methyl-5-phenyl-1-(trimethylsilyl)-                                                | 368   | 382     | 3.3   | 55517-85-6  | mainlib |
|      |        | 7   | Benz[e]azulen-3(3aH)-one, 4,6a,7,8,9,10,10a,10b-octahydro-3a,8,10a-trihydroxy-5-(hydroxymethyl)-2,10-dimethyl-, [3aR-(3aà,6aà,8á,10á,10aá,10bá)]- | 367   | 443     | 3.2   | 77573-30-9  | mainlib |
|      |        | 8   | 2,6,10,14,18,22-Tetracosahexaene, 2,6,10,15,19,23-hexamethyl-, (all-E)-, didehydro deriv.                                                         | 367   | 403     | 3.2   | 11051-27-7  | mainlib |
|      |        | 9   | 5-á-Card-20(22)-enolide, 7-á,8-epoxy-3-á,11-à,14-trihydroxy-12-oxo-                                                                               | 362   | 454     | 2.5   | 22146-03-8  | mainlib |
|      |        | 10  | Benzaldehyde, 3-nitro-, (2-methyl-6-(1-piperidyl)-pyrimid-4-yl)hydrazone                                                                          | 361   | 443     | 2.5   | 330992-55-7 | mainlib |

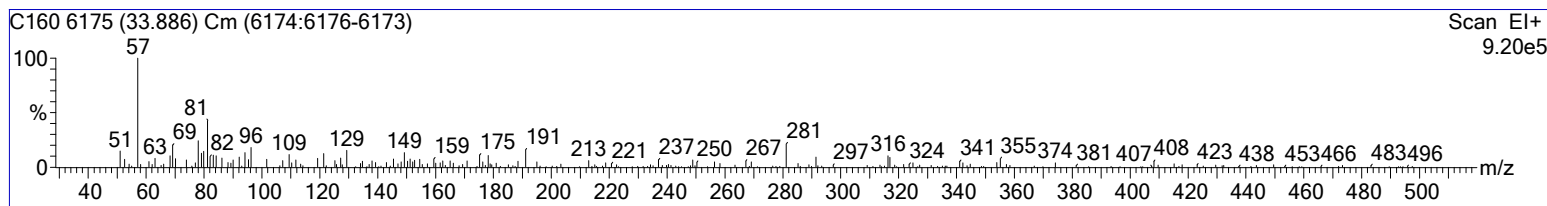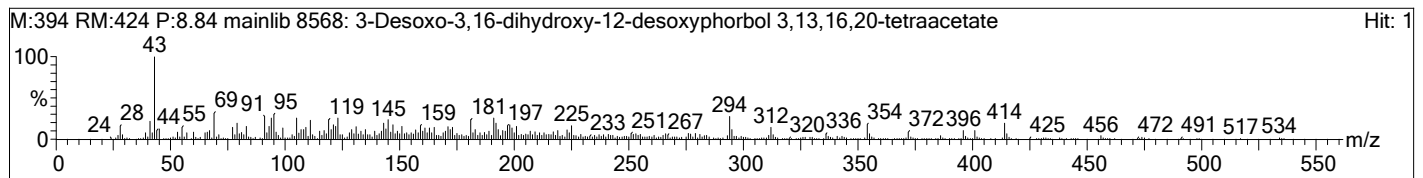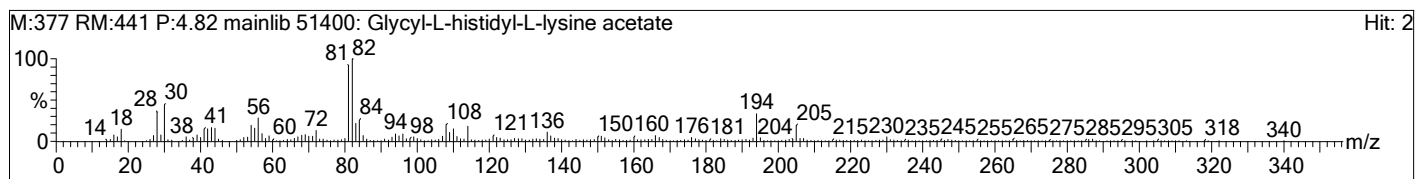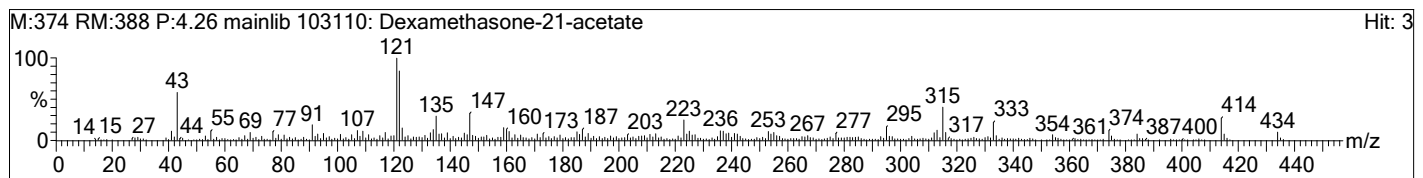

# TAMILNADU AGRICULTURAL UNIVERSITY - AGRICULTURAL MICROBIOLOGY

INSTRUMENT: PERKIN ELMER CLARUS SQ8C  
 INJECTION VOL: 1 MICRO LITER  
 SAMPLE ID : C160

COLOUMN: DB-5 MS CAPILARY STANDARD NON - POLARCOLOUMN  
 DIMENSION: 30Mts, ID: 0.25 mm, FILM: 0.25 IM CARRIER GAS: He

| #  | RT     | Scan | Height    | Area      | Area % | Norm % |
|----|--------|------|-----------|-----------|--------|--------|
| 28 | 33.911 | 6180 | 7,196,684 | 285,180.1 | 0.597  | 10.90  |

| PK # | RT     | Hit | Compound Name                                                                                                                                                                                 | Match | R.Match | Prob. | CAS        | Library |
|------|--------|-----|-----------------------------------------------------------------------------------------------------------------------------------------------------------------------------------------------|-------|---------|-------|------------|---------|
| 28   | 33.911 | 1   | 1H-Cyclopropa[3,4]benz[1,2-e]azulene-3-carboxaldehyde, 9a-(acetyloxy)-1a,1b,4,4a,5,7a,7b,8,9,9a-decahydro-4a,7b-dihydroxy-1,1,6,8-tetramethyl-5,9-dioxo-, [1aR-(1aà,1bá,4aá,7aà,7bà,8à,9aà)]- | 381   | 409     | 9.9   | 77573-49-0 | mainlib |
|      |        | 2   | 5-Methoxy-2-[4-(4-methoxyphenyl)-1H-pyrazol-3-yl]phenol                                                                                                                                       | 372   | 478     | 7.2   |            | mainlib |
|      |        | 3   | Octadecanoic acid, 2-(octadecyloxy)ethyl ester                                                                                                                                                | 365   | 401     | 5.5   | 28843-25-6 | mainlib |
|      |        | 4   | 1H-Cyclopenta[a]phenanthrene-7-carboxylic acid, 2,3,6,7,8,9,10,11,12,13,14,15,16,17-tetradecahydro-10,13-dimethyl-3-oxo-17,2'-spiro(5-oxotetrahydrofuran)-, ethyl ester                       | 361   | 383     | 4.7   |            | mainlib |
|      |        | 5   | Aldrin                                                                                                                                                                                        | 360   | 391     | 4.5   | 309-00-2   | replib  |
|      |        | 6   | Spirost-8-en-11-one, 3-hydroxy-, (3á,5à,14á,20á,22á,25R)-                                                                                                                                     | 354   | 407     | 3.5   | 58072-54-1 | mainlib |
|      |        | 7   | Aldrin                                                                                                                                                                                        | 353   | 390     | 4.5   | 309-00-2   | replib  |
|      |        | 8   | Aldrin                                                                                                                                                                                        | 353   | 386     | 4.5   | 309-00-2   | replib  |
|      |        | 9   | 9-Ethyl-3-hydroxy-10,11b-dimethyl-1,2,3,4,6,6a,6b,7,8,9,11a,11b-dodecahydrobenzo[a]fluoren-11-one                                                                                             | 352   | 437     | 3.2   |            | mainlib |
|      |        | 10  | Aspidofractinine-1-carboxaldehyde, 17-methoxy-3-oxo-, (2à,5à)-                                                                                                                                | 351   | 398     | 3.1   | 55724-67-9 | mainlib |

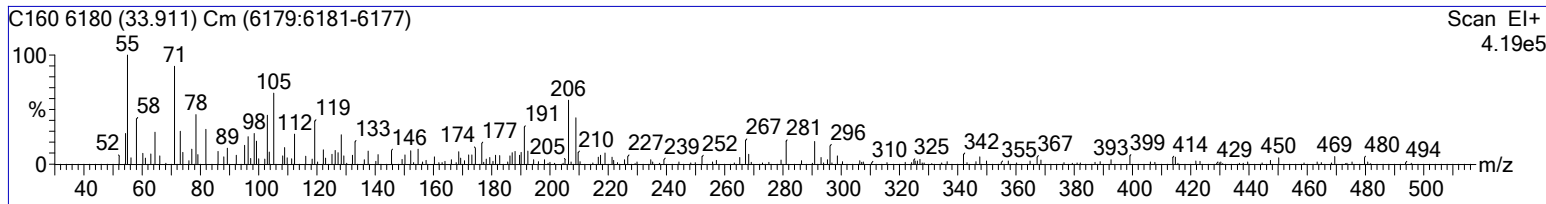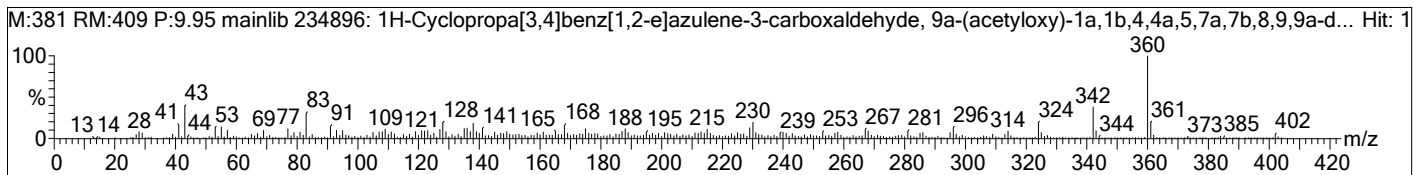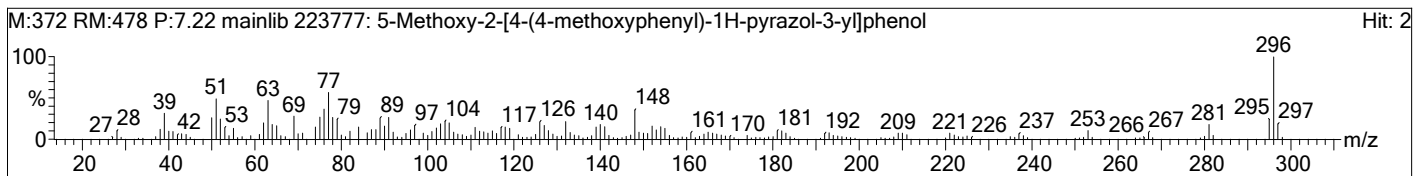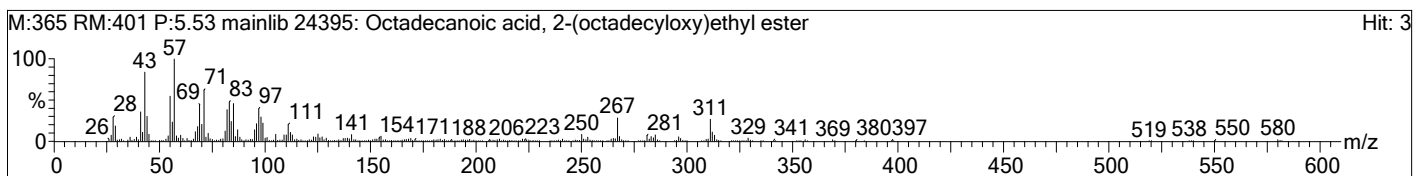

# TAMILNADU AGRICULTURAL UNIVERSITY - AGRICULTURAL MICROBIOLOGY

INSTRUMENT: PERKIN ELMER CLARUS SQ8C  
 INJECTION VOL: 1 MICRO LITER  
 SAMPLE ID : C160

COLOUMN: DB-5 MS CAPILARY STANDARD NON - POLARCOLOUMN  
 DIMENSION: 30Mts, ID: 0.25 mm, FILM: 0.25 IM CARRIER GAS: He

| #  | RT     | Scan | Height    | Area      | Area % | Norm % |
|----|--------|------|-----------|-----------|--------|--------|
| 29 | 33.981 | 6194 | 5,052,044 | 162,386.7 | 0.340  | 6.21   |

| Pk # | RT     | Hit | Compound Name                                                                                                                                                                                 | Match | R.Match | Prob. | CAS        | Library |
|------|--------|-----|-----------------------------------------------------------------------------------------------------------------------------------------------------------------------------------------------|-------|---------|-------|------------|---------|
| 29   | 33.981 | 1   | Spirost-8-en-11-one, 3-hydroxy-, (3á,5à,14á,20á,22á,25R)-                                                                                                                                     | 415   | 474     | 9.3   | 58072-54-1 | mainlib |
|      |        | 2   | Acetic acid, 17-acetoxy-4,4,10,13-tetramethyl-7-oxo-2,3,4,7,8,9,10,11,12,13,14,15,16,17-tetradecahydro-1H-cyclopenta[a]phenanthren-3-yl (ester)                                               | 405   | 424     | 6.5   |            | mainlib |
|      |        | 3   | Octadecanoic acid, 2-(octadecyloxy)ethyl ester                                                                                                                                                | 396   | 433     | 4.8   | 28843-25-6 | mainlib |
|      |        | 4   | Octadecane, 1-[2-(hexadecyloxy)ethoxy]-                                                                                                                                                       | 393   | 437     | 4.2   | 17367-10-1 | mainlib |
|      |        | 5   | Octadecanoic acid, 4-hydroxy-, methyl ester                                                                                                                                                   | 391   | 456     | 3.9   | 2420-38-4  | mainlib |
|      |        | 6   | Stearic acid, 3-(octadecyloxy)propyl ester                                                                                                                                                    | 390   | 414     | 3.7   | 17367-40-7 | mainlib |
|      |        | 7   | Thiocolchicine                                                                                                                                                                                | 389   | 444     | 3.6   |            | mainlib |
|      |        | 8   | 1H-Cyclopropa[3,4]benz[1,2-e]azulene-3-carboxaldehyde, 9a-(acetyloxy)-1a,1b,4,4a,5,7a,7b,8,9,9a-decahydro-4a,7b-dihydroxy-1,1,6,8-tetramethyl-5,9-dioxo-, [1aR-(1aà,1bá,4aá,7aà,7bà,8à,9aà)]- | 389   | 410     | 3.6   | 77573-49-0 | mainlib |
|      |        | 9   | Hexadecanoic acid, 2-(octadecyloxy)ethyl ester                                                                                                                                                | 385   | 431     | 3.0   | 29899-13-6 | mainlib |
|      |        | 10  | 9-Ethyl-3-hydroxy-10,11b-dimethyl-1,2,3,4,6,6a,6b,7,8,9,11a,11b-dodecahydrobenzo[a]fluoren-11-one                                                                                             | 384   | 447     | 2.9   |            | mainlib |

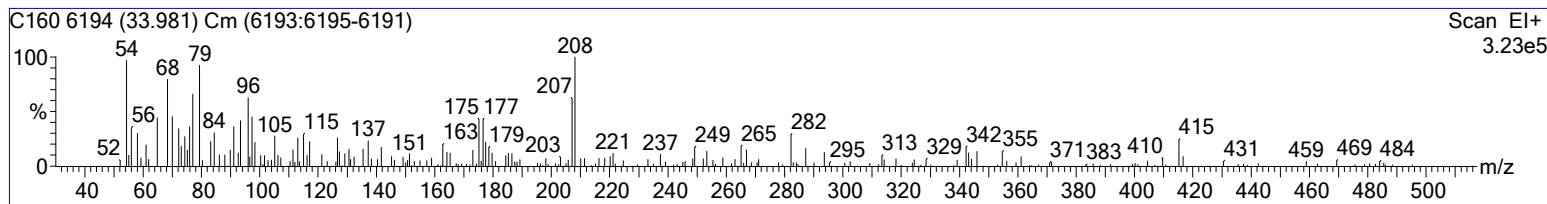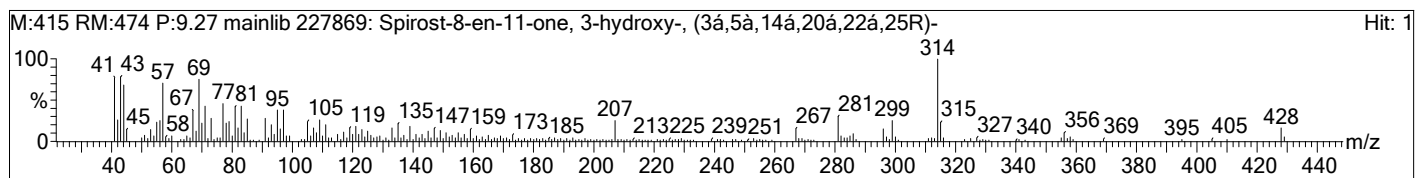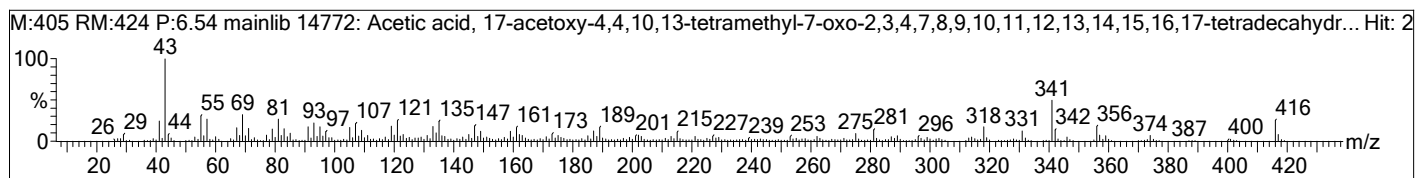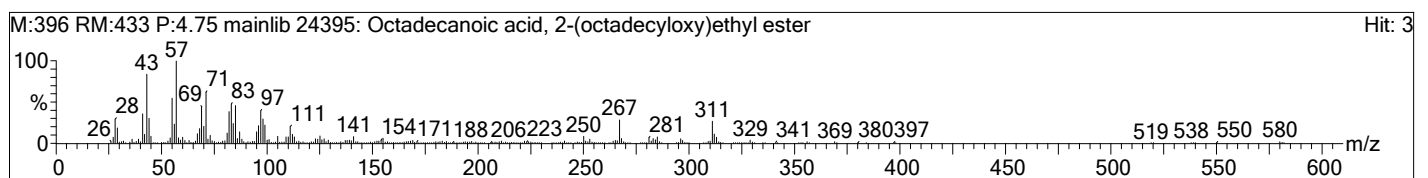

# TAMILNADU AGRICULTURAL UNIVERSITY - AGRICULTURAL MICROBIOLOGY

INSTRUMENT: PERKIN ELMER CLARUS SQ8C  
 INJECTION VOL: 1 MICRO LITER  
 SAMPLE ID : C160

COLOUMN: DB-5 MS CAPILARY STANDARD NON - POLARCOLOUMN  
 DIMENSION: 30Mts, ID: 0.25 mm, FILM: 0.25 IM CARRIER GAS: He

| #  | RT     | Scan | Height    | Area      | Area % | Norm % |
|----|--------|------|-----------|-----------|--------|--------|
| 30 | 34.126 | 6223 | 4,792,302 | 158,952.8 | 0.333  | 6.08   |

| Pk # | RT     | Hit | Compound Name                                                                                                                                                 | Match | R.Match | Prob. | CAS        | Library |
|------|--------|-----|---------------------------------------------------------------------------------------------------------------------------------------------------------------|-------|---------|-------|------------|---------|
| 30   | 34.126 | 1   | 3,8,12-Tri-O-acetoxy-7-desoxyingol-7-one                                                                                                                      | 406   | 442     | 9.5   |            | mainlib |
|      |        | 2   | 2-Nonadecanone 2,4-dinitrophenylhydrazine                                                                                                                     | 396   | 426     | 6.7   | 28813-61-8 | mainlib |
|      |        | 3   | 1-(3-Cyano-4,5,6,7-tetrahydro-2-benzo[b]thienyl)-3-(3,4-dimethoxycinnamoyl)-2-thiourea                                                                        | 393   | 525     | 5.9   |            | mainlib |
|      |        | 4   | 3,9-Epoxypregn-16-en-14-ol-20-one, 11,18-diacetoxy-3-methoxy-                                                                                                 | 393   | 407     | 5.9   |            | mainlib |
|      |        | 5   | 3-Desoxo-3,16-dihydroxy-12-desoxyphorbol 3,13,16,20-tetraacetate                                                                                              | 392   | 421     | 5.7   |            | mainlib |
|      |        | 6   | 4a,7a-Epoxy-5H-cyclopenta[a]cyclopropa[ff]cycloundecene-2,4,7,10,11-pentol, 1,1a,2,3,4,6,7,10,11,11a-decahydro-1,1,3,6,9-pentamethyl-, 2,7,10,11-tetraacetate | 386   | 412     | 4.5   | 51950-35-7 | mainlib |
|      |        | 7   | Dihydromorphine, 2TMS derivative                                                                                                                              | 383   | 411     | 4.0   |            | mainlib |
|      |        | 8   | 9-Desoxo-9-x-acetoxy-3,8,12-tri-O-acetylingol                                                                                                                 | 380   | 416     | 3.5   |            | mainlib |
|      |        | 9   | 9-Desoxo-9-x-acetoxy-3-desoxy-7.8.12-tri-O-acetylingol-3-one                                                                                                  | 377   | 416     | 3.1   |            | mainlib |
|      |        | 10  | 7,8,12-Tri-O-acetyl-3-desoxy-ingol-3-one                                                                                                                      | 377   | 395     | 3.1   |            | mainlib |

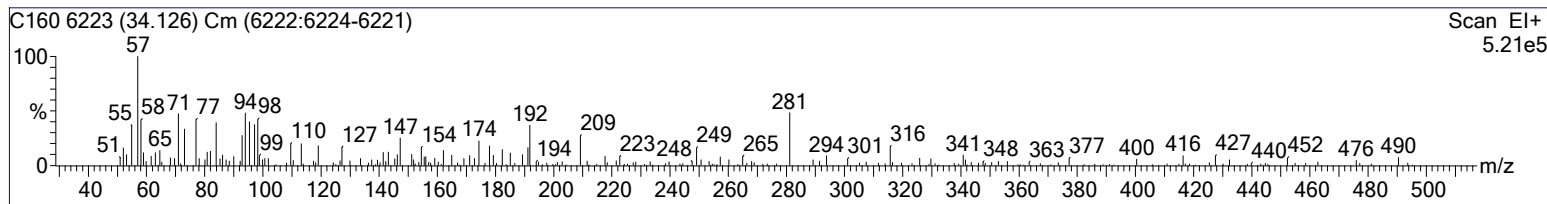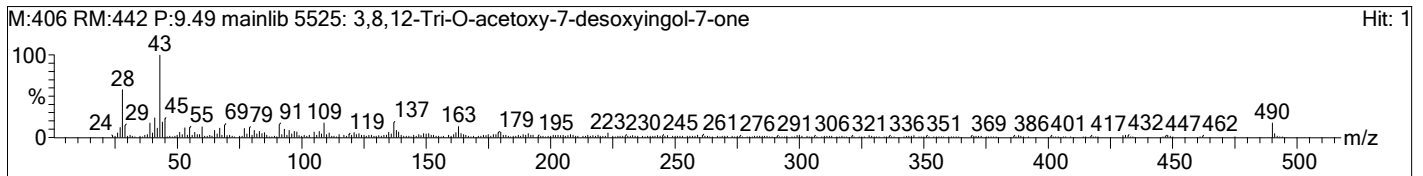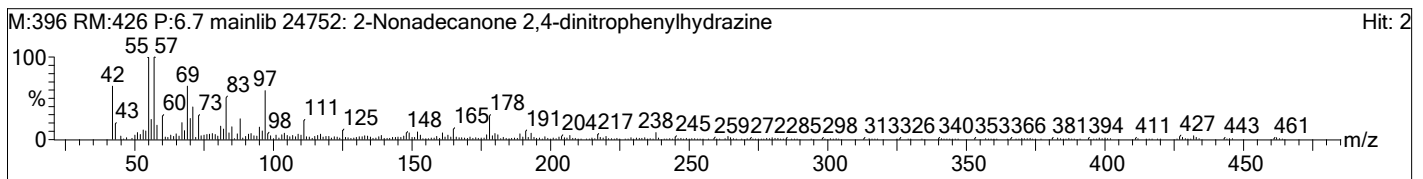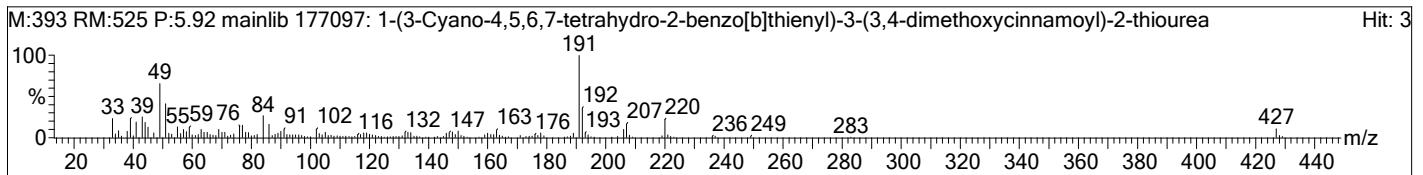

Supplement: pone.0219014.s008.pdf [file pone.0219014.s008.pdf]
