# Supplementary material for: Enhancement of disease resistance, growth potential, and photosynthesis in tomato (Solanum lycopersicum) by inoculation with an endophytic actinobacterium, Streptomyces thermocarboxydus strain BPSAC147
Source: PubMed Central journal article supplement (PMC6608948; doi:10.1371/journal.pone.0219014), 2019-07-03

# TAMILNADU AGRICULTURAL UNIVERSITY - AGRICULTURAL MICROBIOLOGY

INSTRUMENT: PERKIN ELMER CLARUS SQ8C  
 INJECTION VOL: 1 MICRO LITER  
 SAMPLE ID : T160

COLOUMN: DB-5 MS CAPILARY STANDARD NON - POLARCOLOUMN  
 DIMENSION: 30Mts, ID: 0.25 mm, FILM: 0.25 IM CARRIER GAS: He

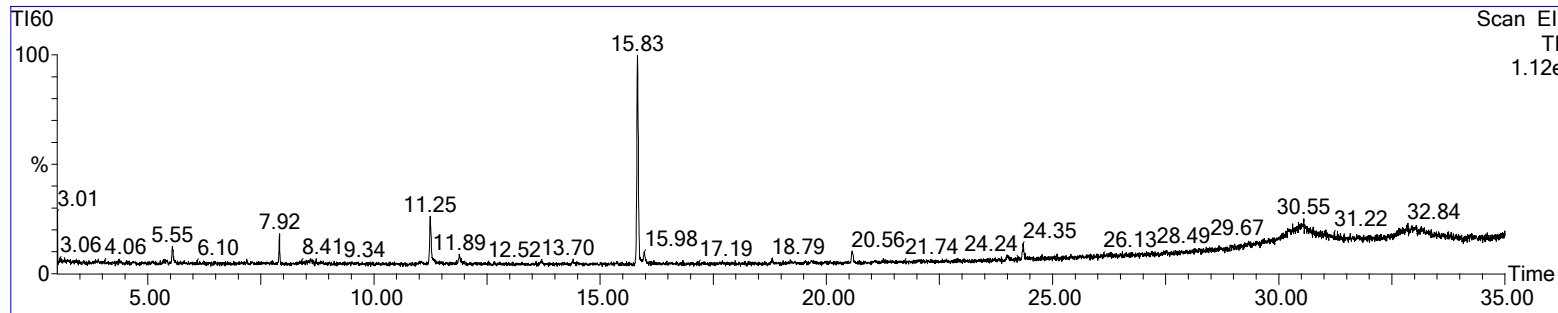

| # | RT    | Scan | Height    | Area      | Area % | Norm % |
|---|-------|------|-----------|-----------|--------|--------|
| 1 | 5.549 | 510  | 9,568,335 | 400,684.2 | 0.643  | 9.31   |

| PK # | RT    | Hit | Compound Name                       | Match | R.Match | Prob. | CAS        | Library |
|------|-------|-----|-------------------------------------|-------|---------|-------|------------|---------|
| 1    | 5.549 | 1   | Benzaldehyde, 4-methyl-             | 659   | 909     | 24.9  | 104-87-0   | replib  |
|      |       | 2   | Benzaldehyde, 4-methyl-             | 653   | 916     | 24.9  | 104-87-0   | replib  |
|      |       | 3   | Benzaldehyde, 2-methyl-             | 649   | 909     | 17.5  | 529-20-4   | mainlib |
|      |       | 4   | Benzaldehyde, 4-methyl-             | 647   | 914     | 24.9  | 104-87-0   | mainlib |
|      |       | 5   | Benzaldehyde, 3-methyl-             | 643   | 897     | 13.8  | 620-23-5   | replib  |
|      |       | 6   | Benzaldehyde, 2-methyl-             | 642   | 903     | 17.5  | 529-20-4   | replib  |
|      |       | 7   | Benzaldehyde, 4-methyl-             | 641   | 917     | 24.9  | 104-87-0   | replib  |
|      |       | 8   | Benzaldehyde, 3-methyl-             | 640   | 915     | 13.8  | 620-23-5   | replib  |
|      |       | 9   | Benzaldehyde, 4-methyl-             | 637   | 901     | 24.9  | 104-87-0   | replib  |
|      |       | 10  | Bicyclo[4.2.0]octa-1,3,5-trien-7-ol | 635   | 878     | 10.3  | 35447-99-5 | mainlib |

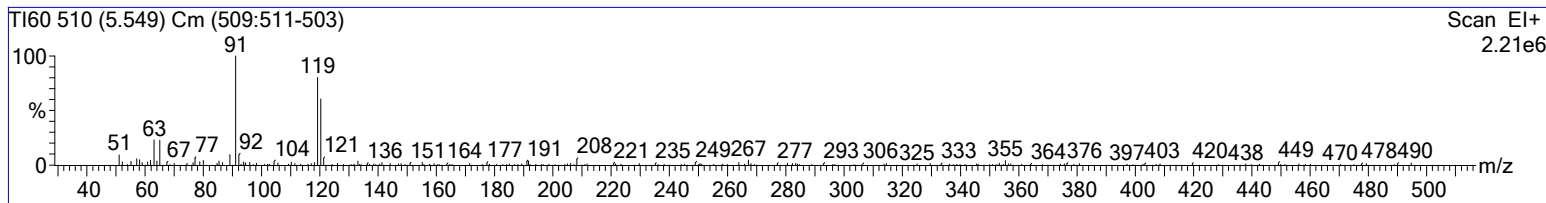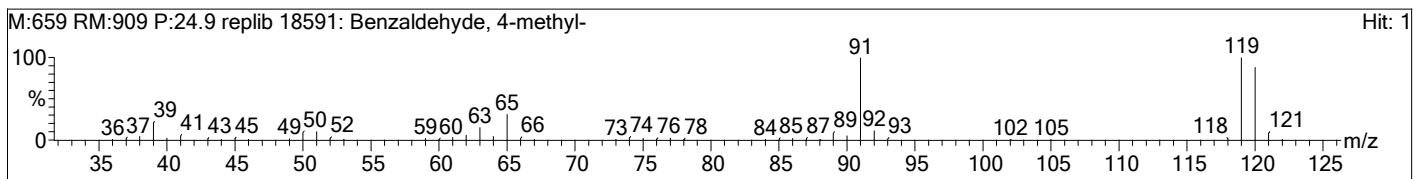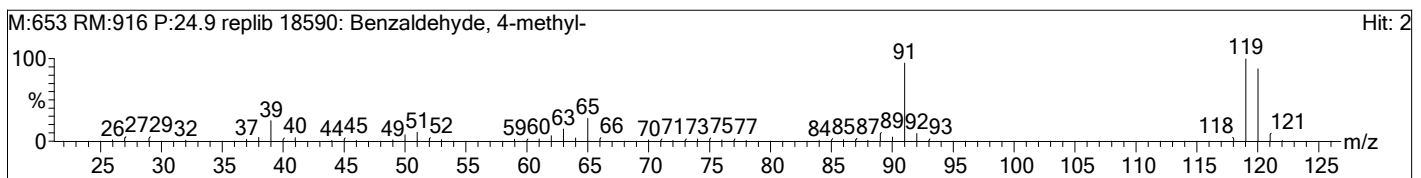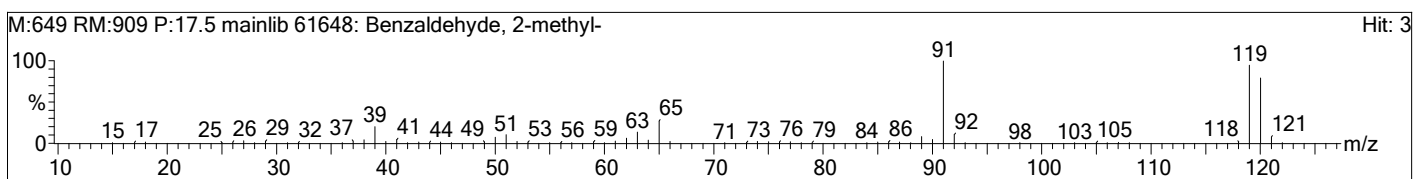

# TAMILNADU AGRICULTURAL UNIVERSITY - AGRICULTURAL MICROBIOLOGY

INSTRUMENT: PERKIN ELMER CLARUS SQ8C  
 INJECTION VOL: 1 MICRO LITER  
 SAMPLE ID : T160

COLOUMN: DB-5 MS CAPILARY STANDARD NON - POLARCOLOUMN  
 DIMENSION: 30Mts, ID: 0.25 mm, FILM: 0.25 IM CARRIER GAS: He

| # | RT    | Scan | Height     | Area      | Area % | Norm % |
|---|-------|------|------------|-----------|--------|--------|
| 2 | 7.920 | 984  | 16,136,184 | 405,135.5 | 0.650  | 9.41   |

| Pk # | RT    | Hit | Compound Name                                 | Match | R.Match | Prob. | CAS        | Library |
|------|-------|-----|-----------------------------------------------|-------|---------|-------|------------|---------|
| 2    | 7.920 | 1   | Benzene, 1,3-bis(1,1-dimethylethyl)-          | 768   | 863     | 53.4  | 1014-60-4  | mainlib |
|      |       | 2   | Benzene, 1,3-bis(1,1-dimethylethyl)-          | 764   | 854     | 53.4  | 1014-60-4  | replib  |
|      |       | 3   | Benzene, 1,3-bis(1,1-dimethylethyl)-          | 764   | 849     | 53.4  | 1014-60-4  | replib  |
|      |       | 4   | m-Cymene, 5-tert-butyl-                       | 723   | 793     | 11.4  | 29577-19-3 | mainlib |
|      |       | 5   | Benzene, 1,4-bis(1,1-dimethylethyl)-          | 717   | 797     | 8.9   | 1012-72-2  | replib  |
|      |       | 6   | Benzene, 1,4-bis(1,1-dimethylethyl)-          | 705   | 783     | 8.9   | 1012-72-2  | mainlib |
|      |       | 7   | Benzene, 1,5-dimethyl-2,4-bis(1-methylethyl)- | 703   | 784     | 5.6   | 5186-68-5  | mainlib |
|      |       | 8   | Benzene, 1,4-dimethyl-2,5-bis(1-methylethyl)- | 696   | 766     | 4.3   | 10375-96-9 | replib  |
|      |       | 9   | Benzene, 1,4-dimethyl-2,5-bis(1-methylethyl)- | 691   | 755     | 4.3   | 10375-96-9 | replib  |
|      |       | 10  | 2,3,3,4,7-Pentamethyl-2,3-dihydro-benzofuran  | 678   | 734     | 2.2   |            | mainlib |

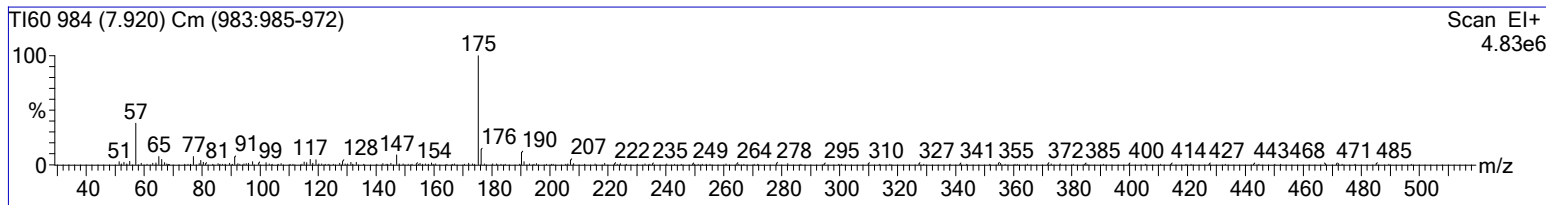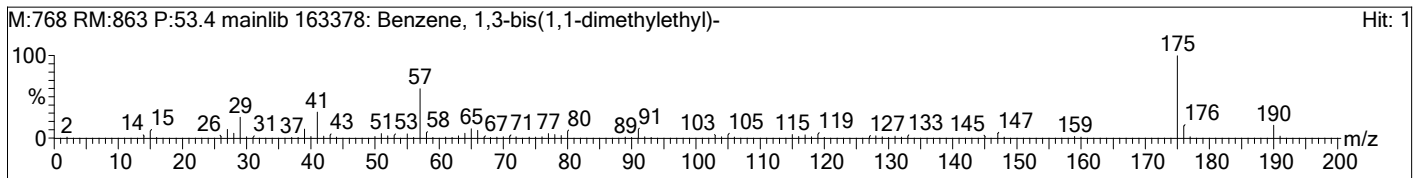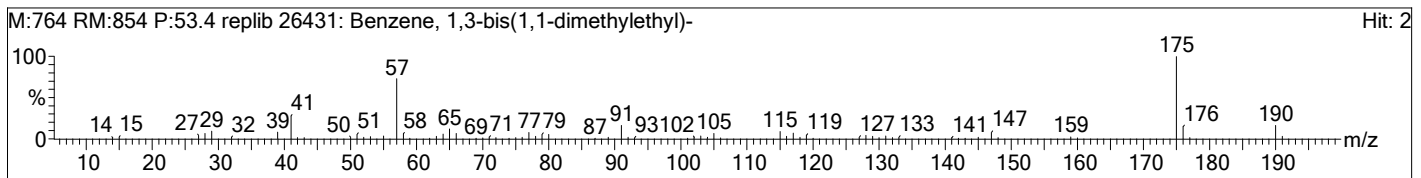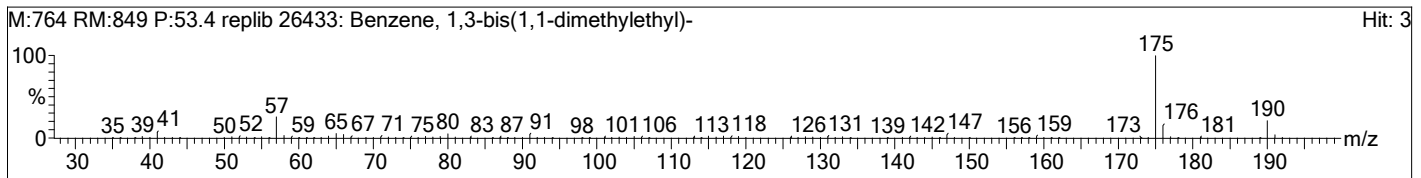

# TAMILNADU AGRICULTURAL UNIVERSITY - AGRICULTURAL MICROBIOLOGY

INSTRUMENT: PERKIN ELMER CLARUS SQ8C  
 INJECTION VOL: 1 MICRO LITER  
 SAMPLE ID : T160

COLOUMN: DB-5 MS CAPILARY STANDARD NON - POLARCOLOUMN  
 DIMENSION: 30Mts, ID: 0.25 mm, FILM: 0.25 IM CARRIER GAS: He

| # | RT     | Scan | Height     | Area        | Area % | Norm % |
|---|--------|------|------------|-------------|--------|--------|
| 3 | 11.247 | 1649 | 25,539,454 | 1,300,760.0 | 2.087  | 30.22  |

| Pk # | RT     | Hit | Compound Name        | Match | R.Match | Prob. | CAS        | Library |
|------|--------|-----|----------------------|-------|---------|-------|------------|---------|
| 3    | 11.247 | 1   | 1-Dodecanol          | 782   | 881     | 8.5   | 112-53-8   | replib  |
|      |        | 2   | 1-Dodecanol          | 775   | 863     | 8.5   | 112-53-8   | replib  |
|      |        | 3   | 1-Dodecanol          | 771   | 855     | 8.5   | 112-53-8   | replib  |
|      |        | 4   | 1-Dodecanol          | 764   | 851     | 8.5   | 112-53-8   | replib  |
|      |        | 5   | 1-Dodecanol          | 763   | 843     | 8.5   | 112-53-8   | replib  |
|      |        | 6   | 1-Undecanol          | 762   | 879     | 3.9   | 112-42-5   | mainlib |
|      |        | 7   | Cyclopropane, nonyl- | 758   | 844     | 3.3   | 74663-85-7 | mainlib |
|      |        | 8   | 1-Tetradecanol       | 754   | 812     | 2.8   | 112-72-1   | replib  |
|      |        | 9   | 1-Dodecanol          | 753   | 832     | 8.5   | 112-53-8   | replib  |
|      |        | 10  | 1-Decanol            | 751   | 855     | 2.4   | 112-30-1   | replib  |

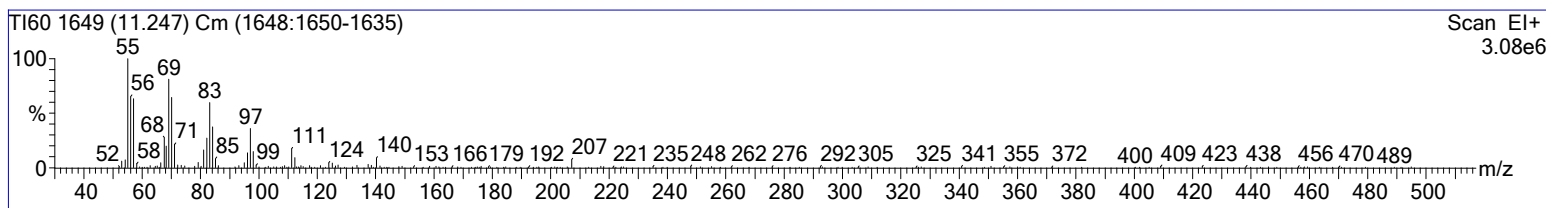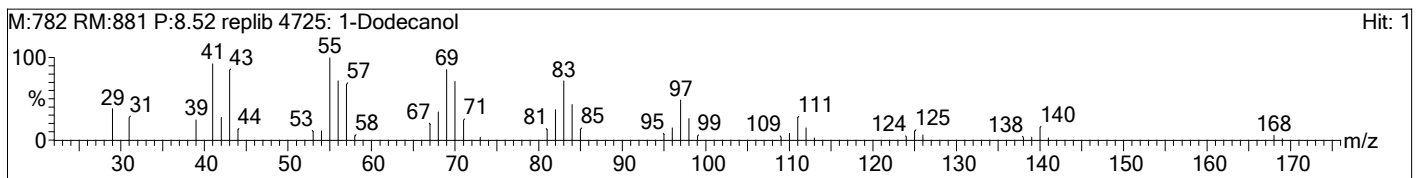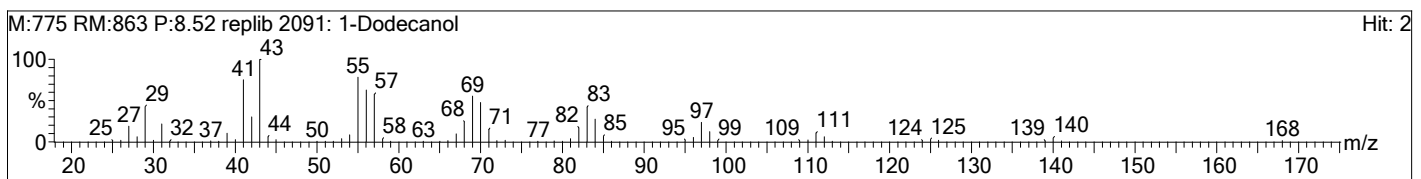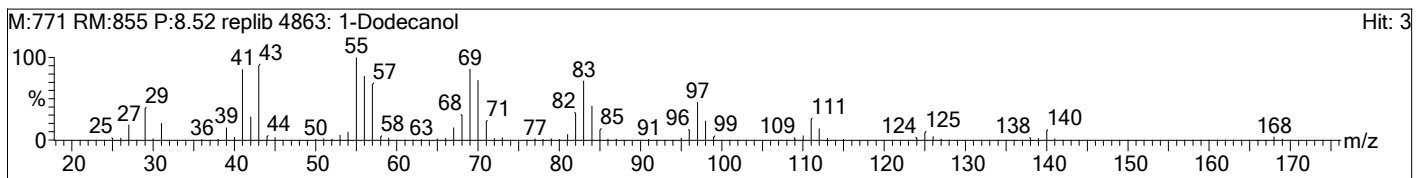

# TAMILNADU AGRICULTURAL UNIVERSITY - AGRICULTURAL MICROBIOLOGY

INSTRUMENT: PERKIN ELMER CLARUS SQ8C  
 INJECTION VOL: 1 MICRO LITER  
 SAMPLE ID : T160

COLOUMN: DB-5 MS CAPILARY STANDARD NON - POLARCOLOUMN  
 DIMENSION: 30Mts, ID: 0.25 mm, FILM: 0.25 IM CARRIER GAS: He

| # | RT     | Scan | Height      | Area        | Area % | Norm % |
|---|--------|------|-------------|-------------|--------|--------|
| 4 | 15.828 | 2565 | 108,177,888 | 4,303,653.0 | 6.905  | 100.00 |

| Pk # | RT     | Hit | Compound Name                      | Match | R.Match | Prob. | CAS        | Library |
|------|--------|-----|------------------------------------|-------|---------|-------|------------|---------|
| 4    | 15.828 | 1   | Dodecyl acrylate                   | 906   | 930     | 67.3  | 2156-97-0  | replib  |
|      |        | 2   | Dodecyl acrylate                   | 900   | 917     | 67.3  | 2156-97-0  | replib  |
|      |        | 3   | Dodecyl acrylate                   | 843   | 858     | 67.3  | 2156-97-0  | mainlib |
|      |        | 4   | 2-Propenoic acid, pentadecyl ester | 801   | 818     | 4.6   | 43080-23-5 | mainlib |
|      |        | 5   | 2-Propenoic acid, tridecyl ester   | 798   | 821     | 4.0   | 3076-04-8  | mainlib |
|      |        | 6   | 1-Dodecanol                        | 796   | 843     | 3.7   | 112-53-8   | replib  |
|      |        | 7   | 2-Propenoic acid, tetradecyl ester | 773   | 785     | 1.4   | 21643-42-5 | mainlib |
|      |        | 8   | Z-10-Tetradecen-1-ol acetate       | 762   | 769     | 0.9   |            | mainlib |
|      |        | 9   | Dichloroacetic acid, dodecyl ester | 760   | 778     | 0.9   | 83005-01-0 | mainlib |
|      |        | 10  | 3-(Prop-2-enyloxy)tetradecane      | 757   | 789     | 0.8   |            | mainlib |

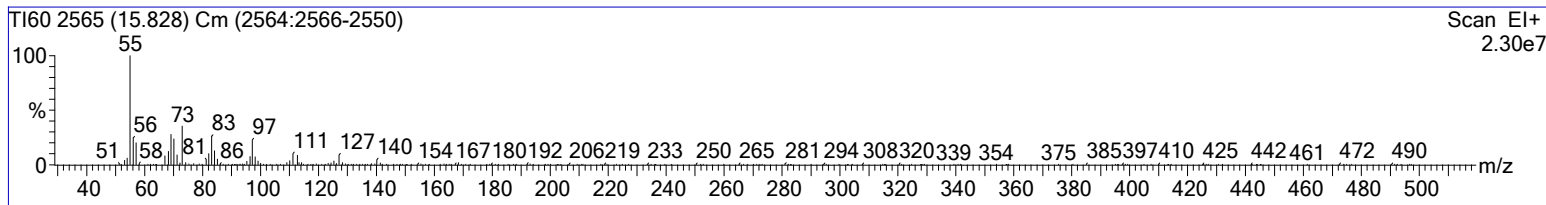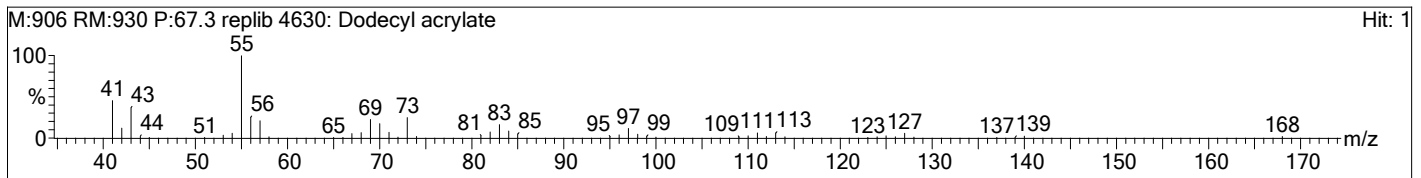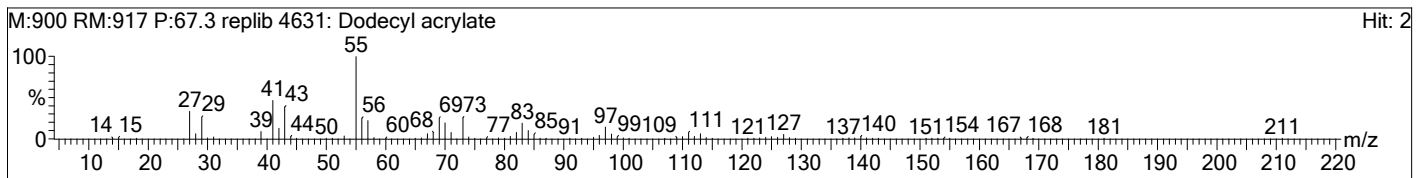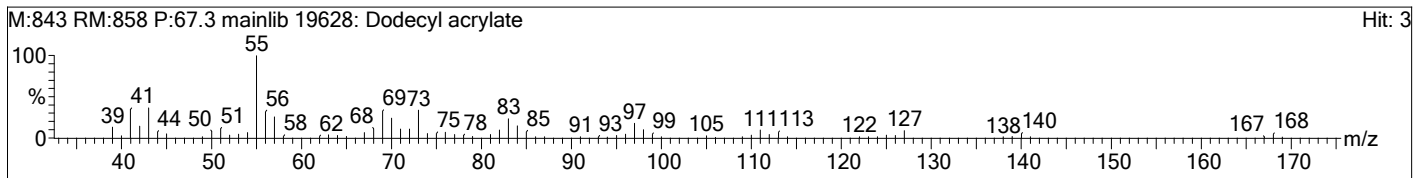

# TAMILNADU AGRICULTURAL UNIVERSITY - AGRICULTURAL MICROBIOLOGY

INSTRUMENT: PERKIN ELMER CLARUS SQ8C  
 INJECTION VOL: 1 MICRO LITER  
 SAMPLE ID : T160

COLOUMN: DB-5 MS CAPILARY STANDARD NON - POLARCOLOUMN  
 DIMENSION: 30Mts, ID: 0.25 mm, FILM: 0.25 IM CARRIER GAS: He

| # | RT     | Scan | Height    | Area      | Area % | Norm % |
|---|--------|------|-----------|-----------|--------|--------|
| 5 | 15.978 | 2595 | 7,190,967 | 461,969.0 | 0.741  | 10.73  |

| Pk # | RT     | Hit | Compound Name                           | Match | R.Match | Prob. | CAS        | Library |
|------|--------|-----|-----------------------------------------|-------|---------|-------|------------|---------|
| 5    | 15.978 | 1   | E-10-Dodecen-1-ol propionate            | 502   | 652     | 6.2   |            | mainlib |
|      |        | 2   | 1-Hexadecanol, 2-methyl-                | 493   | 568     | 4.5   | 2490-48-4  | mainlib |
|      |        | 3   | 1,2-Octadecanediol                      | 483   | 678     | 3.2   | 20294-76-2 | mainlib |
|      |        | 4   | 1-Nonadecene                            | 478   | 732     | 2.5   | 18435-45-5 | replib  |
|      |        | 5   | Cyclododecane                           | 475   | 623     | 2.3   | 294-62-2   | replib  |
|      |        | 6   | 1-Dodecanol, 3,7,11-trimethyl-          | 475   | 606     | 2.3   | 6750-34-1  | replib  |
|      |        | 7   | Hexadecen-1-ol, trans-9-                | 472   | 728     | 2.0   | 64437-47-4 | mainlib |
|      |        | 8   | Propanoic acid, decyl ester             | 471   | 704     | 1.9   | 5454-19-3  | mainlib |
|      |        | 9   | Butyl hexadecyl ether                   | 470   | 675     | 1.8   |            | mainlib |
|      |        | 10  | Dichloroacetic acid, 2-tetradecyl ester | 469   | 695     | 1.8   |            | mainlib |

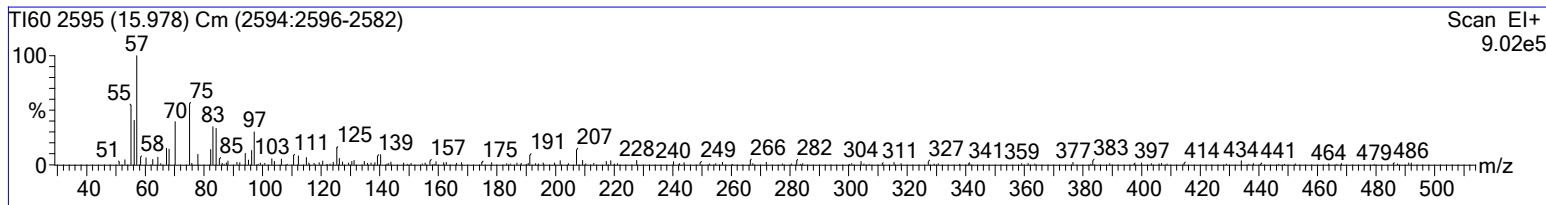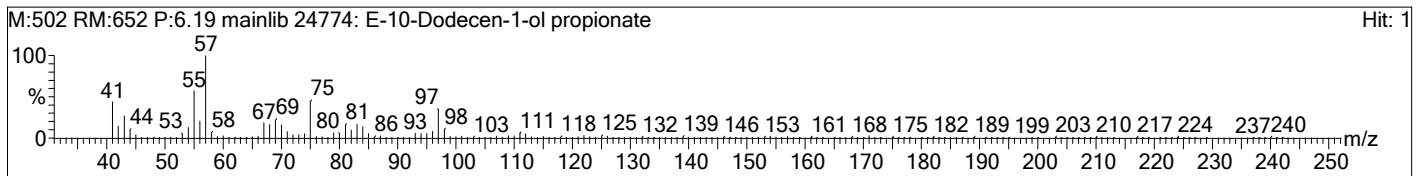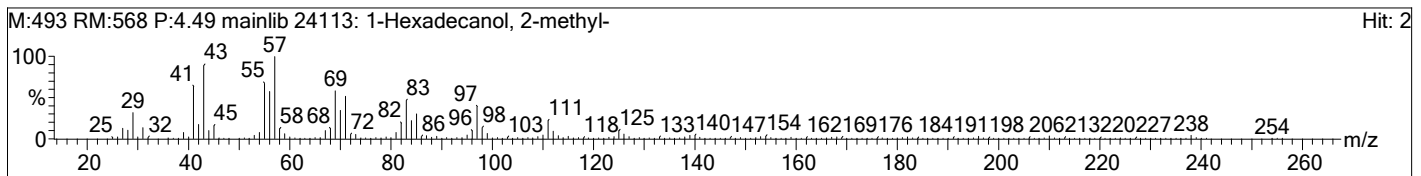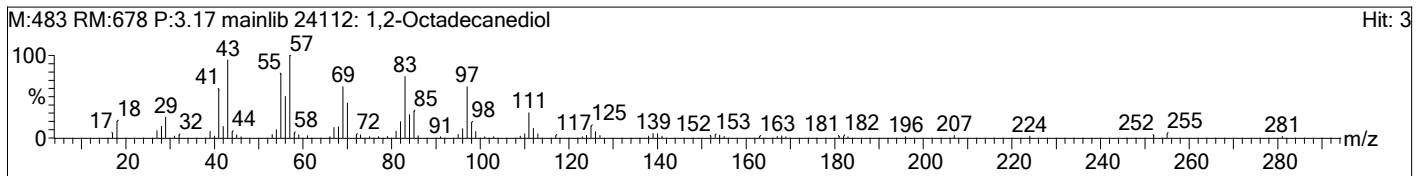

# TAMILNADU AGRICULTURAL UNIVERSITY - AGRICULTURAL MICROBIOLOGY

INSTRUMENT: PERKIN ELMER CLARUS SQ8C  
 INJECTION VOL: 1 MICRO LITER  
 SAMPLE ID : T160

COLOUMN: DB-5 MS CAPILARY STANDARD NON - POLARCOLOUMN  
 DIMENSION: 30Mts, ID: 0.25 mm, FILM: 0.25 IM CARRIER GAS: He

| # | RT     | Scan | Height    | Area      | Area % | Norm % |
|---|--------|------|-----------|-----------|--------|--------|
| 6 | 20.570 | 3513 | 6,694,133 | 323,641.2 | 0.519  | 7.52   |

| PK # | RT     | Hit | Compound Name                                | Match | R.Match | Prob. | CAS        | Library |
|------|--------|-----|----------------------------------------------|-------|---------|-------|------------|---------|
| 6    | 20.570 | 1   | Pentadecanoic acid, 14-methyl-, methyl ester | 465   | 687     | 7.1   | 5129-60-2  | mainlib |
|      |        | 2   | Nonadecanoic acid, methyl ester              | 457   | 548     | 5.3   | 1731-94-8  | replib  |
|      |        | 3   | Undecanoic acid, 11-bromo-, methyl ester     | 454   | 619     | 4.7   | 6287-90-7  | replib  |
|      |        | 4   | Tridecanoic acid, methyl ester               | 450   | 669     | 4.0   | 1731-88-0  | replib  |
|      |        | 5   | 9-Bromononanoic acid, methyl(ester)          | 449   | 627     | 3.8   | 67878-15-3 | mainlib |
|      |        | 6   | Dodecanoic acid, 10-methyl-, methyl ester    | 446   | 681     | 3.4   | 5129-65-7  | mainlib |
|      |        | 7   | Hexadecanoic acid, methyl ester              | 446   | 653     | 3.4   | 112-39-0   | replib  |
|      |        | 8   | Tridecanoic acid, methyl ester               | 445   | 825     | 4.0   | 1731-88-0  | replib  |
|      |        | 9   | Tridecanoic acid, methyl ester               | 445   | 666     | 4.0   | 1731-88-0  | mainlib |
|      |        | 10  | Hexadecanoic acid, 15-methyl-, methyl ester  | 444   | 667     | 3.1   | 6929-04-0  | mainlib |

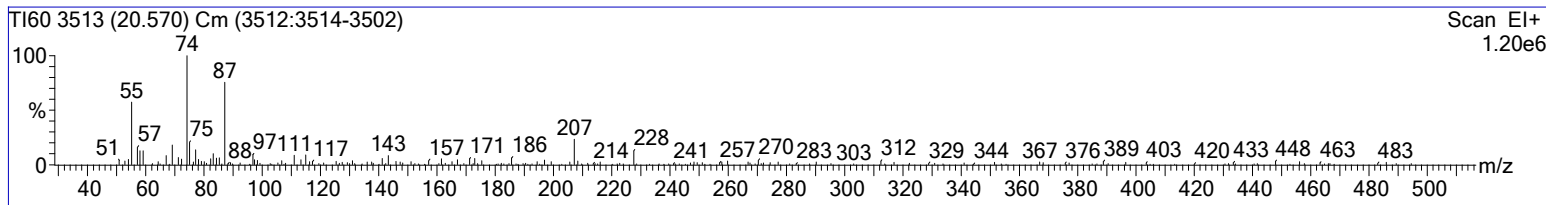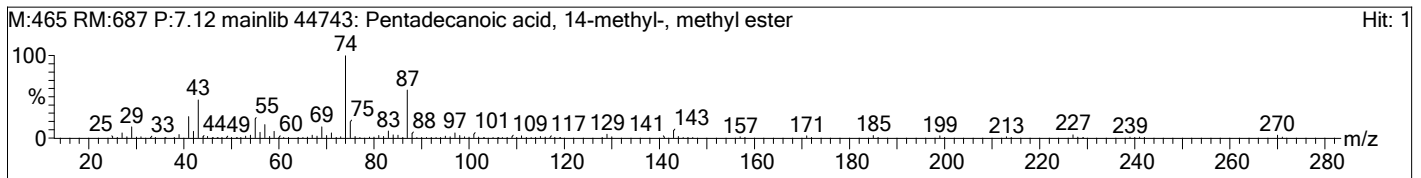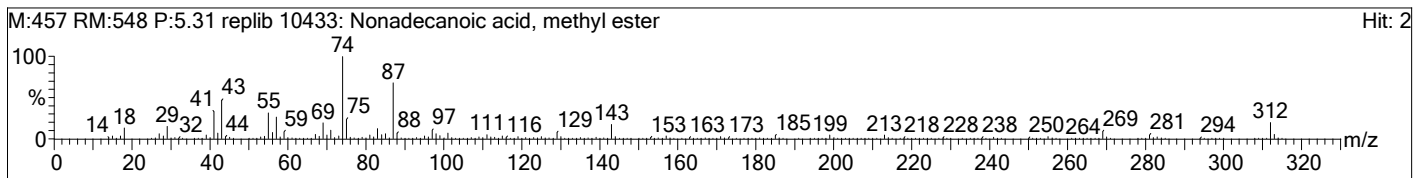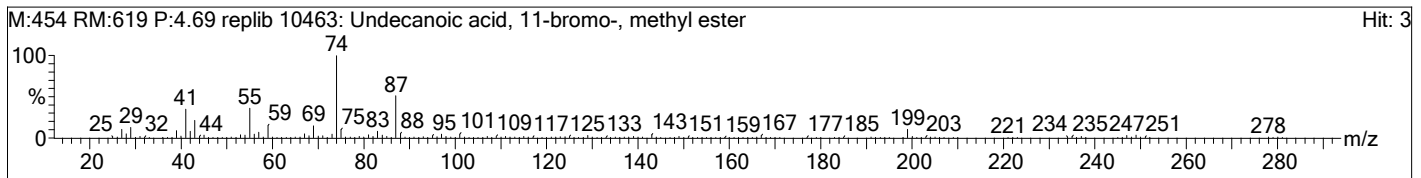

# TAMILNADU AGRICULTURAL UNIVERSITY - AGRICULTURAL MICROBIOLOGY

INSTRUMENT: PERKIN ELMER CLARUS SQ8C  
 INJECTION VOL: 1 MICRO LITER  
 SAMPLE ID : T160

COLOUMN: DB-5 MS CAPILARY STANDARD NON - POLARCOLOUMN  
 DIMENSION: 30Mts, ID: 0.25 mm, FILM: 0.25 IM CARRIER GAS: He

| # | RT     | Scan | Height    | Area      | Area % | Norm % |
|---|--------|------|-----------|-----------|--------|--------|
| 7 | 24.352 | 4269 | 9,463,171 | 437,936.9 | 0.703  | 10.18  |

| Pk # | RT     | Hit | Compound Name                                | Match | R.Match | Prob. | CAS       | Library |
|------|--------|-----|----------------------------------------------|-------|---------|-------|-----------|---------|
| 7    | 24.352 | 1   | Methyl tetradecanoate                        | 560   | 721     | 9.2   | 124-10-7  | replib  |
|      |        | 2   | Methyl tetradecanoate                        | 549   | 742     | 9.2   | 124-10-7  | replib  |
|      |        | 3   | Hexadecanoic acid, 14-methyl-, methyl ester  | 549   | 607     | 6.3   | 2490-49-5 | mainlib |
|      |        | 4   | Undecanoic acid, 11-bromo-, methyl ester     | 543   | 664     | 5.0   | 6287-90-7 | replib  |
|      |        | 5   | Hexadecanoic acid, 15-methyl-, methyl ester  | 542   | 606     | 4.8   | 6929-04-0 | replib  |
|      |        | 6   | Heptadecanoic acid, 16-methyl-, methyl ester | 538   | 637     | 4.0   | 5129-61-3 | mainlib |
|      |        | 7   | Tetradecanoic acid, 12-methyl-, methyl ester | 535   | 640     | 3.6   | 5129-66-8 | mainlib |
|      |        | 8   | Tridecanoic acid, 12-methyl-, methyl ester   | 531   | 759     | 3.0   | 5129-58-8 | replib  |
|      |        | 9   | Dodecanoic acid, 2-methyl-                   | 531   | 728     | 3.0   | 2874-74-0 | replib  |
|      |        | 10  | Hexadecanoic acid, 15-methyl-, methyl ester  | 529   | 692     | 4.8   | 6929-04-0 | mainlib |

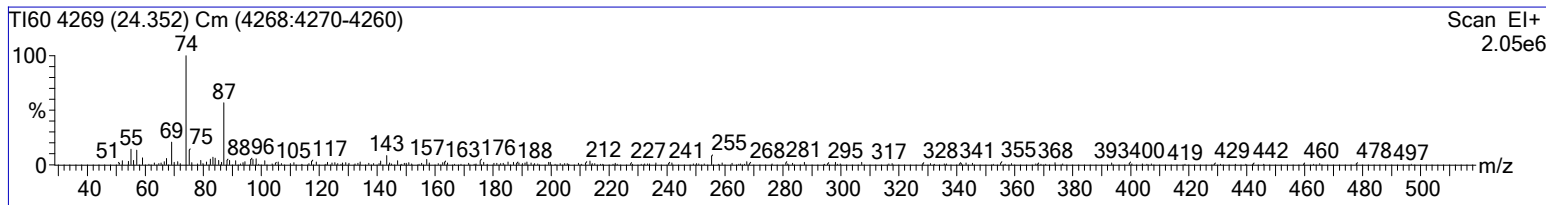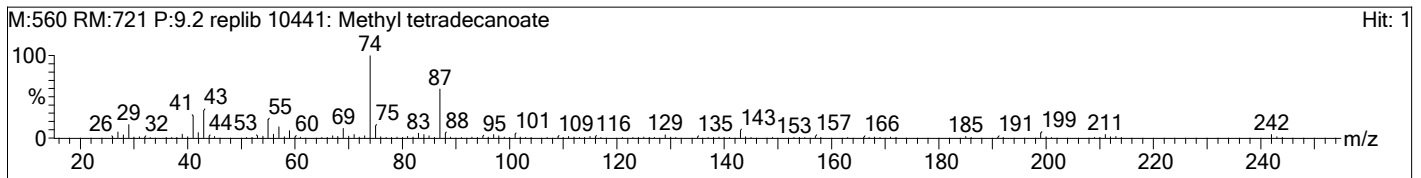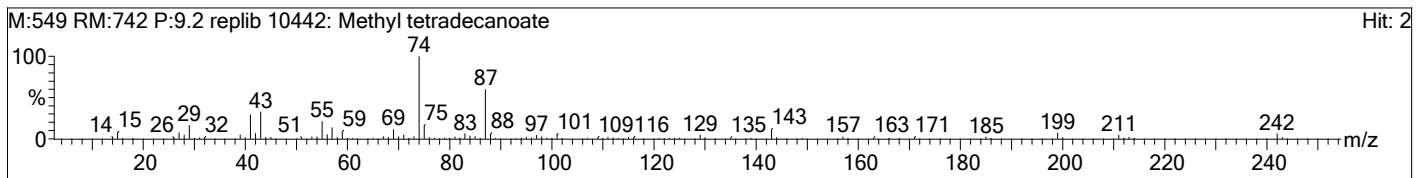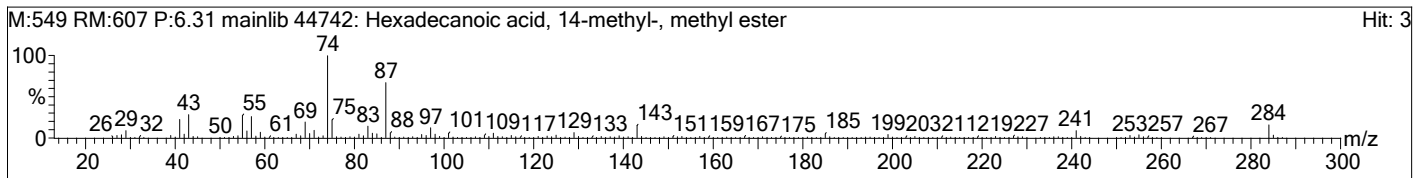

# TAMILNADU AGRICULTURAL UNIVERSITY - AGRICULTURAL MICROBIOLOGY

INSTRUMENT: PERKIN ELMER CLARUS SQ8C  
 INJECTION VOL: 1 MICRO LITER  
 SAMPLE ID : T160

COLOUMN: DB-5 MS CAPILARY STANDARD NON - POLARCOLOUMN  
 DIMENSION: 30Mts, ID: 0.25 mm, FILM: 0.25 IM CARRIER GAS: He

| # | RT     | Scan | Height    | Area      | Area % | Norm % |
|---|--------|------|-----------|-----------|--------|--------|
| 8 | 30.019 | 5402 | 6,070,414 | 588,327.9 | 0.944  | 13.67  |

| PK # | RT     | Hit | Compound Name                                                                                          | Match | R.Match | Prob. | CAS         | Library |
|------|--------|-----|--------------------------------------------------------------------------------------------------------|-------|---------|-------|-------------|---------|
| 8    | 30.019 | 1   | 5,7,9(11)-Androstatriene, 3-hydroxy-17-oxo-                                                            | 406   | 511     | 13.5  |             | mainlib |
|      |        | 2   | 1,8-Dioxa-5-thiaoctane, 8-(9-borabicyclo[3.3.1]non-9-yl)-3-(9-borabicyclo[3.3.1]non-9-yloxy)-1-phenyl- | 386   | 446     | 6.2   |             | mainlib |
|      |        | 3   | Acetic acid, 2-[[3-cyano-4-(methoxymethyl)-6-methyl-2-pyridinyl]thio]-                                 | 372   | 504     | 3.8   |             | mainlib |
|      |        | 4   | Tripolidine                                                                                            | 372   | 503     | 3.8   | 486-12-4    | replib  |
|      |        | 5   | N-(2,4-Dimethylphenyl)-7-nitro-2,1,3-benzoxadiazol-4-amine                                             | 369   | 451     | 3.4   |             | mainlib |
|      |        | 6   | Tripolidine                                                                                            | 366   | 505     | 3.8   | 486-12-4    | replib  |
|      |        | 7   | Benzothiazole-2,3-dicarboxylic acid, 2,3-dihydro-6-nitro-, dimethyl ester, 1,1-dioxide                 | 366   | 458     | 3.0   | 335434-44-1 | mainlib |
|      |        | 8   | Thiocarbamic acid, N,N-dimethyl, S-1,3-diphenyl-2-butenyl ester                                        | 365   | 478     | 2.9   |             | mainlib |
|      |        | 9   | Tripolidine                                                                                            | 364   | 490     | 3.8   | 486-12-4    | replib  |
|      |        | 10  | Ethyl 4,4,6,6,8,8-hexamethyl-11-oxo-3,5,7,9,12-pentaoxa-4,6,8-trisilatetradecan-1-oate                 | 363   | 490     | 2.7   |             | mainlib |

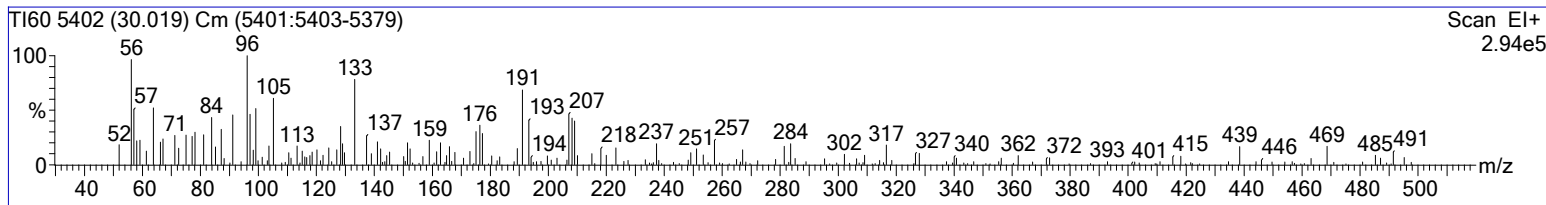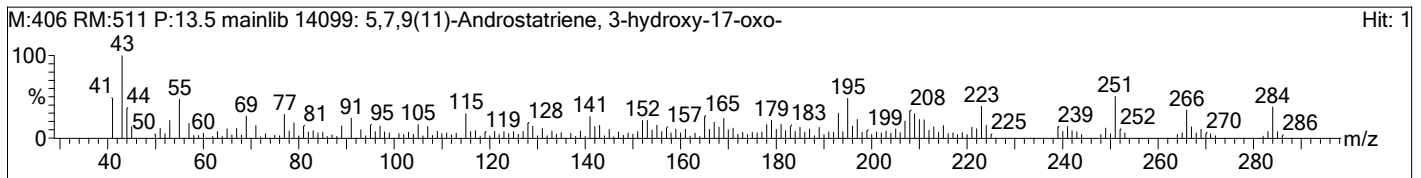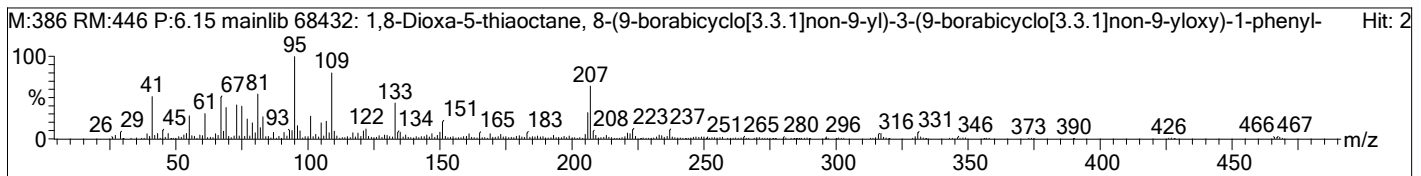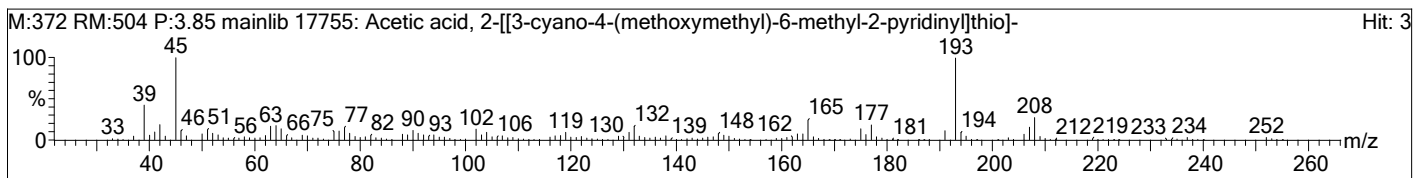



# TAMILNADU AGRICULTURAL UNIVERSITY - AGRICULTURAL MICROBIOLOGY

INSTRUMENT: PERKIN ELMER CLARUS SQ8C  
 INJECTION VOL: 1 MICRO LITER  
 SAMPLE ID : T160

COLOUMN: DB-5 MS CAPILARY STANDARD NON - POLARCOLOUMN  
 DIMENSION: 30Mts, ID: 0.25 mm, FILM: 0.25 IM CARRIER GAS: He

| # | RT     | Scan | Height    | Area      | Area % | Norm % |
|---|--------|------|-----------|-----------|--------|--------|
| 9 | 30.149 | 5428 | 8,710,438 | 548,205.6 | 0.880  | 12.74  |

| PK # | RT     | Hit | Compound Name                                                                                           | Match | R.Match | Prob. | CAS        | Library |
|------|--------|-----|---------------------------------------------------------------------------------------------------------|-------|---------|-------|------------|---------|
| 9    | 30.149 | 1   | Benzo[h]quinoline, 2,4-dimethyl-                                                                        | 430   | 654     | 8.2   | 605-67-4   | mainlib |
|      |        | 2   | 1,2-Benzenediol, 3,5-bis(1,1-dimethylethyl)-                                                            | 426   | 562     | 6.9   | 1020-31-1  | replib  |
|      |        | 3   | 1,2-Benzenediol, 3,5-bis(1,1-dimethylethyl)-                                                            | 424   | 608     | 6.9   | 1020-31-1  | mainlib |
|      |        | 4   | 2-Bromo-4,5-dimethoxycinnamic acid                                                                      | 421   | 584     | 5.6   | 51314-72-8 | mainlib |
|      |        | 5   | 1,2-Dimethoxy-4-(1,3-dimethoxy-1-propenyl)benzene                                                       | 421   | 568     | 5.6   |            | mainlib |
|      |        | 6   | Benzo[h]quinoline, 2,4-dimethyl-                                                                        | 418   | 734     | 8.2   | 605-67-4   | replib  |
|      |        | 7   | 2-Methyl-pentanoic acid [4-(2-methyl-pentanoylsulfamoyl)-phenyl]-amide                                  | 414   | 496     | 4.3   |            | mainlib |
|      |        | 8   | 6-Amino-5-cyano-4-(5-cyano-2,4-dimethyl-1H-pyrrol-3-yl)-2-methyl-4H-pyran-3-carboxylic acid ethyl ester | 411   | 480     | 3.8   |            | mainlib |
|      |        | 9   | 5H-Benzo[b]pyran-8-ol, 2,3,5,5,8a-pentamethyl-6,7,8,8a-tetrahydro-                                      | 409   | 498     | 3.5   | 97306-66-6 | replib  |
|      |        | 10  | 4,6-di-tert-Butylresorcinol                                                                             | 405   | 568     | 2.9   | 5374-06-1  | mainlib |

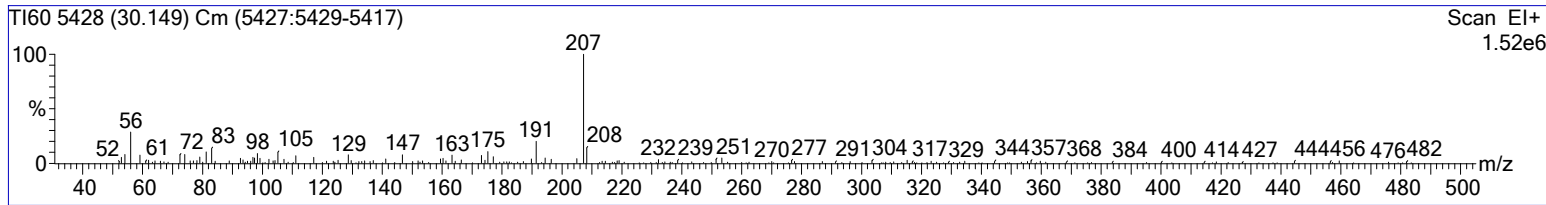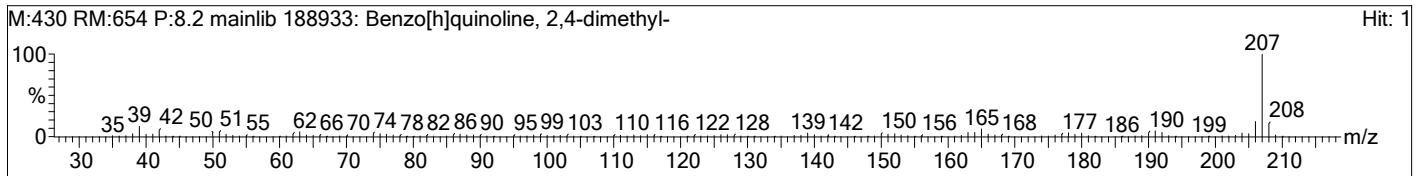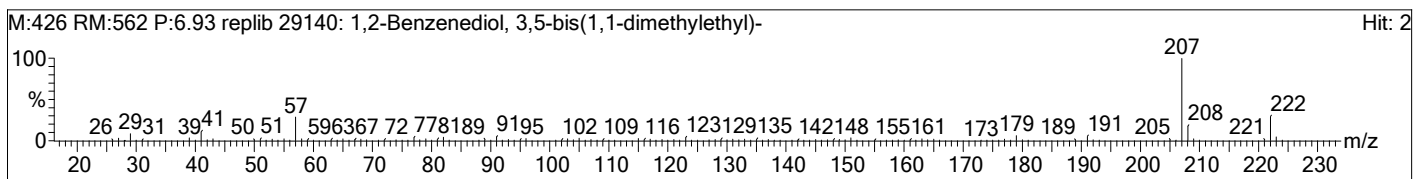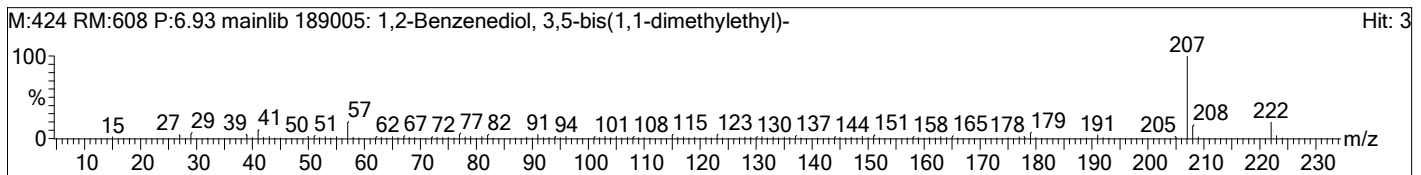

# TAMILNADU AGRICULTURAL UNIVERSITY - AGRICULTURAL MICROBIOLOGY

INSTRUMENT: PERKIN ELMER CLARUS SQ8C  
 INJECTION VOL: 1 MICRO LITER  
 SAMPLE ID : T160

COLOUMN: DB-5 MS CAPILARY STANDARD NON - POLARCOLOUMN  
 DIMENSION: 30Mts, ID: 0.25 mm, FILM: 0.25 IM CARRIER GAS: He

| #  | RT     | Scan | Height     | Area      | Area % | Norm % |
|----|--------|------|------------|-----------|--------|--------|
| 10 | 30.194 | 5437 | 10,091,696 | 847,115.9 | 1.359  | 19.68  |

| PK # | RT     | Hit | Compound Name                                                                                                                            | Match | R.Match | Prob. | CAS         | Library |
|------|--------|-----|------------------------------------------------------------------------------------------------------------------------------------------|-------|---------|-------|-------------|---------|
| 10   | 30.194 | 1   | 1,4,7-Androstatrien-3,17-dione                                                                                                           | 398   | 477     | 10.4  | 14532-68-4  | mainlib |
|      |        | 2   | 1,8-Dioxa-5-thiaoctane, 8-(9-borabicyclo[3.3.1]non-9-yl)-3-(9-borabicyclo[3.3.1]non-9-yloxy)-1-phenyl-                                   | 387   | 445     | 7.1   |             | mainlib |
|      |        | 3   | Acetic acid, 3-acetoxy-6-(2-cyanovinyl)-3a,6-dimethyl-2,3,3a,4,5,5a,6,9,9a,9b-decahydro-1H-cyclopenta[a]naphthalen-7-ylmethyl ester      | 379   | 430     | 5.3   |             | mainlib |
|      |        | 4   | 4-[4-(2-Methoxyphenyl)-1H-pyrazol-3-yl]benzene-1,3-diol                                                                                  | 375   | 446     | 4.5   |             | mainlib |
|      |        | 5   | D-Homo-24-nor-17-oxachola-20,22-dien-16-one, 1,3,7-tris(acetyloxy)-14,15:21,23-diepoxy-4,4,8-trimethyl-, (1à,3à,5à,7à,13à,14á,15á,17aà)- | 374   | 397     | 4.3   | 2524-38-1   | mainlib |
|      |        | 6   | 5àAndrost-16-ol, 17-ethylidene-3,5-dedihydro-6-methoxy-, pivalate                                                                        | 368   | 432     | 3.4   |             | mainlib |
|      |        | 7   | 9-Octadecenoic acid (Z)-, tetradecyl ester                                                                                               | 368   | 406     | 3.4   | 22393-85-7  | mainlib |
|      |        | 8   | Acridin-1(2H)-one, 3,4-dihydro-3,3-dimethyl-9-propylamino-                                                                               | 365   | 452     | 3.0   | 146352-02-5 | mainlib |
|      |        | 9   | 1-(2-Acetoxyethyl)-3,6-diazahomoadamantan-9-one oxime                                                                                    | 365   | 448     | 3.0   |             | mainlib |
|      |        | 10  | Ingol 3,8,12-triacetate                                                                                                                  | 365   | 398     | 3.0   |             | mainlib |

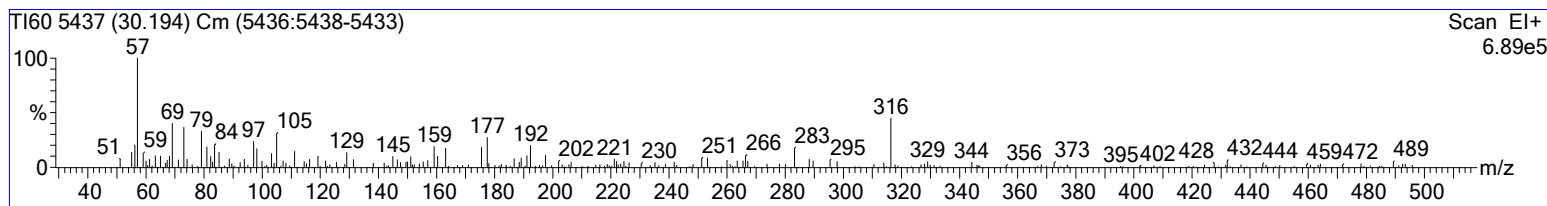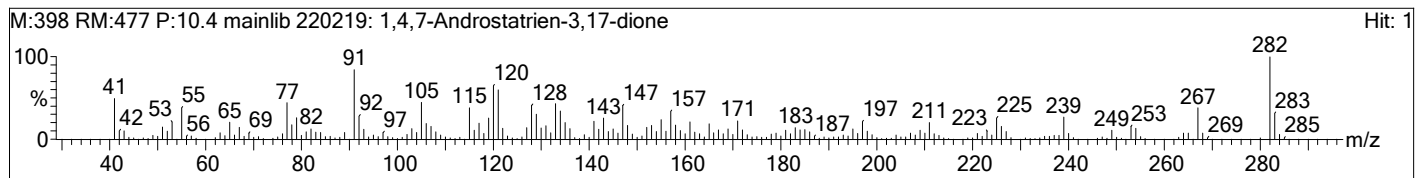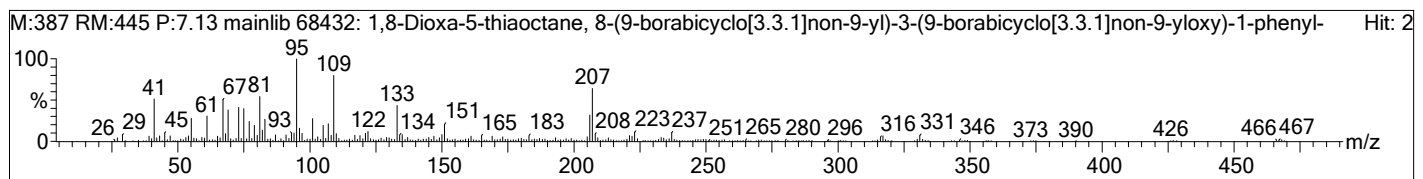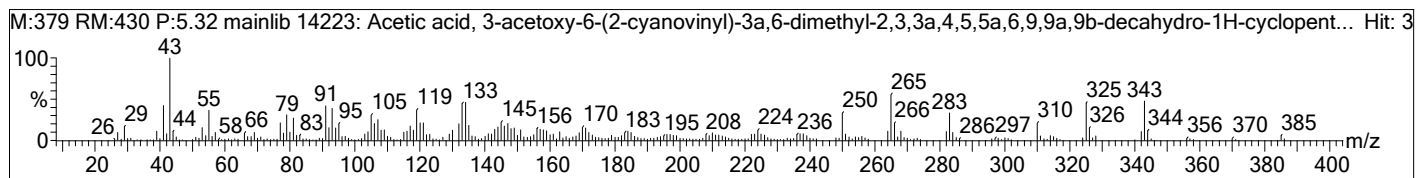

# TAMILNADU AGRICULTURAL UNIVERSITY - AGRICULTURAL MICROBIOLOGY

INSTRUMENT: PERKIN ELMER CLARUS SQ8C  
 INJECTION VOL: 1 MICRO LITER  
 SAMPLE ID : T160

COLOUMN: DB-5 MS CAPILARY STANDARD NON - POLARCOLOUMN  
 DIMENSION: 30Mts, ID: 0.25 mm, FILM: 0.25 IM CARRIER GAS: He

| #  | RT     | Scan | Height     | Area      | Area % | Norm % |
|----|--------|------|------------|-----------|--------|--------|
| 11 | 30.304 | 5459 | 12,607,431 | 459,718.3 | 0.738  | 10.68  |

| PK # | RT     | Hit | Compound Name                                                                                                                                                                                                  | Match | R.Match | Prob. | CAS        | Library |
|------|--------|-----|----------------------------------------------------------------------------------------------------------------------------------------------------------------------------------------------------------------|-------|---------|-------|------------|---------|
| 11   | 30.304 | 1   | Docosanoic acid, 1,2,3-propanetriyl ester                                                                                                                                                                      | 402   | 425     | 5.8   | 18641-57-1 | mainlib |
|      |        | 2   | Dodecanoic acid, 1a,2,5,5a,6,9,10,10a-octahydro-5a-hydroxy-4-(hydroxymethyl)-1,1,7,9-tetramethyl-6,11-dioxo-1H-2,8a-methanocyclopenta[a]cyclopropa[e]cyclodecen-5-yl ester, [1aR-(1aà,2à,5á,5aá,8aà,9à,10aà)]- | 396   | 396     | 4.5   | 77508-68-0 | mainlib |
|      |        | 3   | Octadecane, 3-ethyl-5-(2-ethylbutyl)-                                                                                                                                                                          | 389   | 422     | 3.5   | 55282-12-7 | mainlib |
|      |        | 4   | 10-Acetoxy-2-hydroxy-1,2,6a,6b,9,9,12a-heptamethyl-1,3,4,5,6,6a,6b,7,8,8a,9,10,11,12,12a,12b,13,14b-octadecahydro-2H-picene-4a-carboxylic acid, methyl ester                                                   | 387   | 405     | 3.2   | 14356-56-0 | mainlib |
|      |        | 5   | á-D-Galactopyranoside, methyl 2,3-bis-O-(trimethylsilyl)-, cyclic butylboronate                                                                                                                                | 386   | 463     | 3.1   | 56211-10-0 | mainlib |
|      |        | 6   | Acetic acid, 17-(4-hydroxy-5-methoxy-1,5-dimethylhexyl)-4,4,10,13,14-pentamethyl-2,3,4,5,6,7,10,11,12,13,14,15,16,17-tetradecahydrocyclopenta[a]phenanthryl ester                                              | 386   | 404     | 3.1   |            | mainlib |
|      |        | 7   | Dihydromorphine, 2TMS derivative                                                                                                                                                                               | 385   | 412     | 3.0   |            | mainlib |
|      |        | 8   | 3á,4á-Bis(trimethylsiloxy)cholest-5-ene                                                                                                                                                                        | 384   | 426     | 2.8   | 33287-25-1 | mainlib |
|      |        | 9   | Cholest-1-eno[2,1-a]naphthalene, 3',4'-dihydro-                                                                                                                                                                | 380   | 403     | 2.4   |            | mainlib |
|      |        | 10  | 17-Pentatriacontene                                                                                                                                                                                            | 378   | 400     | 2.2   | 6971-40-0  | mainlib |

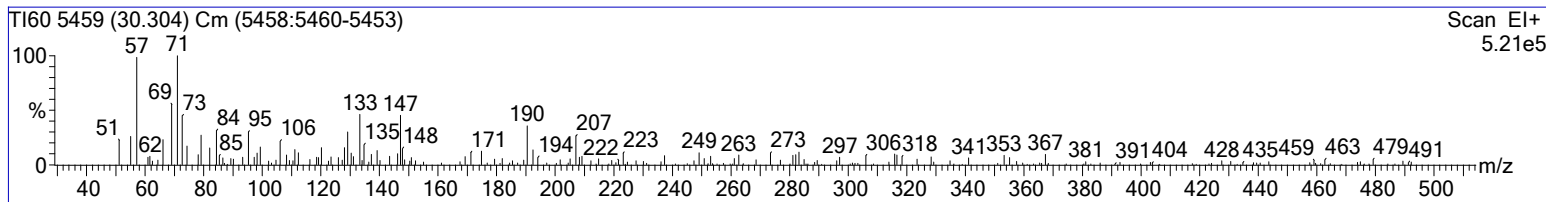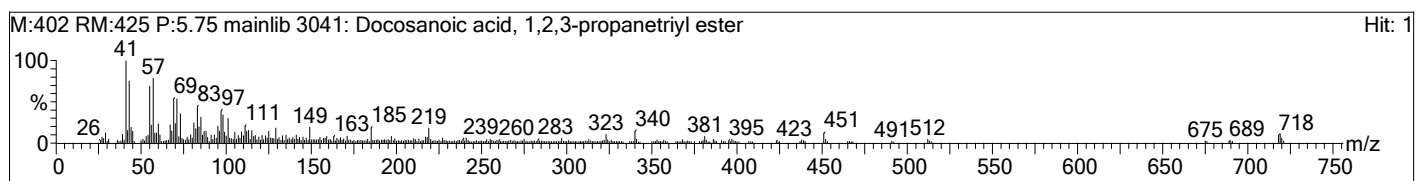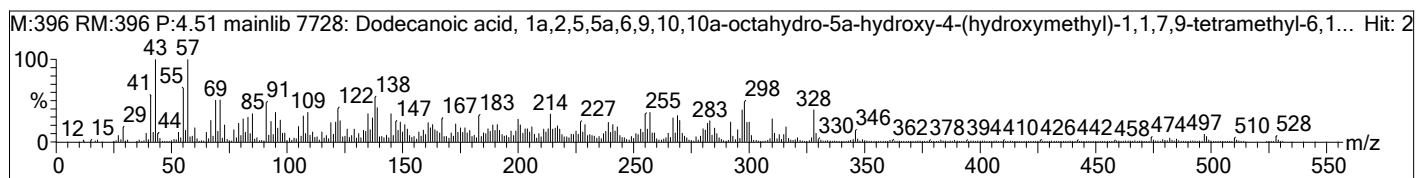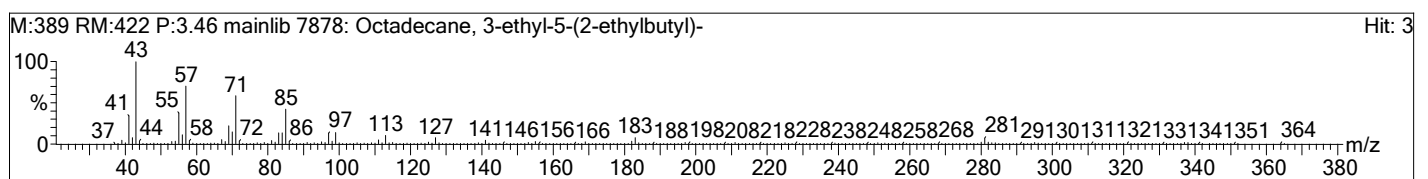

# TAMILNADU AGRICULTURAL UNIVERSITY - AGRICULTURAL MICROBIOLOGY

INSTRUMENT: PERKIN ELMER CLARUS SQ8C  
 INJECTION VOL: 1 MICRO LITER  
 SAMPLE ID : T160

COLOUMN: DB-5 MS CAPILARY STANDARD NON - POLARCOLOUMN  
 DIMENSION: 30Mts, ID: 0.25 mm, FILM: 0.25 IM CARRIER GAS: He

| #  | RT     | Scan | Height     | Area      | Area % | Norm % |
|----|--------|------|------------|-----------|--------|--------|
| 12 | 30.364 | 5471 | 10,596,189 | 368,394.3 | 0.591  | 8.56   |

| Pk # | RT     | Hit | Compound Name                                                                                                                   | Match | R.Match | Prob. | CAS        | Library |
|------|--------|-----|---------------------------------------------------------------------------------------------------------------------------------|-------|---------|-------|------------|---------|
| 12   | 30.364 | 1   | .psi.,.psi.-Carotene, 1,1',2,2'-tetrahydro-1,1'-dimethoxy-                                                                      | 422   | 422     | 30.0  | 13833-01-7 | mainlib |
|      |        | 2   | 1,8-Dioxa-5-thiaoctane, 8-(9-borabicyclo[3.3.1]non-9-yl)-3-(9-borabicyclo[3.3.1]non-9-yloxy)-1-phenyl-                          | 385   | 445     | 7.3   |            | mainlib |
|      |        | 3   | D-Homo-24-nor-17-oxachola-20,22-diene-3,16-dione, 14,15:21,23-diepoxy-7-hydroxy-4,4,8-trimethyl-, (5à,7à,13à,14á,15á,17aà)-     | 385   | 406     | 7.3   | 10314-91-7 | mainlib |
|      |        | 4   | d-Homo-24-nor-17-oxachola-20,22-diene-3,16-dione, 7-(acetyloxy)-14,15:21,23-diepoxy-4,4,8-trimethyl-, (5à,7à,13à,14á,15á,17aà)- | 374   | 388     | 5.0   | 2629-11-0  | mainlib |
|      |        | 5   | .psi.,.psi.-Carotene, 3,4-didehydro-1,2,7',8'-tetrahydro-1-methoxy-2-oxo-                                                       | 373   | 376     | 4.8   | 13836-70-9 | mainlib |
|      |        | 6   | 2-[(3H-Benzoimidazol-5-ylimino)-methyl]-4-nitrophenol                                                                           | 358   | 464     | 2.9   |            | mainlib |
|      |        | 7   | 3-Heptafluorobutyriloyloxy-3,5,10-pregnatrien-20-one                                                                            | 355   | 414     | 2.6   |            | mainlib |
|      |        | 8   | Butane-1,4-dioic acid, 2-[S-[3,6-dihydroxy-2,4,5-trimethylphenyl]thio]-                                                         | 354   | 434     | 2.5   |            | mainlib |
|      |        | 9   | 11-Dimethyl-1,2,3,4-tetrahydro-1,4-methanophenazine-1-carboxylic acid, methyl ester                                             | 353   | 428     | 2.4   |            | mainlib |
|      |        | 10  | Thiocoumarin-7-ol-2-aceic acid, 5,6,8-trimethyl-                                                                                | 348   | 423     | 1.9   |            | mainlib |

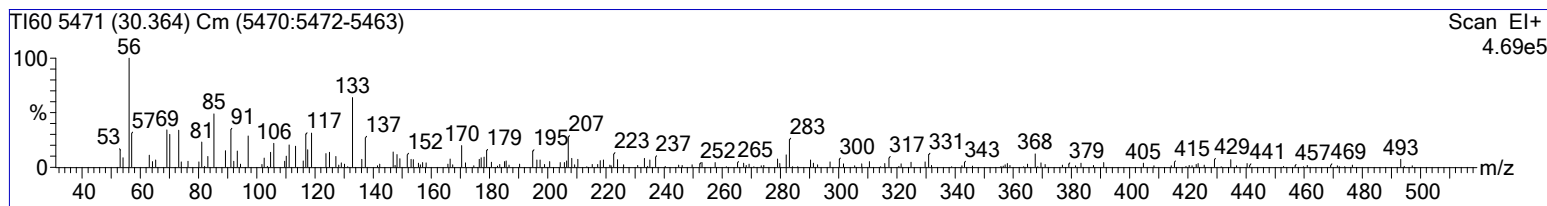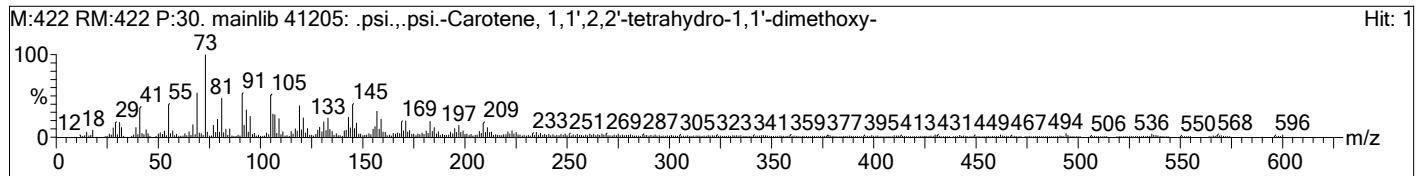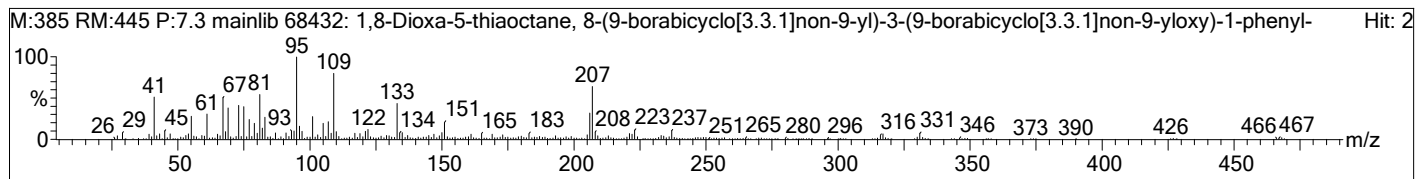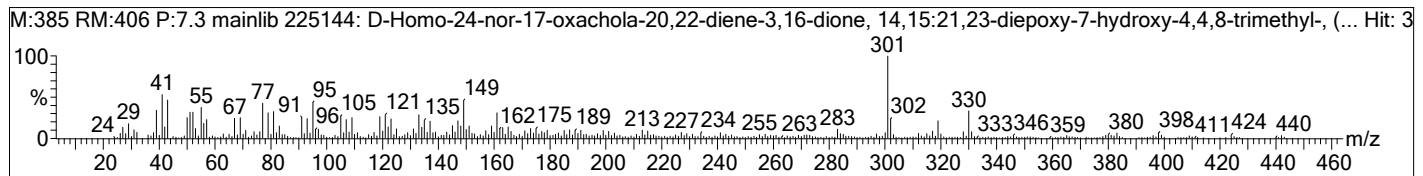

# TAMILNADU AGRICULTURAL UNIVERSITY - AGRICULTURAL MICROBIOLOGY

INSTRUMENT: PERKIN ELMER CLARUS SQ8C  
 INJECTION VOL: 1 MICRO LITER  
 SAMPLE ID : T160

COLOUMN: DB-5 MS CAPILARY STANDARD NON - POLARCOLOUMN  
 DIMENSION: 30Mts, ID: 0.25 mm, FILM: 0.25 IM CARRIER GAS: He

| #  | RT     | Scan | Height     | Area      | Area % | Norm % |
|----|--------|------|------------|-----------|--------|--------|
| 13 | 30.434 | 5485 | 13,337,660 | 868,989.6 | 1.394  | 20.19  |

| Pk # | RT     | Hit | Compound Name                            | Match | R.Match | Prob. | CAS       | Library   |
|------|--------|-----|------------------------------------------|-------|---------|-------|-----------|-----------|
| 13   | 30.434 | 1   | Estriol 16à-(â-D-glucuronide)            | 697   | 999     | 55.1  | 1852-50-2 | nist_msms |
|      |        | 2   | Estriol 16à-(â-D-glucuronide)            | 697   | 999     | 55.1  | 1852-50-2 | nist_msms |
|      |        | 3   | Estriol 16à-(â-D-glucuronide)            | 697   | 999     | 55.1  | 1852-50-2 | nist_msms |
|      |        | 4   | Estriol 16à-(â-D-glucuronide)            | 697   | 999     | 55.1  | 1852-50-2 | nist_msms |
|      |        | 5   | Estriol 16à-(â-D-glucuronide)            | 697   | 999     | 55.1  | 1852-50-2 | nist_msms |
|      |        | 6   | Hyperoside                               | 689   | 988     | 41.1  | 482-36-0  | nist_msms |
|      |        | 7   | 4-Androsten-17â-ol-3-one glucosiduronate | 592   | 786     | 3.2   | 1180-25-2 | nist_msms |
|      |        | 8   | Hyperoside                               | 563   | 807     | 41.1  | 482-36-0  | nist_msms |
|      |        | 9   | 4-Androsten-17â-ol-3-one glucosiduronate | 561   | 805     | 3.2   | 1180-25-2 | nist_msms |
|      |        | 10  | 4-Androsten-17â-ol-3-one glucosiduronate | 559   | 802     | 3.2   | 1180-25-2 | nist_msms |

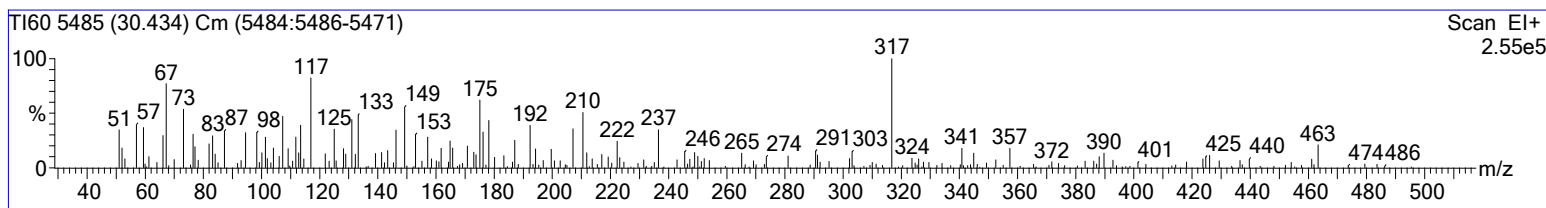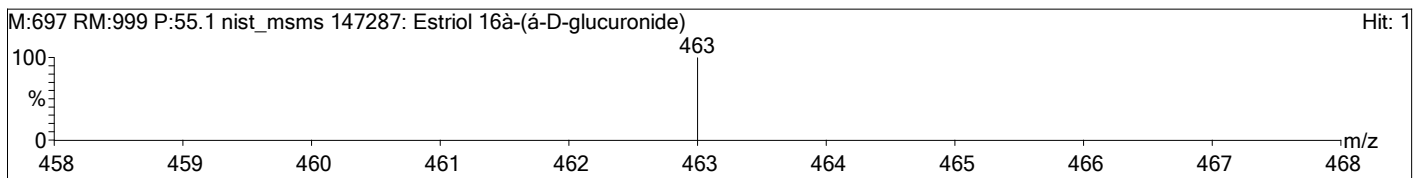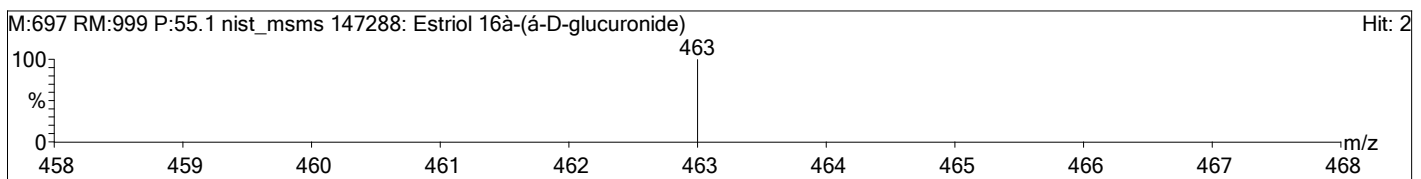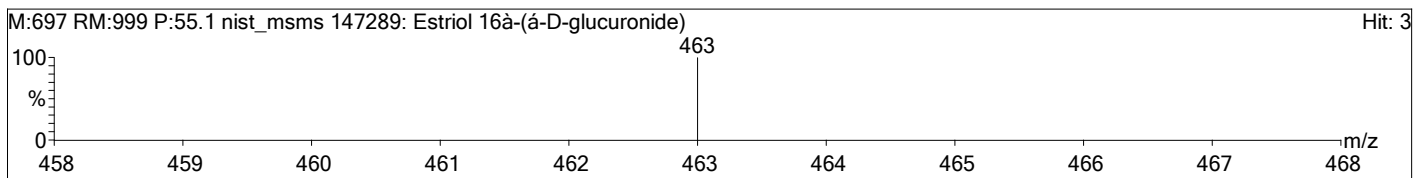

# TAMILNADU AGRICULTURAL UNIVERSITY - AGRICULTURAL MICROBIOLOGY

INSTRUMENT: PERKIN ELMER CLARUS SQ8C  
 INJECTION VOL: 1 MICRO LITER  
 SAMPLE ID : T160

COLOUMN: DB-5 MS CAPILARY STANDARD NON - POLARCOLOUMN  
 DIMENSION: 30Mts, ID: 0.25 mm, FILM: 0.25 IM CARRIER GAS: He

| #  | RT     | Scan | Height     | Area        | Area % | Norm % |
|----|--------|------|------------|-------------|--------|--------|
| 14 | 30.554 | 5509 | 15,085,814 | 1,223,963.0 | 1.964  | 28.44  |

| PK # | RT     | Hit | Compound Name                                                                                                                                                | Match | R.Match | Prob. | CAS         | Library |
|------|--------|-----|--------------------------------------------------------------------------------------------------------------------------------------------------------------|-------|---------|-------|-------------|---------|
| 14   | 30.554 | 1   | 7aH-Cyclopenta[a]cyclopropa[f]cycloundecene-2,4,7,7a,10,11-hexol, 1,1a,2,3,4,4a,5,6,7,10,11,11a-dodecahydro-1,1,3,6,9-pentamethyl-, 2,4,7,10,11-pentaacetate | 422   | 436     | 11.3  | 51906-08-2  | mainlib |
|      |        | 2   | 1-(2-Acetoxyethyl)-3,6-diazahomoadamantan-9-one oxime                                                                                                        | 415   | 493     | 8.6   |             | mainlib |
|      |        | 3   | Propanedioic acid, mononitrile, 2-[tetrahydro-4-(4-fluorophenyl)-2,2-dimethyl-4-pyranyl]-, ethyl ester                                                       | 404   | 489     | 5.9   | 120729-52-4 | mainlib |
|      |        | 4   | Endrin ketone                                                                                                                                                | 404   | 452     | 5.9   | 53494-70-5  | replib  |
|      |        | 5   | Trinexapac-ethyl, TMS derivative                                                                                                                             | 398   | 443     | 4.7   |             | mainlib |
|      |        | 6   | Phen-1,4-diol, 2,3-dimethyl-5-trifluoromethyl-                                                                                                               | 397   | 496     | 4.5   |             | mainlib |
|      |        | 7   | Carnegine                                                                                                                                                    | 387   | 461     | 3.2   | 490-53-9    | mainlib |
|      |        | 8   | Acetic acid, 17-acetoxy-4,4,10,13-tetramethyl-7-oxo-2,3,4,7,8,9,10,11,12,13,14,15,16,17-tetradecahydro-1H-cyclopenta[a]phenanthren-3-yl (ester)              | 386   | 403     | 3.0   |             | mainlib |
|      |        | 9   | Furan, 2,5-bis(3,4-dimethoxyphenyl)tetrahydro-3,4-dimethyl-, [2R-(2à,3à,4à,5à)]-                                                                             | 383   | 461     | 2.7   | 528-63-2    | replib  |
|      |        | 10  | (3-Benzenesulfonyl-4-isobutrylcyclopent-2-enyl)acetic acid, methyl ester                                                                                     | 373   | 453     | 1.9   |             | mainlib |

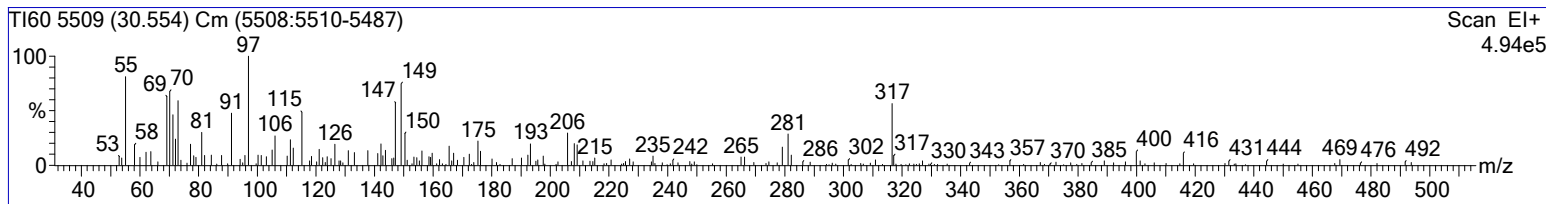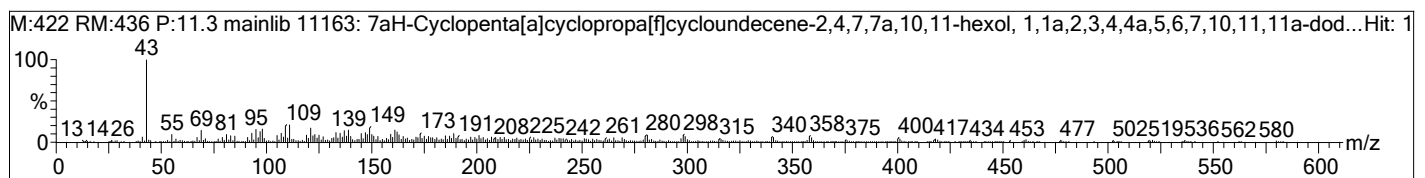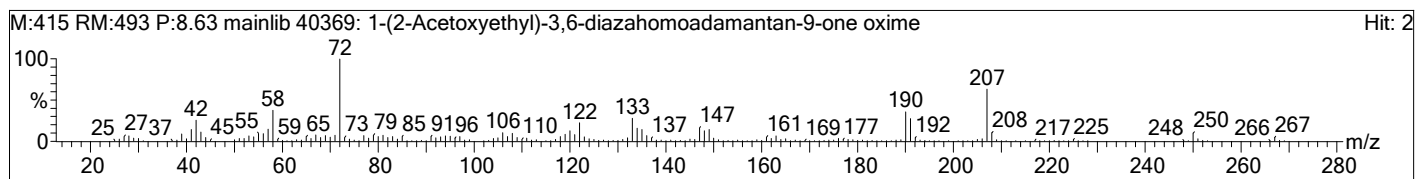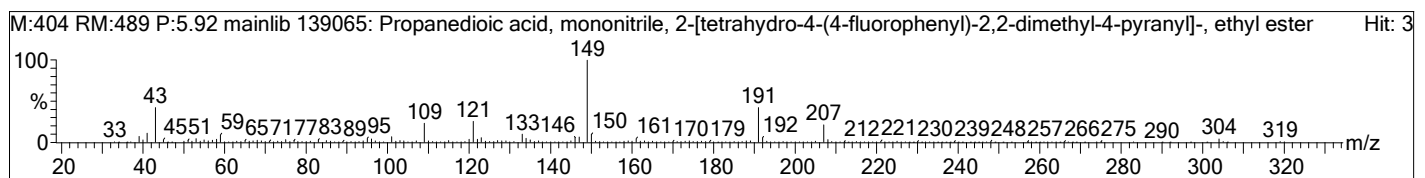

# TAMILNADU AGRICULTURAL UNIVERSITY - AGRICULTURAL MICROBIOLOGY

INSTRUMENT: PERKIN ELMER CLARUS SQ8C  
 INJECTION VOL: 1 MICRO LITER  
 SAMPLE ID : T160

COLOUMN: DB-5 MS CAPILARY STANDARD NON - POLARCOLOUMN  
 DIMENSION: 30Mts, ID: 0.25 mm, FILM: 0.25 IM CARRIER GAS: He

| #  | RT     | Scan | Height     | Area      | Area % | Norm % |
|----|--------|------|------------|-----------|--------|--------|
| 15 | 30.579 | 5514 | 11,865,328 | 581,444.2 | 0.933  | 13.51  |

| Pk # | RT     | Hit | Compound Name                                                                                                                                                                                                                   | Match | R.Match | Prob. | CAS        | Library |
|------|--------|-----|---------------------------------------------------------------------------------------------------------------------------------------------------------------------------------------------------------------------------------|-------|---------|-------|------------|---------|
| 15   | 30.579 | 1   | 7,8-Epoxy lanostan-11-ol, 3-acetoxy-                                                                                                                                                                                            | 411   | 423     | 4.8   |            | mainlib |
|      |        | 2   | Clocortolone pivalate                                                                                                                                                                                                           | 409   | 445     | 4.4   | 34097-16-0 | mainlib |
|      |        | 3   | 17-Pentatriacontene                                                                                                                                                                                                             | 400   | 461     | 3.2   | 6971-40-0  | replib  |
|      |        | 4   | Dodecanoic acid, 1a,2,5,5a,6,9,10,10a-octahydro-5a-hydroxy-4-(hydroxymethyl)-1,1,7,9-tetramethyl-6,11-dioxo-1H-2,8a-methanocyclopenta[a]cyclopropa[e]cyclodecen-5-yl ester, [1aR-(1aà,2à,5á,5aá,8aà,9à,10aà)]-                  | 399   | 399     | 3.1   | 77508-68-0 | mainlib |
|      |        | 5   | Stearic acid, 2-(9-octadecenyloxy)ethyl ester, (Z)-                                                                                                                                                                             | 396   | 490     | 2.7   | 29027-97-2 | mainlib |
|      |        | 6   | Cyclohexane, 1,3,5-trimethyl-2-octadecyl-                                                                                                                                                                                       | 394   | 413     | 2.5   | 55282-34-3 | mainlib |
|      |        | 7   | Heptadecane, 9-hexyl-                                                                                                                                                                                                           | 392   | 431     | 2.3   | 55124-79-3 | mainlib |
|      |        | 8   | 2-Nonadecanone 2,4-dinitrophenylhydrazine                                                                                                                                                                                       | 391   | 438     | 2.2   | 28813-61-8 | mainlib |
|      |        | 9   | 17-Pentatriacontene                                                                                                                                                                                                             | 390   | 421     | 3.2   | 6971-40-0  | mainlib |
|      |        | 10  | Tetradecanoic acid, 9a-(acetyloxy)-1a,1b,4,4a,5,7a,7b,8,9,9a-decahydro-7b-hydroxy-3-(hydroxymethyl)-4a-methoxy-1,1,6,8-tetramethyl-5-oxo-1H-cyclopropa[3,4]benz[1,2-e]azulen-9-yl ester, [1aR-(1aà,1bá,4aá,7aà,7bà,8à,9á,9aà)]- | 390   | 417     | 2.2   | 57716-89-9 | mainlib |

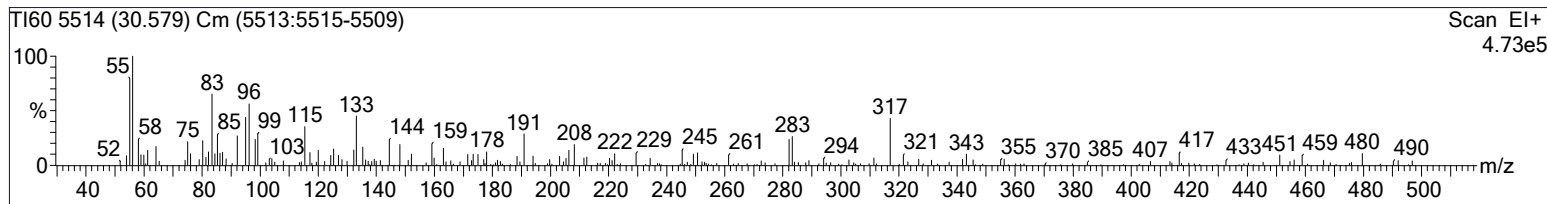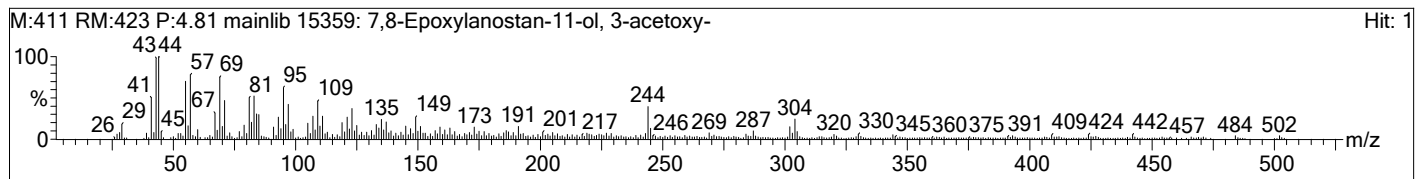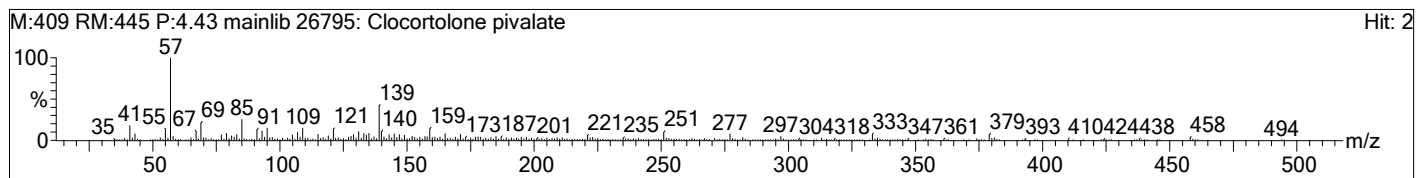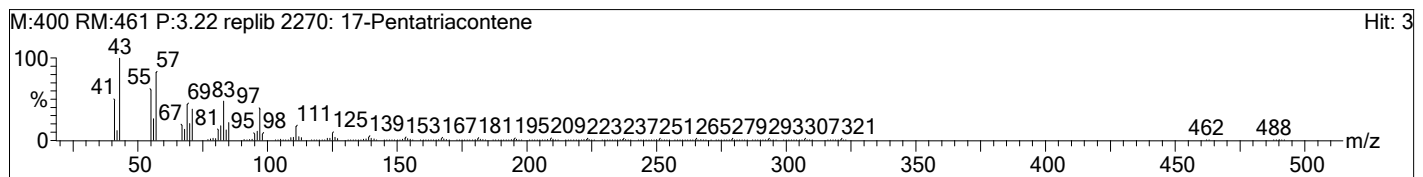

# TAMILNADU AGRICULTURAL UNIVERSITY - AGRICULTURAL MICROBIOLOGY

INSTRUMENT: PERKIN ELMER CLARUS SQ8C  
 INJECTION VOL: 1 MICRO LITER  
 SAMPLE ID : T160

COLOUMN: DB-5 MS CAPILARY STANDARD NON - POLARCOLOUMN  
 DIMENSION: 30Mts, ID: 0.25 mm, FILM: 0.25 IM CARRIER GAS: He

| #  | RT     | Scan | Height     | Area      | Area % | Norm % |
|----|--------|------|------------|-----------|--------|--------|
| 16 | 30.634 | 5525 | 11,048,982 | 417,876.8 | 0.670  | 9.71   |

| Pk # | RT     | Hit | Compound Name                                                                                                                                                                                                                                                                 | Match | R.Match | Prob. | CAS         | Library   |
|------|--------|-----|-------------------------------------------------------------------------------------------------------------------------------------------------------------------------------------------------------------------------------------------------------------------------------|-------|---------|-------|-------------|-----------|
| 16   | 30.634 | 1   | Clonazepam                                                                                                                                                                                                                                                                    | 517   | 950     | 61.3  | 1622-61-3   | nist_msms |
|      |        | 2   | 9-Borabicyclo[3.3.1]nonane, 9,9'-[1,4-phenylenebis(carbonothioylthio)]bis-                                                                                                                                                                                                    | 380   | 452     | 2.2   | 139759-17-4 | mainlib   |
|      |        | 3   | Clonazepam                                                                                                                                                                                                                                                                    | 377   | 807     | 61.3  | 1622-61-3   | nist_msms |
|      |        | 4   | Pregnan-18-oic acid, 20-hydroxy-, $\zeta$ -lactone, (5 $\alpha$ )-                                                                                                                                                                                                            | 366   | 490     | 1.4   | 56143-34-1  | mainlib   |
|      |        | 5   | Pregnan-18-oic acid, 20-hydroxy-, (5 $\alpha$ )-                                                                                                                                                                                                                              | 364   | 468     | 1.3   | 56143-33-0  | mainlib   |
|      |        | 6   | 2-Thiophenecarboxaldehyde, 5-ethynyl-, (2,4-dinitrophenyl)hydrazone                                                                                                                                                                                                           | 363   | 461     | 1.2   | 56588-21-7  | mainlib   |
|      |        | 7   | 16-Hydroxymethyleneandrost-5-en-3-ol-17-one                                                                                                                                                                                                                                   | 362   | 441     | 1.2   |             | mainlib   |
|      |        | 8   | Dodecanoic acid, 1a,2,5,5a,6,9,10,10a-octahydro-5a-hydroxy-4-(hydroxymethyl)-1,1,7,9-tetramethyl-6,11-dioxo-1H-2,8a-methanocyclopenta[a]cyclopropa[e]cyclodecen-5-yl ester, [1aR-(1a $\alpha$ ,2 $\alpha$ ,5 $\alpha$ ,5a $\alpha$ ,8a $\alpha$ ,9 $\alpha$ ,10a $\alpha$ )]- | 359   | 359     | 1.0   | 77508-68-0  | mainlib   |
|      |        | 9   | 17 $\alpha$ -Methyl-3 $\alpha$ -methoxy-17 $\alpha$ -aza-D-homoandrost-5-ene-17-one                                                                                                                                                                                           | 356   | 440     | 0.9   | 149942-10-9 | mainlib   |
|      |        | 10  | 2-Phenanthrenecarboxylic acid, 1-(1,3-dithian-2-ylmethyl)-7-hydroxy-2,4b-dimethyl-1,2,3,4,4a,4b,5,6,7,8,10,10a-dodecahydro-, methyl ester                                                                                                                                     | 356   | 439     | 0.9   |             | mainlib   |

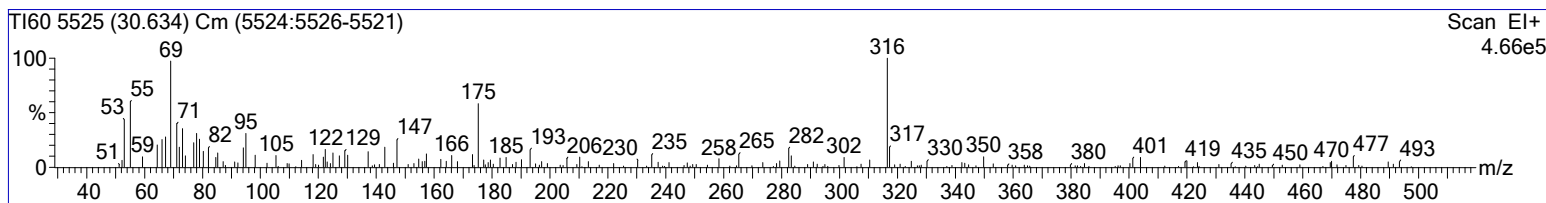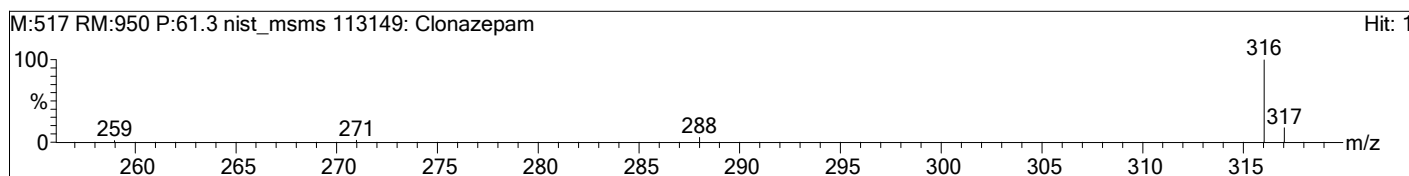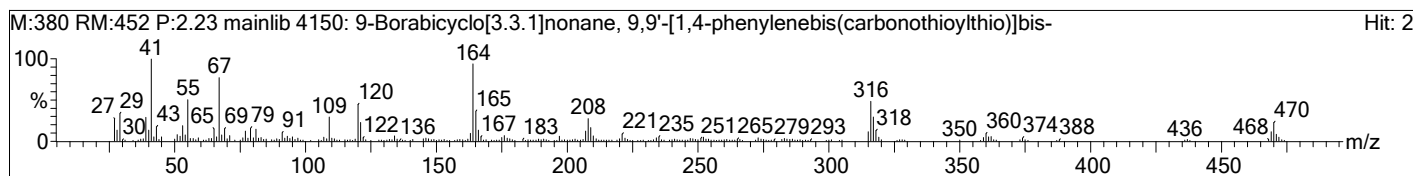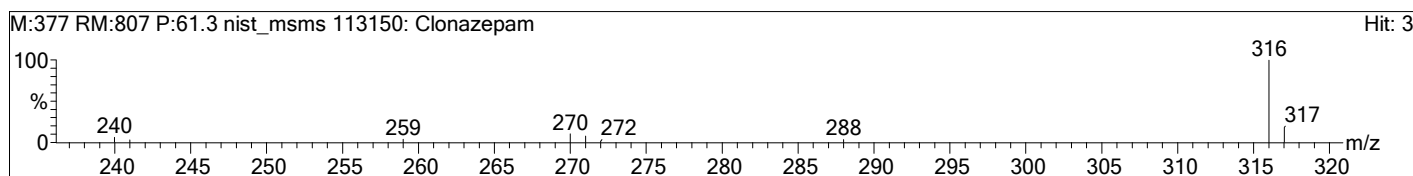



# TAMILNADU AGRICULTURAL UNIVERSITY - AGRICULTURAL MICROBIOLOGY

INSTRUMENT: PERKIN ELMER CLARUS SQ8C  
 INJECTION VOL: 1 MICRO LITER  
 SAMPLE ID : T160

COLOUMN: DB-5 MS CAPILARY STANDARD NON - POLARCOLOUMN  
 DIMENSION: 30Mts, ID: 0.25 mm, FILM: 0.25 IM CARRIER GAS: He

| #  | RT     | Scan | Height     | Area      | Area % | Norm % |
|----|--------|------|------------|-----------|--------|--------|
| 17 | 30.699 | 5538 | 10,361,085 | 670,193.8 | 1.075  | 15.57  |

| Pk # | RT     | Hit | Compound Name                                                                                                                                                                                                                                  | Match | R.Match | Prob. | CAS        | Library |
|------|--------|-----|------------------------------------------------------------------------------------------------------------------------------------------------------------------------------------------------------------------------------------------------|-------|---------|-------|------------|---------|
| 17   | 30.699 | 1   | 17á-Acetoxy-1',1'-dicarboethoxy-1á,2á-dihydro-17á-methyl-3'H-cycloprop[1,2]-5á-androst-1-en-3-one                                                                                                                                              | 421   | 432     | 17.0  | 80097-22-9 | mainlib |
|      |        | 2   | Oleic acid, eicosyl ester                                                                                                                                                                                                                      | 395   | 428     | 5.1   | 22393-88-0 | mainlib |
|      |        | 3   | 2-Nonadecanone 2,4-dinitrophenylhydrazine                                                                                                                                                                                                      | 389   | 431     | 4.0   | 28813-61-8 | mainlib |
|      |        | 4   | 4H-Cyclopropa[5',6']benz[1',2':7,8]azuleno[5,6]oxiren-4-one, 8,8a-bis(acetyloxy)-2a-[(acetyloxy)methyl]-1,1a,1b,1c,2a,3,3a,6a,6b,7,8,8a-dodecahydro-6b-hydroxy-3a-methoxy-1,1,5,7-tetramethyl-, [1aR-(1aà,1bá,1cá,2aá,3aà,6aà,6bà,7à,8á,8aà)]- | 379   | 397     | 2.8   | 64838-69-3 | mainlib |
|      |        | 5   | 9-Octadecenoic acid (Z)-, octadecyl ester                                                                                                                                                                                                      | 378   | 413     | 2.7   | 17673-49-3 | mainlib |
|      |        | 6   | Coumarin-6-ol, 3,4-dihydro-4,4-dimethyl-5,7-dinitro-                                                                                                                                                                                           | 376   | 472     | 2.5   |            | mainlib |
|      |        | 7   | 2,5-Furandione, dihydro-3-octadecyl-                                                                                                                                                                                                           | 368   | 431     | 1.9   | 47458-32-2 | mainlib |
|      |        | 8   | Oleyl oleate                                                                                                                                                                                                                                   | 368   | 392     | 1.9   | 3687-45-4  | replib  |
|      |        | 9   | 12-Hydroxyoctadecanethioic acid, S-t-butyl ester                                                                                                                                                                                               | 367   | 466     | 1.8   | 58587-08-9 | mainlib |
|      |        | 10  | Oleic Acid                                                                                                                                                                                                                                     | 365   | 450     | 1.6   | 112-80-1   | replib  |

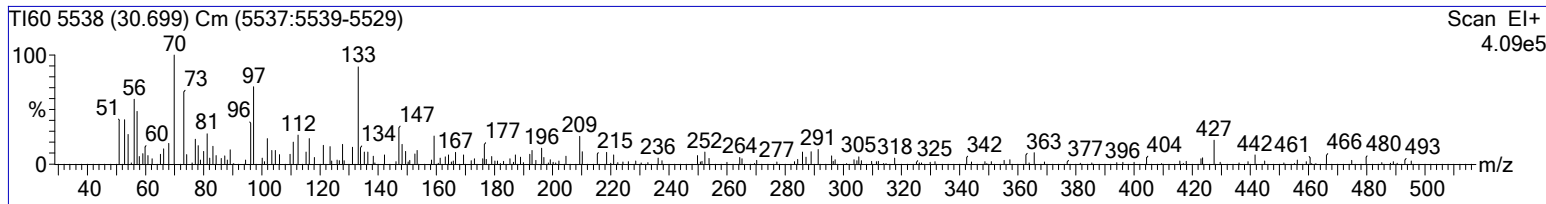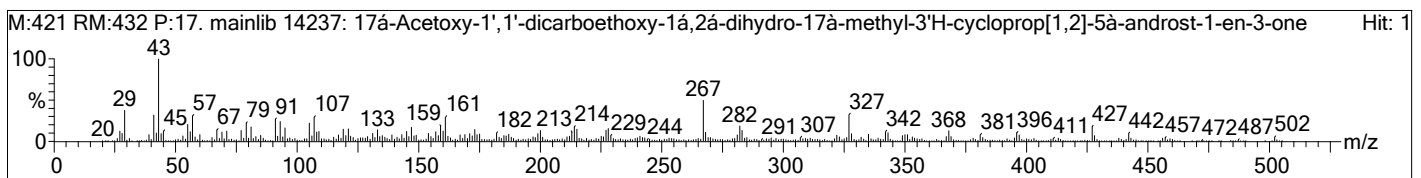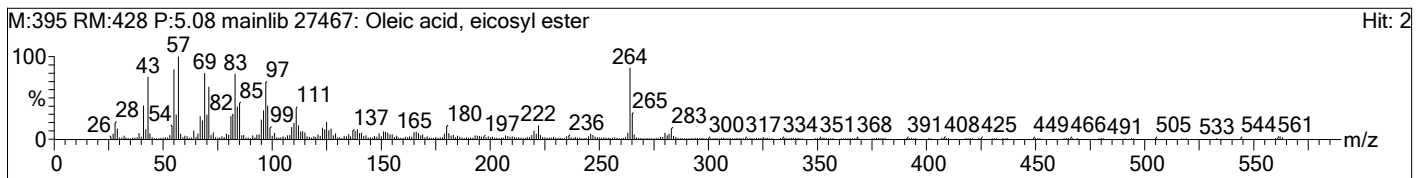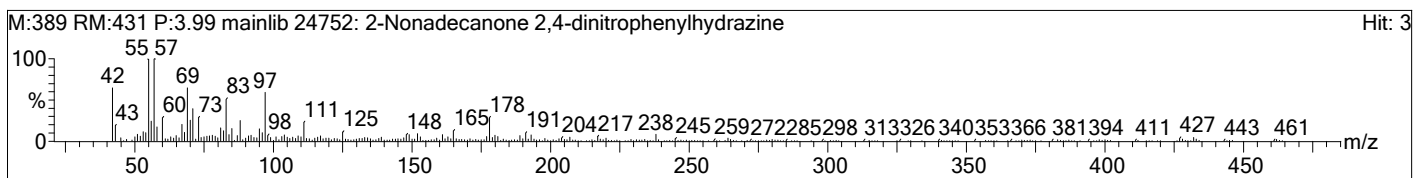

# TAMILNADU AGRICULTURAL UNIVERSITY - AGRICULTURAL MICROBIOLOGY

INSTRUMENT: PERKIN ELMER CLARUS SQ8C  
 INJECTION VOL: 1 MICRO LITER  
 SAMPLE ID : T160

COLOUMN: DB-5 MS CAPILARY STANDARD NON - POLARCOLOUMN  
 DIMENSION: 30Mts, ID: 0.25 mm, FILM: 0.25 IM CARRIER GAS: He

| #  | RT     | Scan | Height     | Area      | Area % | Norm % |
|----|--------|------|------------|-----------|--------|--------|
| 18 | 30.759 | 5550 | 10,673,964 | 600,823.9 | 0.964  | 13.96  |

| PK # | RT     | Hit | Compound Name                                                        | Match | R.Match | Prob. | CAS         | Library |
|------|--------|-----|----------------------------------------------------------------------|-------|---------|-------|-------------|---------|
| 18   | 30.759 | 1   | 9,19-Cyclolanostan-3-ol, 24,24-epoxymethano-, acetate                | 388   | 412     | 9.5   |             | mainlib |
|      |        | 2   | Pregnan-20-one, 5,6-epoxy-3,17-dihydroxy-16-methyl-, (3á,5à,6à,16à)- | 377   | 414     | 6.5   | 56630-87-6  | mainlib |
|      |        | 3   | 1-(á-d-Arabinofuranosyl)-4-difluoromethyl-5-bromouracil              | 371   | 474     | 5.1   | 102302-68-1 | mainlib |
|      |        | 4   | Pregnan-20-one, 3,11-dihydroxy-, (3á,5à,11à)-                        | 367   | 440     | 4.3   | 565-91-3    | mainlib |
|      |        | 5   | 16-Allopregnen-3á-ol-20-one                                          | 363   | 433     | 3.7   | 566-61-0    | mainlib |
|      |        | 6   | d-Mannitol, 1-decylsulfonyl-                                         | 362   | 484     | 3.5   |             | mainlib |
|      |        | 7   | 3á-Acetoxy-17á-methyl-16-d-homoandrosten-17a-one                     | 359   | 505     | 3.1   |             | mainlib |
|      |        | 8   | Pregnenolone                                                         | 352   | 404     | 2.4   | 145-13-1    | mainlib |
|      |        | 9   | 9,19-Cyclo-25,26-epoxyergostan-3-ol, 4,4,14-trimethyl-, acetate      | 352   | 376     | 2.4   |             | mainlib |
|      |        | 10  | 1-(á-d-Ribofuranosyl)-4-difluoromethyl-5-bromouracil                 | 351   | 463     | 2.3   | 102302-61-4 | mainlib |

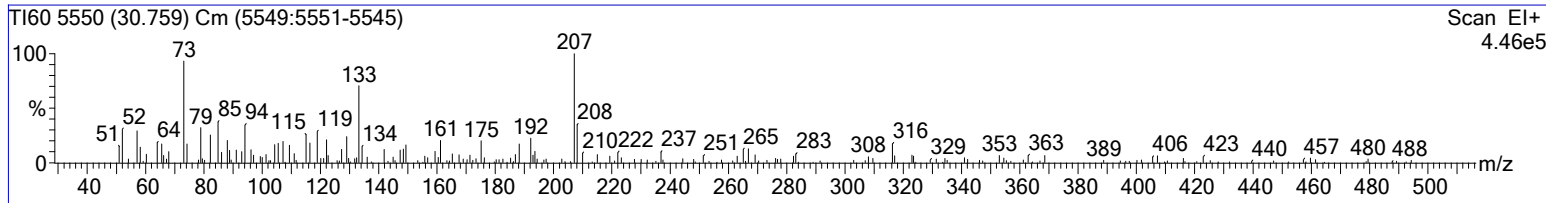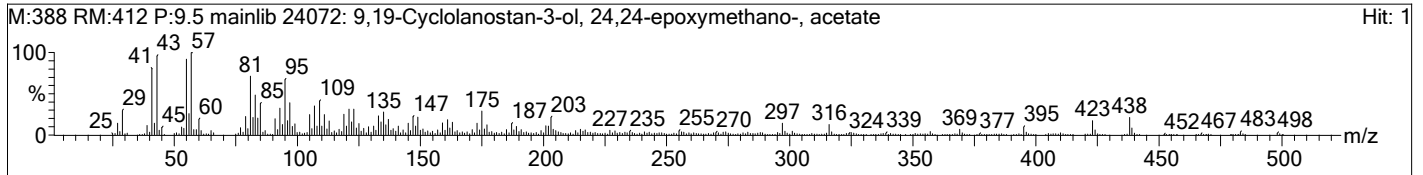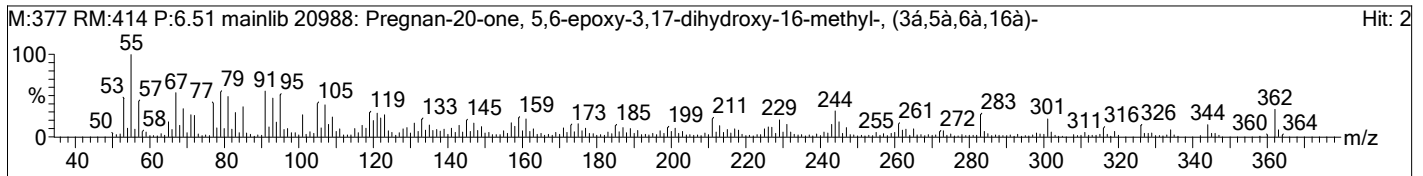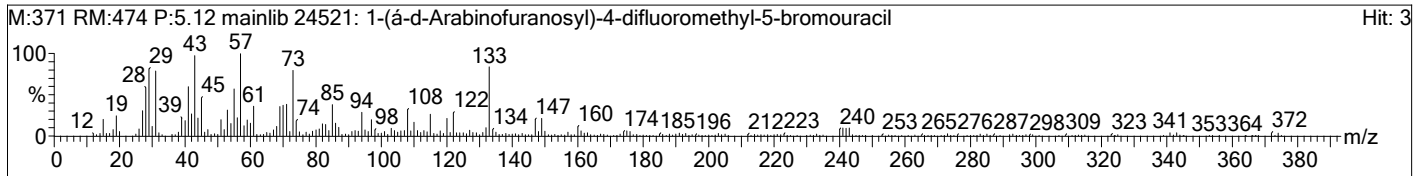

# TAMILNADU AGRICULTURAL UNIVERSITY - AGRICULTURAL MICROBIOLOGY

INSTRUMENT: PERKIN ELMER CLARUS SQ8C  
 INJECTION VOL: 1 MICRO LITER  
 SAMPLE ID : T160

COLOUMN: DB-5 MS CAPILARY STANDARD NON - POLARCOLOUMN  
 DIMENSION: 30Mts, ID: 0.25 mm, FILM: 0.25 IM CARRIER GAS: He

| #  | RT     | Scan | Height    | Area      | Area % | Norm % |
|----|--------|------|-----------|-----------|--------|--------|
| 19 | 30.919 | 5582 | 8,685,801 | 345,571.8 | 0.554  | 8.03   |

| Pk # | RT     | Hit | Compound Name                                                                                                     | Match | R.Match | Prob. | CAS         | Library |
|------|--------|-----|-------------------------------------------------------------------------------------------------------------------|-------|---------|-------|-------------|---------|
| 19   | 30.919 | 1   | 3-Isopropyl-6a,10b-dimethyl-8-(2-oxo-2-phenyl-ethyl)-dodecahydro-benzo[f]chromen-7-one                            | 411   | 459     | 11.9  |             | mainlib |
|      |        | 2   | 3-Isopropyl-6a,7,10b-trimethyl-8-(2-oxo-2-phenylethyl)dodecahydrobenzo[f]chromene-7-carboxylic acid, methyl ester | 407   | 421     | 10.0  |             | mainlib |
|      |        | 3   | .psi.,.psi.-Carotene, 1,1',2,2'-tetrahydro-1,1'-dimethoxy-                                                        | 404   | 405     | 8.9   | 13833-01-7  | mainlib |
|      |        | 4   | d-Mannitol, 1-decylsulfonyl-                                                                                      | 390   | 494     | 5.5   |             | mainlib |
|      |        | 5   | Thymol, TBDMS derivative                                                                                          | 379   | 558     | 3.8   | 330455-64-6 | mainlib |
|      |        | 6   | 9-Octadecenoic acid, (2-phenyl-1,3-dioxolan-4-yl)methyl ester, cis-                                               | 379   | 419     | 3.8   | 56599-45-2  | mainlib |
|      |        | 7   | 4,4,6a,6b,8a,11,11,14b-Octamethyl-docosahydropicen-3-ol                                                           | 373   | 400     | 3.0   |             | mainlib |
|      |        | 8   | 2-Picenol, 4,4,6a,6b,8a,11,11,14b-octamethylperhydro                                                              | 372   | 391     | 2.9   |             | mainlib |
|      |        | 9   | Sebacic acid, 4-bromo-2,6-difluorobenzyl isobutyl ester                                                           | 370   | 422     | 2.7   |             | mainlib |
|      |        | 10  | Sebacic acid, 4-bromo-2,6-difluorobenzyl propyl ester                                                             | 370   | 420     | 2.7   |             | mainlib |

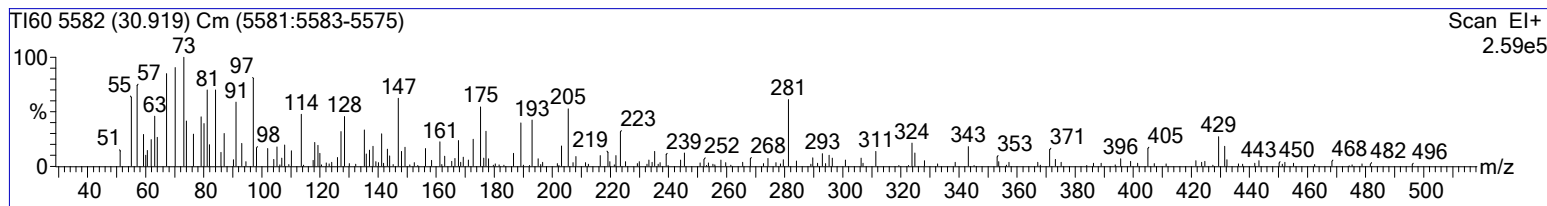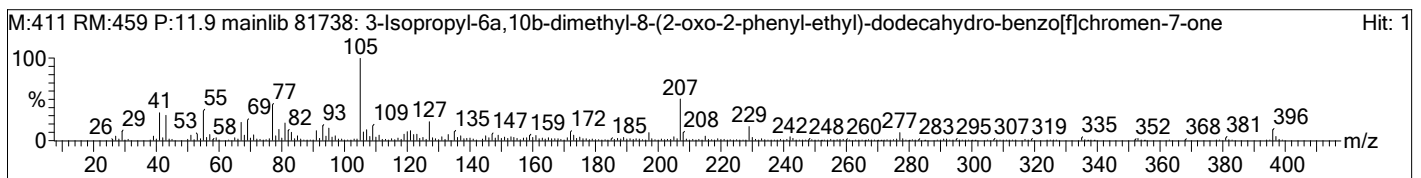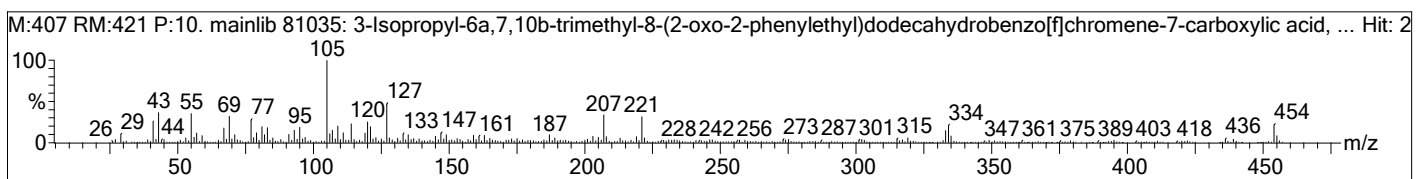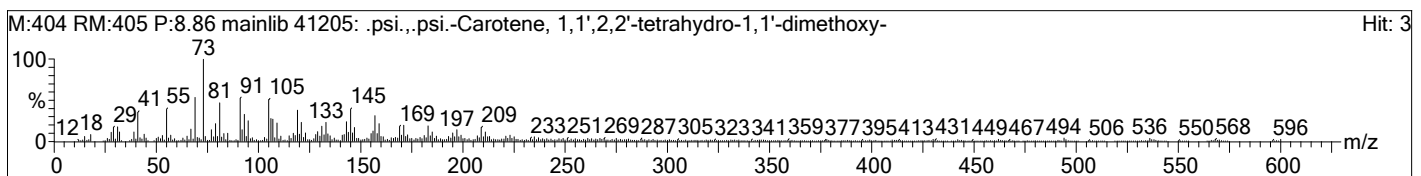

# TAMILNADU AGRICULTURAL UNIVERSITY - AGRICULTURAL MICROBIOLOGY

INSTRUMENT: PERKIN ELMER CLARUS SQ8C  
 INJECTION VOL: 1 MICRO LITER  
 SAMPLE ID : T160

COLOUMN: DB-5 MS CAPILARY STANDARD NON - POLARCOLOUMN  
 DIMENSION: 30Mts, ID: 0.25 mm, FILM: 0.25 IM CARRIER GAS: He

| #  | RT     | Scan | Height    | Area      | Area % | Norm % |
|----|--------|------|-----------|-----------|--------|--------|
| 20 | 31.009 | 5600 | 8,529,466 | 270,024.3 | 0.433  | 6.27   |

| Pk # | RT     | Hit | Compound Name                                                                             | Match | R.Match | Prob. | CAS        | Library |
|------|--------|-----|-------------------------------------------------------------------------------------------|-------|---------|-------|------------|---------|
| 20   | 31.009 | 1   | 17-(1,5-Dimethylhexyl)-10,13-dimethyl-3-styrylhexadecahydrocyclopenta[a]phenanthren-2-one | 426   | 440     | 19.5  |            | mainlib |
|      |        | 2   | Octadecane, 3-ethyl-5-(2-ethylbutyl)-                                                     | 421   | 457     | 15.7  | 55282-12-7 | mainlib |
|      |        | 3   | 1,3-Dioxane, 4-(2-bromo-1-hydroxyethyl)-5,6-dimethyl-2-phenyl-                            | 392   | 486     | 4.4   |            | mainlib |
|      |        | 4   | Octadecane, 5,14-dibutyl-                                                                 | 383   | 443     | 3.2   | 55282-13-8 | mainlib |
|      |        | 5   | Heptadecane, 9-hexyl-                                                                     | 382   | 433     | 3.1   | 55124-79-3 | mainlib |
|      |        | 6   | Octadecane, 3-ethyl-5-(2-ethylbutyl)-                                                     | 377   | 451     | 15.7  | 55282-12-7 | replib  |
|      |        | 7   | 1-Dodecanol, 3,7,11-trimethyl-                                                            | 370   | 502     | 2.1   | 6750-34-1  | replib  |
|      |        | 8   | 1-Chloroeicosane                                                                          | 370   | 454     | 2.1   | 42217-02-7 | mainlib |
|      |        | 9   | 4-Methyldocosane                                                                          | 364   | 480     | 1.6   | 25117-30-0 | mainlib |
|      |        | 10  | Tetratetracontane                                                                         | 364   | 417     | 1.6   | 7098-22-8  | replib  |

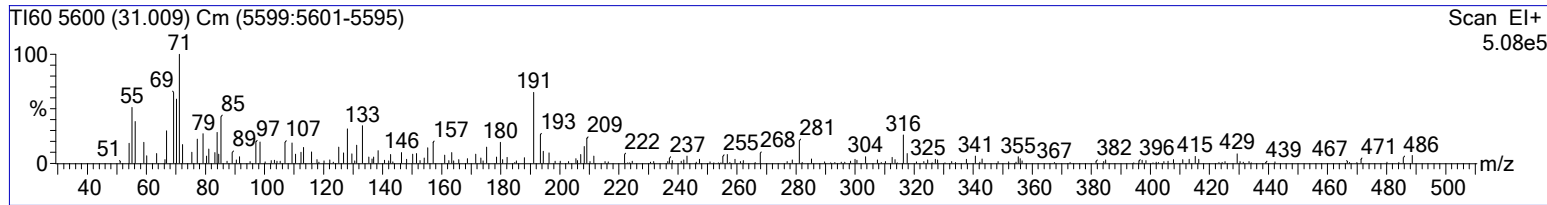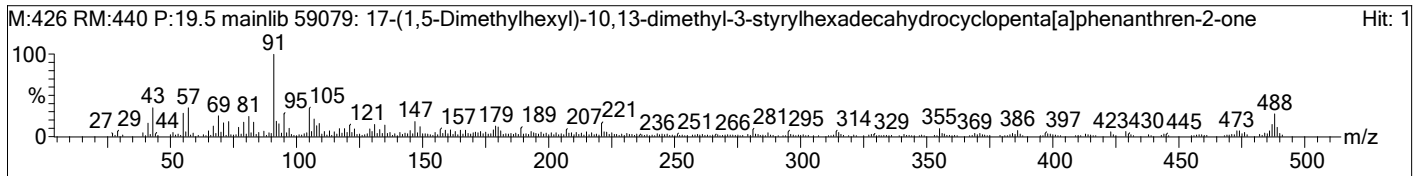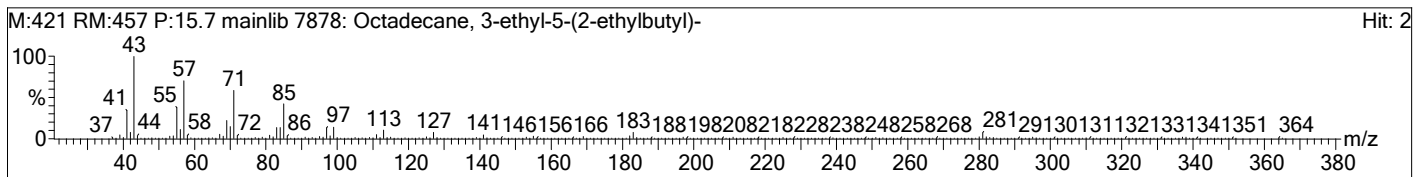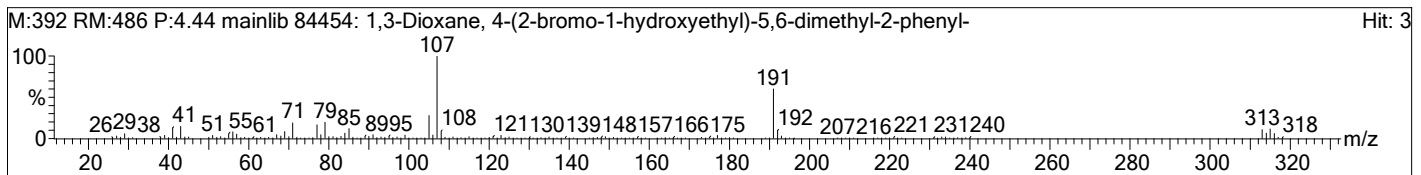

# TAMILNADU AGRICULTURAL UNIVERSITY - AGRICULTURAL MICROBIOLOGY

INSTRUMENT: PERKIN ELMER CLARUS SQ8C  
 INJECTION VOL: 1 MICRO LITER  
 SAMPLE ID : T160

COLOUMN: DB-5 MS CAPILARY STANDARD NON - POLARCOLOUMN  
 DIMENSION: 30Mts, ID: 0.25 mm, FILM: 0.25 IM CARRIER GAS: He

| #  | RT     | Scan | Height    | Area      | Area % | Norm % |
|----|--------|------|-----------|-----------|--------|--------|
| 21 | 31.069 | 5612 | 7,490,828 | 326,423.5 | 0.524  | 7.58   |

| PK # | RT     | Hit | Compound Name                                                                                          | Match | R.Match | Prob. | CAS        | Library |
|------|--------|-----|--------------------------------------------------------------------------------------------------------|-------|---------|-------|------------|---------|
| 21   | 31.069 | 1   | (+)-Prostaglandin F2 $\alpha$ , 4TMS derivative                                                        | 356   | 377     | 7.5   | 50669-95-9 | mainlib |
|      |        | 2   | 2-Thiophenecarboxylic acid, 4-(chloromethyl)-5-nonyl-, methyl ester                                    | 341   | 426     | 4.5   | 59782-43-3 | mainlib |
|      |        | 3   | Butyl 9-octadecenoate or 9-18:1                                                                        | 340   | 429     | 4.4   |            | mainlib |
|      |        | 4   | Allopegnan-3 $\alpha$ ,9 $\alpha$ -diol-20-one                                                         | 332   | 410     | 3.2   |            | mainlib |
|      |        | 5   | Acetylandromedol                                                                                       | 330   | 401     | 3.0   | 4720-09-6  | mainlib |
|      |        | 6   | cis-10-Pentadecenoic acid, isobutyl ester                                                              | 327   | 507     | 2.7   |            | mainlib |
|      |        | 7   | Acetic acid, 3,4-diacetoxy-7-cyano-1,4a,7-trimethyl-8-(2-oxoethyl)tetradecahydrophenanthren-2-yl ester | 325   | 348     | 2.4   |            | mainlib |
|      |        | 8   | i-Propyl 11,12-methylene-octadecanoate                                                                 | 323   | 434     | 2.2   |            | mainlib |
|      |        | 9   | 1,1,2,2,4,4-Hexa-t-butyl-3,5-dioxa-1,2,4-trisilolane                                                   | 322   | 405     | 2.2   | 93194-13-9 | mainlib |
|      |        | 10  | 3-Methoxy-D-homoestra-1,3,5(10)-trien-14 $\alpha$ ,17 $\alpha$ -diol (.8 $\alpha$ .)                   | 319   | 490     | 1.9   |            | mainlib |

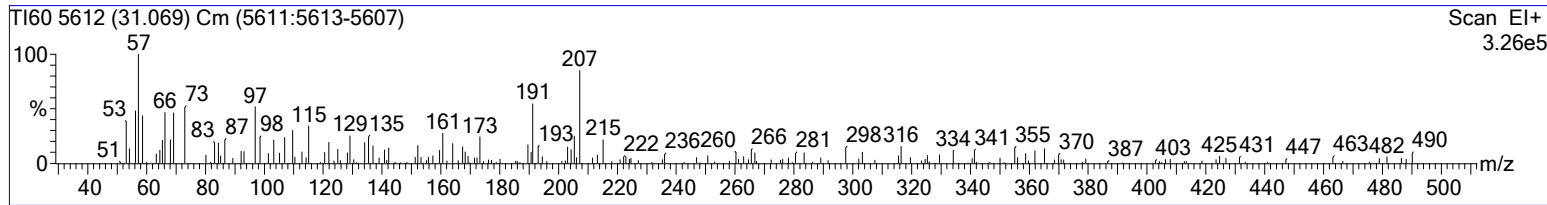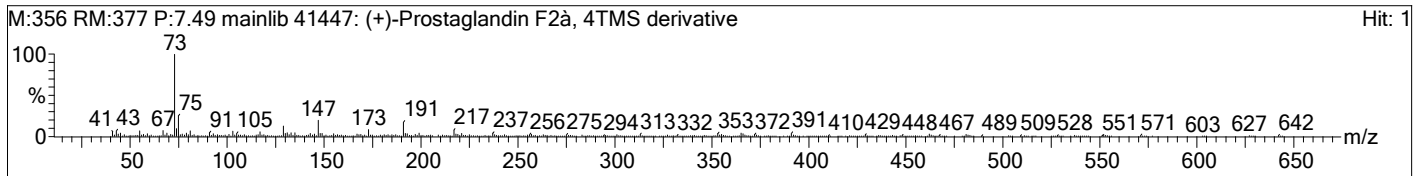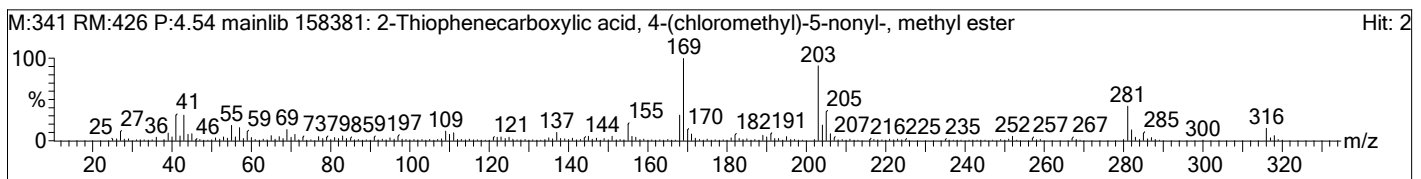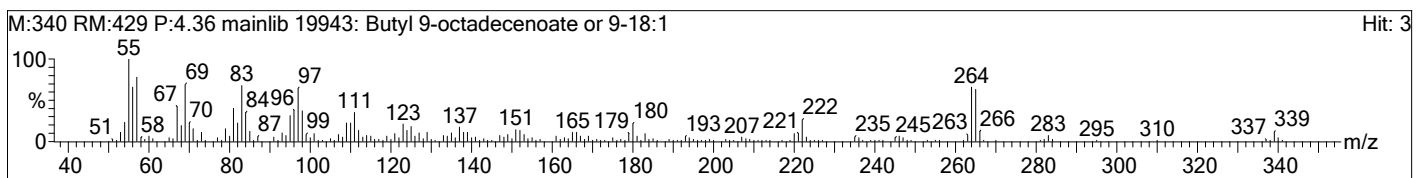

# TAMILNADU AGRICULTURAL UNIVERSITY - AGRICULTURAL MICROBIOLOGY

INSTRUMENT: PERKIN ELMER CLARUS SQ8C  
 INJECTION VOL: 1 MICRO LITER  
 SAMPLE ID : T160

COLOUMN: DB-5 MS CAPILARY STANDARD NON - POLARCOLOUMN  
 DIMENSION: 30Mts, ID: 0.25 mm, FILM: 0.25 IM CARRIER GAS: He

| #  | RT     | Scan | Height    | Area      | Area % | Norm % |
|----|--------|------|-----------|-----------|--------|--------|
| 22 | 31.124 | 5623 | 6,563,559 | 607,000.8 | 0.974  | 14.10  |

| Pk # | RT     | Hit | Compound Name                                                                                         | Match | R.Match | Prob. | CAS         | Library |
|------|--------|-----|-------------------------------------------------------------------------------------------------------|-------|---------|-------|-------------|---------|
| 22   | 31.124 | 1   | Strychane, 1-acetyl-20à-hydroxy-16-methylene-                                                         | 379   | 432     | 20.2  | 2111-98-0   | mainlib |
|      |        | 2   | Propanoic acid, 2-(3-acetoxy-4,4,14-trimethylandro-8-en-17-yl)-                                       | 377   | 395     | 18.6  |             | mainlib |
|      |        | 3   | 2,6-Dihydroxyacetophenone, 2TMS derivative                                                            | 346   | 400     | 5.1   |             | mainlib |
|      |        | 4   | Aspidospermidine, 1,2-didehydro-, (5à,12á,19à)-                                                       | 339   | 422     | 3.9   | 56245-51-3  | mainlib |
|      |        | 5   | 2,4-Dihydroxyacetophenone, 2TMS derivative                                                            | 339   | 394     | 3.9   |             | mainlib |
|      |        | 6   | Carbamic acid, N-[10,11-dihydro-5-(2-methylamino-1-oxoethyl)-3-5H-dibenzo[b,f]azepinyl]-, ethyl ester | 339   | 391     | 3.9   | 102821-92-1 | mainlib |
|      |        | 7   | Acridin-1(2H)-one, 3,4-dihydro-9-allylamino-3,3-dimethyl-                                             | 338   | 393     | 3.7   | 300359-68-6 | mainlib |
|      |        | 8   | 2,5-Ethano-2H-azocino[4,3-b]indole, 4-ethylidene-1,3,4,5,6,7-hexahydro-6-methylene-, [r-(E)]-         | 335   | 419     | 3.3   | 3463-93-2   | mainlib |
|      |        | 9   | 1-Methoxy-4-nitro-2,3,5,6-tetramethylbenzene                                                          | 325   | 484     | 2.3   | 52415-08-4  | mainlib |
|      |        | 10  | Glycine, N-[(3à,5á)-24-oxo-3-[(trimethylsilyl)oxy]cholan-24-yl]-, methyl ester                        | 323   | 369     | 2.1   | 57326-15-5  | mainlib |

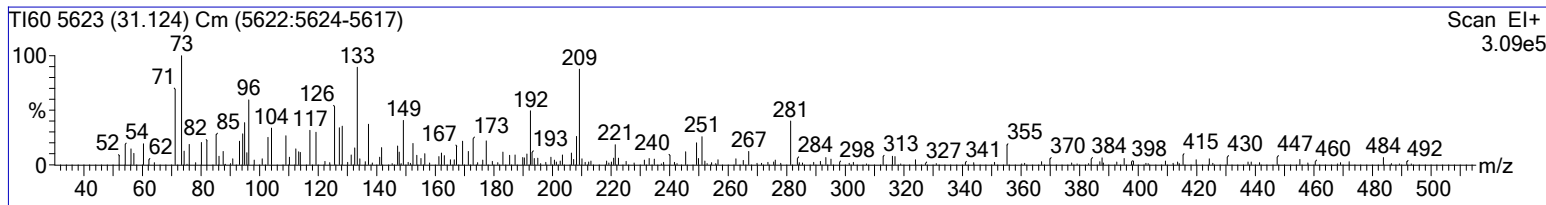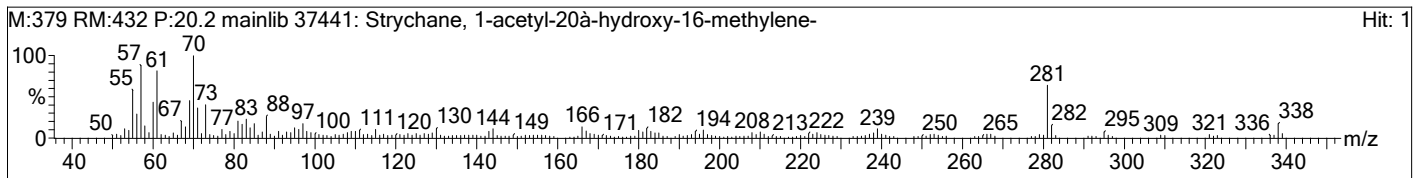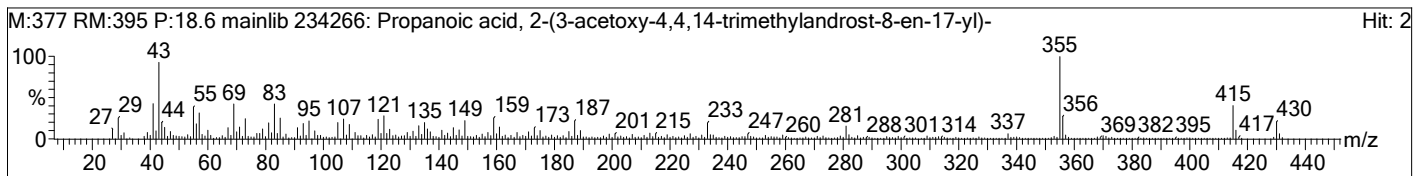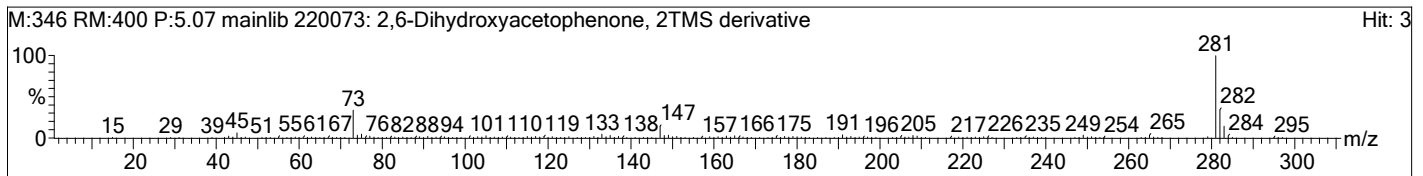

# TAMILNADU AGRICULTURAL UNIVERSITY - AGRICULTURAL MICROBIOLOGY

INSTRUMENT: PERKIN ELMER CLARUS SQ8C  
 INJECTION VOL: 1 MICRO LITER  
 SAMPLE ID : T160

COLOUMN: DB-5 MS CAPILARY STANDARD NON - POLARCOLOUMN  
 DIMENSION: 30Mts, ID: 0.25 mm, FILM: 0.25 IM CARRIER GAS: He

| #  | RT     | Scan | Height    | Area      | Area % | Norm % |
|----|--------|------|-----------|-----------|--------|--------|
| 23 | 31.530 | 5704 | 5,010,848 | 273,521.4 | 0.439  | 6.36   |

| Pk # | RT     | Hit | Compound Name                                                                                                                                                 | Match | R.Match | Prob. | CAS        | Library |
|------|--------|-----|---------------------------------------------------------------------------------------------------------------------------------------------------------------|-------|---------|-------|------------|---------|
| 23   | 31.530 | 1   | Pregn-5-ene-3,11-dione, 17,20:20,21-bis[methylenebis(oxy)]-, cyclic 3-(1,2-ethanediyl acetal)                                                                 | 373   | 423     | 9.9   | 52248-40-5 | mainlib |
|      |        | 2   | Octadecanoic acid, (2-phenyl-1,3-dioxolan-4-yl)methyl ester, cis-                                                                                             | 372   | 427     | 9.5   | 56599-88-3 | mainlib |
|      |        | 3   | (5á)Pregnane-3,20á-diol, 14à,18à-[4-methyl-3-oxo-(1-oxa-4-azabutane-1,4-diyl)]-, diacetate                                                                    | 369   | 393     | 8.4   |            | mainlib |
|      |        | 4   | 7aH-Cyclopenta[a]cyclopropa[f]cycloundecene-2, 4,7,7a,10,11-hexol, 1,1a,2,3,4,4a,5,6,7,10,11,11a-dodecahydro-1,1,3,6,9-pentamethyl-, 2,4,7,10,11-pentaacetate | 362   | 386     | 6.4   | 51906-08-2 | mainlib |
|      |        | 5   | Cholestan-3-one, cyclic 1,2-ethanediyl aetal, (5á)-                                                                                                           | 353   | 409     | 4.7   | 25328-53-4 | mainlib |
|      |        | 6   | Propenenitrile, 2-(4-chlorophenylsulfonyl)-3-cyclohexylamino-                                                                                                 | 345   | 411     | 3.5   |            | mainlib |
|      |        | 7   | Spirost-8-en-11-one, 3-hydroxy-, (3á,5à,14á,20á,22á,25R)-                                                                                                     | 338   | 386     | 2.7   | 58072-54-1 | mainlib |
|      |        | 8   | 18,19-Secoyohimban-19-oic acid, 16,17,20,21-tetradecydro-16-(hydroxymethyl)-, methyl ester, (15á,16E)-                                                        | 334   | 424     | 2.3   | 5523-49-9  | mainlib |
|      |        | 9   | Stearic acid, 2-phenyl-m-dioxan-5-yl ester, trans-                                                                                                            | 329   | 368     | 1.8   | 10564-35-9 | mainlib |
|      |        | 10  | 3'H-Cycloprop(1,2)-5-cholest-1-en-3-one, 1'-carboethoxy-1'-cyano-1,2-dihydro-                                                                                 | 329   | 338     | 1.8   | 75857-80-6 | mainlib |

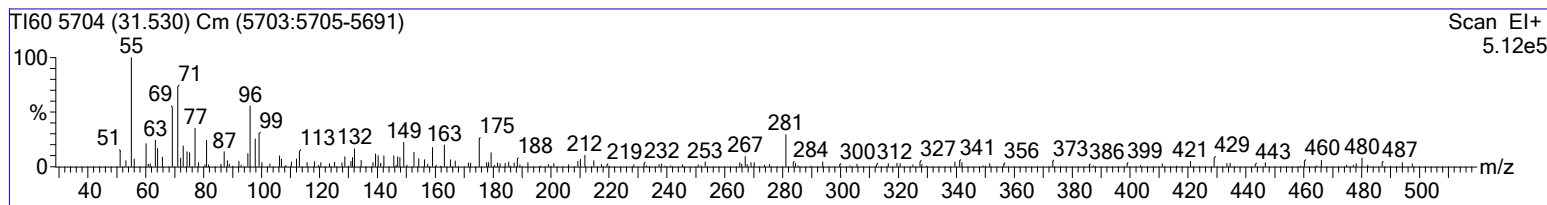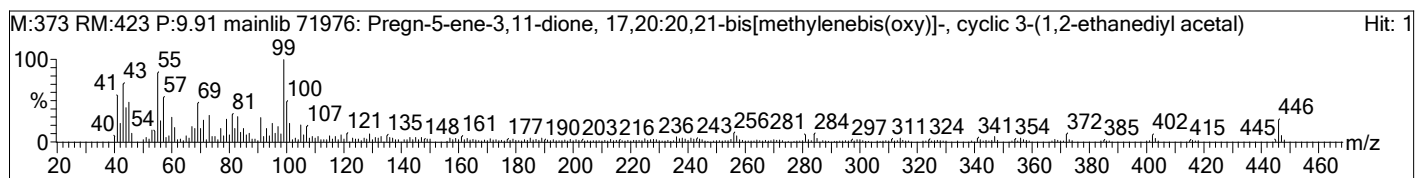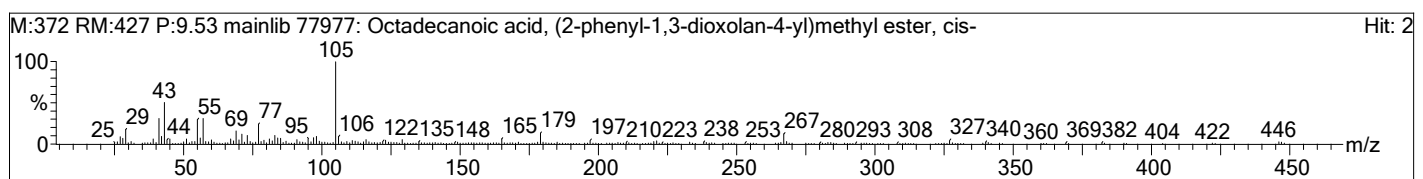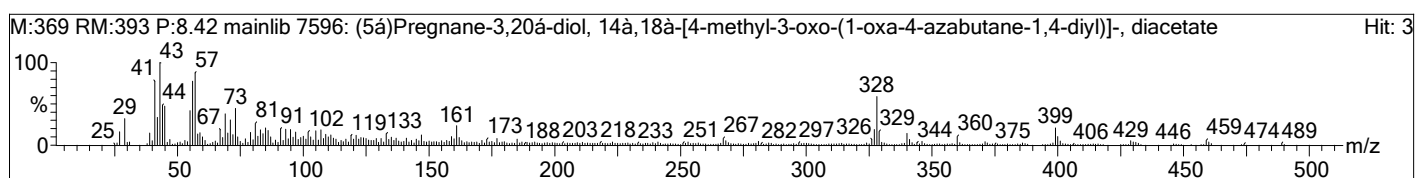

# TAMILNADU AGRICULTURAL UNIVERSITY - AGRICULTURAL MICROBIOLOGY

INSTRUMENT: PERKIN ELMER CLARUS SQ8C  
 INJECTION VOL: 1 MICRO LITER  
 SAMPLE ID : T160

COLOUMN: DB-5 MS CAPILARY STANDARD NON - POLARCOLOUMN  
 DIMENSION: 30Mts, ID: 0.25 mm, FILM: 0.25 IM CARRIER GAS: He

| #  | RT     | Scan | Height    | Area      | Area % | Norm % |
|----|--------|------|-----------|-----------|--------|--------|
| 24 | 32.625 | 5923 | 7,678,466 | 348,128.7 | 0.559  | 8.09   |

| PK # | RT     | Hit | Compound Name                                                                                  | Match | R.Match | Prob. | CAS         | Library |
|------|--------|-----|------------------------------------------------------------------------------------------------|-------|---------|-------|-------------|---------|
| 24   | 32.625 | 1   | Phosphorothioic acid, O-(4,5-dichloro-2-methoxyphenyl) O,O-dimethyl ester                      | 468   | 529     | 27.0  | 55975-98-9  | mainlib |
|      |        | 2   | 2,6-Dihydroxyacetophenone, 2TMS derivative                                                     | 431   | 492     | 6.6   |             | mainlib |
|      |        | 3   | Propanoic acid, 2-(3-acetoxy-4,4,14-trimethylandro-8-en-17-yl)-                                | 430   | 447     | 6.3   |             | mainlib |
|      |        | 4   | 2,5-Dihydroxyacetophenone, 2TMS derivative                                                     | 421   | 474     | 4.6   |             | mainlib |
|      |        | 5   | 2,4-Dihydroxyacetophenone, 2TMS derivative                                                     | 415   | 467     | 3.6   |             | mainlib |
|      |        | 6   | Haloxazolam                                                                                    | 414   | 460     | 3.5   | 59128-97-1  | mainlib |
|      |        | 7   | Octadecane, 1,1'-[1,3-propanediylbis(oxy)]bis-                                                 | 410   | 427     | 2.9   | 17367-38-3  | mainlib |
|      |        | 8   | Benzenesulfonamide, N-(bicyclo[2.2.1]hept-5-en-2-ylmethyl)-4-(5-oxo-3-pyrrolidinyl)-           | 409   | 542     | 2.8   |             | mainlib |
|      |        | 9   | 1,2,3-Triazole-4-carboxamide, N-(2,6-dichlorophenyl)-1-methyl-5-methylthio-                    | 407   | 478     | 2.6   |             | mainlib |
|      |        | 10  | 1,2-Cinnolinedicarboxylic acid, 1,2,3,5,6,7,8,8a-octahydro-4-trimethylsilyloxy-, diethyl ester | 402   | 452     | 2.1   | 215712-69-9 | mainlib |

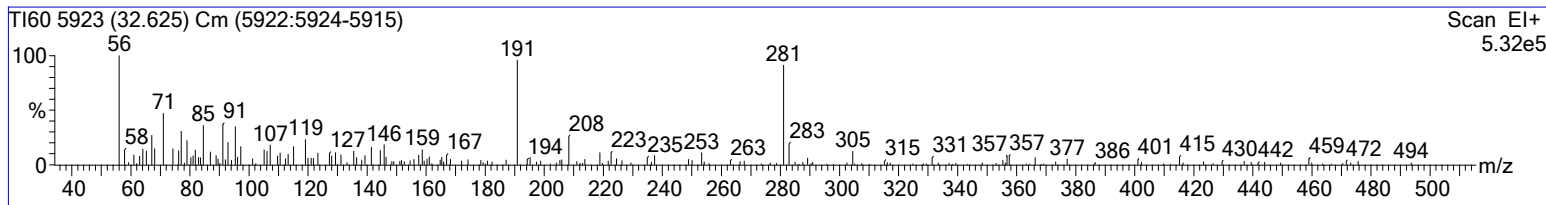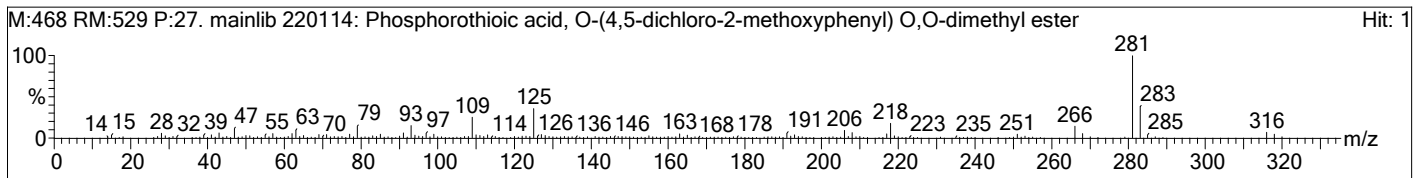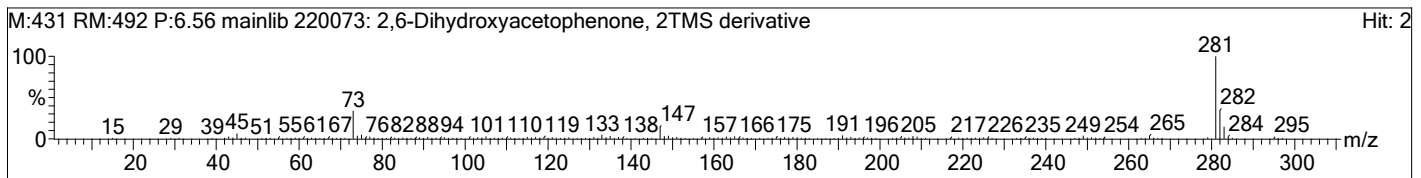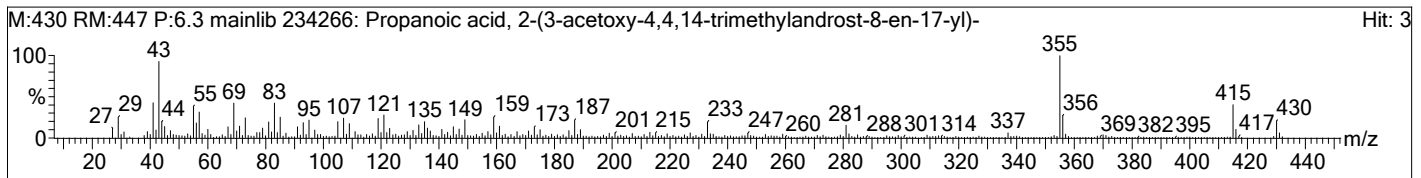



# TAMILNADU AGRICULTURAL UNIVERSITY - AGRICULTURAL MICROBIOLOGY

INSTRUMENT: PERKIN ELMER CLARUS SQ8C  
 INJECTION VOL: 1 MICRO LITER  
 SAMPLE ID : T160

COLOUMN: DB-5 MS CAPILARY STANDARD NON - POLARCOLOUMN  
 DIMENSION: 30Mts, ID: 0.25 mm, FILM: 0.25 IM CARRIER GAS: He

| #  | RT     | Scan | Height    | Area      | Area % | Norm % |
|----|--------|------|-----------|-----------|--------|--------|
| 25 | 32.735 | 5945 | 9,274,968 | 376,123.0 | 0.603  | 8.74   |

| Pk # | RT     | Hit | Compound Name                                                                                                        | Match | R.Match | Prob. | CAS       | Library   |
|------|--------|-----|----------------------------------------------------------------------------------------------------------------------|-------|---------|-------|-----------|-----------|
| 25   | 32.735 | 1   | 1,8-Dioxa-5-thiaoctane, 8-(9-borabicyclo[3.3.1]non-9-yl)-3-(9-borabicyclo[3.3.1]non-9-yloxy)-1-phenyl-               | 400   | 462     | 8.1   |           | mainlib   |
|      |        | 2   | Propanoic acid, 2-(3-acetoxy-4,4,14-trimethylandro-8-en-17-yl)-                                                      | 399   | 412     | 7.8   |           | mainlib   |
|      |        | 3   | Ethyl 5-(((3-cyano-4-(methoxymethyl)-6-methylpyridin-2-yl)sulfanyl)methyl)-1,2-oxazole-3-carboxylate                 | 384   | 461     | 4.7   |           | mainlib   |
|      |        | 4   | 3-Buten-2-one, 4-(2,6,6-trimethyl-2-cyclohexen-1-yl)-, (2,4-dinitrophenyl)hydrazone                                  | 377   | 420     | 3.6   | 6998-49-8 | mainlib   |
|      |        | 5   | Glafenin                                                                                                             | 376   | 704     | 3.5   | 3820-67-5 | nist_msms |
|      |        | 6   | Hexasiloxane, 1,1,3,3,5,5,7,7,9,9,11,11-dodecamethyl-                                                                | 373   | 484     | 3.1   | 995-82-4  | mainlib   |
|      |        | 7   | trans-4-(2-(5-Nitro-2-furyl)vinyl)-2-quinolinamine                                                                   | 365   | 499     | 2.3   | 847-10-9  | mainlib   |
|      |        | 8   | Phenol, 2,6-dichloro-4-nitro-                                                                                        | 364   | 540     | 2.2   | 618-80-4  | mainlib   |
|      |        | 9   | 4á-Methylandro-2,3-diol-1,17-dione                                                                                   | 362   | 414     | 2.0   |           | mainlib   |
|      |        | 10  | 1,5,8-Trimethoxy-12a-methyl-1,2,3,3a,3b,4,5,6,7,8,9,10,10b,11,12,12a-hexadecahydro-benzo[3,4]cyclohepta[1,2-E]indene | 361   | 398     | 1.9   |           | mainlib   |

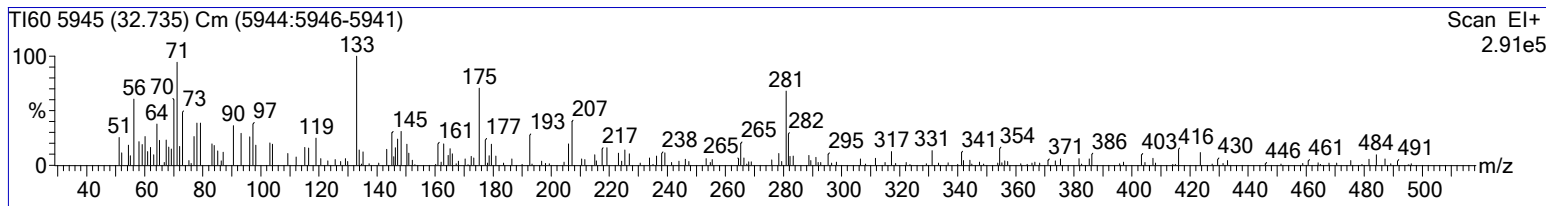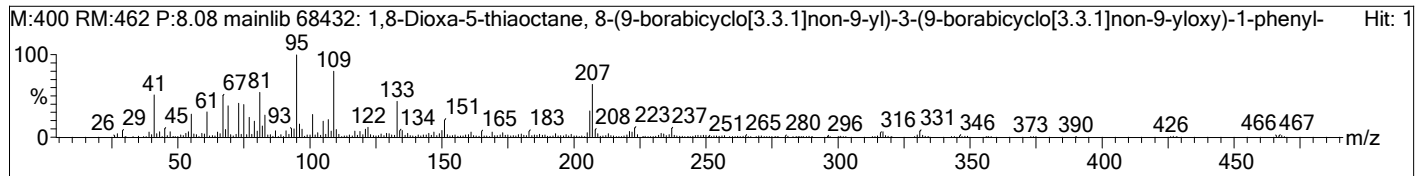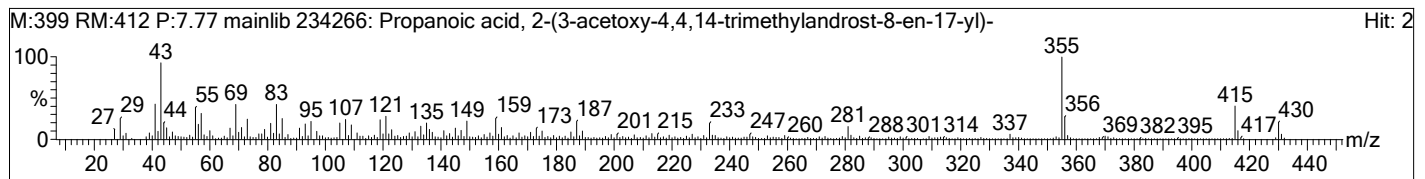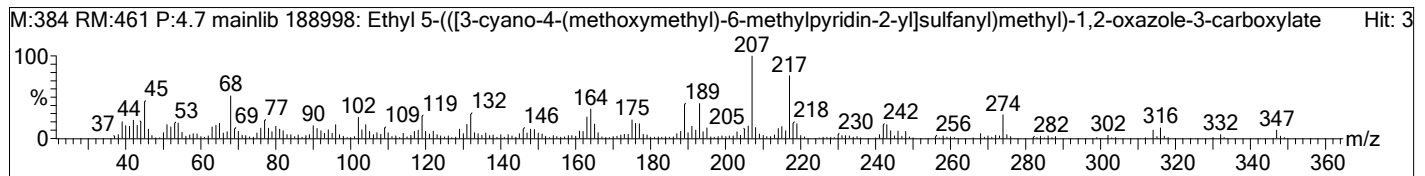

# TAMILNADU AGRICULTURAL UNIVERSITY - AGRICULTURAL MICROBIOLOGY

INSTRUMENT: PERKIN ELMER CLARUS SQ8C  
 INJECTION VOL: 1 MICRO LITER  
 SAMPLE ID : T160

COLOUMN: DB-5 MS CAPILARY STANDARD NON - POLARCOLOUMN  
 DIMENSION: 30Mts, ID: 0.25 mm, FILM: 0.25 IM CARRIER GAS: He

| #  | RT     | Scan | Height     | Area      | Area % | Norm % |
|----|--------|------|------------|-----------|--------|--------|
| 26 | 32.835 | 5965 | 10,323,956 | 585,406.2 | 0.939  | 13.60  |

| PK # | RT     | Hit | Compound Name                                                                                                                   | Match | R.Match | Prob. | CAS         | Library    |
|------|--------|-----|---------------------------------------------------------------------------------------------------------------------------------|-------|---------|-------|-------------|------------|
| 26   | 32.835 | 1   | 5,5,6-Exo-8,9,10-hexachlorocamphene                                                                                             | 363   | 419     | 9.7   | 165820-10-0 | mainlib    |
|      |        | 2   | Propanedioic acid, mononitrile, 2-[tetrahydro-4-(4-fluorophenyl)-2,2-dimethyl-4-pyranyl]-, ethyl ester                          | 362   | 448     | 9.4   | 120729-52-4 | mainlib    |
|      |        | 3   | 17á-Acetoxy-1',1'-dicarboethoxy-1á,2á-dihydro-17à-methyl-3'H-cycloprop[1,2]-5à-androst-1-en-3-one                               | 360   | 364     | 8.6   | 80097-22-9  | mainlib    |
|      |        | 4   | 4,4,6a,6b,8a,11,12,14b-Octamethyl-docosahydricene-3,13-diol                                                                     | 358   | 402     | 8.0   |             | mainlib    |
|      |        | 5   | 1-(2-Acetoxyethyl)-3,6-diazahomoadamantan-9-one oxime                                                                           | 338   | 422     | 3.6   |             | mainlib    |
|      |        | 6   | 8,13-Epoxy-labadan-1,6,7,9-tetraol-11-one, 7-O-acetate(ester)                                                                   | 330   | 412     | 2.7   | 66428-88-4  | mainlib    |
|      |        | 7   | d-Homo-24-nor-17-oxachola-20,22-diene-3,16-dione, 7-(acetyloxy)-14,15:21,23-diepoxy-4,4,8-trimethyl-, (5à,7à,13à,14á,15á,17aà)- | 329   | 339     | 2.6   | 2629-11-0   | mainlib    |
|      |        | 8   | Silane, diphenyldodecyloxy(pent-4-en-1-yloxy)-                                                                                  | 327   | 364     | 2.4   |             | mainlib    |
|      |        | 9   | à-Conotoxin MI                                                                                                                  | 325   | 388     | 2.2   |             | nist_msms2 |
|      |        | 10  | 6-Fluoro-2-trifluoromethylbenzoic acid, nonadecyl ester                                                                         | 316   | 447     | 1.6   |             | mainlib    |

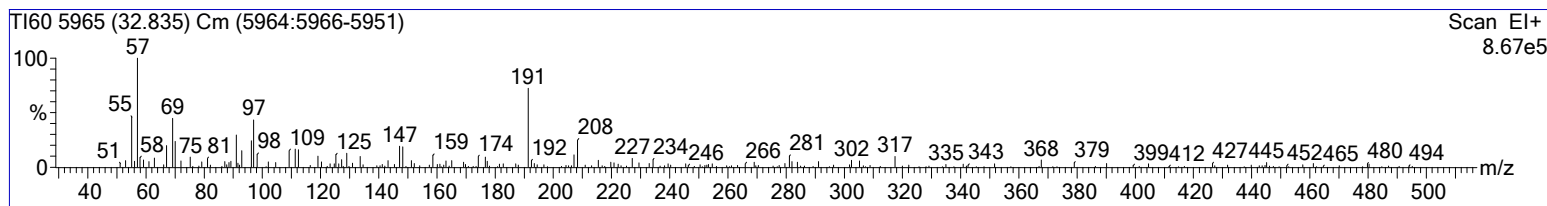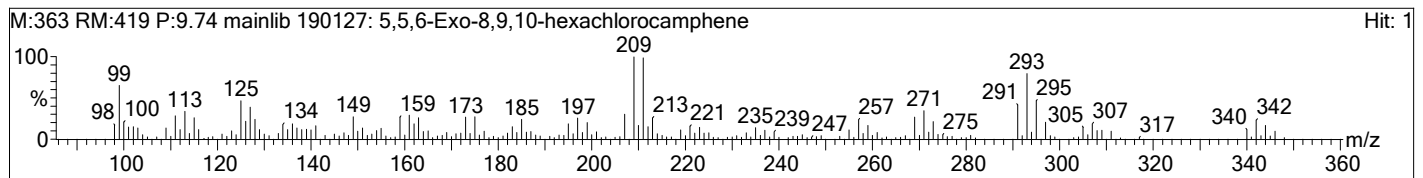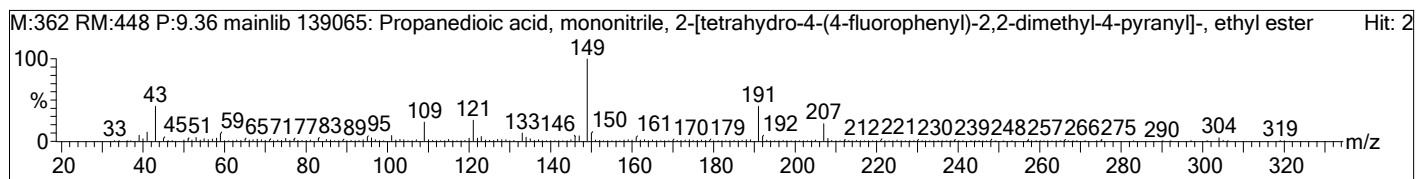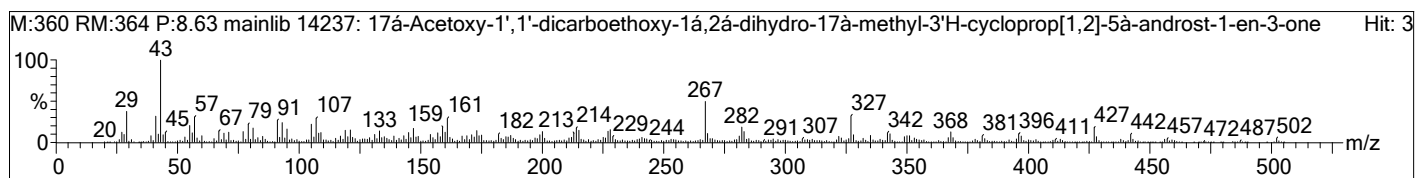

# TAMILNADU AGRICULTURAL UNIVERSITY - AGRICULTURAL MICROBIOLOGY

INSTRUMENT: PERKIN ELMER CLARUS SQ8C  
 INJECTION VOL: 1 MICRO LITER  
 SAMPLE ID : T160

COLOUMN: DB-5 MS CAPILARY STANDARD NON - POLARCOLOUMN  
 DIMENSION: 30Mts, ID: 0.25 mm, FILM: 0.25 IM CARRIER GAS: He

| #  | RT     | Scan | Height    | Area      | Area % | Norm % |
|----|--------|------|-----------|-----------|--------|--------|
| 27 | 32.945 | 5987 | 9,896,200 | 451,159.4 | 0.724  | 10.48  |

| Pk # | RT     | Hit | Compound Name                                                                                                     | Match | R.Match | Prob. | CAS         | Library |
|------|--------|-----|-------------------------------------------------------------------------------------------------------------------|-------|---------|-------|-------------|---------|
| 27   | 32.945 | 1   | Rhodopin                                                                                                          | 393   | 398     | 7.9   | 105-92-0    | mainlib |
|      |        | 2   | 8-Amino-5-[3-chlorophenylthio]-6-methoxyquinoline                                                                 | 389   | 459     | 6.7   | 64895-56-3  | mainlib |
|      |        | 3   | 17a-Methyl-3á-methoxy-17a-aza-D-homoandrost-5-ene-17-one                                                          | 388   | 456     | 6.4   | 149942-10-9 | mainlib |
|      |        | 4   | 1,1-Cyclobutanedicarboxamide, 2-phenyl-N,N'-bis(1-phenylethyl)-                                                   | 382   | 409     | 5.0   |             | mainlib |
|      |        | 5   | Cholesta-8,24-dien-3-ol, 4-methyl-, (3á,4á)-                                                                      | 378   | 406     | 4.2   | 7199-92-0   | mainlib |
|      |        | 6   | 3-Isopropyl-6a,7,10b-trimethyl-8-(2-oxo-2-phenylethyl)dodecahydrobenzo[f]chromene-7-carboxylic acid, methyl ester | 378   | 399     | 4.2   |             | mainlib |
|      |        | 7   | 3-[3-(3,4-Dimethoxy-phenyl)-acryloyl]-6-methyl-pyran-2,4-dione                                                    | 376   | 532     | 3.9   | 59144-91-1  | mainlib |
|      |        | 8   | Spirost-8-en-11-one, 3-hydroxy-, (3á,5á,14á,20á,22á,25R)-                                                         | 367   | 418     | 2.8   | 58072-54-1  | mainlib |
|      |        | 9   | Neronine, 4á,5-dihydro-                                                                                           | 364   | 423     | 2.5   | 19483-30-8  | mainlib |
|      |        | 10  | Bicyclo[5.3.0]decan-2-one, 9-(diphenylmethylene)-                                                                 | 362   | 416     | 2.3   | 345938-61-6 | mainlib |

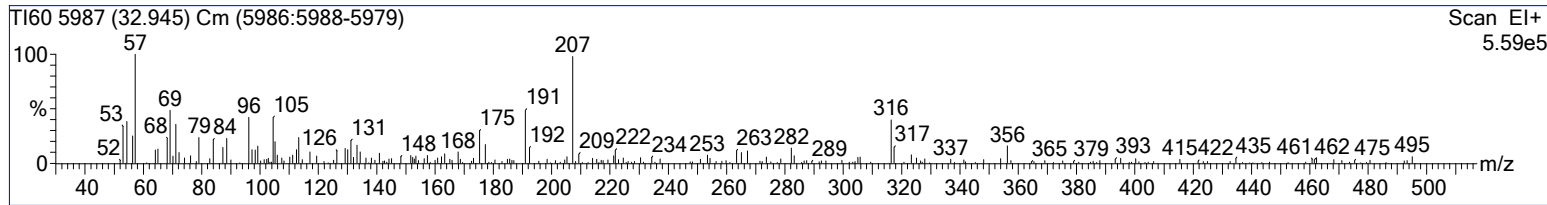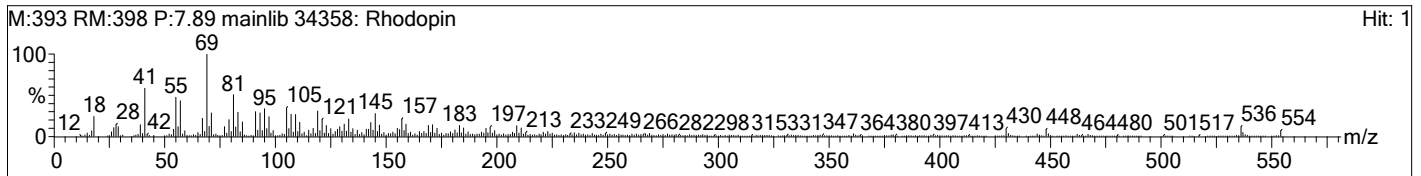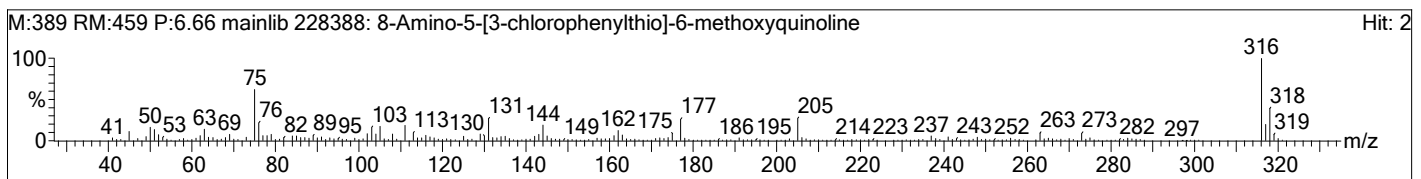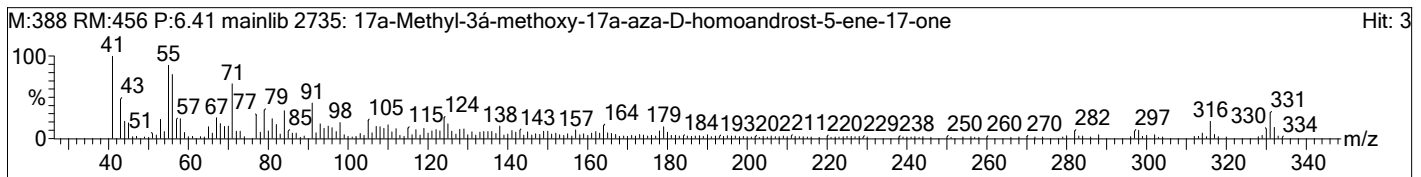

# TAMILNADU AGRICULTURAL UNIVERSITY - AGRICULTURAL MICROBIOLOGY

INSTRUMENT: PERKIN ELMER CLARUS SQ8C  
 INJECTION VOL: 1 MICRO LITER  
 SAMPLE ID : T160

COLOUMN: DB-5 MS CAPILARY STANDARD NON - POLARCOLOUMN  
 DIMENSION: 30Mts, ID: 0.25 mm, FILM: 0.25 IM CARRIER GAS: He

| #  | RT     | Scan | Height     | Area      | Area % | Norm % |
|----|--------|------|------------|-----------|--------|--------|
| 28 | 33.035 | 6005 | 10,013,573 | 770,499.3 | 1.236  | 17.90  |

| Pk # | RT     | Hit | Compound Name                                                                                                                                                                                              | Match | R.Match | Prob. | CAS        | Library |
|------|--------|-----|------------------------------------------------------------------------------------------------------------------------------------------------------------------------------------------------------------|-------|---------|-------|------------|---------|
| 28   | 33.035 | 1   | 10-Acetoxy-2-hydroxy-1,2,6a,6b,9,9,12a-heptamethyl-1,3,4,5,6,6a,6b,7,8,8a,9,10,11,12,12a,12b,13,14b-octadecahydro-2H-picene-4a-carboxylic acid, methyl ester                                               | 411   | 430     | 9.4   | 14356-56-0 | mainlib |
|      |        | 2   | Octadecane, 3-ethyl-5-(2-ethylbutyl)-                                                                                                                                                                      | 394   | 421     | 5.1   | 55282-12-7 | mainlib |
|      |        | 3   | 2-Nonadecanone 2,4-dinitrophenylhydrazine                                                                                                                                                                  | 391   | 439     | 4.5   | 28813-61-8 | mainlib |
|      |        | 4   | Heptadecane, 9-hexyl-                                                                                                                                                                                      | 391   | 427     | 4.5   | 55124-79-3 | mainlib |
|      |        | 5   | Pregn-5-en-20-one, 11-(acetyloxy)-3,14-dihydroxy-12-(2-hydroxy-3-methyl-1-oxobutoxy)-, (3a,11a,12a,14a)-                                                                                                   | 382   | 417     | 3.3   | 20230-37-9 | mainlib |
|      |        | 6   | Hexadecanoic acid, 1-(1-methylethyl)-1,2-ethanediyl ester                                                                                                                                                  | 381   | 419     | 3.2   | 56599-93-0 | mainlib |
|      |        | 7   | Docosanoic acid, 1,2,3-propanetriyl ester                                                                                                                                                                  | 380   | 400     | 3.0   | 18641-57-1 | mainlib |
|      |        | 8   | Dodecanoic acid, 1a,2,5,5a,6,9,10,10a-octahydro-5a-hydroxy-4-(hydroxymethyl)-1,1,7,9-tetramethyl-6,11-dioxo-1H-2,8a-methanocyclopenta[a]cyclopropa[e]cyclodecen-5-yl ester, [1aR-(1a,2a,5a,5a,8a,9a,10a)]- | 380   | 380     | 3.0   | 77508-68-0 | mainlib |
|      |        | 9   | 1,2-Nonadecanediol                                                                                                                                                                                         | 377   | 469     | 2.7   | 39516-65-9 | mainlib |
|      |        | 10  | Oleic acid, 3-(octadecyloxy)propyl ester                                                                                                                                                                   | 374   | 417     | 2.4   | 17367-41-8 | mainlib |

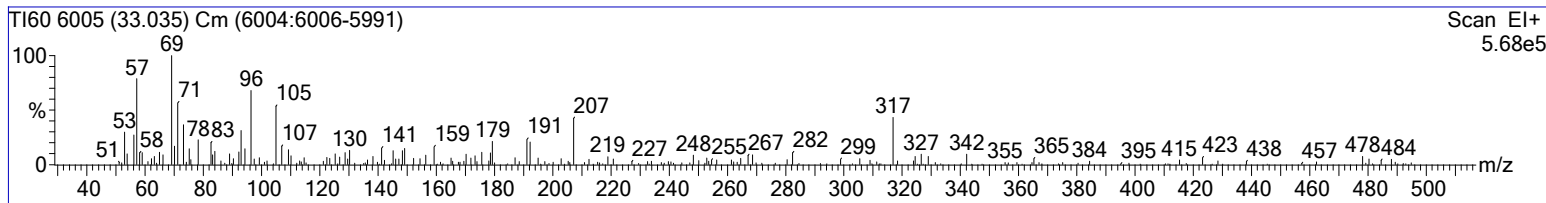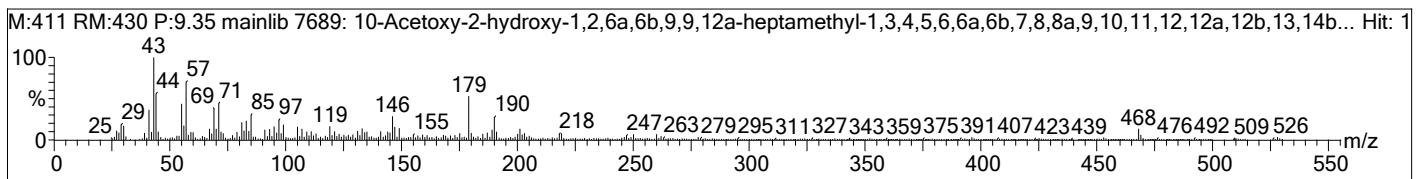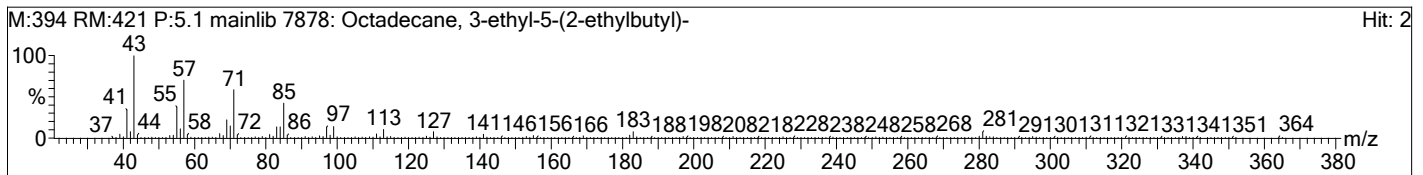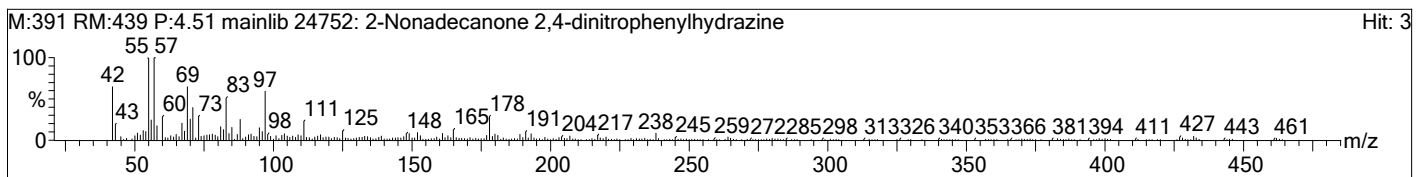

# TAMILNADU AGRICULTURAL UNIVERSITY - AGRICULTURAL MICROBIOLOGY

INSTRUMENT: PERKIN ELMER CLARUS SQ8C  
 INJECTION VOL: 1 MICRO LITER  
 SAMPLE ID : T160

COLOUMN: DB-5 MS CAPILARY STANDARD NON - POLARCOLOUMN  
 DIMENSION: 30Mts, ID: 0.25 mm, FILM: 0.25 IM CARRIER GAS: He

| #  | RT     | Scan | Height    | Area      | Area % | Norm % |
|----|--------|------|-----------|-----------|--------|--------|
| 29 | 33.180 | 6034 | 8,248,066 | 296,008.5 | 0.475  | 6.88   |

| PK # | RT     | Hit | Compound Name                                                                                                              | Match | R.Match | Prob. | CAS        | Library |
|------|--------|-----|----------------------------------------------------------------------------------------------------------------------------|-------|---------|-------|------------|---------|
| 29   | 33.180 | 1   | 7,8-Epoxy lanostan-11-ol, 3-acetoxy-                                                                                       | 429   | 431     | 7.7   |            | mainlib |
|      |        | 2   | 1,8-Dioxo-5-thiaoctane, 8-(9-borabicyclo[3.3.1]non-9-yl)-3-(9-borabicyclo[3.3.1]non-9-yloxy)-1-phenyl-                     | 417   | 479     | 5.1   |            | mainlib |
|      |        | 3   | Ursodeoxycholic acid                                                                                                       | 414   | 439     | 4.5   | 128-13-2   | mainlib |
|      |        | 4   | 9,12-Octadecadienoic acid, (2-phenyl-1,3-dioxolan-4-yl)methyl ester, trans-                                                | 413   | 426     | 4.3   | 56599-48-5 | mainlib |
|      |        | 5   | Betulin                                                                                                                    | 411   | 429     | 4.0   | 473-98-3   | replib  |
|      |        | 6   | 17.alpha.,21.alpha.-28,30-Bisnorhopane                                                                                     | 410   | 497     | 3.8   |            | mainlib |
|      |        | 7   | Rhodopin                                                                                                                   | 410   | 416     | 3.8   | 105-92-0   | mainlib |
|      |        | 8   | 9,12-Octadecadienoic acid, (2-phenyl-1,3-dioxolan-4-yl)methyl ester, cis-                                                  | 409   | 421     | 3.7   | 56599-47-4 | mainlib |
|      |        | 9   | 29-Nor-8.alpha.,9.alpha.,13.alpha.,14.alpha.-dammaran-21-oic acid, 3.alpha.,11.alpha.,16.alpha.-trihydroxy-, gamma-lactone | 406   | 450     | 3.3   | 4701-59-1  | mainlib |
|      |        | 10  | Pregnan-18-oic acid, 20-hydroxy-, (5.alpha.)-                                                                              | 404   | 484     | 3.0   | 56143-33-0 | mainlib |

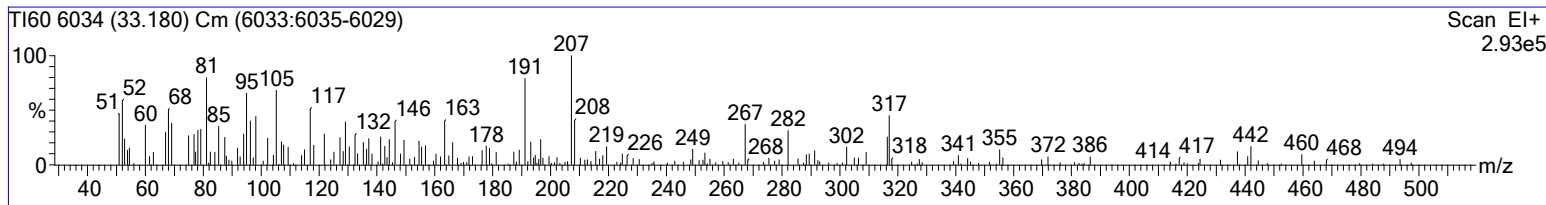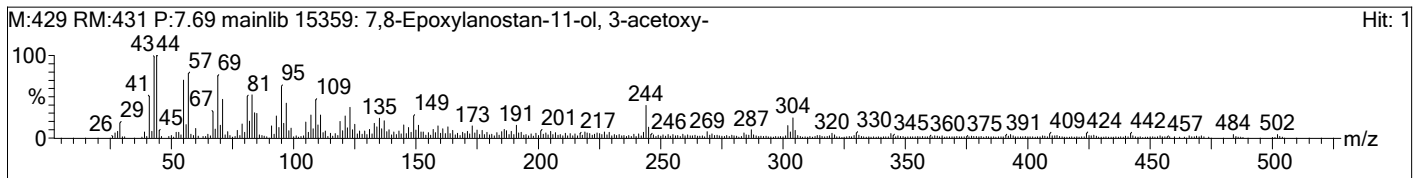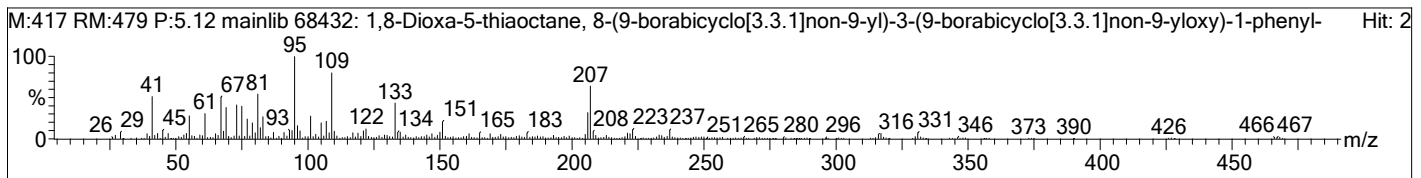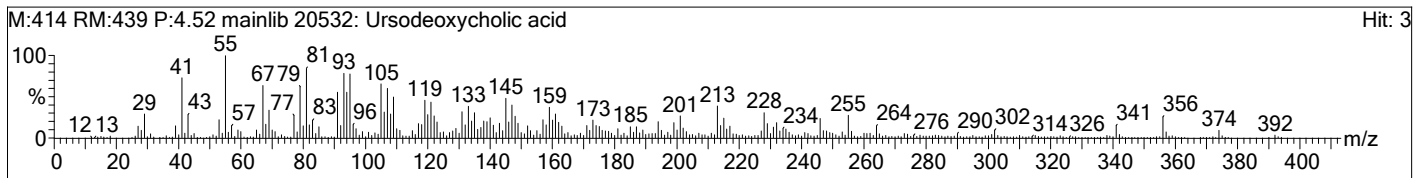

# TAMILNADU AGRICULTURAL UNIVERSITY - AGRICULTURAL MICROBIOLOGY

INSTRUMENT: PERKIN ELMER CLARUS SQ8C  
 INJECTION VOL: 1 MICRO LITER  
 SAMPLE ID : T160

COLOUMN: DB-5 MS CAPILARY STANDARD NON - POLARCOLOUMN  
 DIMENSION: 30Mts, ID: 0.25 mm, FILM: 0.25 IM CARRIER GAS: He

| #  | RT     | Scan | Height    | Area      | Area % | Norm % |
|----|--------|------|-----------|-----------|--------|--------|
| 30 | 33.310 | 6060 | 7,496,352 | 302,432.3 | 0.485  | 7.03   |

| Pk # | RT     | Hit | Compound Name                                                                             | Match | R.Match | Prob. | CAS         | Library |
|------|--------|-----|-------------------------------------------------------------------------------------------|-------|---------|-------|-------------|---------|
| 30   | 33.310 | 1   | I-Methionine, N-(5-chlorovaleryl)-, methyl ester                                          | 376   | 517     | 8.7   |             | mainlib |
|      |        | 2   | 1,2-Benzisothiazol-3-amine, TMS derivative                                                | 358   | 491     | 4.5   |             | mainlib |
|      |        | 3   | 1,2-Benzisothiazol-3-amine, TBDMS derivative                                              | 353   | 498     | 3.6   |             | mainlib |
|      |        | 4   | Betulin                                                                                   | 350   | 364     | 3.2   | 473-98-3    | replib  |
|      |        | 5   | 8H-Pyrano[3,4-b]pyrimido[5,4-d]furane, 5,6-dihydro-4-hydrazino-6,6-dimethyl-2-methylthio- | 349   | 403     | 3.1   | 253146-95-1 | mainlib |
|      |        | 6   | 5-Bromo-4-nitroimidazole-2-[2-thioacetic acid]                                            | 348   | 494     | 3.0   |             | mainlib |
|      |        | 7   | Acetic acid, 2,3-dibromo-4-methoxymethoxy-1-methyl-pent-2-enyl ester                      | 348   | 451     | 3.0   |             | mainlib |
|      |        | 8   | 2,4,6-Cycloheptatrien-1-one, 3,5-bis-trimethylsilyl-                                      | 347   | 465     | 2.8   |             | mainlib |
|      |        | 9   | Acetamide, 2-chloro-N-(3-cyano-4,6-dihydro-4,4,6,6-tetramethylthieno[2,3-c]furan-2-yl)-   | 345   | 439     | 2.6   |             | mainlib |
|      |        | 10  | Adamantane-2,6-dione, bis(ethylene ketal)-                                                | 344   | 435     | 2.5   | 60797-89-9  | mainlib |

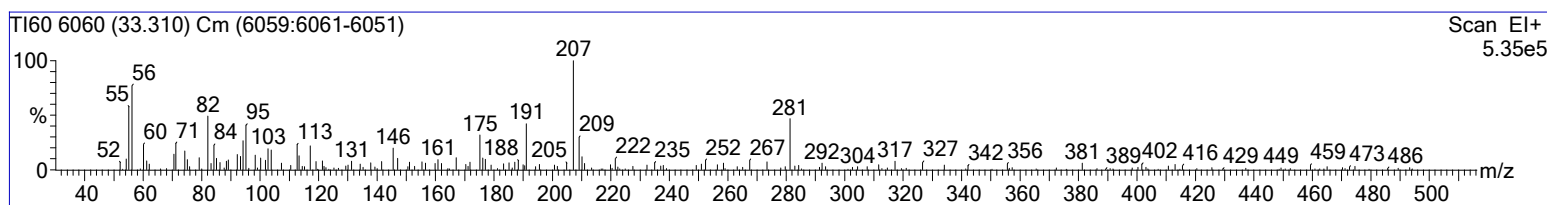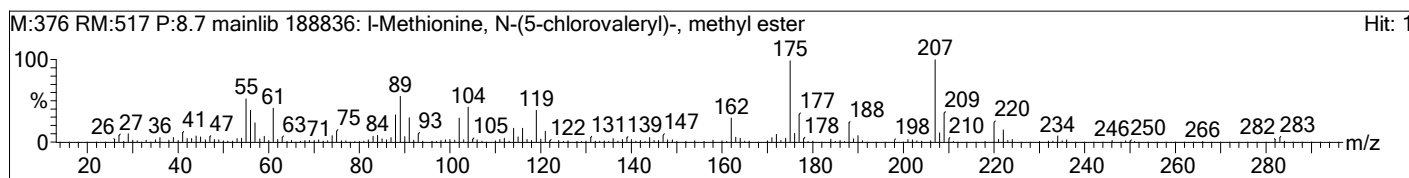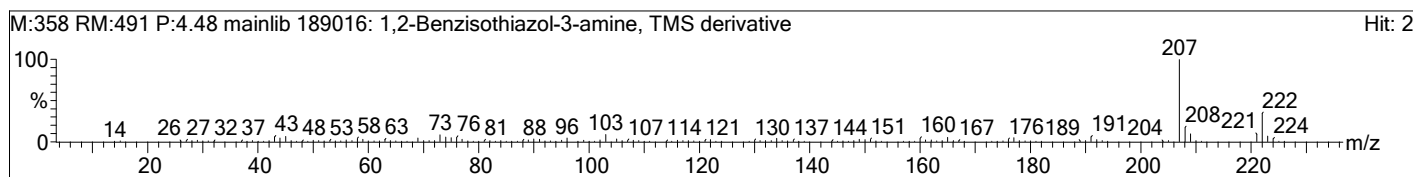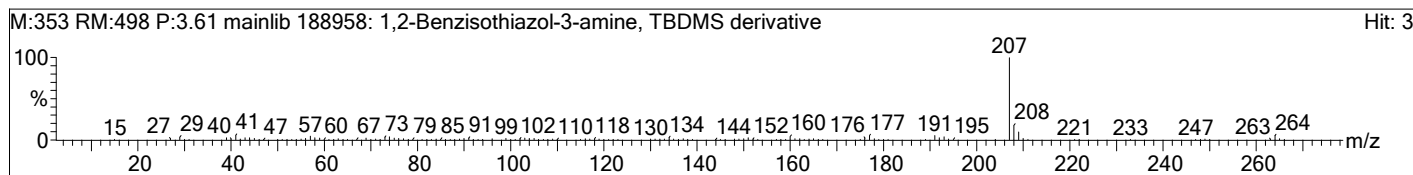

Supplement: pone.0219014.s009.pdf [file pone.0219014.s009.pdf]
