# Supplementary material for: Enhancement of disease resistance, growth potential, and photosynthesis in tomato (Solanum lycopersicum) by inoculation with an endophytic actinobacterium, Streptomyces thermocarboxydus strain BPSAC147
Source: PubMed Central journal article supplement (PMC6608948; doi:10.1371/journal.pone.0219014), 2019-07-03

# TAMILNADU AGRICULTURAL UNIVERSITY - AGRICULTURAL MICROBIOLOGY

INSTRUMENT: PERKIN ELMER CLARUS SQ8C  
 INJECTION VOL: 1 MICRO LITER  
 SAMPLE ID : T260

COLOUMN: DB-5 MS CAPILARY STANDARD NON - POLARCOLOUMN  
 DIMENSION: 30Mts, ID: 0.25 mm, FILM: 0.25 IM CARRIER GAS: He

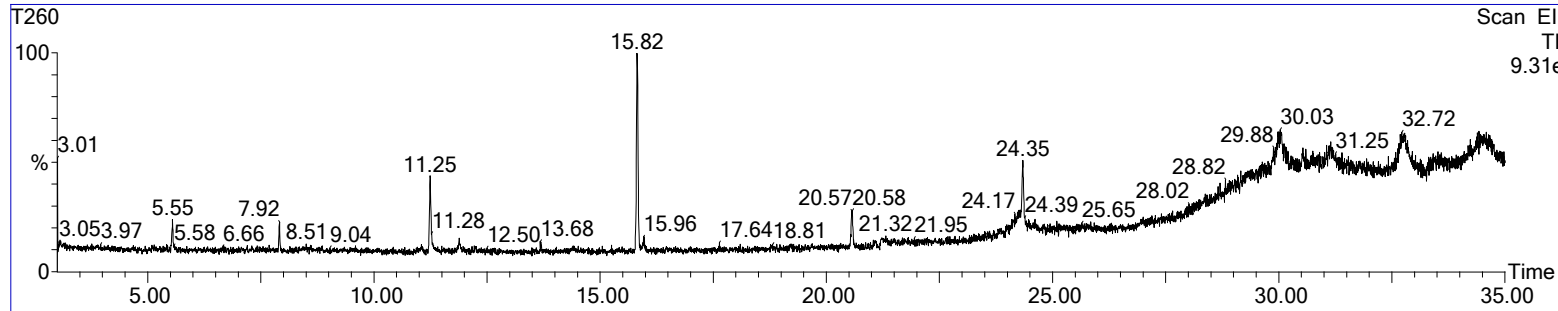

| # | RT     | Scan | Height     | Area        | Area % | Norm % |
|---|--------|------|------------|-------------|--------|--------|
| 1 | 11.247 | 1649 | 32,632,418 | 1,480,199.5 | 1.268  | 40.13  |

| Pk # | RT     | Hit | Compound Name  | Match | R.Match | Prob. | CAS        | Library |
|------|--------|-----|----------------|-------|---------|-------|------------|---------|
| 1    | 11.247 | 1   | 1-Undecanol    | 796   | 919     | 9.4   | 112-42-5   | mainlib |
|      |        | 2   | 1-Undecanol    | 778   | 904     | 9.4   | 112-42-5   | replib  |
|      |        | 3   | 1-Dodecanol    | 777   | 869     | 4.6   | 112-53-8   | replib  |
|      |        | 4   | Cyclodecane    | 769   | 882     | 3.4   | 293-96-9   | replib  |
|      |        | 5   | 1-Dodecanol    | 768   | 870     | 4.6   | 112-53-8   | replib  |
|      |        | 6   | 1-Dodecanol    | 768   | 848     | 4.6   | 112-53-8   | replib  |
|      |        | 7   | 1-Hexadecanol  | 767   | 860     | 3.1   | 36653-82-4 | mainlib |
|      |        | 8   | 1-Tetradecanol | 765   | 815     | 2.9   | 112-72-1   | replib  |
|      |        | 9   | 1-Undecanol    | 763   | 873     | 9.4   | 112-42-5   | replib  |
|      |        | 10  | 1-Dodecanol    | 762   | 859     | 4.6   | 112-53-8   | replib  |

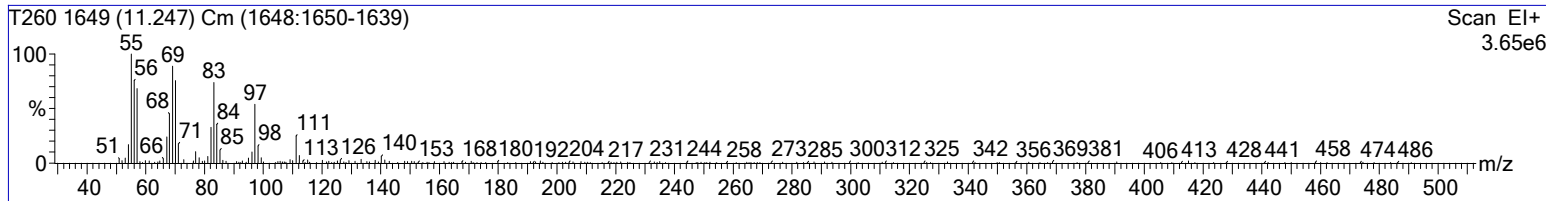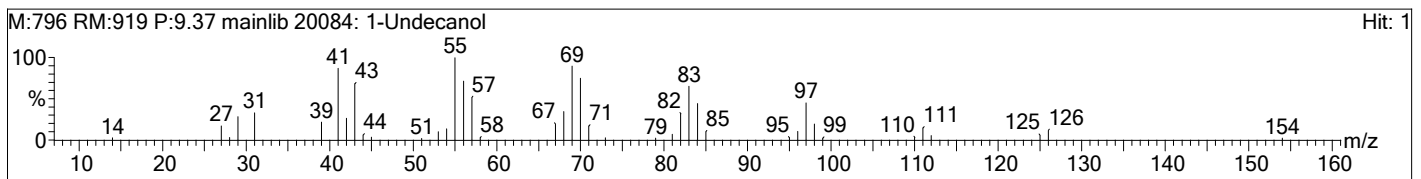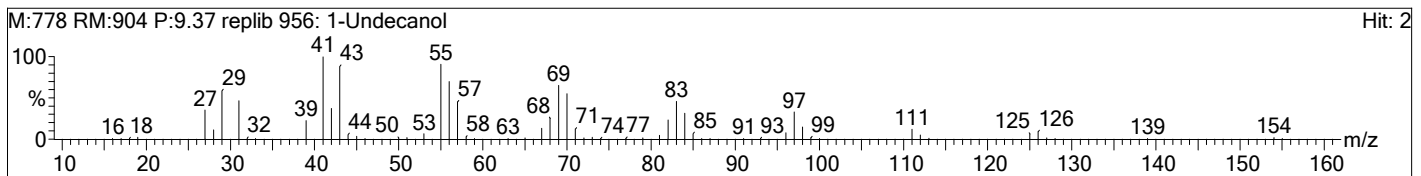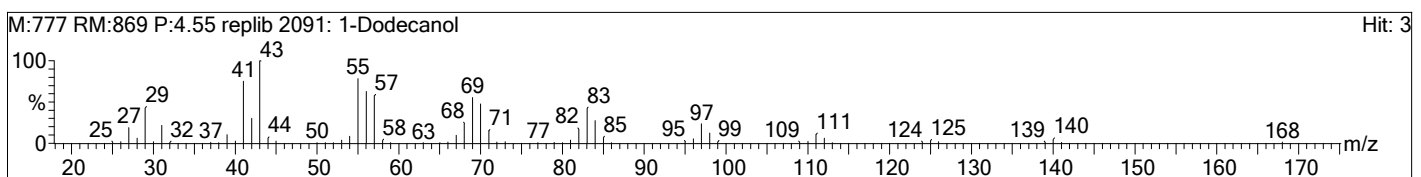

# TAMILNADU AGRICULTURAL UNIVERSITY - AGRICULTURAL MICROBIOLOGY

INSTRUMENT: PERKIN ELMER CLARUS SQ8C  
 INJECTION VOL: 1 MICRO LITER  
 SAMPLE ID : T260

COLOUMN: DB-5 MS CAPILARY STANDARD NON - POLARCOLOUMN  
 DIMENSION: 30Mts, ID: 0.25 mm, FILM: 0.25 IM CARRIER GAS: He

| # | RT     | Scan | Height     | Area        | Area % | Norm % |
|---|--------|------|------------|-------------|--------|--------|
| 2 | 15.818 | 2563 | 85,449,568 | 3,663,354.2 | 3.139  | 99.31  |

| Pk # | RT     | Hit | Compound Name                      | Match | R.Match | Prob. | CAS        | Library |
|------|--------|-----|------------------------------------|-------|---------|-------|------------|---------|
| 2    | 15.818 | 1   | Dodecyl acrylate                   | 876   | 912     | 48.0  | 2156-97-0  | replib  |
|      |        | 2   | Dodecyl acrylate                   | 875   | 901     | 48.0  | 2156-97-0  | replib  |
|      |        | 3   | Dodecyl acrylate                   | 831   | 860     | 48.0  | 2156-97-0  | mainlib |
|      |        | 4   | 2-Propenoic acid, tridecyl ester   | 827   | 861     | 9.9   | 3076-04-8  | mainlib |
|      |        | 5   | 2-Propenoic acid, pentadecyl ester | 795   | 819     | 2.6   | 43080-23-5 | mainlib |
|      |        | 6   | 1-Dodecanol                        | 784   | 841     | 1.8   | 112-53-8   | replib  |
|      |        | 7   | Ethylene diacrylate                | 778   | 820     | 1.4   | 2274-11-5  | mainlib |
|      |        | 8   | 4-Trifluoroacetoxytridecane        | 776   | 813     | 1.3   |            | mainlib |
|      |        | 9   | Dichloroacetic acid, dodecyl ester | 774   | 805     | 1.2   | 83005-01-0 | mainlib |
|      |        | 10  | 5-Eicosene, (E)-                   | 772   | 830     | 1.1   | 74685-30-6 | mainlib |

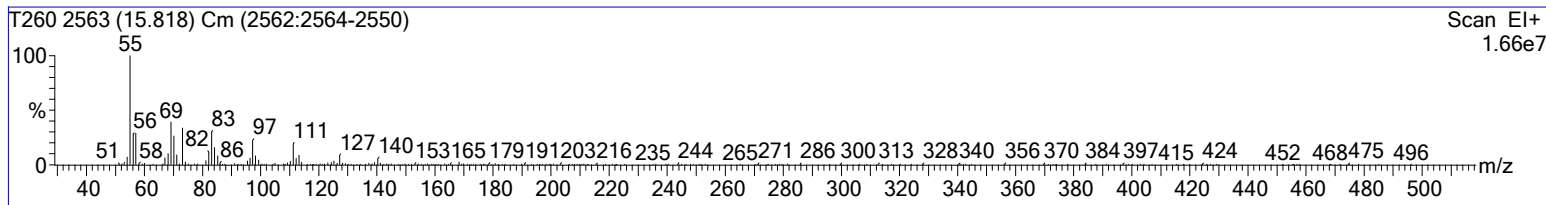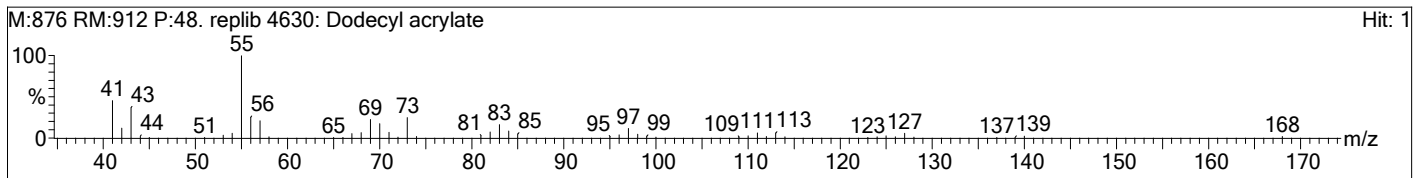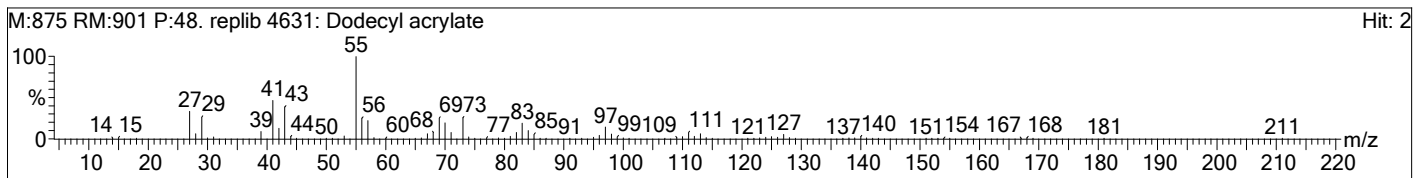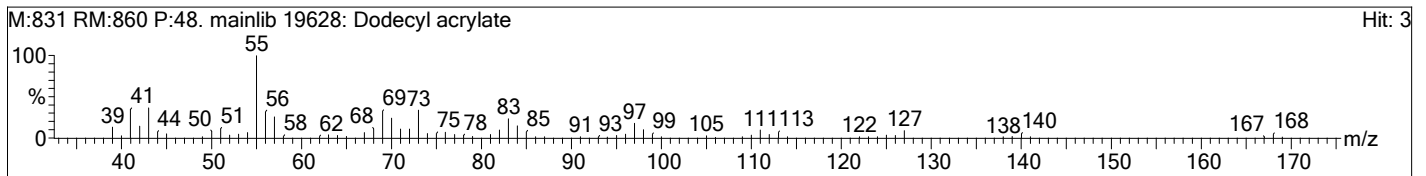

# TAMILNADU AGRICULTURAL UNIVERSITY - AGRICULTURAL MICROBIOLOGY

INSTRUMENT: PERKIN ELMER CLARUS SQ8C  
 INJECTION VOL: 1 MICRO LITER  
 SAMPLE ID : T260

COLOUMN: DB-5 MS CAPILARY STANDARD NON - POLARCOLOUMN  
 DIMENSION: 30Mts, ID: 0.25 mm, FILM: 0.25 IM CARRIER GAS: He

| # | RT     | Scan | Height     | Area      | Area % | Norm % |
|---|--------|------|------------|-----------|--------|--------|
| 3 | 20.575 | 3514 | 17,308,590 | 928,657.2 | 0.796  | 25.17  |

| Pk # | RT     | Hit | Compound Name                                | Match | R.Match | Prob. | CAS       | Library |
|------|--------|-----|----------------------------------------------|-------|---------|-------|-----------|---------|
| 3    | 20.575 | 1   | Hexadecanoic acid, methyl ester              | 616   | 728     | 15.9  | 112-39-0  | mainlib |
|      |        | 2   | Hexadecanoic acid, methyl ester              | 606   | 809     | 15.9  | 112-39-0  | replib  |
|      |        | 3   | Pentadecanoic acid, 14-methyl-, methyl ester | 599   | 765     | 8.7   | 5129-60-2 | mainlib |
|      |        | 4   | Pentadecanoic acid, 13-methyl-, methyl ester | 596   | 655     | 7.7   | 5487-50-3 | mainlib |
|      |        | 5   | Hexadecanoic acid, methyl ester              | 594   | 844     | 15.9  | 112-39-0  | replib  |
|      |        | 6   | Hexadecanoic acid, 14-methyl-, methyl ester  | 593   | 640     | 6.8   | 2490-49-5 | mainlib |
|      |        | 7   | Methyl tetradecanoate                        | 591   | 765     | 6.2   | 124-10-7  | replib  |
|      |        | 8   | Hexadecanoic acid, methyl ester              | 591   | 720     | 15.9  | 112-39-0  | replib  |
|      |        | 9   | Hexadecanoic acid, methyl ester              | 588   | 690     | 15.9  | 112-39-0  | replib  |
|      |        | 10  | Tetradecanoic acid, 12-methyl-, methyl ester | 587   | 670     | 5.3   | 5129-66-8 | mainlib |

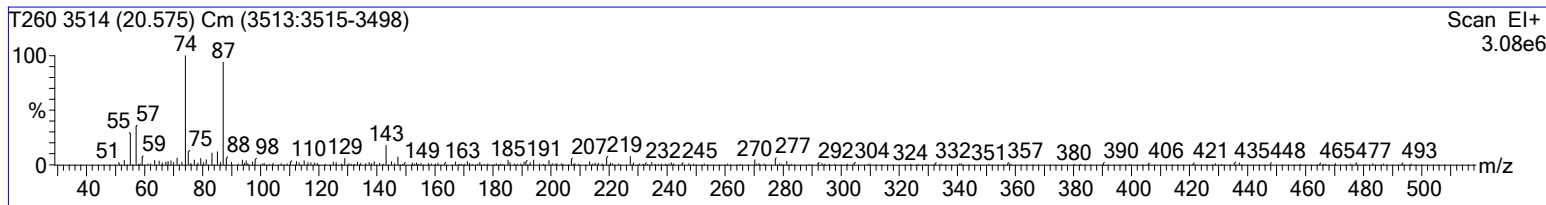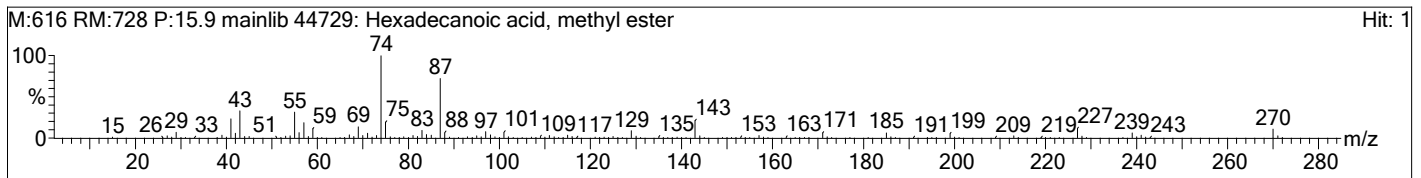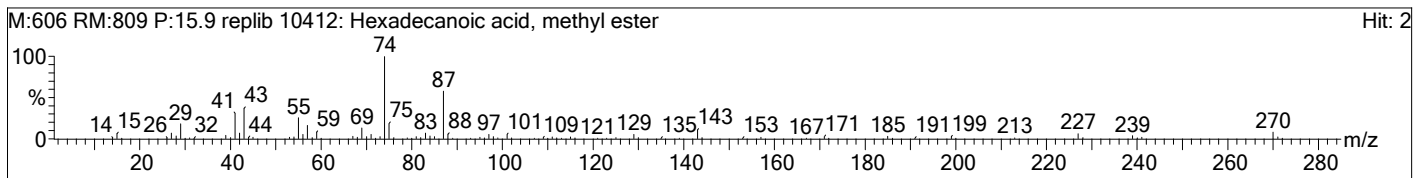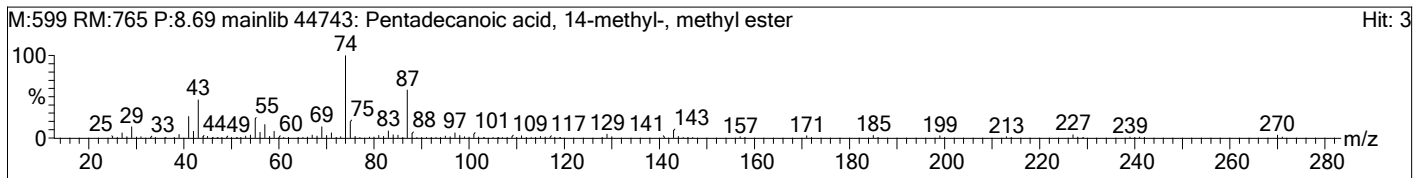

# TAMILNADU AGRICULTURAL UNIVERSITY - AGRICULTURAL MICROBIOLOGY

INSTRUMENT: PERKIN ELMER CLARUS SQ8C  
 INJECTION VOL: 1 MICRO LITER  
 SAMPLE ID : T260

COLOUMN: DB-5 MS CAPILARY STANDARD NON - POLARCOLOUMN  
 DIMENSION: 30Mts, ID: 0.25 mm, FILM: 0.25 IM CARRIER GAS: He

| # | RT     | Scan | Height     | Area      | Area % | Norm % |
|---|--------|------|------------|-----------|--------|--------|
| 4 | 24.257 | 4250 | 11,163,678 | 726,894.6 | 0.623  | 19.71  |

| Pk # | RT     | Hit | Compound Name                                                     | Match | R.Match | Prob. | CAS         | Library |
|------|--------|-----|-------------------------------------------------------------------|-------|---------|-------|-------------|---------|
| 4    | 24.257 | 1   | Ethyl iso-allocholate                                             | 464   | 486     | 9.1   |             | mainlib |
|      |        | 2   | 1-Heptatriacotanol                                                | 456   | 515     | 6.8   | 105794-58-9 | mainlib |
|      |        | 3   | 1-Hexadecanol, 2-methyl-                                          | 442   | 515     | 4.2   | 2490-48-4   | mainlib |
|      |        | 4   | Morphinan-4,5-epoxy-3,6-di-ol, 6-[7-nitrobenzofurazan-4-yl]amino- | 440   | 488     | 3.9   |             | mainlib |
|      |        | 5   | Hexadecane, 1,1-bis(dodecyloxy)-                                  | 438   | 485     | 3.6   | 56554-64-4  | mainlib |
|      |        | 6   | Cholest-22-ene-21-ol, 3,5-dehydro-6-methoxy-, pivalate            | 434   | 509     | 3.0   |             | mainlib |
|      |        | 7   | Stigmastane-3,6-dione, (5à)-                                      | 431   | 512     | 2.7   | 22149-69-5  | mainlib |
|      |        | 8   | Glycidyl oleate                                                   | 427   | 487     | 2.3   |             | mainlib |
|      |        | 9   | Rhodopin                                                          | 424   | 426     | 2.0   | 105-92-0    | mainlib |
|      |        | 10  | 7-Heptadecene, 17-chloro-                                         | 423   | 505     | 1.9   | 56554-79-1  | mainlib |

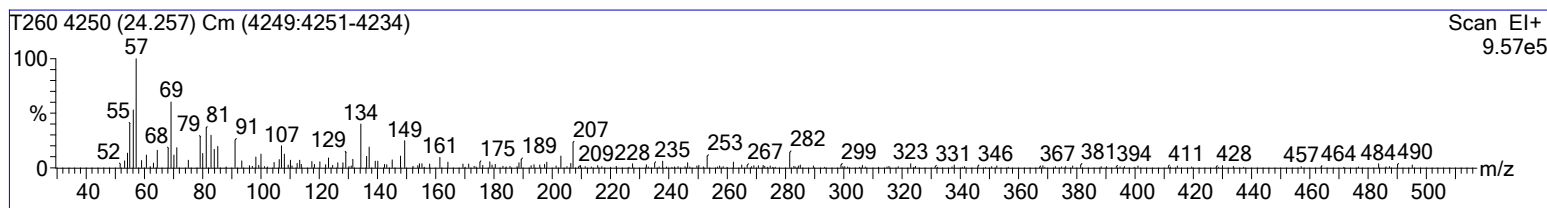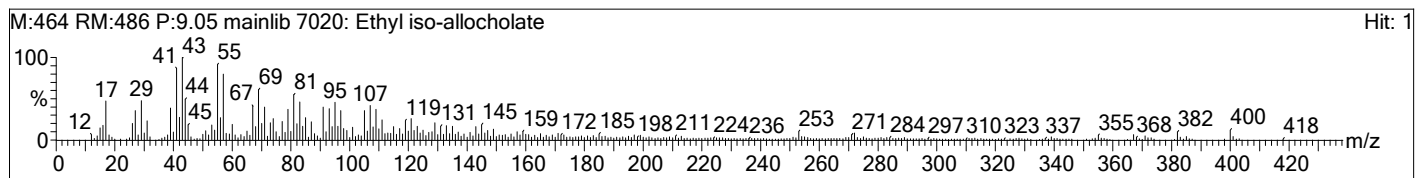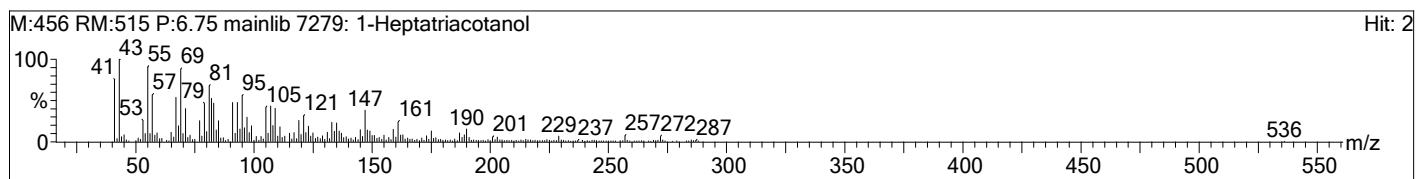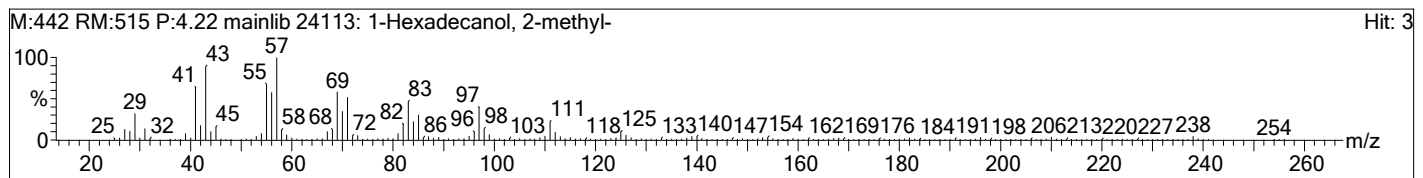

# TAMILNADU AGRICULTURAL UNIVERSITY - AGRICULTURAL MICROBIOLOGY

INSTRUMENT: PERKIN ELMER CLARUS SQ8C  
 INJECTION VOL: 1 MICRO LITER  
 SAMPLE ID : T260

COLOUMN: DB-5 MS CAPILARY STANDARD NON - POLARCOLOUMN  
 DIMENSION: 30Mts, ID: 0.25 mm, FILM: 0.25 IM CARRIER GAS: He

| # | RT     | Scan | Height     | Area        | Area % | Norm % |
|---|--------|------|------------|-------------|--------|--------|
| 5 | 24.347 | 4268 | 32,221,488 | 1,923,259.0 | 1.648  | 52.14  |

| Pk # | RT     | Hit | Compound Name                                | Match | R.Match | Prob. | CAS       | Library |
|------|--------|-----|----------------------------------------------|-------|---------|-------|-----------|---------|
| 5    | 24.347 | 1   | Methyl stearate                              | 675   | 771     | 54.6  | 112-61-8  | replib  |
|      |        | 2   | Methyl stearate                              | 664   | 774     | 54.6  | 112-61-8  | replib  |
|      |        | 3   | Methyl stearate                              | 662   | 765     | 54.6  | 112-61-8  | replib  |
|      |        | 4   | Methyl stearate                              | 659   | 820     | 54.6  | 112-61-8  | replib  |
|      |        | 5   | Methyl stearate                              | 659   | 750     | 54.6  | 112-61-8  | mainlib |
|      |        | 6   | Methyl stearate                              | 658   | 789     | 54.6  | 112-61-8  | replib  |
|      |        | 7   | Heptadecanoic acid, 16-methyl-, methyl ester | 649   | 722     | 16.4  | 5129-61-3 | mainlib |
|      |        | 8   | Heptadecanoic acid, 16-methyl-, methyl ester | 643   | 721     | 16.4  | 5129-61-3 | replib  |
|      |        | 9   | Heptadecanoic acid, 16-methyl-, methyl ester | 637   | 757     | 16.4  | 5129-61-3 | replib  |
|      |        | 10  | Methyl stearate                              | 629   | 723     | 54.6  | 112-61-8  | replib  |

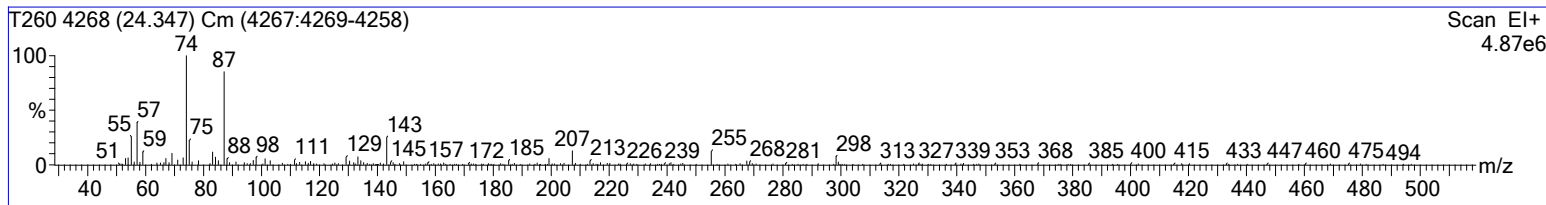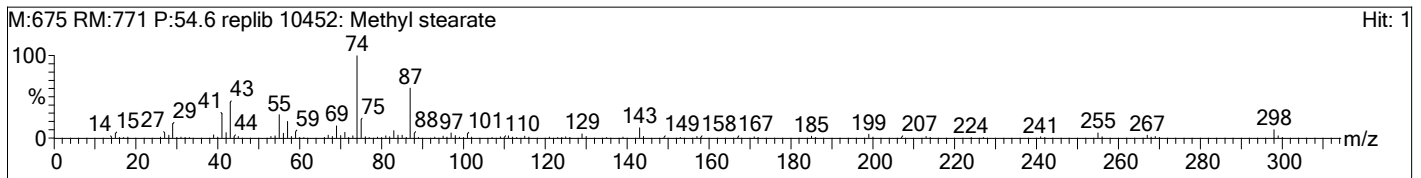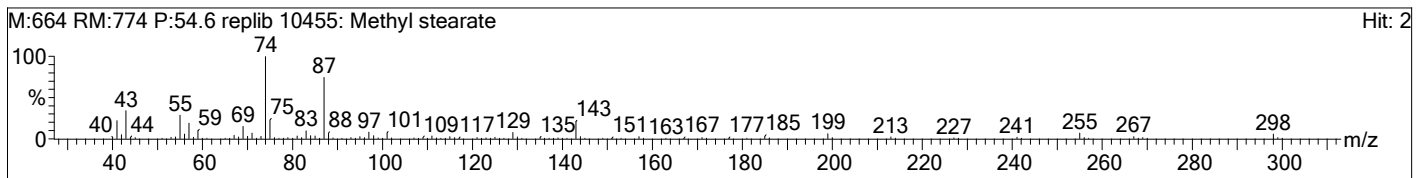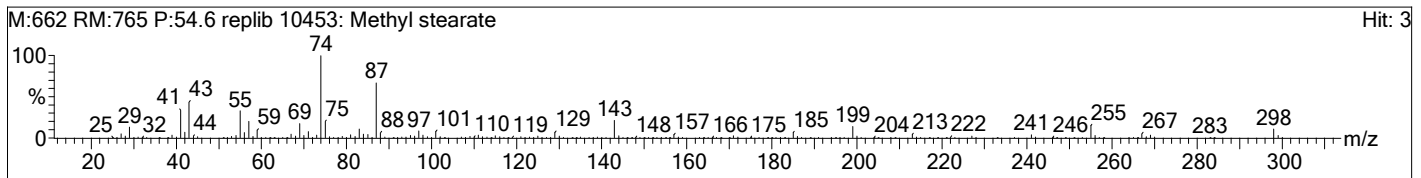

# TAMILNADU AGRICULTURAL UNIVERSITY - AGRICULTURAL MICROBIOLOGY

INSTRUMENT: PERKIN ELMER CLARUS SQ8C  
 INJECTION VOL: 1 MICRO LITER  
 SAMPLE ID : T260

COLOUMN: DB-5 MS CAPILARY STANDARD NON - POLARCOLOUMN  
 DIMENSION: 30Mts, ID: 0.25 mm, FILM: 0.25 IM CARRIER GAS: He

| # | RT     | Scan | Height     | Area      | Area % | Norm % |
|---|--------|------|------------|-----------|--------|--------|
| 6 | 29.419 | 5282 | 12,617,741 | 953,241.6 | 0.817  | 25.84  |

| Pk # | RT     | Hit | Compound Name                                                                                                                        | Match | R.Match | Prob. | CAS         | Library |
|------|--------|-----|--------------------------------------------------------------------------------------------------------------------------------------|-------|---------|-------|-------------|---------|
| 6    | 29.419 | 1   | 5Z,?8Z,?11Z,?14Z-Eicosatetraenoic acid,? 3-?theinylmethyl ester                                                                      | 403   | 497     | 17.7  | 390824-17-6 | mainlib |
|      |        | 2   | Eicosapentaenoic Acid, TBDMS derivative                                                                                              | 372   | 412     | 4.8   |             | mainlib |
|      |        | 3   | Doconexent, TBDMS derivative                                                                                                         | 369   | 413     | 4.3   |             | mainlib |
|      |        | 4   | 7,10,13,16-Docosatetraenoic acid, (Z)-, TMS derivative                                                                               | 368   | 415     | 4.1   |             | mainlib |
|      |        | 5   | Arachidonic Acid, TBDMS derivative                                                                                                   | 364   | 412     | 3.5   |             | mainlib |
|      |        | 6   | Doconexent, TMS derivative                                                                                                           | 361   | 411     | 3.1   |             | mainlib |
|      |        | 7   | 2,4a-Oxymethano-1,2,3,4,4a,4b,5,6,7,8,8a,9-dodecahydrophenanthren-9-one, 8-cyanomethyl-2-methoxy-7-methoxycarbonyl-1,1,7-trimethyl-  | 359   | 380     | 2.8   |             | mainlib |
|      |        | 8   | Eicosapentaenoic Acid, TMS derivative                                                                                                | 354   | 405     | 2.3   |             | mainlib |
|      |        | 9   | 17-(1,5-Dimethylhexyl)-2,3-dihydroxy-10,13-dimethyl-1,2,3,7,8,9,10,11,12,13,14,15,16,17-tetradecahydrocyclopenta[a]phenanthren-6-one | 353   | 369     | 2.2   |             | mainlib |
|      |        | 10  | 5-Hydroxymethyl-4-pentanoyl-1-(1-phenylethyl)imidazolidin-2-one                                                                      | 352   | 491     | 2.1   |             | mainlib |

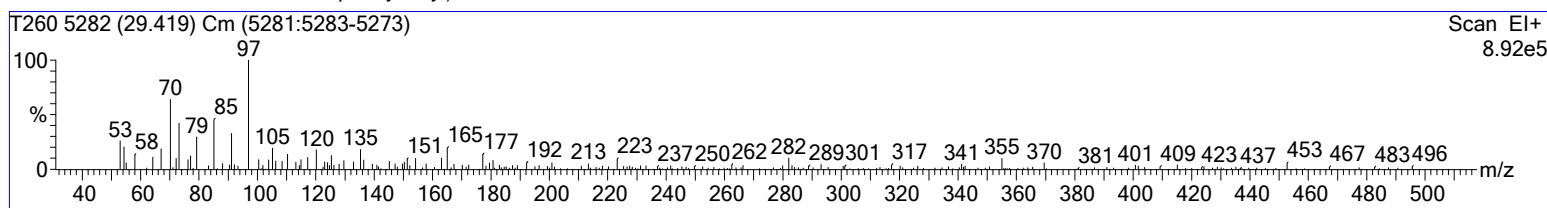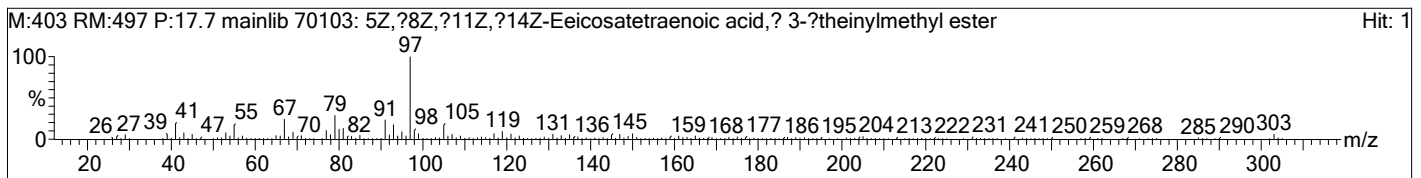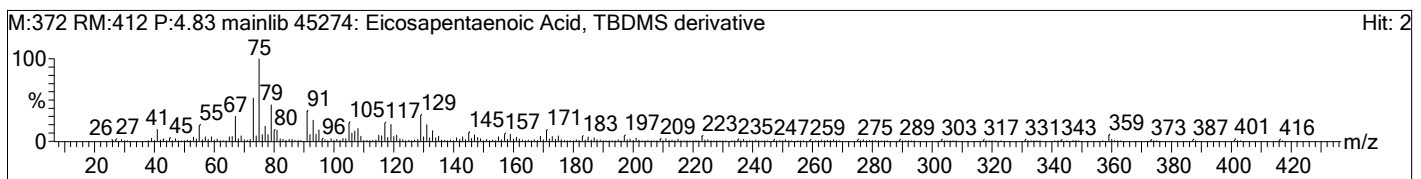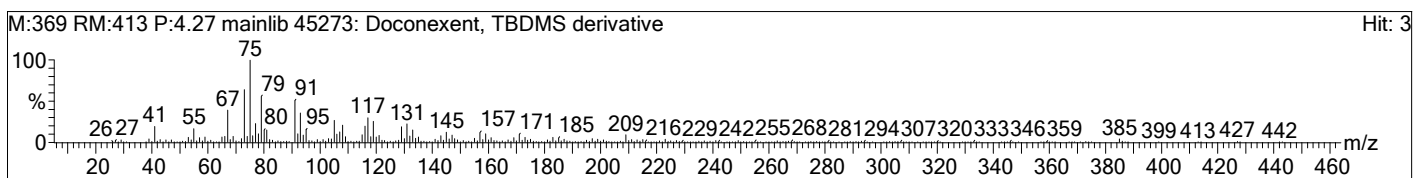

# TAMILNADU AGRICULTURAL UNIVERSITY - AGRICULTURAL MICROBIOLOGY

INSTRUMENT: PERKIN ELMER CLARUS SQ8C  
 INJECTION VOL: 1 MICRO LITER  
 SAMPLE ID : T260

COLOUMN: DB-5 MS CAPILARY STANDARD NON - POLARCOLOUMN  
 DIMENSION: 30Mts, ID: 0.25 mm, FILM: 0.25 IM CARRIER GAS: He

| # | RT     | Scan | Height     | Area      | Area % | Norm % |
|---|--------|------|------------|-----------|--------|--------|
| 7 | 29.639 | 5326 | 15,488,421 | 697,858.4 | 0.598  | 18.92  |

| Pk # | RT     | Hit | Compound Name                                                 | Match | R.Match | Prob. | CAS         | Library   |
|------|--------|-----|---------------------------------------------------------------|-------|---------|-------|-------------|-----------|
| 7    | 29.639 | 1   | Strychane, 1-acetyl-20à-hydroxy-16-methylene-                 | 496   | 551     | 28.2  | 2111-98-0   | mainlib   |
|      |        | 2   | Rhodopin                                                      | 444   | 446     | 5.6   | 105-92-0    | mainlib   |
|      |        | 3   | Glafenin                                                      | 439   | 731     | 4.5   | 3820-67-5   | nist_msms |
|      |        | 4   | 7,8-Epoxy lanostan-11-ol, 3-acetoxy-                          | 431   | 435     | 3.4   |             | mainlib   |
|      |        | 5   | 12-Hydroxyoctadecanethioic acid, S-t-butyl ester              | 428   | 482     | 3.0   | 58587-08-9  | mainlib   |
|      |        | 6   | 1-Heptatriacotanol                                            | 425   | 504     | 2.6   | 105794-58-9 | mainlib   |
|      |        | 7   | 1-Phenazinecarboxylic acid, 6-(1-methoxyethyl)-, methyl ester | 421   | 492     | 2.2   | 73634-71-6  | mainlib   |
|      |        | 8   | 2,6-Dihydroxyacetophenone, 2TMS derivative                    | 421   | 483     | 2.2   |             | mainlib   |
|      |        | 9   | 2,5-Dihydroxyacetophenone, 2TMS derivative                    | 418   | 476     | 2.0   |             | mainlib   |
|      |        | 10  | Benzofuran-6-ol-3-one, 2-(4-ethoxycarbonyl)benzylidene-       | 415   | 503     | 1.7   |             | mainlib   |

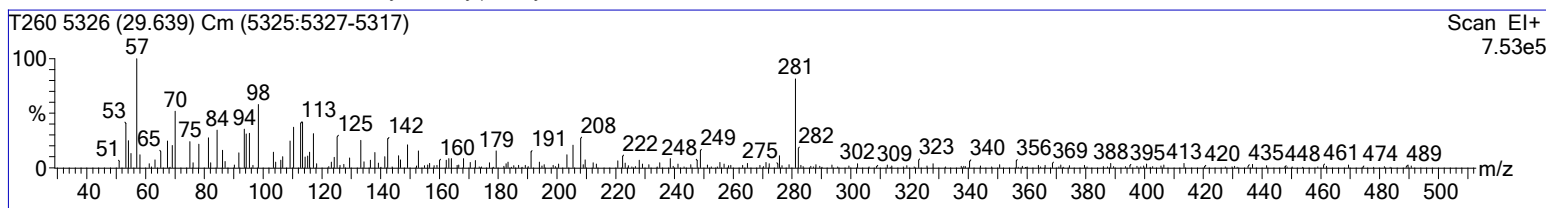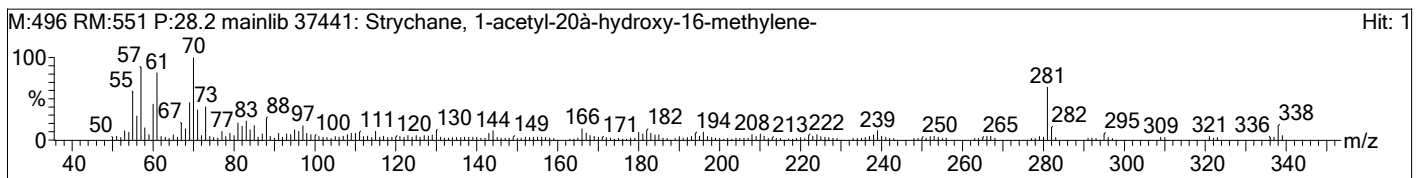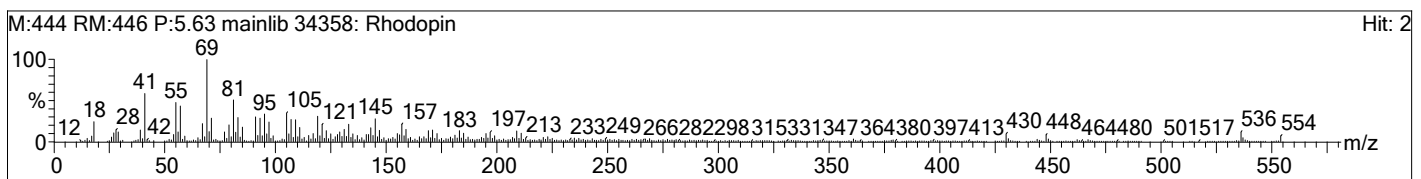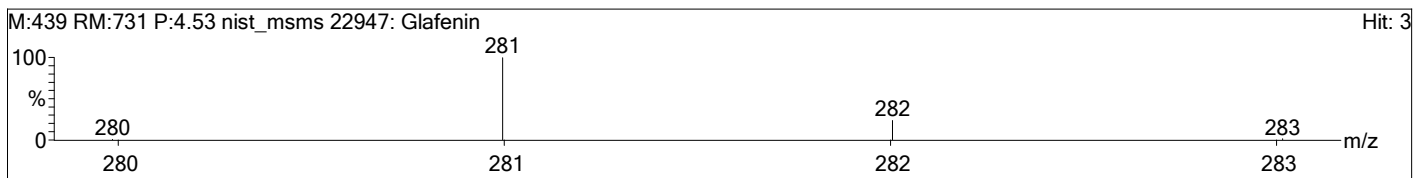

# TAMILNADU AGRICULTURAL UNIVERSITY - AGRICULTURAL MICROBIOLOGY

INSTRUMENT: PERKIN ELMER CLARUS SQ8C  
 INJECTION VOL: 1 MICRO LITER  
 SAMPLE ID : T260

COLOUMN: DB-5 MS CAPILARY STANDARD NON - POLARCOLOUMN  
 DIMENSION: 30Mts, ID: 0.25 mm, FILM: 0.25 IM CARRIER GAS: He

| # | RT     | Scan | Height     | Area      | Area % | Norm % |
|---|--------|------|------------|-----------|--------|--------|
| 8 | 29.689 | 5336 | 14,803,180 | 787,371.8 | 0.675  | 21.34  |

| PK # | RT     | Hit | Compound Name                                                                                                      | Match | R.Match | Prob. | CAS        | Library |
|------|--------|-----|--------------------------------------------------------------------------------------------------------------------|-------|---------|-------|------------|---------|
| 8    | 29.689 | 1   | Oleic acid, 3-(octadecyloxy)propyl ester                                                                           | 407   | 455     | 10.0  | 17367-41-8 | mainlib |
|      |        | 2   | 1,2-Dihydroprednisolone, 21-O-acetyl-11-thiocaynato-                                                               | 401   | 463     | 7.9   | 50733-59-0 | mainlib |
|      |        | 3   | 9-Methylcorticosterone acetate                                                                                     | 397   | 461     | 6.7   |            | mainlib |
|      |        | 4   | Spirost-8-en-11-one, 3-hydroxy-, (3á,5à,14á,20á,22á,25R)-                                                          | 391   | 450     | 5.2   | 58072-54-1 | mainlib |
|      |        | 5   | Pregnan-20-one, 3-(acetyloxy)-5,6-epoxy-, (3á,5á,6á)-                                                              | 388   | 438     | 4.6   | 6661-94-5  | mainlib |
|      |        | 6   | 17Beta-acetoxy-17alpha-ethynyl-6beta-methoxy-3alpha,5-cyclo-5alpha-androstan-19-oic acid                           | 384   | 422     | 3.9   |            | mainlib |
|      |        | 7   | 1,9-Dioxa-5-thianonane, 3,7-bis(9-borabicyclo[3.3.1]non-9-yloxy)-1,9-diphenyl-                                     | 381   | 403     | 3.5   |            | mainlib |
|      |        | 8   | 1h-Pyrrole-3,4-diacetic acid, 2-acetoxymethyl-5-methoxycarbonyl-, dimethyl ester                                   | 379   | 434     | 3.2   |            | mainlib |
|      |        | 9   | 4-Acetyloxyimino-6,6-dimethyl-3-methylsulfanyl-4,5,6,7-tetrahydro-benzo[c]thiophene-1-carboxylic acid methyl ester | 375   | 435     | 2.7   |            | mainlib |
|      |        | 10  | 9à-Fluoro-11á,17á-diol-17à-methyl-5à-androstan-3-one                                                               | 370   | 441     | 2.2   |            | mainlib |

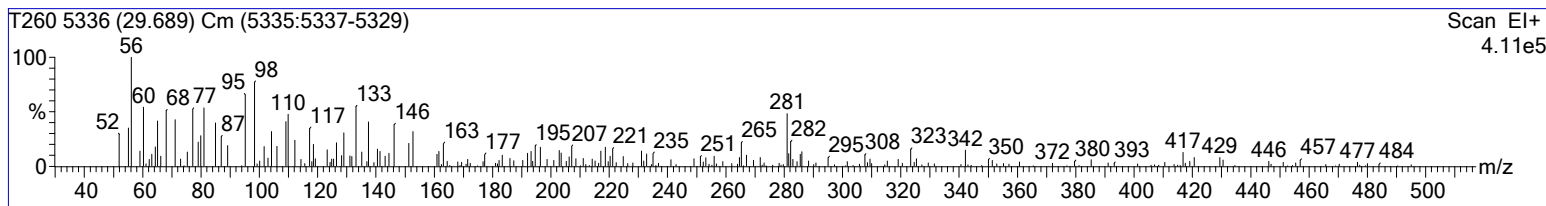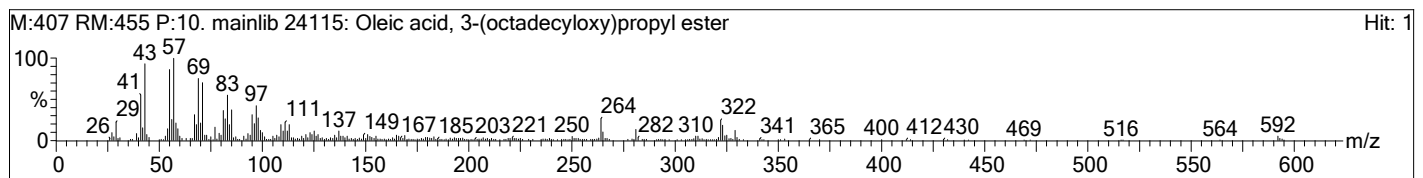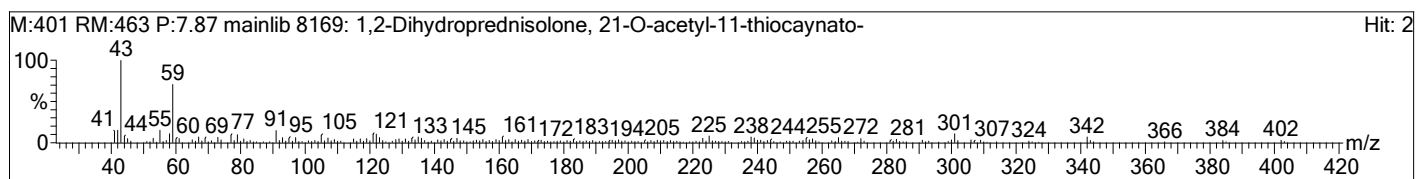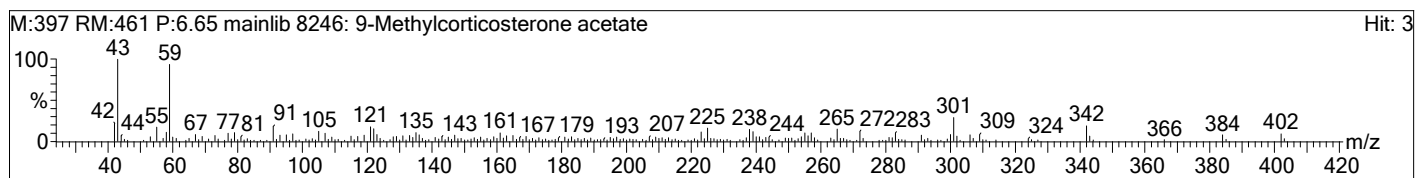



# TAMILNADU AGRICULTURAL UNIVERSITY - AGRICULTURAL MICROBIOLOGY

INSTRUMENT: PERKIN ELMER CLARUS SQ8C  
 INJECTION VOL: 1 MICRO LITER  
 SAMPLE ID : T260

COLOUMN: DB-5 MS CAPILARY STANDARD NON - POLARCOLOUMN  
 DIMENSION: 30Mts, ID: 0.25 mm, FILM: 0.25 IM CARRIER GAS: He

| # | RT     | Scan | Height     | Area        | Area % | Norm % |
|---|--------|------|------------|-------------|--------|--------|
| 9 | 29.764 | 5351 | 15,481,806 | 1,236,610.0 | 1.060  | 33.52  |

| Pk # | RT     | Hit | Compound Name                                                                                                                                                           | Match | R.Match | Prob. | CAS         | Library |
|------|--------|-----|-------------------------------------------------------------------------------------------------------------------------------------------------------------------------|-------|---------|-------|-------------|---------|
| 9    | 29.764 | 1   | 7aH-Cyclopenta[a]cyclopropa[f]cycloundecene-2, 4,7,7a,10,11-hexol, 1,1a,2,3,4,4a,5,6,7,10,11,11a-dodecahydro-1,1,3,6,9-pentamethyl-, 2,4,7,10,11-pentaacetate           | 391   | 414     | 5.8   | 51906-08-2  | mainlib |
|      |        | 2   | 4-Acetyloximino-6,6-dimethyl-3-methylsulfanyl-4,5,6,7-tetrahydro-benzo[c]thiophene-1-carboxylic acid methyl ester                                                       | 389   | 444     | 5.3   |             | mainlib |
|      |        | 3   | 3-Isopropyl-6a,7,10b-trimethyl-dodecahydro-benzo[f]chromene-7,8-dicarboxylic acid, dimethyl ester                                                                       | 389   | 426     | 5.3   |             | mainlib |
|      |        | 4   | 5H-Cyclopropa[3,4]benz[1,2-e]azulen-5-one, 9,9a-bis(acetyloxy)-3-[(acetyloxy)methyl]-1,1a,1b,4,4a,7a,7b,8,9,9a-decahydro-4,4a,7b-trihydroxy-1,1,6,8-tetramethyl-        | 380   | 401     | 3.8   | 77646-80-1  | mainlib |
|      |        | 5   | 8H-Pyrano[3,4-b]pyrimido[5,4-d]furane, 5,6-dihydro-4-hydrazino-6,6-dimethyl-2-methylthio-                                                                               | 377   | 448     | 3.4   | 253146-95-1 | mainlib |
|      |        | 6   | 3-[3-(1,5-Dimethylhexyl)-7-(2-hydroxy-1-methylethyl)-3a,6,9b-trimethyl-2,3,3a,4,5,6,7,8,9,9b-decahydro-1H-cyclopenta[a]naphthalen-6-yl]propanoic acid, methyl ester     | 375   | 391     | 3.1   |             | mainlib |
|      |        | 7   | 3,9-Ethylene-1,4,6,8,11,13-hexaazatetracyclo[9.3.0.0(3,10).0(4,8)]tetradeca-5,7,12,14-tetraone, 2,6,13,trimethyl-2-phenyl-                                              | 373   | 406     | 2.9   |             | mainlib |
|      |        | 8   | Octadecane, 1,1'-[1,3-propanediylbis(oxy)]bis-                                                                                                                          | 371   | 387     | 2.7   | 17367-38-3  | mainlib |
|      |        | 9   | 5H-Cyclopropa(3,4)benz(1,2-e)azulen-5-one, 1,1a-à,1b-à,4,4a,7a-à,7b,8,9,9a-decahydro-4a-à,7b-à,9a-à-trihydroxy-3-(hydroxymethyl)-1,1,6,8-à-tetramethyl-, 9a-isobutyrate | 367   | 388     | 2.2   | 25090-74-8  | mainlib |
|      |        | 10  | 25-Norisopropyl-9,19-cyclolanostan-22-en-24-one, 3-acetoxy-24-phenyl-4,4,14-trimethyl-                                                                                  | 366   | 374     | 2.2   |             | mainlib |

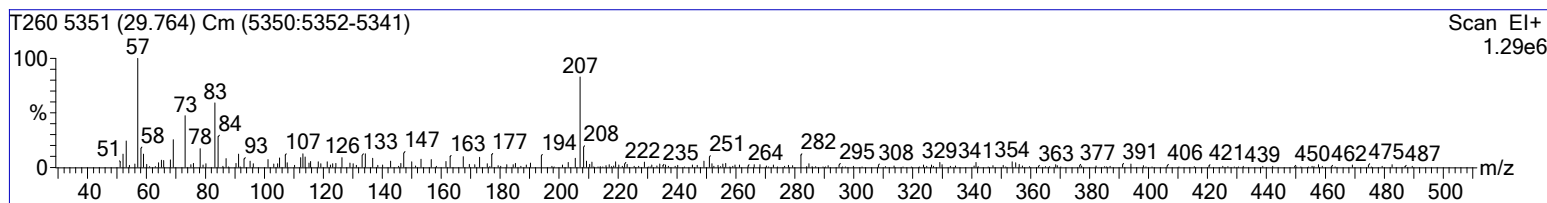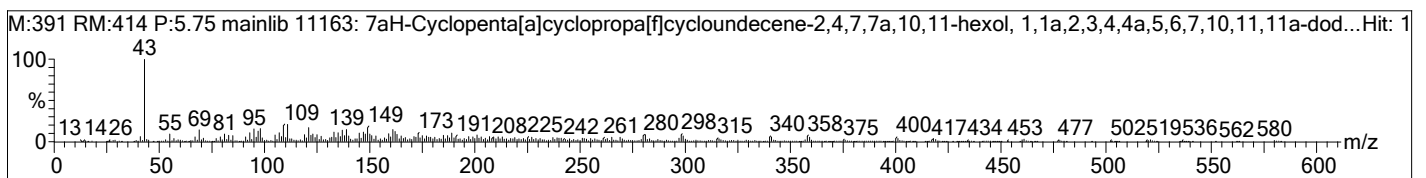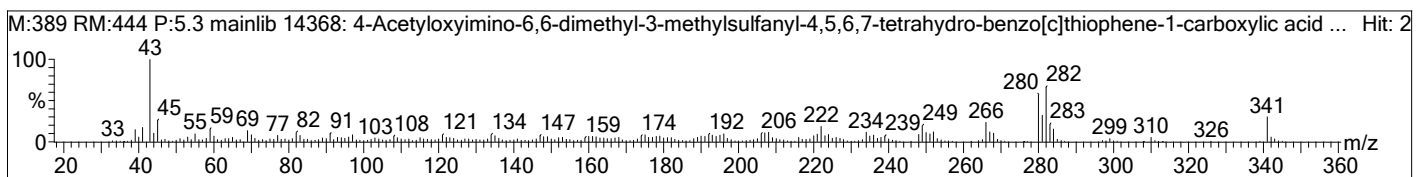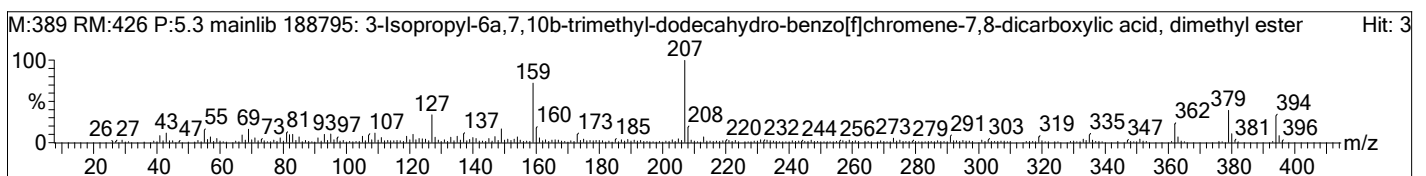

# TAMILNADU AGRICULTURAL UNIVERSITY - AGRICULTURAL MICROBIOLOGY

INSTRUMENT: PERKIN ELMER CLARUS SQ8C  
 INJECTION VOL: 1 MICRO LITER  
 SAMPLE ID : T260

COLOUMN: DB-5 MS CAPILARY STANDARD NON - POLARCOLOUMN  
 DIMENSION: 30Mts, ID: 0.25 mm, FILM: 0.25 IM CARRIER GAS: He

| #  | RT     | Scan | Height     | Area        | Area % | Norm % |
|----|--------|------|------------|-------------|--------|--------|
| 10 | 29.884 | 5375 | 21,090,470 | 1,435,067.6 | 1.230  | 38.90  |

| Pk # | RT     | Hit | Compound Name                                                                                                                  | Match | R.Match | Prob. | CAS         | Library |
|------|--------|-----|--------------------------------------------------------------------------------------------------------------------------------|-------|---------|-------|-------------|---------|
| 10   | 29.884 | 1   | 1-(2-Acetoxyethyl)-3,6-diazahomoadamantan-9-one oxime                                                                          | 413   | 503     | 12.9  |             | mainlib |
|      |        | 2   | Glycine, N-[(3à,5à)-24-oxo-3-[(trimethylsilyl)oxy]cholan-24-yl]-, methyl ester                                                 | 399   | 456     | 8.1   | 57326-15-5  | mainlib |
|      |        | 3   | 1,8-Dioxa-5-thiaoctane, 8-(9-borabicyclo[3.3.1]non-9-yl)-3-(9-borabicyclo[3.3.1]non-9-yloxy)-1-phenyl-                         | 387   | 425     | 5.4   |             | mainlib |
|      |        | 4   | N-[3,5-Dinitropyridin-2-yl]glutamic acid                                                                                       | 386   | 455     | 5.2   |             | mainlib |
|      |        | 5   | Phenol, 2,6-dichloro-4-nitro-                                                                                                  | 383   | 489     | 4.6   | 618-80-4    | mainlib |
|      |        | 6   | Acetic acid, 2,3-dibromo-4-methoxymethoxy-1-methyl-pent-2-enyl ester                                                           | 379   | 484     | 3.9   |             | mainlib |
|      |        | 7   | Octyltrichlorosilane                                                                                                           | 378   | 515     | 3.7   | 5283-66-9   | replib  |
|      |        | 8   | 4,7,7-Trimethyl-3-oxo-2-oxabicyclo[2.2.1]heptane-1-carboxylic acid, 2,4,4-trimethyl-3-(3-oxo-but-1-enyl)-cyclohex-2-enyl ester | 377   | 463     | 3.6   |             | mainlib |
|      |        | 9   | 1-Bromo-11-iodoundecane                                                                                                        | 376   | 480     | 3.4   | 139123-69-6 | mainlib |
|      |        | 10  | 3,6,9,12-Tetraoxatetradecan-1-ol, 14-[4-(1,1,3,3-tetramethylbutyl)phenoxy]-                                                    | 375   | 457     | 3.3   | 2315-64-2   | mainlib |

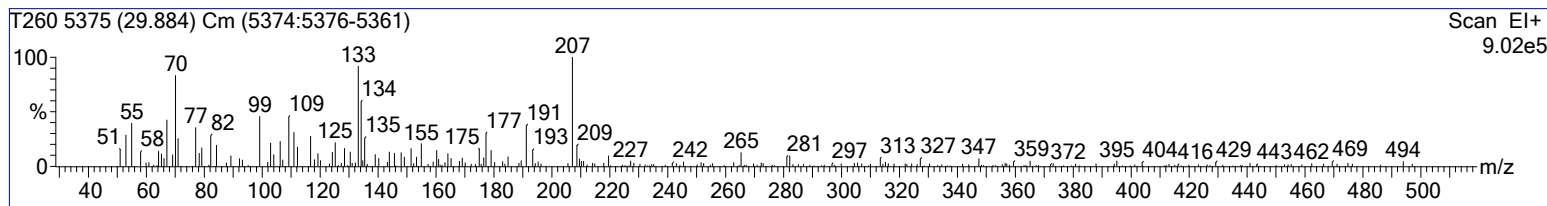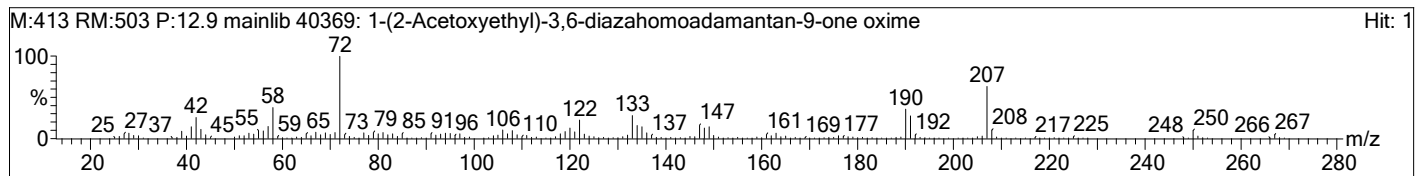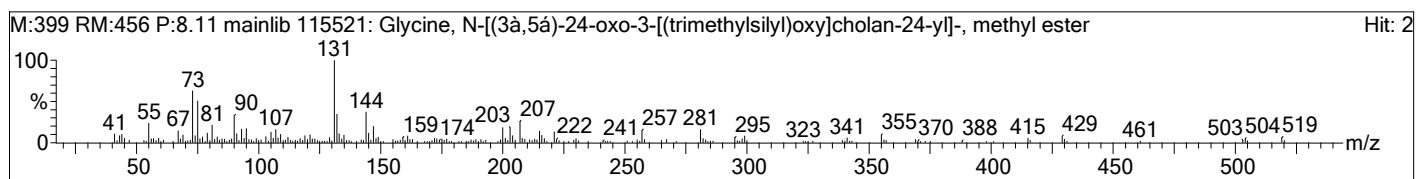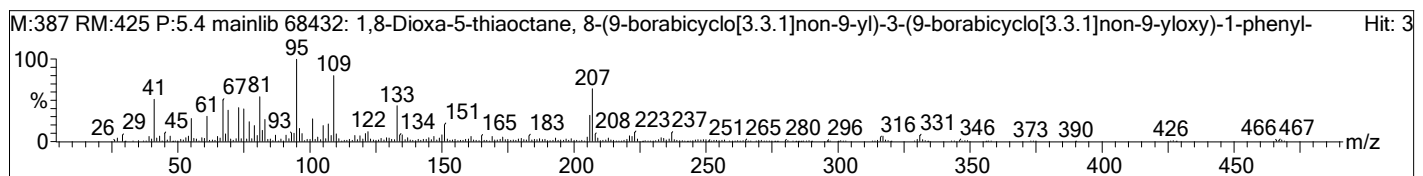

# TAMILNADU AGRICULTURAL UNIVERSITY - AGRICULTURAL MICROBIOLOGY

INSTRUMENT: PERKIN ELMER CLARUS SQ8C  
 INJECTION VOL: 1 MICRO LITER  
 SAMPLE ID : T260

COLOUMN: DB-5 MS CAPILARY STANDARD NON - POLARCOLOUMN  
 DIMENSION: 30Mts, ID: 0.25 mm, FILM: 0.25 IM CARRIER GAS: He

| #  | RT     | Scan | Height     | Area        | Area % | Norm % |
|----|--------|------|------------|-------------|--------|--------|
| 11 | 30.034 | 5405 | 28,574,880 | 3,688,861.0 | 3.161  | 100.00 |

| Pk # | RT     | Hit | Compound Name                                                                                                                                                                                                            | Match | R.Match | Prob. | CAS        | Library   |
|------|--------|-----|--------------------------------------------------------------------------------------------------------------------------------------------------------------------------------------------------------------------------|-------|---------|-------|------------|-----------|
| 11   | 30.034 | 1   | 2,4,6-Decatrienoic acid, 1a,2,5,5a,6,9,10,10a-octahydro-5,5a-dihydroxy-4-(hydroxymethyl)-1,7,9-trimethyl-1-[[[2-methyl-1-oxo-2-butenyl]oxy]methyl]-11-oxo-1H-2,8a-methanocyclopenta[a]cyclopropa[e]cyclodecen-6-yl ester | 457   | 457     | 18.3  | 77646-20-9 | mainlib   |
|      |        | 2   | Corynan-17-ol, 18,19-didehydro-10-methoxy-, acetate (ester)                                                                                                                                                              | 447   | 495     | 12.9  | 56053-13-5 | mainlib   |
|      |        | 3   | Bufa-20,22-dienolide, 14,15-epoxy-3,11-dihydroxy-, (3á,5á,11à,15á)-                                                                                                                                                      | 442   | 468     | 10.4  | 39005-15-7 | mainlib   |
|      |        | 4   | Aconitine                                                                                                                                                                                                                | 421   | 518     | 4.4   | 302-27-2   | nist_msms |
|      |        | 5   | Pyrano[4,3-b]benzopyran-1,9-dione, 5a-methoxy-9a-methyl-3-(1-propenyl)perhydro-                                                                                                                                          | 420   | 457     | 4.3   |            | mainlib   |
|      |        | 6   | Cholestan-3-ol, 2-methylene-, (3á,5á)-                                                                                                                                                                                   | 409   | 537     | 2.9   | 22599-96-8 | mainlib   |
|      |        | 7   | Fumaric acid, 10-chlorodecyl octyl ester                                                                                                                                                                                 | 407   | 474     | 2.7   |            | mainlib   |
|      |        | 8   | 1,2,3,4-Tetrahydroisoquinolin, 2-acetyl-6,7-dimethoxy-1-phenmethylene-                                                                                                                                                   | 407   | 458     | 2.7   |            | mainlib   |
|      |        | 9   | Doconexent                                                                                                                                                                                                               | 406   | 459     | 2.6   | 6217-54-5  | mainlib   |
|      |        | 10  | Aconitine                                                                                                                                                                                                                | 403   | 456     | 4.4   | 302-27-2   | nist_msms |

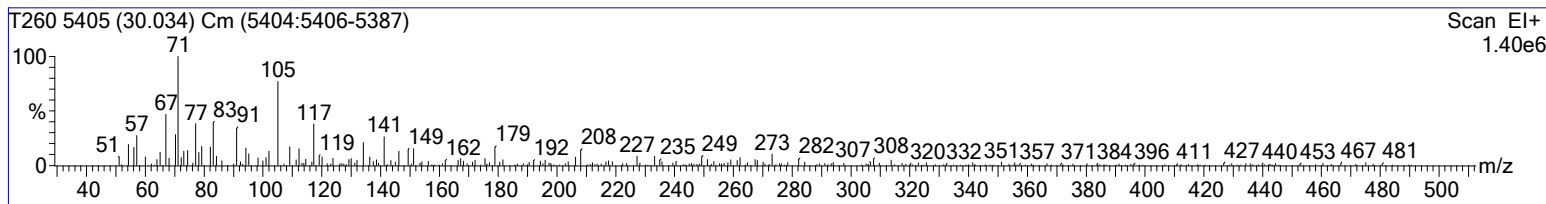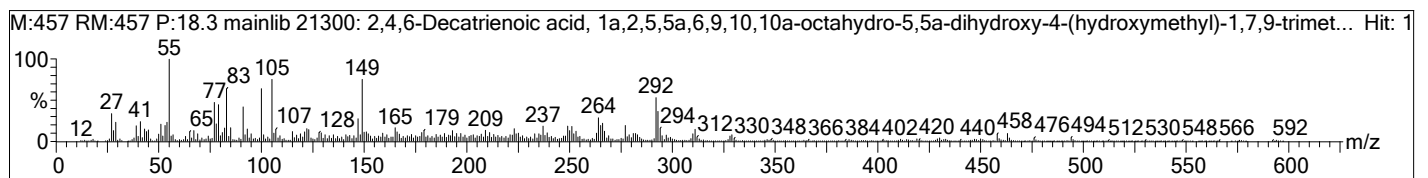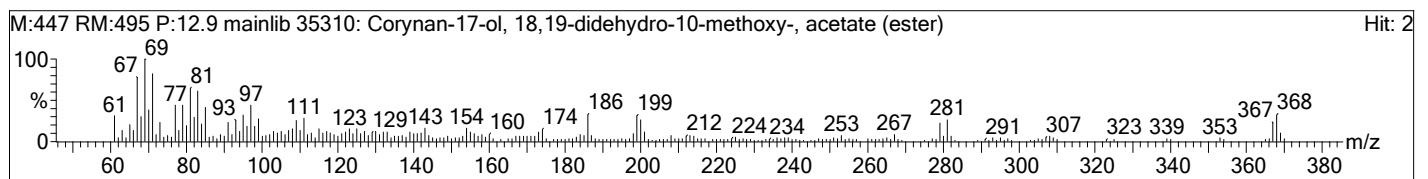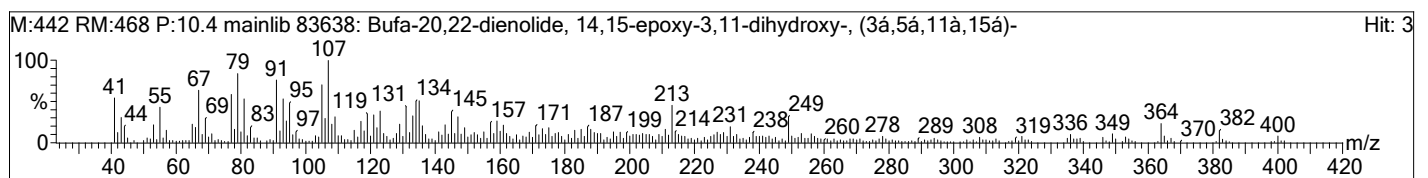

# TAMILNADU AGRICULTURAL UNIVERSITY - AGRICULTURAL MICROBIOLOGY

INSTRUMENT: PERKIN ELMER CLARUS SQ8C  
 INJECTION VOL: 1 MICRO LITER  
 SAMPLE ID : T260

COLOUMN: DB-5 MS CAPILARY STANDARD NON - POLARCOLOUMN  
 DIMENSION: 30Mts, ID: 0.25 mm, FILM: 0.25 IM CARRIER GAS: He

| #  | RT     | Scan | Height     | Area      | Area % | Norm % |
|----|--------|------|------------|-----------|--------|--------|
| 12 | 30.149 | 5428 | 20,890,436 | 788,216.6 | 0.675  | 21.37  |

| Pk # | RT     | Hit | Compound Name                                                                                                                 | Match | R.Match | Prob. | CAS        | Library   |
|------|--------|-----|-------------------------------------------------------------------------------------------------------------------------------|-------|---------|-------|------------|-----------|
| 12   | 30.149 | 1   | Tris(2-butoxyethyl) phosphate                                                                                                 | 423   | 720     | 8.1   | 78-51-3    | nist_msms |
|      |        | 2   | 7,8-Epoxy lanostan-11-ol, 3-acetoxy-                                                                                          | 423   | 426     | 8.1   |            | mainlib   |
|      |        | 3   | 9,19-Cyclolanostan-3-ol, 24,24-epoxymethano-, acetate                                                                         | 418   | 430     | 6.5   |            | mainlib   |
|      |        | 4   | Rhodopin                                                                                                                      | 412   | 413     | 5.1   | 105-92-0   | mainlib   |
|      |        | 5   | à-Hydroxybutyric acid                                                                                                         | 410   | 980     | 4.7   | 20016-85-7 | nist_msms |
|      |        | 6   | 2-n-Propyl-1-heptanol                                                                                                         | 409   | 991     | 4.6   | 10042-59-8 | nist_msms |
|      |        | 7   | Perhydroindene-4-carboxylic acid, 6-acetoxy-2,3-epoxy-1,1-epoxymethyl-3a-hydroxy-5-isopropenyl-7a-methyl-7-oxo-, methyl ester | 406   | 464     | 4.0   |            | mainlib   |
|      |        | 8   | Cholestane, 3,5-dichloro-6-nitro-, (3á,5à,6á)-                                                                                | 403   | 408     | 3.5   | 15505-92-7 | mainlib   |
|      |        | 9   | Valproic Acid                                                                                                                 | 398   | 981     | 2.9   | 99-66-1    | nist_msms |
|      |        | 10  | Tris(2-butoxyethyl) phosphate                                                                                                 | 395   | 620     | 8.1   | 78-51-3    | nist_msms |

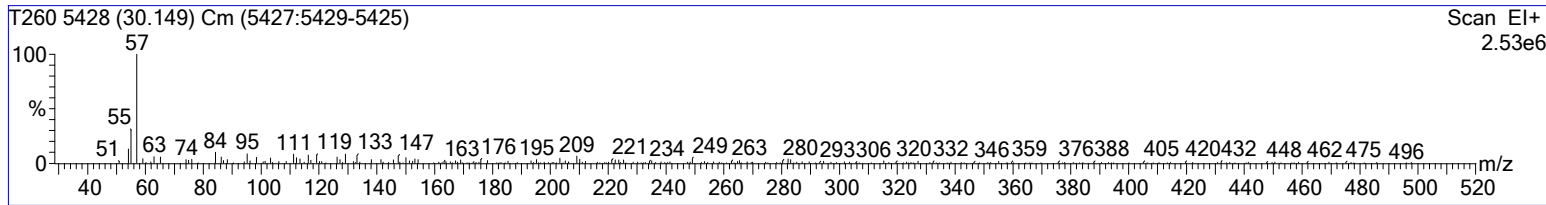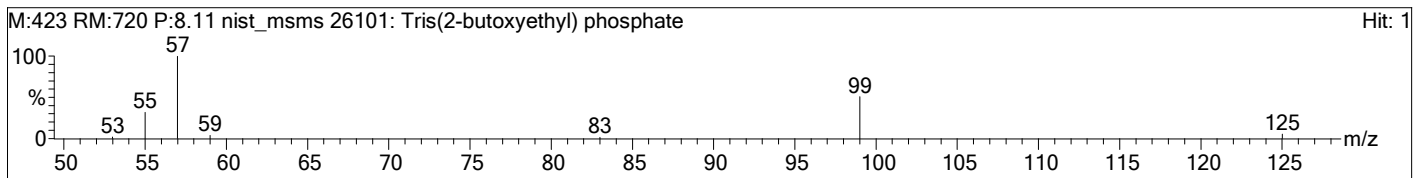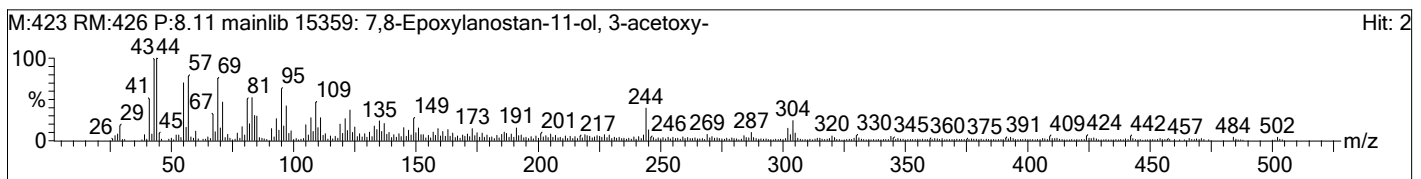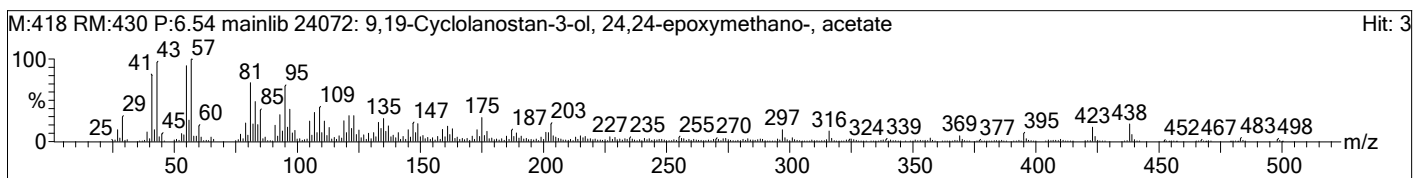

# TAMILNADU AGRICULTURAL UNIVERSITY - AGRICULTURAL MICROBIOLOGY

INSTRUMENT: PERKIN ELMER CLARUS SQ8C  
 INJECTION VOL: 1 MICRO LITER  
 SAMPLE ID : T260

COLOUMN: DB-5 MS CAPILARY STANDARD NON - POLARCOLOUMN  
 DIMENSION: 30Mts, ID: 0.25 mm, FILM: 0.25 IM CARRIER GAS: He

| #  | RT     | Scan | Height     | Area      | Area % | Norm % |
|----|--------|------|------------|-----------|--------|--------|
| 13 | 30.204 | 5439 | 18,941,208 | 809,714.3 | 0.694  | 21.95  |

| Pk # | RT     | Hit | Compound Name                                                                                                                                                                                              | Match | R.Match | Prob. | CAS        | Library |
|------|--------|-----|------------------------------------------------------------------------------------------------------------------------------------------------------------------------------------------------------------|-------|---------|-------|------------|---------|
| 13   | 30.204 | 1   | 10-Acetoxy-2-hydroxy-1,2,6a,6b,9,9,12a-heptamethyl-1,3,4,5,6,6a,6b,7,8,8a,9,10,11,12,12a,12b,13,14b-octadecahydro-2H-picene-4a-carboxylic acid, methyl ester                                               | 450   | 472     | 9.7   | 14356-56-0 | mainlib |
|      |        | 2   | Octadecane, 3-ethyl-5-(2-ethylbutyl)-                                                                                                                                                                      | 449   | 477     | 9.3   | 55282-12-7 | mainlib |
|      |        | 3   | Docosanoic acid, 1,2,3-propanetriyl ester                                                                                                                                                                  | 429   | 448     | 4.2   | 18641-57-1 | mainlib |
|      |        | 4   | Dodecanoic acid, 1a,2,5,5a,6,9,10,10a-octahydro-5a-hydroxy-4-(hydroxymethyl)-1,1,7,9-tetramethyl-6,11-dioxo-1H-2,8a-methanocyclopenta[a]cyclopropa[e]cyclododec-5-yl ester, [1aR-(1a,2a,5a,5a,8a,9a,10a)]- | 427   | 427     | 3.9   | 77508-68-0 | mainlib |
|      |        | 5   | 2-Myristinoyl pantetheine                                                                                                                                                                                  | 420   | 487     | 3.0   |            | mainlib |
|      |        | 6   | Oleic acid, 3-(octadecyloxy)propyl ester                                                                                                                                                                   | 420   | 462     | 3.0   | 17367-41-8 | mainlib |
|      |        | 7   | Octadecane, 3-ethyl-5-(2-ethylbutyl)-                                                                                                                                                                      | 417   | 473     | 9.3   | 55282-12-7 | replib  |
|      |        | 8   | 2-Nonadecanone 2,4-dinitrophenylhydrazine                                                                                                                                                                  | 417   | 447     | 2.6   | 28813-61-8 | mainlib |
|      |        | 9   | 6,19-Cycloandrostande-3,7-diol, 3a-methoxy-                                                                                                                                                                | 416   | 486     | 2.5   |            | mainlib |
|      |        | 10  | 1,25-Dihydroxyvitamin D3, TMS derivative                                                                                                                                                                   | 414   | 517     | 2.3   | 55759-94-9 | mainlib |

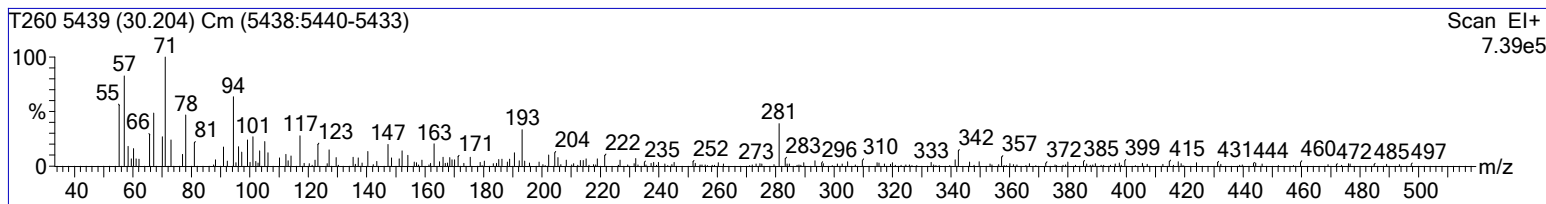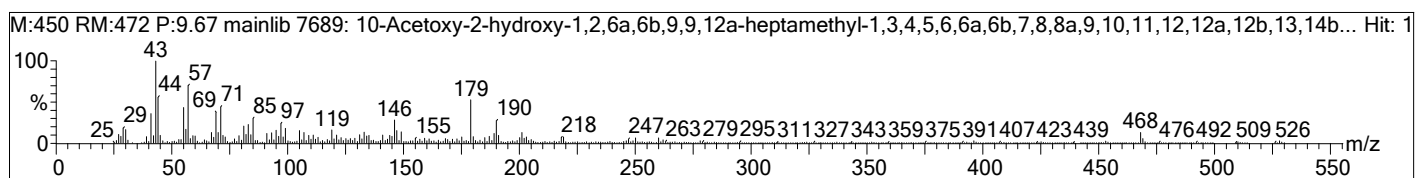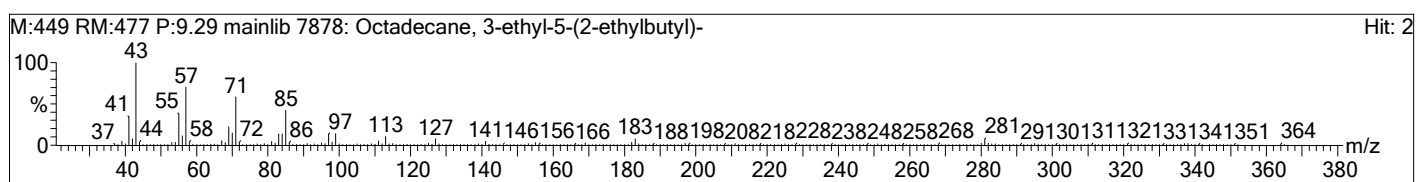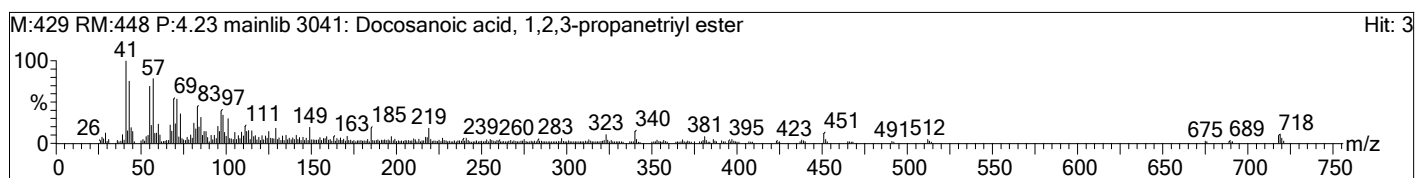

# TAMILNADU AGRICULTURAL UNIVERSITY - AGRICULTURAL MICROBIOLOGY

INSTRUMENT: PERKIN ELMER CLARUS SQ8C  
 INJECTION VOL: 1 MICRO LITER  
 SAMPLE ID : T260

COLOUMN: DB-5 MS CAPILARY STANDARD NON - POLARCOLOUMN  
 DIMENSION: 30Mts, ID: 0.25 mm, FILM: 0.25 IM CARRIER GAS: He

| #  | RT     | Scan | Height     | Area      | Area % | Norm % |
|----|--------|------|------------|-----------|--------|--------|
| 14 | 30.309 | 5460 | 16,295,227 | 699,237.6 | 0.599  | 18.96  |

| Pk # | RT     | Hit | Compound Name                                                                                                                                                                                                    | Match | R.Match | Prob. | CAS         | Library |
|------|--------|-----|------------------------------------------------------------------------------------------------------------------------------------------------------------------------------------------------------------------|-------|---------|-------|-------------|---------|
| 14   | 30.309 | 1   | 2-Nonadecanone 2,4-dinitrophenylhydrazine                                                                                                                                                                        | 396   | 427     | 15.5  | 28813-61-8  | mainlib |
|      |        | 2   | Hexadecanoic acid, 1a,2,5,5a,6,9,10,10a-octahydro-5a-hydroxy-4-(hydroxymethyl)-1,1,7,9-tetramethyl-6,11-dioxo-1H-2,8a-methanocyclopenta[a]cyclopropa[e]cyclodecen-5-yl ester, [1aR-(1aà,2à,5á,5aá,8aà,9à,10aà)]- | 373   | 373     | 5.6   | 77508-69-1  | mainlib |
|      |        | 3   | 2-Pyrrolidinethione, 4,4,5-trimethyl-5-(4,4-dimethyl-2-thioxo-5-pyrrolidinylidene)methyl-                                                                                                                        | 366   | 435     | 4.3   |             | mainlib |
|      |        | 4   | 17-Pentatriacontene                                                                                                                                                                                              | 361   | 382     | 3.5   | 6971-40-0   | mainlib |
|      |        | 5   | Azuleno[4,5-b]furan-2(3H)-one, decahydro-8,9-dihydroxy-6,9a-dimethyl-3-methylene-, [3aS-(3aà,6á,6aà,8à,9à,9aá,9bà)]-                                                                                             | 360   | 460     | 3.3   | 5090-67-5   | mainlib |
|      |        | 6   | Milbemycin b, 5-O-demethyl-28-deoxy-6,28-epoxy-25-(1-methylethyl)-13-(phenylthio)-, (6R,13R,25R)-i-Propyl 9-tetradecenoate                                                                                       | 359   | 419     | 3.2   | 104568-15-2 | mainlib |
|      |        | 7   |                                                                                                                                                                                                                  | 354   | 482     | 2.6   |             | mainlib |
|      |        | 8   | Carbamic acid, N-[10,11-dihydro-5-(2-methylamino-1-oxoethyl)-3-5H-dibenzo[b,f]azepinyl]-, ethyl ester                                                                                                            | 351   | 430     | 2.3   | 102821-92-1 | mainlib |
|      |        | 9   | 1-Hexacosanol                                                                                                                                                                                                    | 346   | 376     | 1.8   | 506-52-5    | replib  |
|      |        | 10  | 12-Dimethylamino-10-oxododecanoic acid                                                                                                                                                                           | 344   | 473     | 1.7   | 100913-51-7 | mainlib |

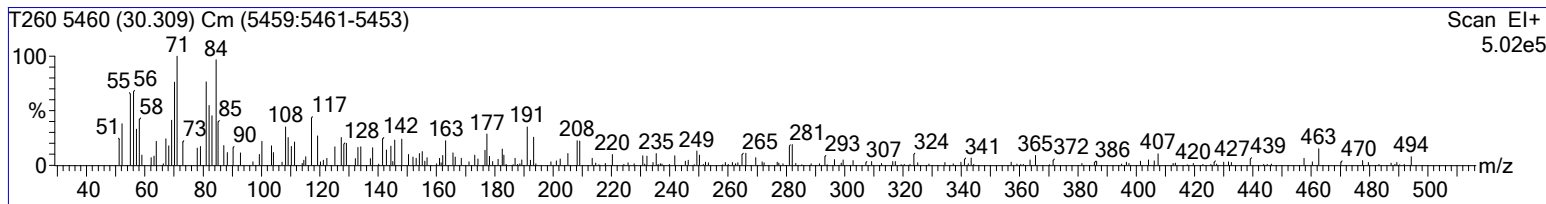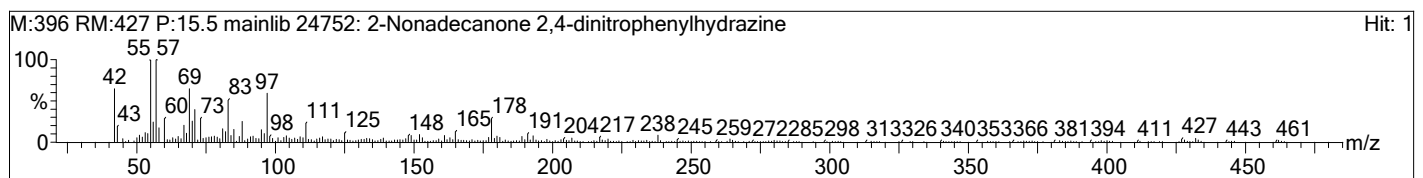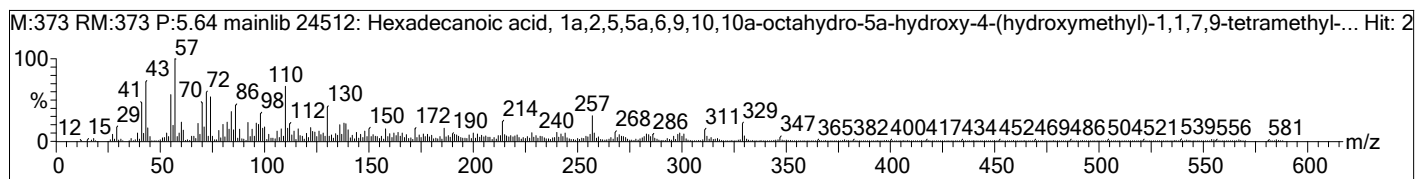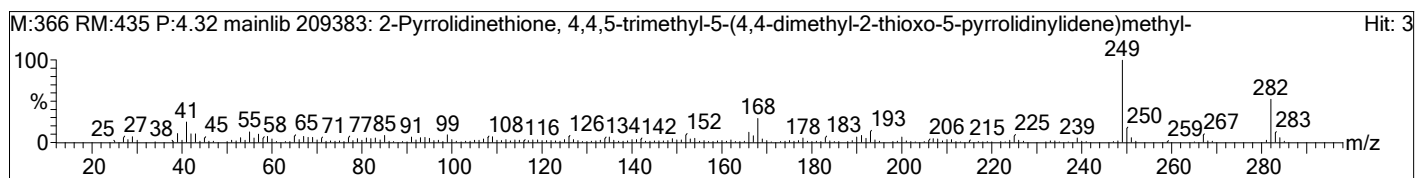

# TAMILNADU AGRICULTURAL UNIVERSITY - AGRICULTURAL MICROBIOLOGY

INSTRUMENT: PERKIN ELMER CLARUS SQ8C  
 INJECTION VOL: 1 MICRO LITER  
 SAMPLE ID : T260

COLOUMN: DB-5 MS CAPILARY STANDARD NON - POLARCOLOUMN  
 DIMENSION: 30Mts, ID: 0.25 mm, FILM: 0.25 IM CARRIER GAS: He

| #  | RT     | Scan | Height     | Area        | Area % | Norm % |
|----|--------|------|------------|-------------|--------|--------|
| 15 | 30.534 | 5505 | 19,734,680 | 1,467,774.9 | 1.258  | 39.79  |

| PK # | RT     | Hit | Compound Name                              | Match | R.Match | Prob. | CAS        | Library |
|------|--------|-----|--------------------------------------------|-------|---------|-------|------------|---------|
| 15   | 30.534 | 1   | Oleic acid, eicosyl ester                  | 449   | 463     | 6.8   | 22393-88-0 | mainlib |
|      |        | 2   | 2-Nonadecanone 2,4-dinitrophenylhydrazine  | 439   | 463     | 4.8   | 28813-61-8 | mainlib |
|      |        | 3   | 9-Octadecenoic acid (Z)-, octadecyl ester  | 436   | 451     | 4.2   | 17673-49-3 | mainlib |
|      |        | 4   | 9-Octadecenoic acid (Z)-, tetradecyl ester | 431   | 453     | 3.4   | 22393-85-7 | mainlib |
|      |        | 5   | 7,8-Epoxy lanostan-11-ol, 3-acetoxy-       | 428   | 431     | 3.0   |            | mainlib |
|      |        | 6   | 17-Pentatriacontene                        | 427   | 442     | 2.9   | 6971-40-0  | mainlib |
|      |        | 7   | 17-Pentatriacontene                        | 422   | 462     | 2.9   | 6971-40-0  | replib  |
|      |        | 8   | Undec-10-enoic acid, t-butyl ester         | 419   | 547     | 2.2   | 93757-41-6 | mainlib |
|      |        | 9   | 9-Hexadecenoic acid, eicosyl ester, (Z)-   | 418   | 437     | 2.1   | 22522-34-5 | mainlib |
|      |        | 10  | Cyclohexane, 1,3,5-trimethyl-2-octadecyl-  | 416   | 426     | 1.9   | 55282-34-3 | mainlib |

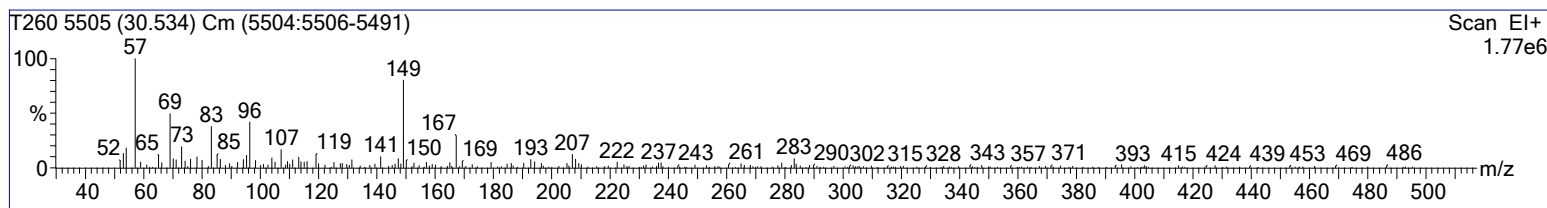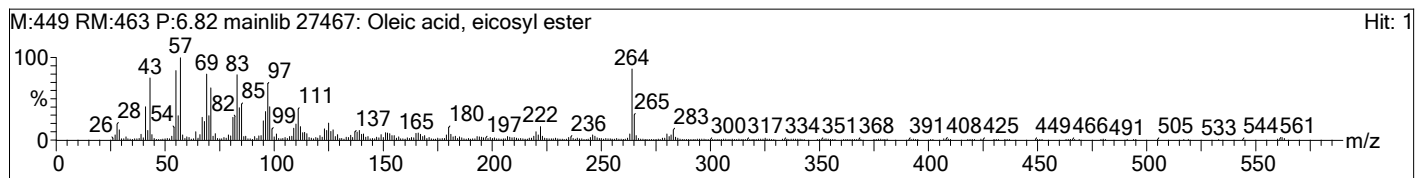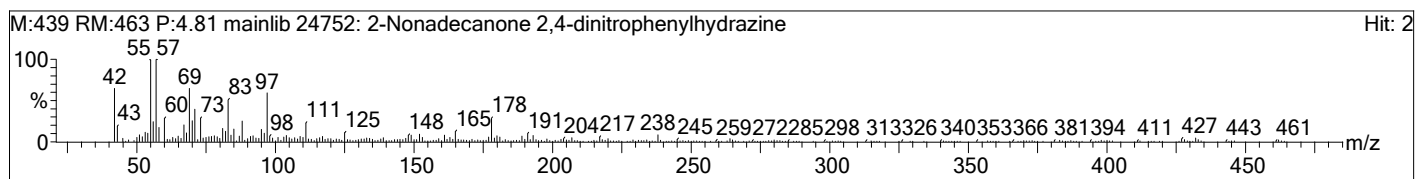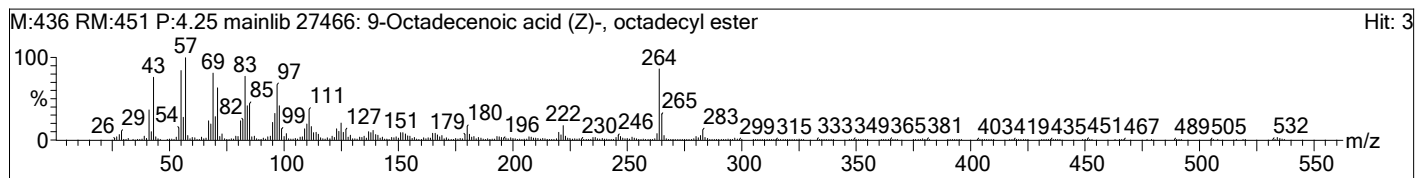

# TAMILNADU AGRICULTURAL UNIVERSITY - AGRICULTURAL MICROBIOLOGY

INSTRUMENT: PERKIN ELMER CLARUS SQ8C  
 INJECTION VOL: 1 MICRO LITER  
 SAMPLE ID : T260

COLOUMN: DB-5 MS CAPILARY STANDARD NON - POLARCOLOUMN  
 DIMENSION: 30Mts, ID: 0.25 mm, FILM: 0.25 IM CARRIER GAS: He

| #  | RT     | Scan | Height     | Area      | Area % | Norm % |
|----|--------|------|------------|-----------|--------|--------|
| 16 | 30.634 | 5525 | 14,682,743 | 784,324.6 | 0.672  | 21.26  |

| PK # | RT     | Hit | Compound Name                                                                                                                                                                             | Match | R.Match | Prob. | CAS         | Library   |
|------|--------|-----|-------------------------------------------------------------------------------------------------------------------------------------------------------------------------------------------|-------|---------|-------|-------------|-----------|
| 16   | 30.634 | 1   | Docosahexaenoic acid, 1,2,3-propanetriyl ester                                                                                                                                            | 460   | 484     | 8.0   | 11094-59-0  | mainlib   |
|      |        | 2   | 1H-Cyclopropa[3,4]benz[1,2-e]azulene-5,7b,9,9a-tetrol, 1a,1b,4,4a,5,7a,8,9-octahydro-3-(hydroxymethyl)-1,1,6,8-tetramethyl-, 5,9,9a-triacetate, [1aR-(1aà,1bá,4aá,5á,7aà,7bà,8à,9á,9aà)]- | 458   | 486     | 7.4   | 77508-64-6  | mainlib   |
|      |        | 3   | 5H-Cyclopropa[3,4]benz[1,2-e]azulen-5-one, 4,9,9a-tris(acetyloxy)-3-[(acetyloxy)methyl]-1,1a,1b,4,4a,7a,7b,8,9,9a-decahydro-4a,7b-dihydroxy-1,1,6,8-tetramethyl-                          | 458   | 481     | 7.4   | 77573-16-1  | mainlib   |
|      |        | 4   | 2-[4-methyl-6-(2,6,6-trimethylcyclohex-1-enyl)hexa-1,3,5-trienyl]cyclohex-1-en-1-carboxaldehyde                                                                                           | 452   | 494     | 5.8   |             | mainlib   |
|      |        | 5   | Fluoxymesterone                                                                                                                                                                           | 442   | 489     | 4.1   | 76-43-7     | replib    |
|      |        | 6   | Corynan-17-ol, 18,19-didehydro-10-methoxy-, acetate (ester)                                                                                                                               | 440   | 488     | 3.8   | 56053-13-5  | mainlib   |
|      |        | 7   | Bufa-20,22-dienolide, 14,15-epoxy-3,11-dihydroxy-, (3á,5á,11à,15á)-                                                                                                                       | 438   | 469     | 3.5   | 39005-15-7  | mainlib   |
|      |        | 8   | Fluoxymesterone                                                                                                                                                                           | 433   | 479     | 4.1   | 76-43-7     | replib    |
|      |        | 9   | 17a-Ethyl-3á-methoxy-17a-aza-D-homoandrost-5-ene-17-one                                                                                                                                   | 429   | 496     | 2.5   | 149942-11-0 | mainlib   |
|      |        | 10  | 5,6,7,3',4'-Pentamethoxyflavone                                                                                                                                                           | 426   | 509     | 2.2   | 2306-27-6   | nist_msms |

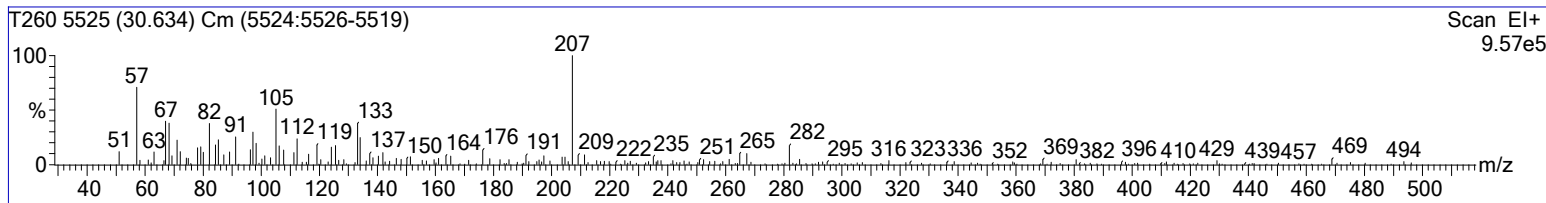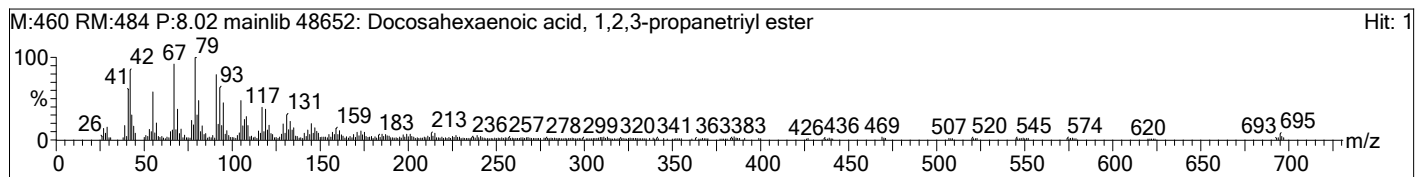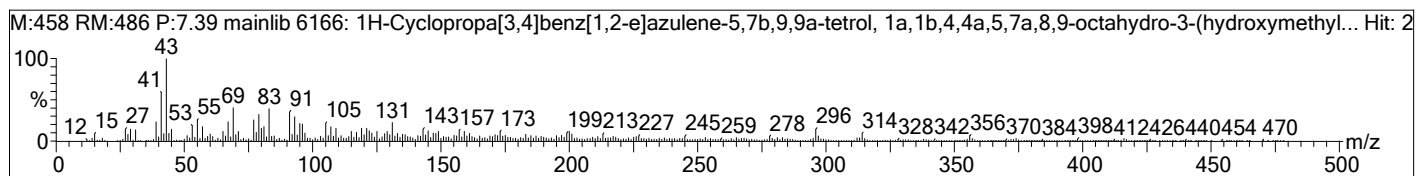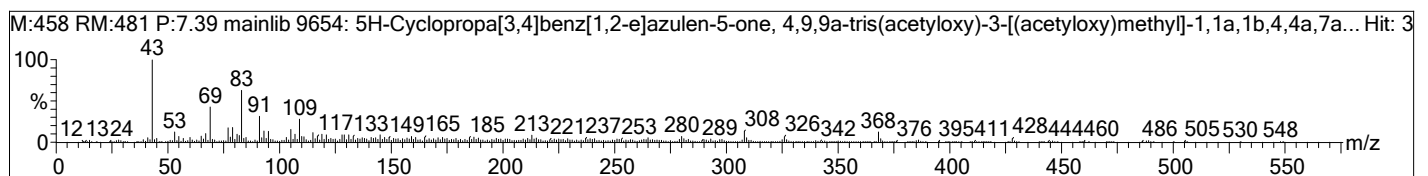



# TAMILNADU AGRICULTURAL UNIVERSITY - AGRICULTURAL MICROBIOLOGY

INSTRUMENT: PERKIN ELMER CLARUS SQ8C  
 INJECTION VOL: 1 MICRO LITER  
 SAMPLE ID : T260

COLOUMN: DB-5 MS CAPILARY STANDARD NON - POLARCOLOUMN  
 DIMENSION: 30Mts, ID: 0.25 mm, FILM: 0.25 IM CARRIER GAS: He

| #  | RT     | Scan | Height     | Area      | Area % | Norm % |
|----|--------|------|------------|-----------|--------|--------|
| 17 | 30.749 | 5548 | 17,942,240 | 781,243.6 | 0.669  | 21.18  |

| Pk # | RT     | Hit | Compound Name                                                                                     | Match | R.Match | Prob. | CAS | Library    |
|------|--------|-----|---------------------------------------------------------------------------------------------------|-------|---------|-------|-----|------------|
| 17   | 30.749 | 1   | 3-Isopropyl-6a,7,10b-trimethyl-dodecahydro-benzo[f]chromene-7,8-dicarboxylic acid, dimethyl ester | 409   | 466     | 9.6   |     | mainlib    |
|      |        | 2   | 4,4,6a,6b,8a,11,11,14b-Octamethyl-docosahydropicen-3-ol                                           | 401   | 428     | 7.1   |     | mainlib    |
|      |        | 3   | Dynorphin A (7-17), porcine                                                                       | 398   | 413     | 6.3   |     | nist_msms2 |
|      |        | 4   | 3-(2-Ethoxycarbonylmethylamino)-2-(4-chlorophenyl)-thioacrylsaeuremorpholid                       | 397   | 471     | 6.1   |     | mainlib    |
|      |        | 5   | 2-Picenol, 4,4,6a,6b,8a,11,11,14b-octamethylperhydro                                              | 397   | 425     | 6.1   |     | mainlib    |
|      |        | 6   | 1,2-Bis[1-(2-hydroxyethyl)-3,6-diazahomoadamantantydene-9]hydrazine                               | 396   | 429     | 5.8   |     | mainlib    |
|      |        | 7   | 2-[2-(4-Chlorophenyl)-3-morpholin-4-yl-3-thioxo-propenylamino]malonic acid, diethyl ester         | 395   | 434     | 5.6   |     | mainlib    |
|      |        | 8   | Dynorphin A (7-17), porcine                                                                       | 392   | 420     | 4.9   |     | nist_msms2 |
|      |        | 9   | Dynorphin A (7-17), porcine                                                                       | 391   | 417     | 4.7   |     | nist_msms2 |
|      |        | 10  | Dynorphin A (7-17), porcine                                                                       | 384   | 399     | 3.6   |     | nist_msms2 |

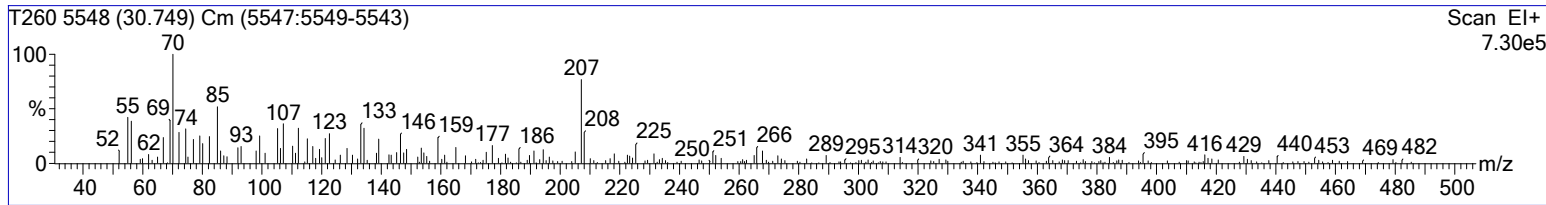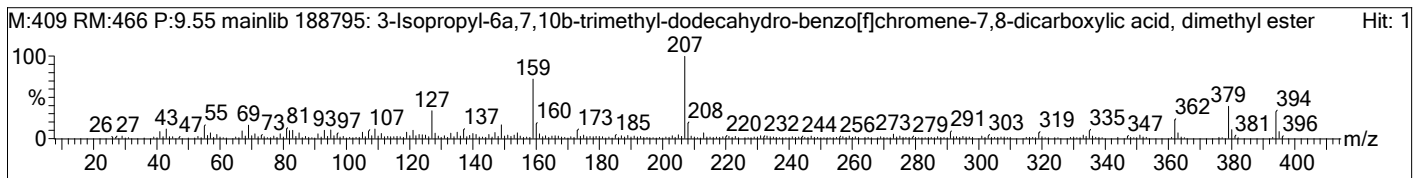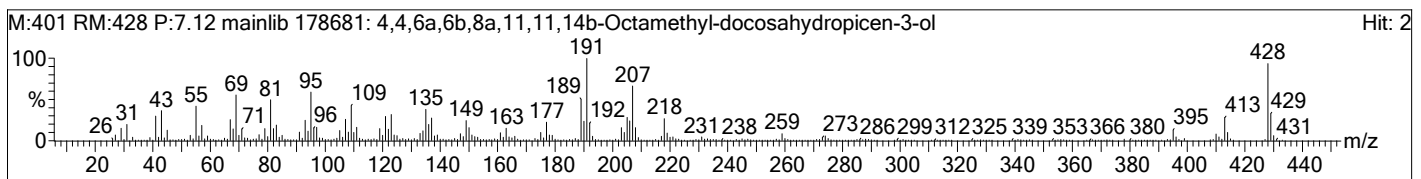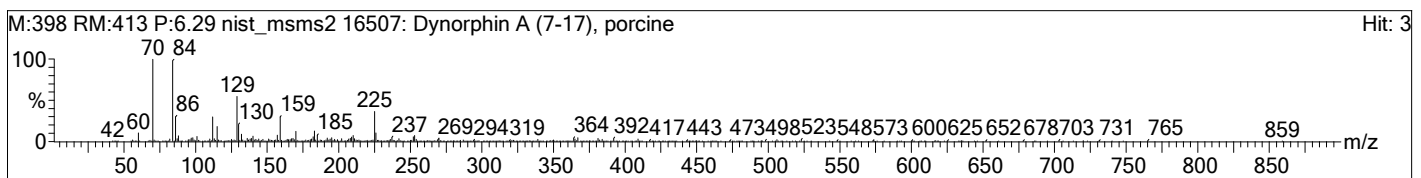

# TAMILNADU AGRICULTURAL UNIVERSITY - AGRICULTURAL MICROBIOLOGY

INSTRUMENT: PERKIN ELMER CLARUS SQ8C  
 INJECTION VOL: 1 MICRO LITER  
 SAMPLE ID : T260

COLOUMN: DB-5 MS CAPILARY STANDARD NON - POLARCOLOUMN  
 DIMENSION: 30Mts, ID: 0.25 mm, FILM: 0.25 IM CARRIER GAS: He

| #  | RT     | Scan | Height     | Area        | Area % | Norm % |
|----|--------|------|------------|-------------|--------|--------|
| 18 | 30.874 | 5573 | 16,203,522 | 1,420,392.1 | 1.217  | 38.50  |

| Pk # | RT     | Hit | Compound Name                                                                          | Match | R.Match | Prob. | CAS        | Library |
|------|--------|-----|----------------------------------------------------------------------------------------|-------|---------|-------|------------|---------|
| 18   | 30.874 | 1   | Octadecane, 1,1'-[1,3-propanediylbis(oxy)]bis-                                         | 432   | 443     | 6.0   | 17367-38-3 | mainlib |
|      |        | 2   | Spirost-8-en-11-one, 3-hydroxy-, (3á,5à,14á,20á,22á,25R)-                              | 429   | 473     | 5.3   | 58072-54-1 | mainlib |
|      |        | 3   | Stearic acid, 3-(octadecyloxy)propyl ester                                             | 429   | 450     | 5.3   | 17367-40-7 | mainlib |
|      |        | 4   | 2,4-Di-tert-butylthiophenol                                                            | 419   | 586     | 3.7   | 19728-43-9 | mainlib |
|      |        | 5   | 9-Octadecenoic acid, (2-phenyl-1,3-dioxolan-4-yl)methyl ester, cis-                    | 419   | 449     | 3.7   | 56599-45-2 | mainlib |
|      |        | 6   | 4-Dehydroxy-N-(4,5-methylenedioxy-2-nitrobenzylidene)tyramine                          | 412   | 494     | 2.9   |            | mainlib |
|      |        | 7   | Strychane, 1-acetyl-20à-hydroxy-16-methylene-                                          | 412   | 465     | 2.9   | 2111-98-0  | mainlib |
|      |        | 8   | 3-Isopropyl-6a,10b-dimethyl-8-(2-oxo-2-phenylethyl)-dodecahydro-benzof[f]chromen-7-one | 412   | 449     | 2.9   |            | mainlib |
|      |        | 9   | Demecolcine                                                                            | 405   | 465     | 2.2   | 477-30-5   | replib  |
|      |        | 10  | Octadecanoic acid, (2-phenyl-1,3-dioxolan-4-yl)methyl ester, cis-                      | 405   | 441     | 2.2   | 56599-88-3 | mainlib |

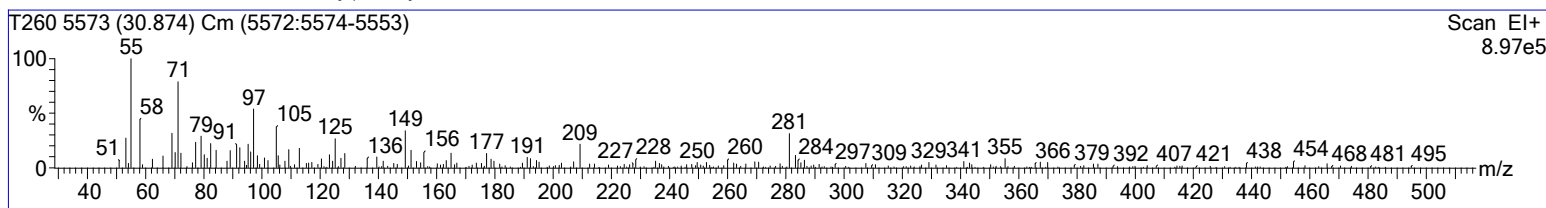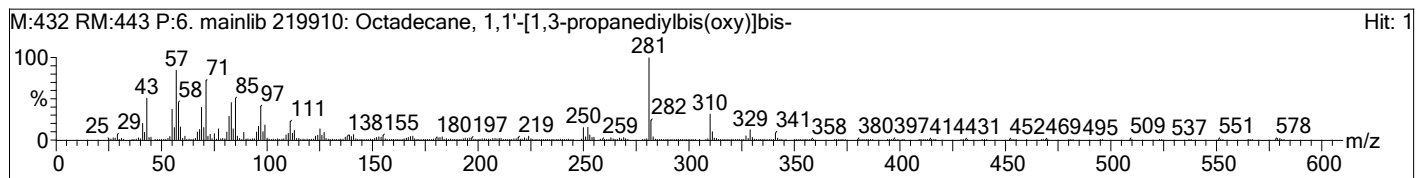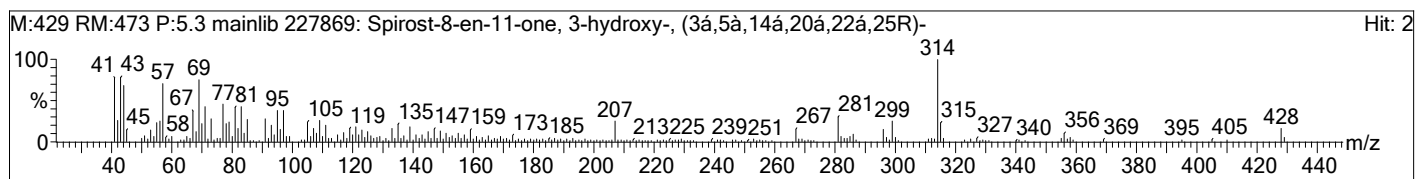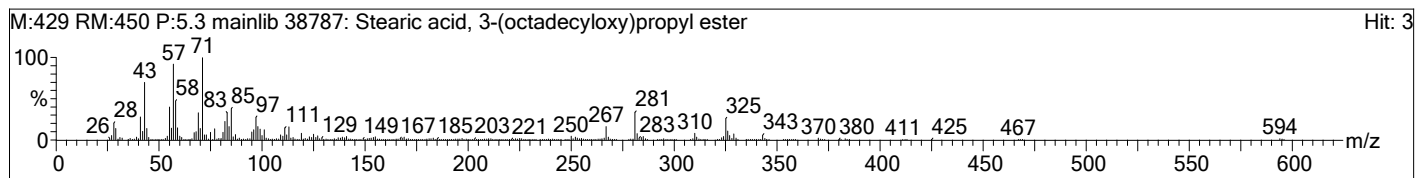

# TAMILNADU AGRICULTURAL UNIVERSITY - AGRICULTURAL MICROBIOLOGY

INSTRUMENT: PERKIN ELMER CLARUS SQ8C  
 INJECTION VOL: 1 MICRO LITER  
 SAMPLE ID : T260

COLOUMN: DB-5 MS CAPILARY STANDARD NON - POLARCOLOUMN  
 DIMENSION: 30Mts, ID: 0.25 mm, FILM: 0.25 IM CARRIER GAS: He

| #  | RT     | Scan | Height     | Area      | Area % | Norm % |
|----|--------|------|------------|-----------|--------|--------|
| 19 | 30.904 | 5579 | 17,055,568 | 726,942.8 | 0.623  | 19.71  |

| Pk # | RT     | Hit | Compound Name                                                                                                        | Match | R.Match | Prob. | CAS        | Library |
|------|--------|-----|----------------------------------------------------------------------------------------------------------------------|-------|---------|-------|------------|---------|
| 19   | 30.904 | 1   | 17-Pentatriacontene                                                                                                  | 437   | 464     | 10.4  | 6971-40-0  | mainlib |
|      |        | 2   | 4,7-Methano-1H-inden-1-one, 3,4,5,6,7,8,8-heptachloro-3a,4,5,6,7,7a-hexahydro-, (3aà,4á,5à,6à,7á,7aà)-               | 435   | 470     | 9.6   | 51179-71-6 | mainlib |
|      |        | 3   | Hexanoic acid, 3,5,5-trimethyl-, 1,2,3-propanetriyl ester                                                            | 420   | 522     | 5.8   | 56554-53-1 | mainlib |
|      |        | 4   | Propanoic acid, 2-(3-acetoxy-4,4,14-trimethylandrost-8-en-17-yl)-                                                    | 418   | 431     | 5.4   |            | mainlib |
|      |        | 5   | 1-Dodecanol, 3,7,11-trimethyl-                                                                                       | 411   | 535     | 4.1   | 6750-34-1  | replib  |
|      |        | 6   | Norgestrel, bis(trimethylsilyl) derivative                                                                           | 409   | 435     | 3.8   |            | mainlib |
|      |        | 7   | Azuleno[4,5-b]furan-2(3H)-one, decahydro-8,9-dihydroxy-6,9a-dimethyl-3-methylene-, [3aS-(3aà,6á,6aà,8à,9à,9aá,9bà)]- | 408   | 509     | 3.7   | 5090-67-5  | mainlib |
|      |        | 8   | n-Butyl ricinoleate                                                                                                  | 407   | 470     | 3.5   | 151-13-3   | mainlib |
|      |        | 9   | Hexadecane, 1,1-bis(dodecyloxy)-                                                                                     | 402   | 460     | 2.8   | 56554-64-4 | mainlib |
|      |        | 10  | 2-Eicosanol                                                                                                          | 399   | 456     | 2.5   | 4340-76-5  | mainlib |

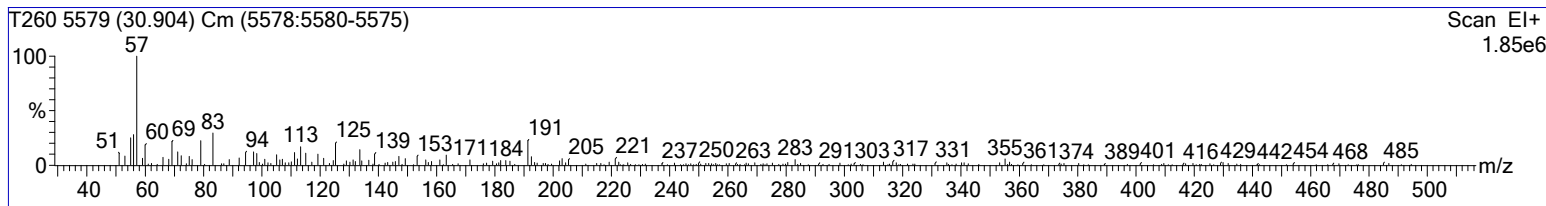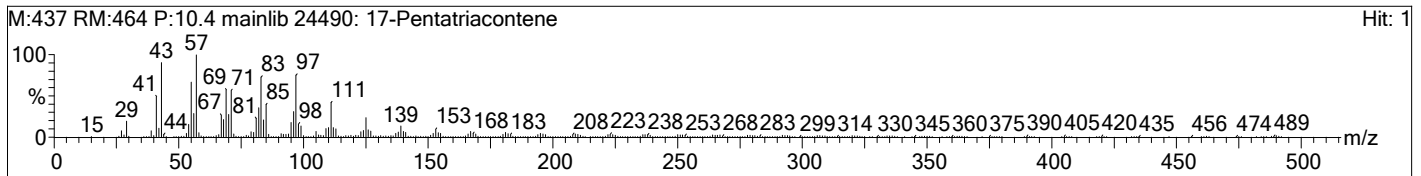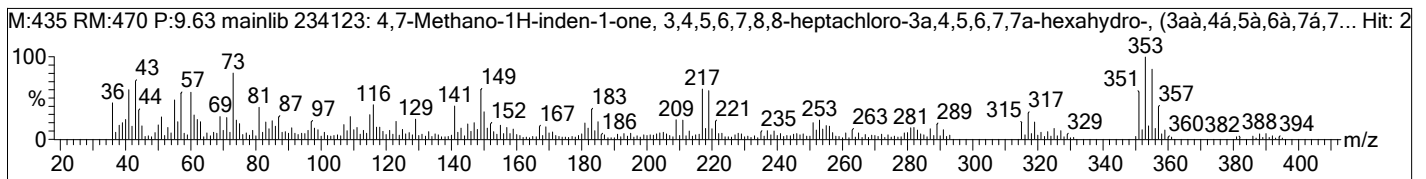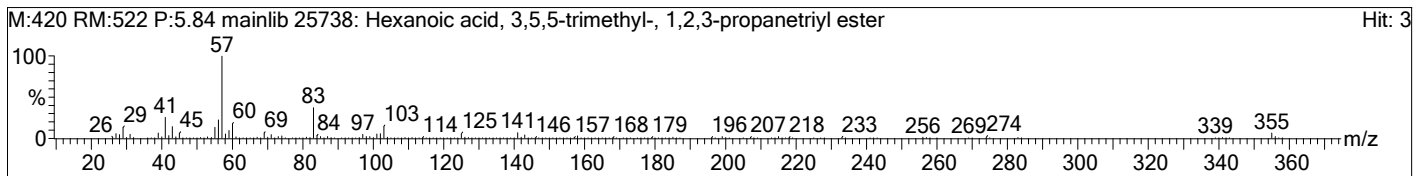

# TAMILNADU AGRICULTURAL UNIVERSITY - AGRICULTURAL MICROBIOLOGY

INSTRUMENT: PERKIN ELMER CLARUS SQ8C  
 INJECTION VOL: 1 MICRO LITER  
 SAMPLE ID : T260

COLOUMN: DB-5 MS CAPILARY STANDARD NON - POLARCOLOUMN  
 DIMENSION: 30Mts, ID: 0.25 mm, FILM: 0.25 IM CARRIER GAS: He

| #  | RT     | Scan | Height     | Area        | Area % | Norm % |
|----|--------|------|------------|-------------|--------|--------|
| 20 | 31.054 | 5609 | 19,840,662 | 1,248,544.1 | 1.070  | 33.85  |

| Pk # | RT     | Hit | Compound Name                                                                                          | Match | R.Match | Prob. | CAS         | Library |
|------|--------|-----|--------------------------------------------------------------------------------------------------------|-------|---------|-------|-------------|---------|
| 20   | 31.054 | 1   | 2-Nonadecanone 2,4-dinitrophenylhydrazine                                                              | 459   | 483     | 30.5  | 28813-61-8  | mainlib |
|      |        | 2   | 1,5-Bis(4-methoxyphenyl)bicyclo[3.2.0]heptane                                                          | 422   | 470     | 7.4   | 157367-56-1 | mainlib |
|      |        | 3   | 2a,6a-Methano-1H-cyclopropa[b]naphthalene-1,1,8,8-tetrachloro-1a,2,3,6,7,7a-hexahydro-                 | 414   | 477     | 5.5   | 102618-60-0 | mainlib |
|      |        | 4   | 18,19-Secoyohimban-19-oic acid, 16,17,20,21-tetradehydro-16-(hydroxymethyl)-, methyl ester, (15á,16E)- | 404   | 462     | 3.9   | 5523-49-9   | mainlib |
|      |        | 5   | Chromone, 5-hydroxy-6,7,8-trimethoxy-2,3-dimethyl-                                                     | 397   | 446     | 3.0   |             | mainlib |
|      |        | 6   | 16-Nitrobicyclo[10.4.0]hexadecan-1-ol-13-one                                                           | 396   | 447     | 2.9   | 79880-69-6  | mainlib |
|      |        | 7   | Fumaric acid, heptadecyl propyl ester                                                                  | 392   | 464     | 2.4   |             | mainlib |
|      |        | 8   | Isocalamendiol                                                                                         | 391   | 512     | 2.3   |             | mainlib |
|      |        | 9   | 9-Octadecenoic acid, 1,2,3-propanetriyl ester, (E,E,E)-                                                | 391   | 417     | 2.3   | 537-39-3    | mainlib |
|      |        | 10  | Eicosanoic acid, 2-(acetyloxy)-1-[(acetyloxy)methyl]ethyl ester                                        | 389   | 565     | 2.2   | 55429-68-0  | mainlib |

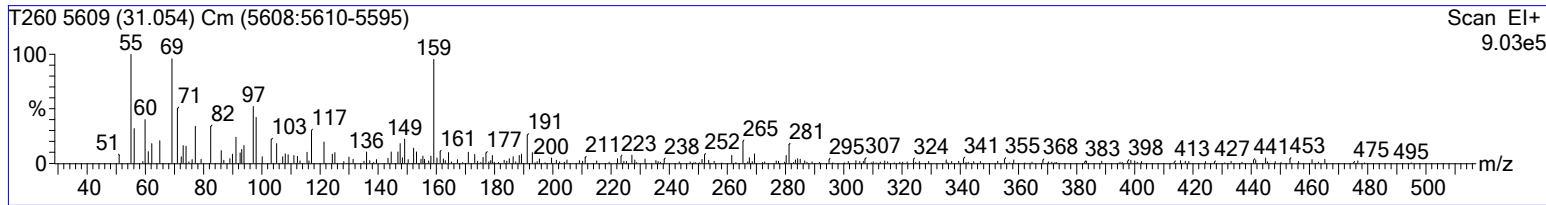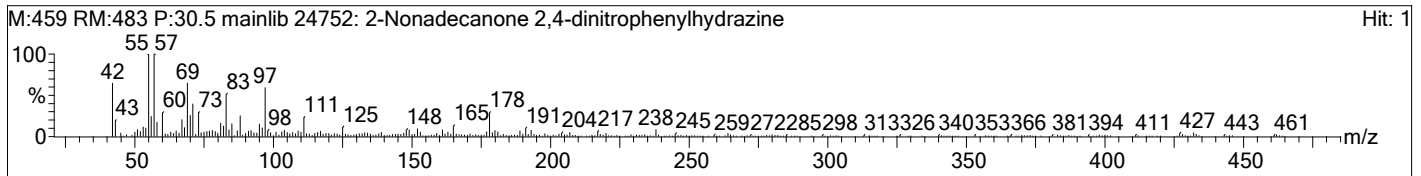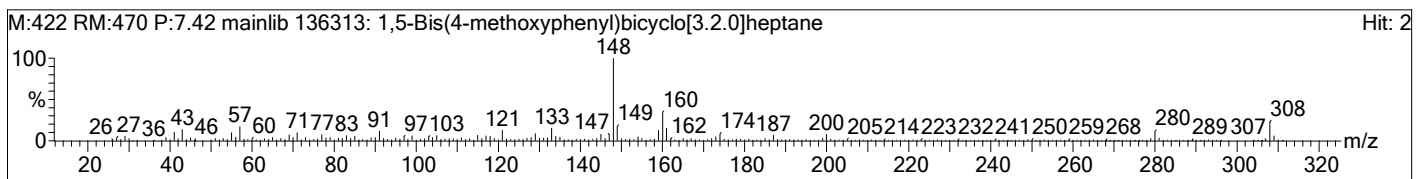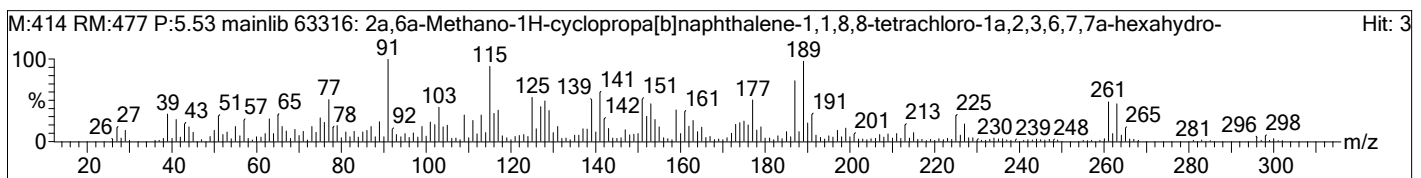

# TAMILNADU AGRICULTURAL UNIVERSITY - AGRICULTURAL MICROBIOLOGY

INSTRUMENT: PERKIN ELMER CLARUS SQ8C  
 INJECTION VOL: 1 MICRO LITER  
 SAMPLE ID : T260

COLOUMN: DB-5 MS CAPILARY STANDARD NON - POLARCOLOUMN  
 DIMENSION: 30Mts, ID: 0.25 mm, FILM: 0.25 IM CARRIER GAS: He

| #  | RT     | Scan | Height     | Area        | Area % | Norm % |
|----|--------|------|------------|-------------|--------|--------|
| 21 | 31.149 | 5628 | 21,113,964 | 1,459,715.2 | 1.251  | 39.57  |

| PK # | RT     | Hit | Compound Name                                                           | Match | R.Match | Prob. | CAS         | Library |
|------|--------|-----|-------------------------------------------------------------------------|-------|---------|-------|-------------|---------|
| 21   | 31.149 | 1   | N,N'-Trimethylenebis[s-3-aminopropylthiosulfuric acid]                  | 456   | 522     | 27.9  | 35871-60-4  | mainlib |
|      |        | 2   | 2-Myristynoyl pantetheine                                               | 435   | 498     | 11.9  |             | mainlib |
|      |        | 3   | 2-[2-(4-Chlorophenyl)-3-morpholin-4-yl-3-thioxo-propenylamino]acetamide | 422   | 466     | 7.7   |             | mainlib |
|      |        | 4   | 1,4,10,13-Tetraoxa-7,16-diazacyclooctadecane, 7,16-bis(1-oxodecyl)-     | 406   | 413     | 4.4   | 105400-04-2 | mainlib |
|      |        | 5   | á,î-Carotene-3,3'-diol, (3R,3'R,6'R)-                                   | 394   | 482     | 2.9   | 127-40-2    | replib  |
|      |        | 6   | Gentamicin a                                                            | 392   | 496     | 2.7   | 13291-74-2  | mainlib |
|      |        | 7   | Spirostan-9-ol, 3-amino-, (3á,5á,25R)-                                  | 386   | 433     | 2.1   | 16577-35-8  | mainlib |
|      |        | 8   | 1-Hexadecanol, 2-methyl-                                                | 382   | 447     | 1.8   | 2490-48-4   | mainlib |
|      |        | 9   | Anthracene, 9-dodecyltetradecahydro-                                    | 375   | 400     | 1.4   | 55401-75-7  | replib  |
|      |        | 10  | Eicosanoic acid, 2-(acetyloxy)-1-[(acetyloxy)methyl]ethyl ester         | 373   | 534     | 1.3   | 55429-68-0  | mainlib |

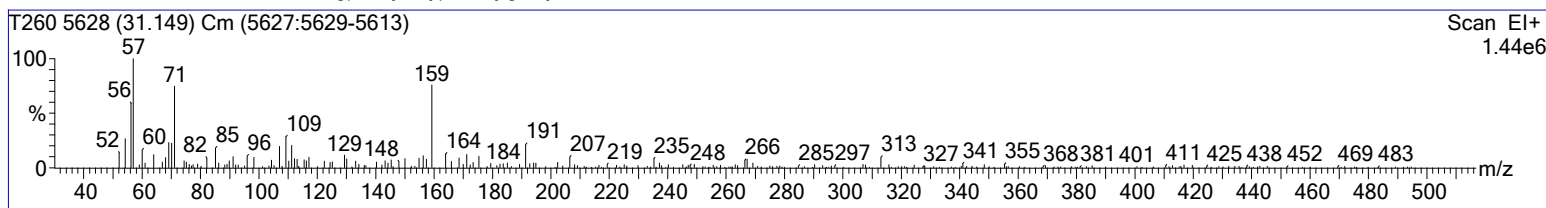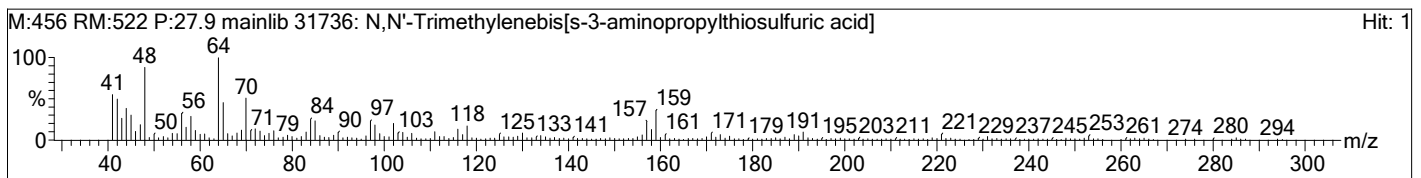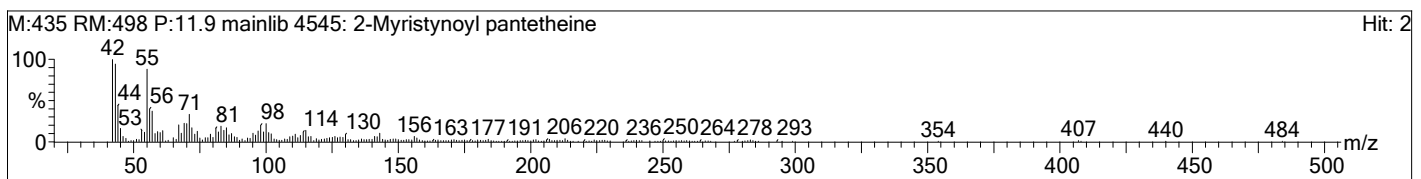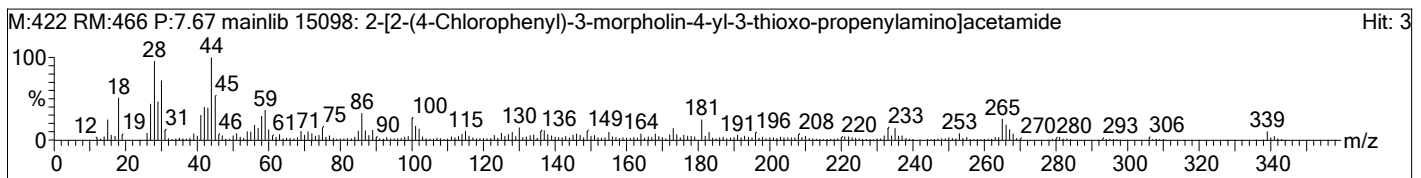

# TAMILNADU AGRICULTURAL UNIVERSITY - AGRICULTURAL MICROBIOLOGY

INSTRUMENT: PERKIN ELMER CLARUS SQ8C  
 INJECTION VOL: 1 MICRO LITER  
 SAMPLE ID : T260

COLOUMN: DB-5 MS CAPILARY STANDARD NON - POLARCOLOUMN  
 DIMENSION: 30Mts, ID: 0.25 mm, FILM: 0.25 IM CARRIER GAS: He

| #  | RT     | Scan | Height     | Area        | Area % | Norm % |
|----|--------|------|------------|-------------|--------|--------|
| 22 | 31.174 | 5633 | 18,674,802 | 1,229,540.4 | 1.053  | 33.33  |

| Pk # | RT     | Hit | Compound Name                                                                                                                       | Match | R.Match | Prob. | CAS        | Library |
|------|--------|-----|-------------------------------------------------------------------------------------------------------------------------------------|-------|---------|-------|------------|---------|
| 22   | 31.174 | 1   | 8,14-Seco-3,19-epoxyandrostane-8,14-dione, 17-acetoxy-3 $\alpha$ -methoxy-4,4-dimethyl-                                             | 487   | 518     | 27.9  |            | mainlib |
|      |        | 2   | 9,12,15-Octadecatrienoic acid, 2-phenyl-1,3-dioxan-5-yl ester                                                                       | 455   | 479     | 7.5   | 56700-76-6 | mainlib |
|      |        | 3   | 9,12-Octadecadienoic acid, (2-phenyl-1,3-dioxolan-4-yl)methyl ester, trans-                                                         | 440   | 455     | 4.5   | 56599-48-5 | mainlib |
|      |        | 4   | 9,12-Octadecadienoic acid, (2-phenyl-1,3-dioxolan-4-yl)methyl ester, cis-                                                           | 437   | 451     | 4.0   | 56599-47-4 | mainlib |
|      |        | 5   | Ursodeoxycholic acid                                                                                                                | 429   | 457     | 3.0   | 128-13-2   | mainlib |
|      |        | 6   | E,E,Z-1,3,12-Nonadecatriene-5,14-diol                                                                                               | 425   | 491     | 2.5   |            | mainlib |
|      |        | 7   | Pregnane-3,11,17,20-tetrol, cyclic 17,20-[(1,1-dimethylethyl)boronate], (3 $\alpha$ ,5 $\alpha$ ,11 $\alpha$ ,20R)-                 | 425   | 476     | 2.5   | 30882-63-4 | mainlib |
|      |        | 8   | 9,12-Octadecadienoic acid, 2-phenyl-1,3-dioxan-5-yl ester, cis-                                                                     | 423   | 437     | 2.3   | 56687-50-4 | mainlib |
|      |        | 9   | 5,14,23-Octadecatrien-14,15-diol                                                                                                    | 421   | 488     | 2.1   |            | mainlib |
|      |        | 10  | 6-(1,5-Dimethyl-hex-4-enyl)-1,6-dihydroxy-1,8a-dimethyl-3-oxo-1,2,3,3a,5a,6,7,8,8a,9,10,10a-dodecahydrodicyclopenta[a,e]cyclooctene | 421   | 451     | 2.1   |            | mainlib |

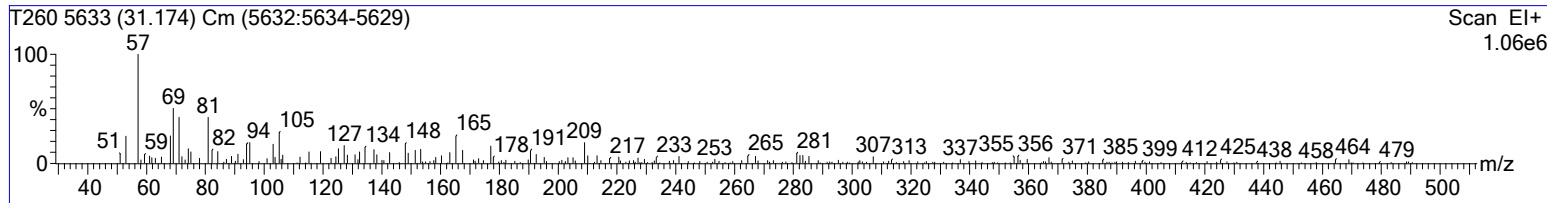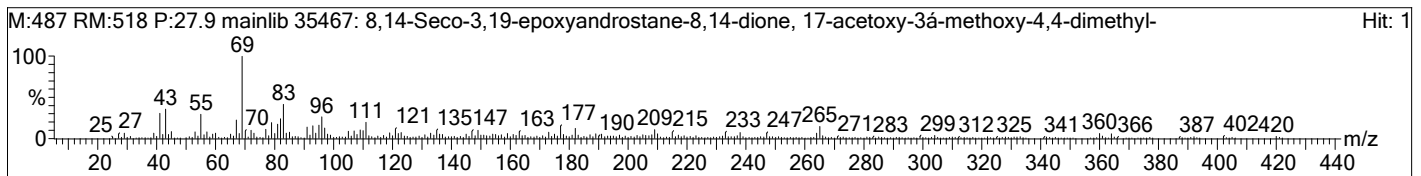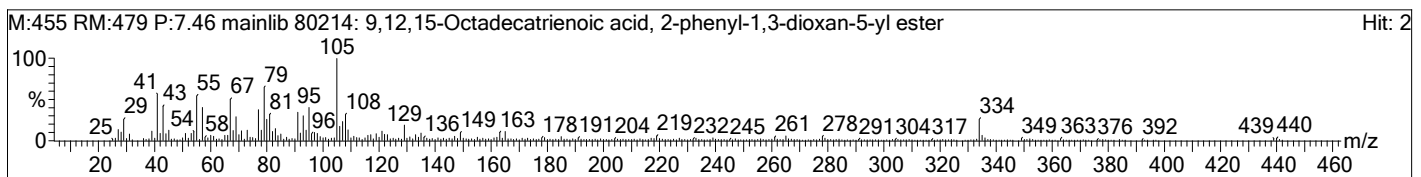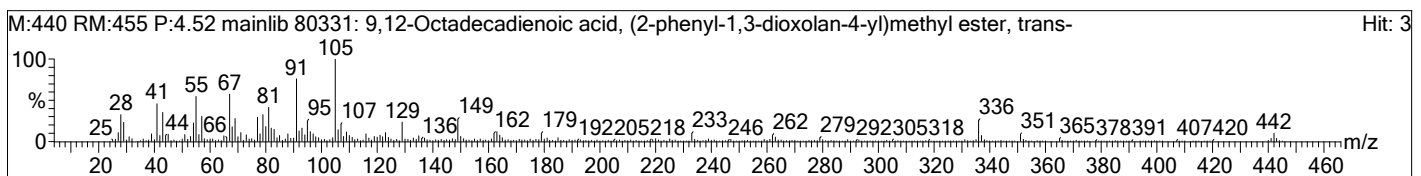

# TAMILNADU AGRICULTURAL UNIVERSITY - AGRICULTURAL MICROBIOLOGY

INSTRUMENT: PERKIN ELMER CLARUS SQ8C  
 INJECTION VOL: 1 MICRO LITER  
 SAMPLE ID : T260

COLOUMN: DB-5 MS CAPILARY STANDARD NON - POLARCOLOUMN  
 DIMENSION: 30Mts, ID: 0.25 mm, FILM: 0.25 IM CARRIER GAS: He

| #  | RT     | Scan | Height     | Area      | Area % | Norm % |
|----|--------|------|------------|-----------|--------|--------|
| 23 | 31.330 | 5664 | 14,161,799 | 976,075.2 | 0.836  | 26.46  |

| Pk # | RT     | Hit | Compound Name                                                                                                                                                                              | Match | R.Match | Prob. | CAS         | Library |
|------|--------|-----|--------------------------------------------------------------------------------------------------------------------------------------------------------------------------------------------|-------|---------|-------|-------------|---------|
| 23   | 31.330 | 1   | 9-Desoxo-9-x-acetoxy-3,8,12-tri-O-acetylingol                                                                                                                                              | 457   | 487     | 13.7  |             | mainlib |
|      |        | 2   | 4a,7a-Epoxy-5H-cyclopenta[a]cyclopropa[f]cycloundecene-2,4,7,10,11-pentol, 1,1a,2,3,4,6,7,10,11,11a-decahydro-1,1,3,6,9-pentamethyl-, 2,7,10,11-tetraacetate                               | 443   | 475     | 8.6   | 51950-35-7  | mainlib |
|      |        | 3   | Corticosterone, bis(O-ethyloxime)                                                                                                                                                          | 442   | 472     | 8.2   |             | mainlib |
|      |        | 4   | 1H-Cyclopropa[3,4]benz[1,2-e]azulene-5,7b,9,9a-tetrol, 3-[(acetyloxy)methyl]-1a,1b,4,4a,5,7a,8,9-octahydro-1,1,6,8-tetramethyl-, 9,9a-diacetate, [1aR-(1aà,1bá,4aà,5á,7aà,7bà,8à,9á,9aà)]- | 442   | 455     | 8.2   | 77550-15-3  | mainlib |
|      |        | 5   | 4,13,20-Tri-O-methylphorbol 12-acetate                                                                                                                                                     | 430   | 453     | 5.5   |             | mainlib |
|      |        | 6   | Acetic acid, 17-acetoxy-4,4,10,13-tetramethyl-7-oxo-2,3,4,7,8,9,10,11,12,13,14,15,16,17-tetradecahydro-1H-cyclopenta[a]phenanthren-3-yl (ester)                                            | 412   | 447     | 2.8   |             | mainlib |
|      |        | 7   | Milbemycin b, 5-O-demethyl-28-deoxy-6,28-epoxy-25-(1-methylethyl)-13-(methylthio)-, (6R,13R,25R)-                                                                                          | 412   | 441     | 2.8   | 104568-10-7 | mainlib |
|      |        | 8   | 2á,4a-Epoxymethylphenanthrene-7-methanol, 1,1-dimethyl-2-methoxy-8-(1,3-dithiin-2-ylidene)methyl-1,2,3,4,4a,4b,5,6,7,8,8a,9-dodecahydro-, acetate                                          | 405   | 413     | 2.2   |             | mainlib |
|      |        | 9   | Voaluteine, 20-hydroxy-, (20S)-                                                                                                                                                            | 404   | 459     | 2.1   | 18646-15-6  | mainlib |
|      |        | 10  | 1,2-Bis[1-(2-hydroxyethyl)-3,6-diazahomoadamantantylene-9]hydrazine                                                                                                                        | 404   | 435     | 2.1   |             | mainlib |

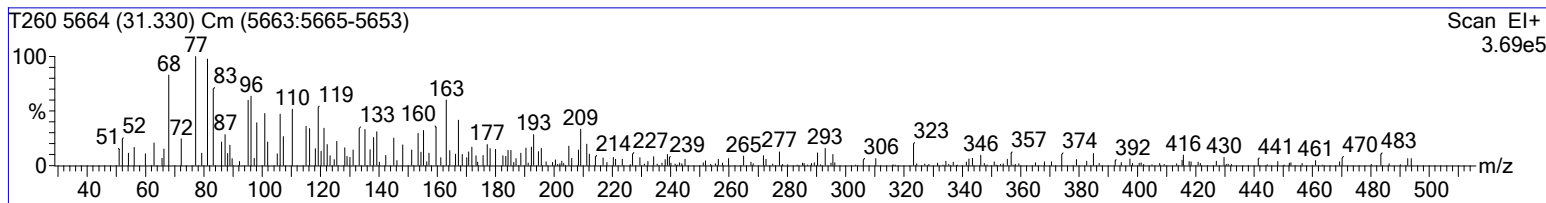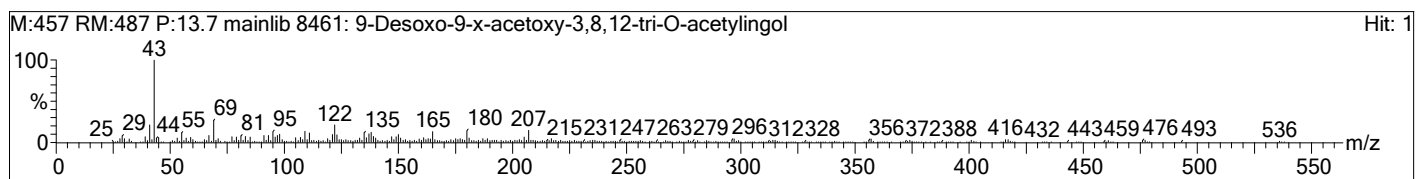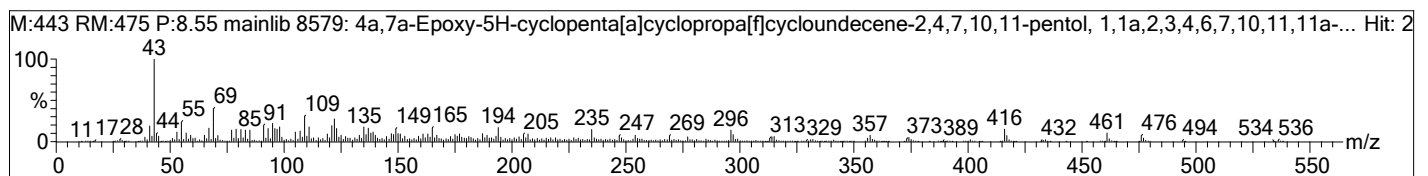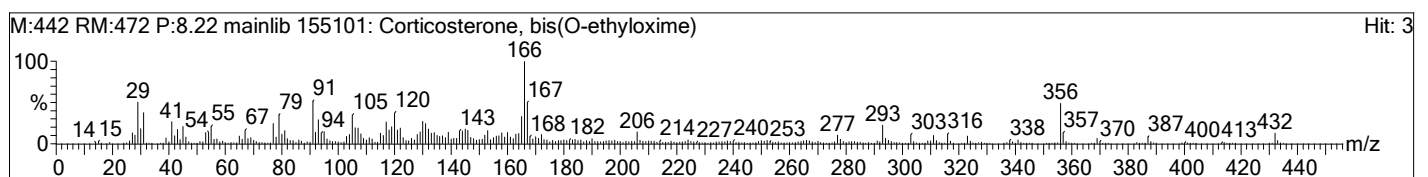

# TAMILNADU AGRICULTURAL UNIVERSITY - AGRICULTURAL MICROBIOLOGY

INSTRUMENT: PERKIN ELMER CLARUS SQ8C  
 INJECTION VOL: 1 MICRO LITER  
 SAMPLE ID : T260

COLOUMN: DB-5 MS CAPILARY STANDARD NON - POLARCOLOUMN  
 DIMENSION: 30Mts, ID: 0.25 mm, FILM: 0.25 IM CARRIER GAS: He

| #  | RT     | Scan | Height     | Area      | Area % | Norm % |
|----|--------|------|------------|-----------|--------|--------|
| 24 | 31.790 | 5756 | 11,670,283 | 847,591.8 | 0.726  | 22.98  |

| PK # | RT     | Hit | Compound Name                                                                                                                                                                                                              | Match | R.Match | Prob. | CAS         | Library |
|------|--------|-----|----------------------------------------------------------------------------------------------------------------------------------------------------------------------------------------------------------------------------|-------|---------|-------|-------------|---------|
| 24   | 31.790 | 1   | Propanoic acid, 2-(3-acetoxy-4,4,14-trimethylandrosta-8-en-17-yl)-                                                                                                                                                         | 422   | 436     | 14.1  |             | mainlib |
|      |        | 2   | Hydrocortisone 21-acetate, bis(O-ethylxime)                                                                                                                                                                                | 417   | 427     | 11.4  |             | mainlib |
|      |        | 3   | 2-Myristinoyl pantetheine                                                                                                                                                                                                  | 401   | 471     | 6.6   |             | mainlib |
|      |        | 4   | 5H-Cyclopropa[3,4]benz[1,2-e]azulen-5-one, 2,4a,9,9a-tetrakis(acetyloxy)-3,[(acetyloxy)methyl]-1,1a,1b,2,3,4,4a,7a,7b,8,9,9a-dodecahydro-2,7b-dihydroxy-1,1,6,8-tetramethyl-, [1aR-(1aà,1bà,2à,3à,4aà,7aà,7bà,8à,9a,9aà)]- | 400   | 409     | 6.3   | 77573-25-2  | mainlib |
|      |        | 5   | Cyclopropa[3',4']benz[1',2':4,5]azuleno[1,8a-d]-1,3-dioxole-5b,7,7a-triol, 3a,5a,6,7,8,8a,8b,11-octahydro-10-(hydroxymethyl)-2,2,4,6,8,8-hexamethyl-, 7,7a-diacetate, [3aS-(3aà,5aà,5bà,6à,7à,7aà,8aà,8bà,11aS*)]-         | 400   | 403     | 6.3   | 77573-38-7  | mainlib |
|      |        | 6   | Spirostan-9-ol, 3-amino-, (3à,5à,25R)-                                                                                                                                                                                     | 391   | 440     | 4.6   | 16577-35-8  | mainlib |
|      |        | 7   | Cholest-4-ene, 3á-(methoxymethoxy)-                                                                                                                                                                                        | 390   | 411     | 4.4   | 4707-85-1   | mainlib |
|      |        | 8   | 3-[3-Bromophenyl]-7-chloro-3,4-dihydro-10-hydroxy-1,9(2H,10H)-acridinedione                                                                                                                                                | 385   | 454     | 3.5   | 144128-92-7 | mainlib |
|      |        | 9   | N-(5-Hydroxy-2-oxo-5-phenyl-1-azabicyclo[4.2.0]oct-3-yl)carbamic acid, benzyl ester                                                                                                                                        | 372   | 421     | 2.3   |             | mainlib |
|      |        | 10  | 2-Oxazolamine, 4,5-dihydro-5-(phenoxyethyl)-N-phenyl-                                                                                                                                                                      | 371   | 447     | 2.2   | 25409-59-0  | mainlib |

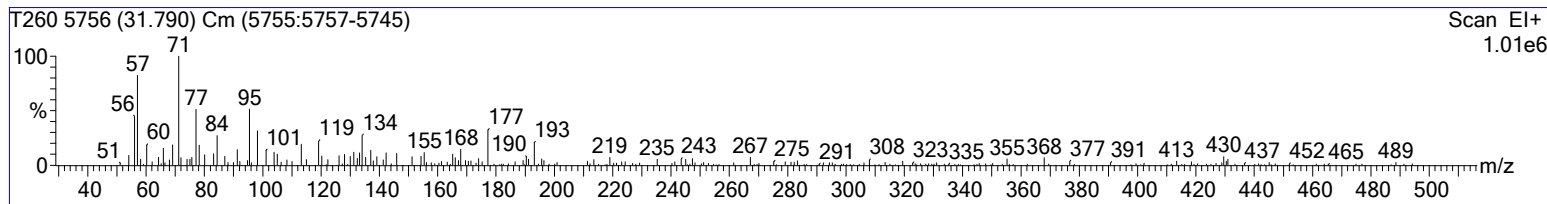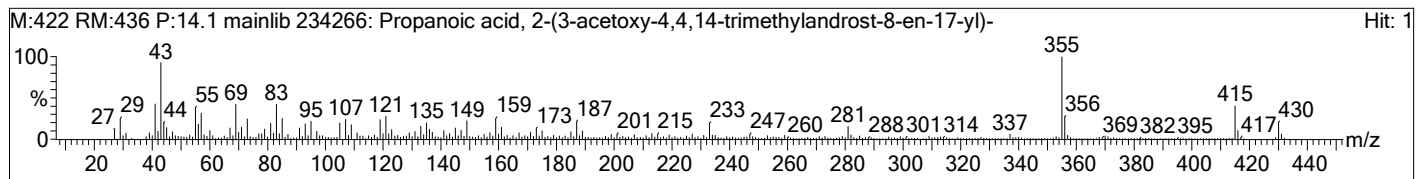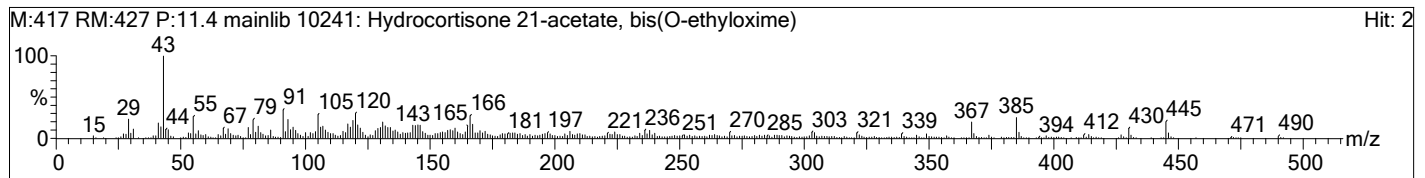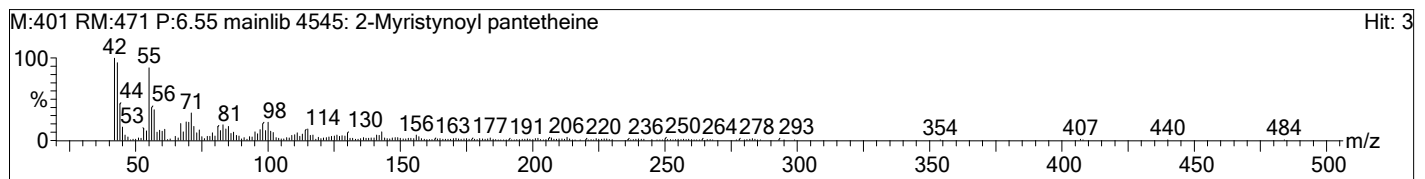



# TAMILNADU AGRICULTURAL UNIVERSITY - AGRICULTURAL MICROBIOLOGY

INSTRUMENT: PERKIN ELMER CLARUS SQ8C  
 INJECTION VOL: 1 MICRO LITER  
 SAMPLE ID : T260

COLOUMN: DB-5 MS CAPILARY STANDARD NON - POLARCOLOUMN  
 DIMENSION: 30Mts, ID: 0.25 mm, FILM: 0.25 IM CARRIER GAS: He

| #  | RT     | Scan | Height     | Area      | Area % | Norm % |
|----|--------|------|------------|-----------|--------|--------|
| 25 | 32.685 | 5935 | 21,193,474 | 943,316.8 | 0.808  | 25.57  |

| Pk # | RT     | Hit | Compound Name                                                                                           | Match | R.Match | Prob. | CAS         | Library   |
|------|--------|-----|---------------------------------------------------------------------------------------------------------|-------|---------|-------|-------------|-----------|
| 25   | 32.685 | 1   | 10,13-Octadecadiynoic acid, methyl ester                                                                | 423   | 477     | 8.6   | 18202-24-9  | mainlib   |
|      |        | 2   | 4,11-Dispiro(2'-cyclobutanone)tricyclo[6.2.2.0(2,7)]dodeca-5,9-diene, 1,3,3,5,12,12-hexamethyl-         | 419   | 465     | 7.2   |             | mainlib   |
|      |        | 3   | Androst-5-en-3-ol-17-one, 16,16-trimethylenedithio-                                                     | 414   | 478     | 5.8   |             | mainlib   |
|      |        | 4   | 17a-Methyl-3á-methoxy-17a-aza-D-homoandrost-5-ene-17-one                                                | 409   | 474     | 4.7   | 149942-10-9 | mainlib   |
|      |        | 5   | Calcitriol                                                                                              | 404   | 489     | 3.8   | 32222-06-3  | mainlib   |
|      |        | 6   | Spiro[(tricyclo[6.2.2.0(2,7)]dodeca-5,9-diene)-4,1'-cyclobutane]-11,2'-dione, 1,3,3,5,12,12-hexamethyl- | 402   | 476     | 3.5   |             | mainlib   |
|      |        | 7   | Mifepristone                                                                                            | 397   | 505     | 2.8   | 84371-65-3  | nist_msms |
|      |        | 8   | Benzoic acid, 3,5-dimethyl-, (3,5-dimethylphenyl)methyl ester                                           | 393   | 475     | 2.4   | 55000-47-0  | mainlib   |
|      |        | 9   | Ethane, 1,2-bis(2-methyl-5-nitrophenyl)-                                                                | 393   | 450     | 2.4   |             | mainlib   |
|      |        | 10  | Doconexent, TBDMS derivative                                                                            | 392   | 432     | 2.3   |             | mainlib   |

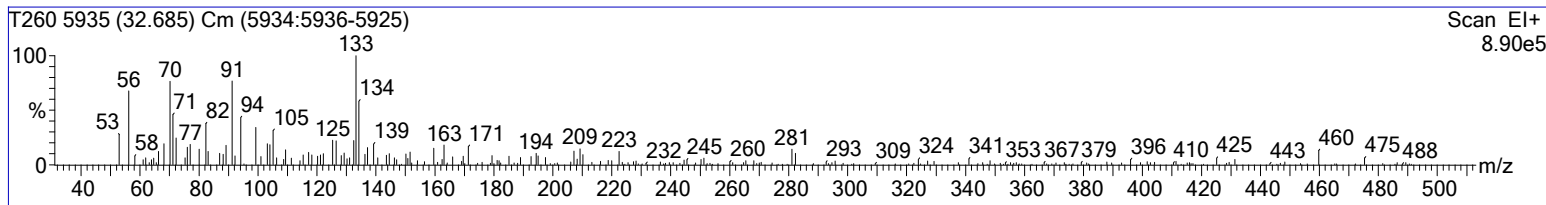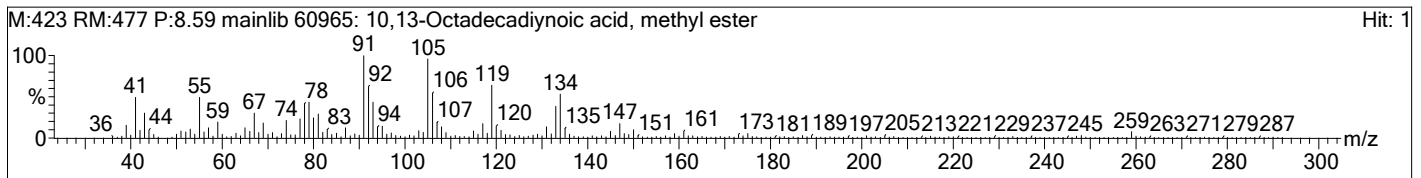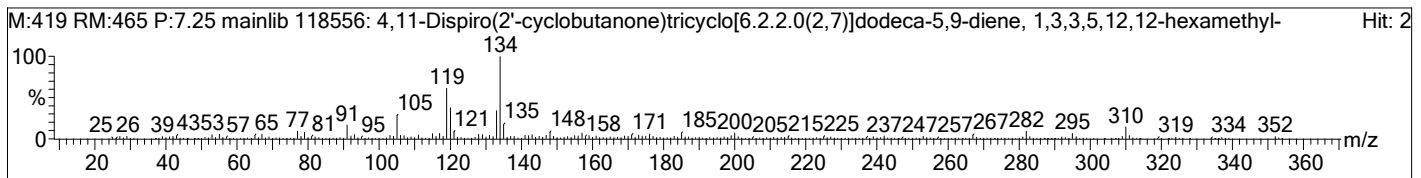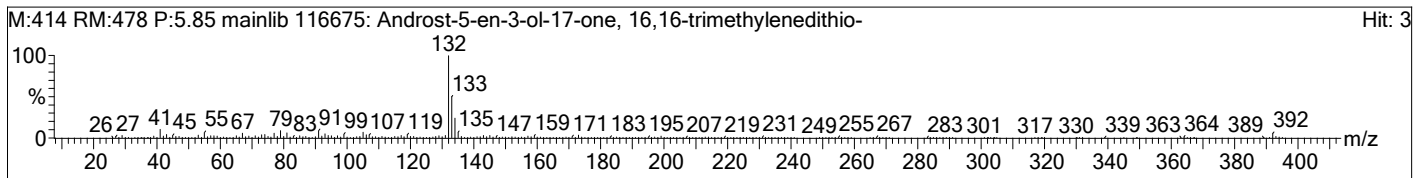

# TAMILNADU AGRICULTURAL UNIVERSITY - AGRICULTURAL MICROBIOLOGY

INSTRUMENT: PERKIN ELMER CLARUS SQ8C  
 INJECTION VOL: 1 MICRO LITER  
 SAMPLE ID : T260

COLOUMN: DB-5 MS CAPILARY STANDARD NON - POLARCOLOUMN  
 DIMENSION: 30Mts, ID: 0.25 mm, FILM: 0.25 IM CARRIER GAS: He

| #  | RT     | Scan | Height     | Area        | Area % | Norm % |
|----|--------|------|------------|-------------|--------|--------|
| 26 | 32.780 | 5954 | 21,464,390 | 1,914,271.1 | 1.640  | 51.89  |

| Pk # | RT     | Hit | Compound Name                                                                            | Match | R.Match | Prob. | CAS         | Library   |
|------|--------|-----|------------------------------------------------------------------------------------------|-------|---------|-------|-------------|-----------|
| 26   | 32.780 | 1   | Lycopene                                                                                 | 397   | 398     | 10.7  | 502-65-8    | replib    |
|      |        | 2   | Cholestan-3-ol, 5-chloro-6-nitro-, (3á,5à,6á)-                                           | 392   | 402     | 8.6   | 15505-91-6  | replib    |
|      |        | 3   | Pregn-5-en-20-one, 12-(acetyloxy)-3,8,14-trihydroxy-, (3á,12á,14á)-                      | 386   | 434     | 6.8   | 55955-56-1  | mainlib   |
|      |        | 4   | Cholestan-3-ol, 5-chloro-6-nitro-, (3á,5à,6á)-                                           | 383   | 396     | 8.6   | 15505-91-6  | mainlib   |
|      |        | 5   | Spiro-6-(bicyclo[3.2.1]octane)-2'-(oxirane), 7,8-di(hydroxymethyl)-5-methyl-2-isopropyl- | 382   | 465     | 5.7   |             | mainlib   |
|      |        | 6   | Cholestan-3-ol, 5-chloro-6-nitro-, acetate (ester), (3á,5à,6á)-                          | 381   | 388     | 5.5   | 1431-22-7   | mainlib   |
|      |        | 7   | Cholestan-3-ol, 5-chloro-6-nitro-, acetate (ester), (3á,5à,6á)-                          | 372   | 381     | 5.5   | 1431-22-7   | replib    |
|      |        | 8   | Spironolactone                                                                           | 371   | 446     | 3.9   | 52-01-7     | nist_msms |
|      |        | 9   | 5Z,?8Z,?11Z,?14Z-Eicosatetraenoic acid,? 3-?theinylmethyl ester                          | 366   | 427     | 3.1   | 390824-17-6 | mainlib   |
|      |        | 10  | Androstan-3-one, 17-methoxy-, 3-methoxime, (5à,17á)-                                     | 365   | 419     | 3.0   |             | mainlib   |

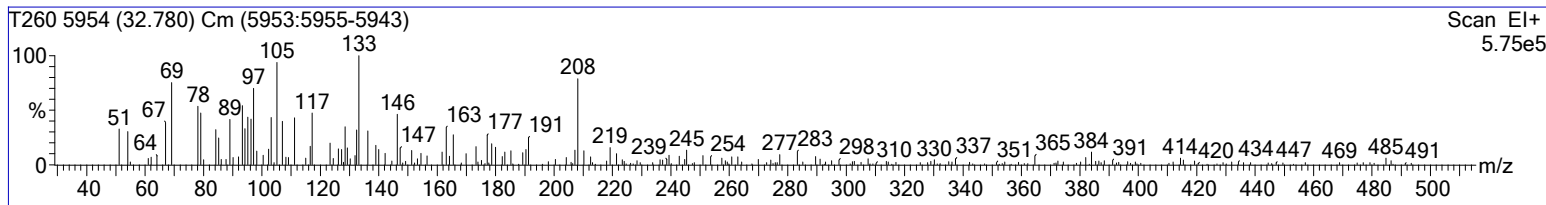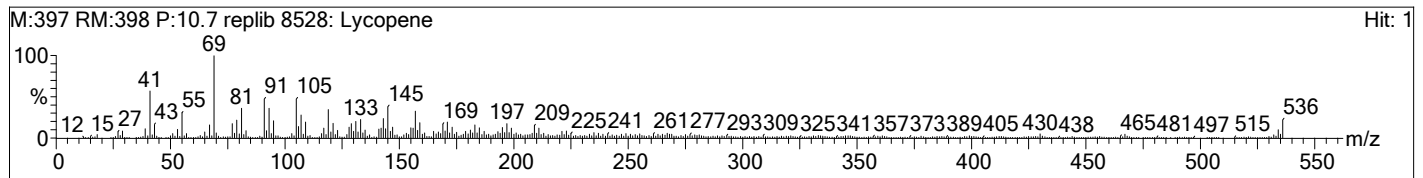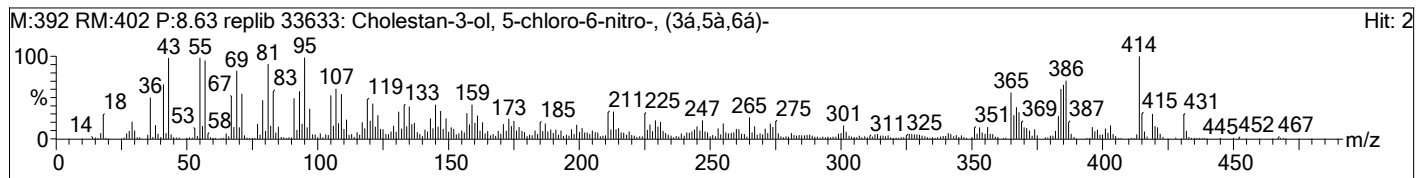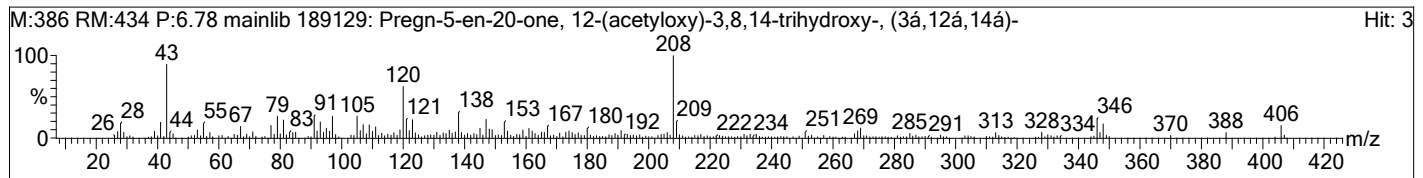

# TAMILNADU AGRICULTURAL UNIVERSITY - AGRICULTURAL MICROBIOLOGY

INSTRUMENT: PERKIN ELMER CLARUS SQ8C  
 INJECTION VOL: 1 MICRO LITER  
 SAMPLE ID : T260

COLOUMN: DB-5 MS CAPILARY STANDARD NON - POLARCOLOUMN  
 DIMENSION: 30Mts, ID: 0.25 mm, FILM: 0.25 IM CARRIER GAS: He

| #  | RT     | Scan | Height     | Area        | Area % | Norm % |
|----|--------|------|------------|-------------|--------|--------|
| 27 | 32.845 | 5967 | 18,290,328 | 1,214,588.5 | 1.041  | 32.93  |

| Pk # | RT     | Hit | Compound Name                                                                                         | Match | R.Match | Prob. | CAS         | Library   |
|------|--------|-----|-------------------------------------------------------------------------------------------------------|-------|---------|-------|-------------|-----------|
| 27   | 32.845 | 1   | Olean-12-ene-3,16,21,22,28-pentol, (3á,16à,21á,22à)-                                                  | 415   | 501     | 17.8  | 13844-01-4  | mainlib   |
|      |        | 2   | Testolactone                                                                                          | 395   | 455     | 8.1   | 968-93-4    | mainlib   |
|      |        | 3   | Salinomycin                                                                                           | 390   | 490     | 6.6   | 53003-10-4  | nist_msms |
|      |        | 4   | 3-Hydroxy-2,5,5,8a-tetramethyl-3,4,4a,5,6,7,8,8a-octahydronaphthalene-1-carboxylic acid, methyl ester | 390   | 472     | 6.6   |             | mainlib   |
|      |        | 5   | Testolactone                                                                                          | 390   | 465     | 8.1   | 968-93-4    | replib    |
|      |        | 6   | 7-Oxabicyclo[2.2.1]heptane, 2,5-diethoxy-1,4-bis(trifluoromethyl)-                                    | 389   | 521     | 6.3   | 128097-71-2 | mainlib   |
|      |        | 7   | Cyclododecanone, 4-(12-bromo-1-oxododecyl)-                                                           | 383   | 436     | 4.9   |             | mainlib   |
|      |        | 8   | Salinomycin                                                                                           | 371   | 493     | 6.6   | 53003-10-4  | nist_msms |
|      |        | 9   | 1-Cyclohexene-1-acrylic acid, 2,6,6-trimethyl-3-oxo-, methyl ester                                    | 371   | 456     | 3.3   | 28043-03-0  | mainlib   |
|      |        | 10  | 8-(2,5-Dimethoxyphenyl)-6-methyl-2-(4-methylpent-3-enyl)octa-2,6-dienoic acid, ethyl ester            | 368   | 407     | 2.9   |             | mainlib   |

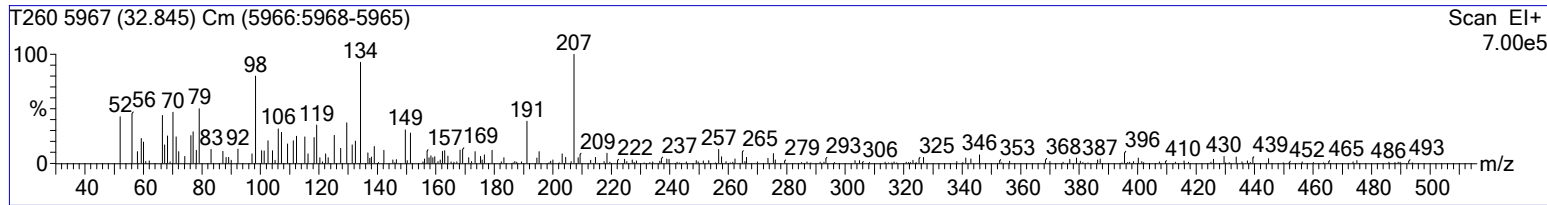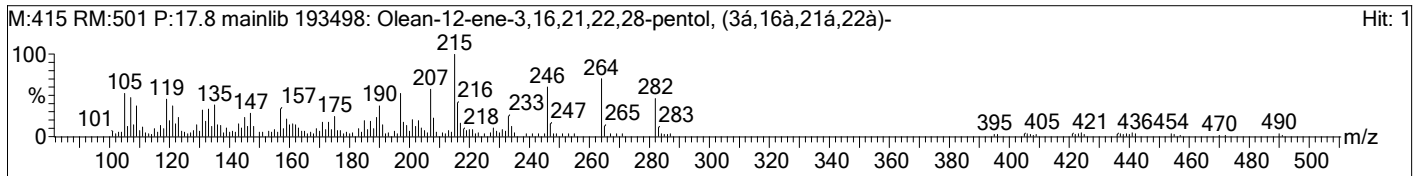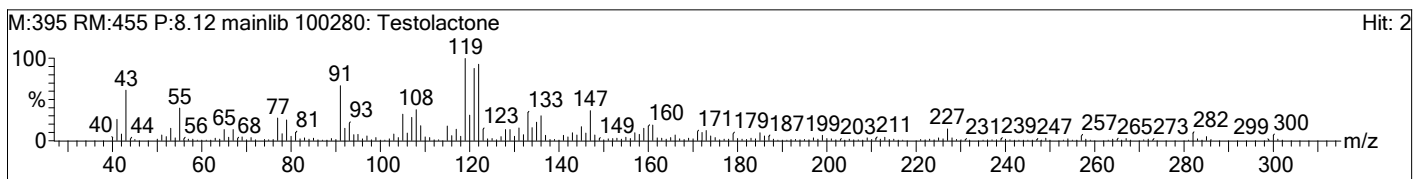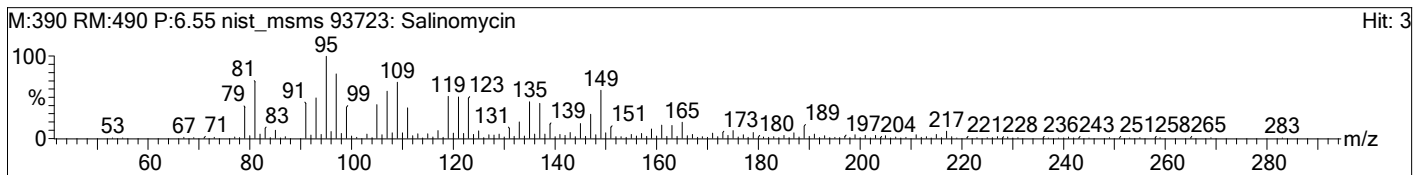

# TAMILNADU AGRICULTURAL UNIVERSITY - AGRICULTURAL MICROBIOLOGY

INSTRUMENT: PERKIN ELMER CLARUS SQ8C  
 INJECTION VOL: 1 MICRO LITER  
 SAMPLE ID : T260

COLOUMN: DB-5 MS CAPILARY STANDARD NON - POLARCOLOUMN  
 DIMENSION: 30Mts, ID: 0.25 mm, FILM: 0.25 IM CARRIER GAS: He

| #  | RT     | Scan | Height     | Area      | Area % | Norm % |
|----|--------|------|------------|-----------|--------|--------|
| 28 | 34.456 | 6289 | 15,484,870 | 857,798.4 | 0.735  | 23.25  |

| Pk # | RT     | Hit | Compound Name                                                                                                                                                                                              | Match | R.Match | Prob. | CAS        | Library |
|------|--------|-----|------------------------------------------------------------------------------------------------------------------------------------------------------------------------------------------------------------|-------|---------|-------|------------|---------|
| 28   | 34.456 | 1   | Ethyl iso-allocholate                                                                                                                                                                                      | 484   | 507     | 33.2  |            | mainlib |
|      |        | 2   | 4-Piperidineacetic acid, 1-acetyl-5-ethyl-2-[3-(2-hydroxyethyl)-1H-indol-2-yl]-à-methyl-, methyl ester                                                                                                     | 456   | 486     | 9.6   | 55724-47-5 | mainlib |
|      |        | 3   | Demecolcine                                                                                                                                                                                                | 455   | 493     | 9.2   | 477-30-5   | mainlib |
|      |        | 4   | 1H-2,8a-Methanocyclopenta[a]cyclopropa[e]cyclodecen-11-one, 5,6-bis(acetyloxy)-4-[(acetyloxy)methyl]-1a,2,5,5a,6,9,10,10a-octahydro-5a-hydroxy-1,1,7,9-tetramethyl-, [1aR-(1aà,2à,5á,5aá,6á,8aà,9à,10aà)]- | 445   | 459     | 6.5   | 30220-45-2 | mainlib |
|      |        | 5   | Card-20(22)-enolide, 3-[(6-deoxy-3,4-O-methylenehexopyranos-2-ulos-1-yl)oxy]-5,11,14-trihydroxy-12-oxo-, (3á,5à,11à)-                                                                                      | 431   | 446     | 4.1   | 29428-86-2 | mainlib |
|      |        | 6   | 2,4a-Oxymethano-1,2,3,4,4a,4b,5,6,7,8,8a,9-dodecahydrophenanthren-9-one, 8-cyanomethyl-2-methoxy-7-methoxycarbonyl-1,1,7-trimethyl-                                                                        | 421   | 439     | 2.9   |            | mainlib |
|      |        | 7   | Demecolcine                                                                                                                                                                                                | 419   | 508     | 9.2   | 477-30-5   | replib  |
|      |        | 8   | lbogamine-18-carboxylic acid, 16,17-didehydro-9,17-dihydro-9,20-dihydroxy-12-methoxy-, methyl ester, (20S)-                                                                                                | 413   | 466     | 2.1   | 15215-86-8 | mainlib |
|      |        | 9   | Allopregnane-7à,11à-diol-3,20-dione                                                                                                                                                                        | 412   | 489     | 2.1   |            | mainlib |
|      |        | 10  | 17-(2-Hydroxy-1,5-dimethyl-hex-4-enyl)-4,4,10,13,14-pentamethyl-2,3,4,5,6,7,10,11,12,13,14,15,16,17-tetradecahydro-1H-cyclopenta[a]phenanthrene                                                            | 411   | 442     | 2.0   |            | mainlib |

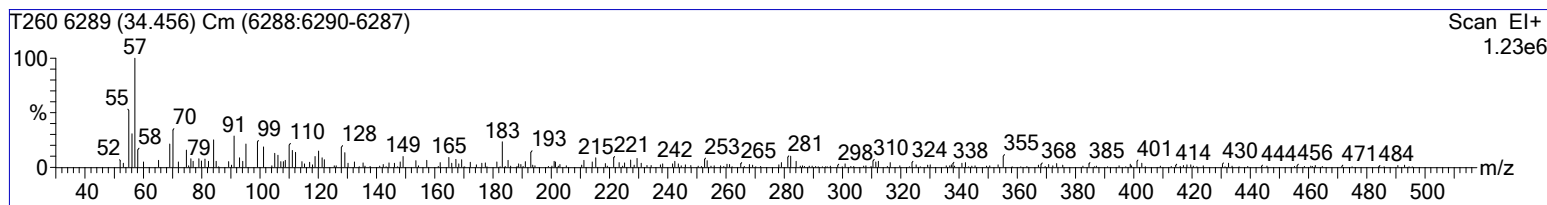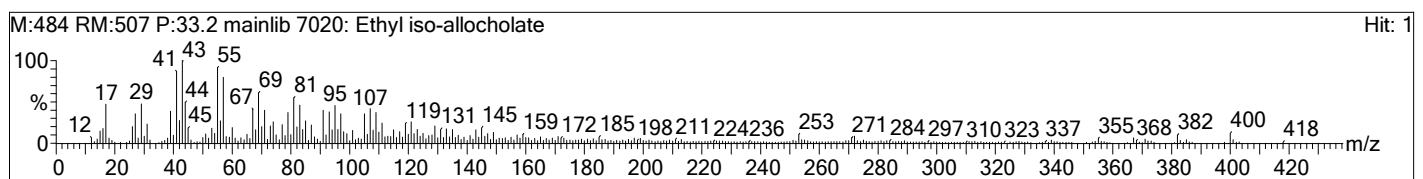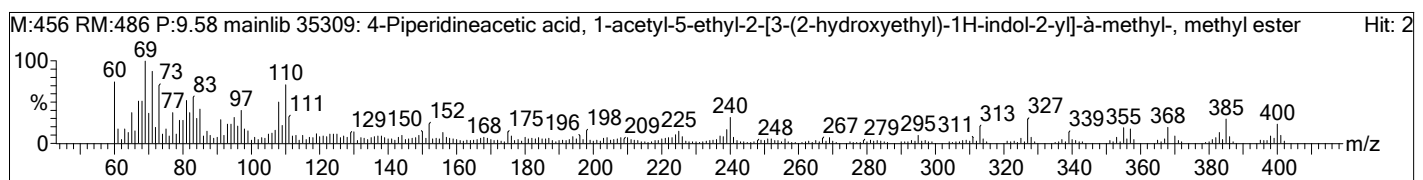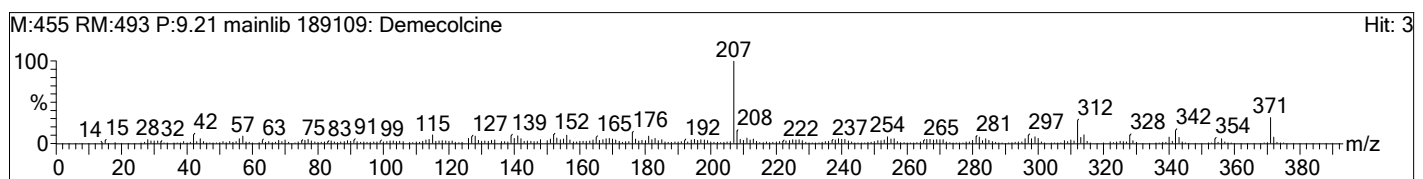

# TAMILNADU AGRICULTURAL UNIVERSITY - AGRICULTURAL MICROBIOLOGY

INSTRUMENT: PERKIN ELMER CLARUS SQ8C  
 INJECTION VOL: 1 MICRO LITER  
 SAMPLE ID : T260

COLOUMN: DB-5 MS CAPILARY STANDARD NON - POLARCOLOUMN  
 DIMENSION: 30Mts, ID: 0.25 mm, FILM: 0.25 IM CARRIER GAS: He

| #  | RT     | Scan | Height     | Area      | Area % | Norm % |
|----|--------|------|------------|-----------|--------|--------|
| 29 | 34.526 | 6303 | 15,164,177 | 826,650.9 | 0.708  | 22.41  |

| PK # | RT     | Hit | Compound Name                                                                                                   | Match | R.Match | Prob. | CAS        | Library |
|------|--------|-----|-----------------------------------------------------------------------------------------------------------------|-------|---------|-------|------------|---------|
| 29   | 34.526 | 1   | Strychane, 1-acetyl-20-hydroxy-16-methylene-                                                                    | 439   | 499     | 11.0  | 2111-98-0  | mainlib |
|      |        | 2   | Dasycarpidan-1-methanol, acetate (ester)                                                                        | 438   | 494     | 10.5  | 55724-48-6 | mainlib |
|      |        | 3   | Spirost-8-en-11-one, 3-hydroxy-, (3 $\alpha$ ,5 $\alpha$ ,14 $\alpha$ ,20 $\alpha$ ,22 $\alpha$ ,25R)-          | 424   | 473     | 6.6   | 58072-54-1 | mainlib |
|      |        | 4   | 4-Piperidineacetic acid, 1-acetyl-5-ethyl-2-[3-(2-hydroxyethyl)-1H-indol-2-yl]- $\alpha$ -methyl-, methyl ester | 423   | 448     | 6.3   | 55724-47-5 | mainlib |
|      |        | 5   | Octadecane, 3-ethyl-5-(2-ethylbutyl)-                                                                           | 420   | 469     | 5.6   | 55282-12-7 | replib  |
|      |        | 6   | Pyrrolidine, 1-(1-oxo-2,5-octadecadienyl)-                                                                      | 417   | 548     | 4.9   | 56666-48-9 | mainlib |
|      |        | 7   | $\alpha$ -Hydroxyquebrachamine                                                                                  | 417   | 465     | 4.9   |            | mainlib |
|      |        | 8   | Octadecane, 1,1'-[1,3-propanediylbis(oxy)]bis-                                                                  | 415   | 429     | 4.6   | 17367-38-3 | mainlib |
|      |        | 9   | Phorbol 12,13-dihexanoate                                                                                       | 407   | 421     | 3.4   | 37558-17-1 | mainlib |
|      |        | 10  | Cholest-1-eno[2,1-a]naphthalene, 3',4'-dihydro-                                                                 | 404   | 419     | 3.0   |            | mainlib |

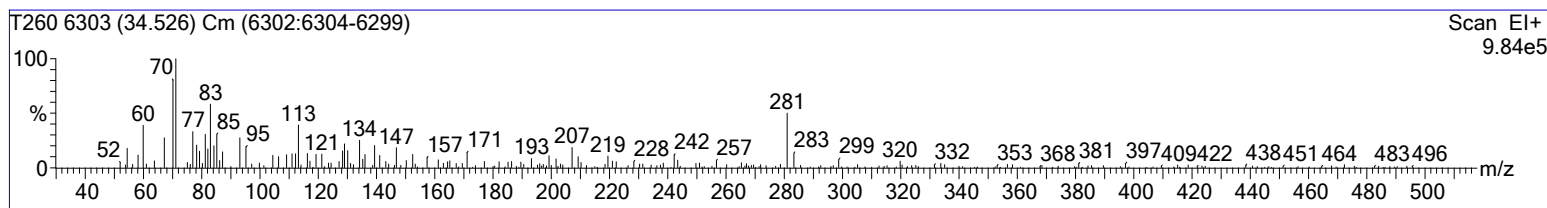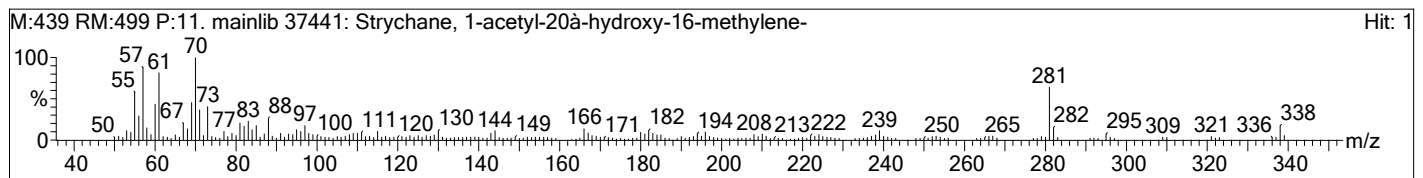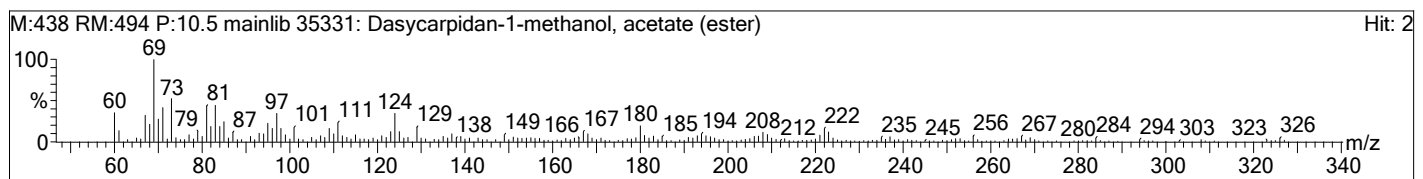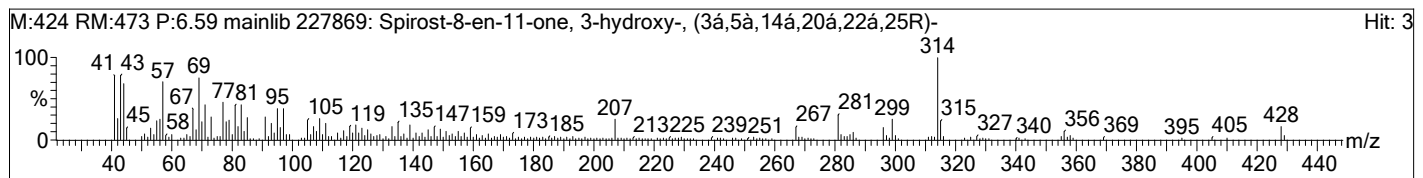

# TAMILNADU AGRICULTURAL UNIVERSITY - AGRICULTURAL MICROBIOLOGY

INSTRUMENT: PERKIN ELMER CLARUS SQ8C  
 INJECTION VOL: 1 MICRO LITER  
 SAMPLE ID : T260

COLOUMN: DB-5 MS CAPILARY STANDARD NON - POLARCOLOUMN  
 DIMENSION: 30Mts, ID: 0.25 mm, FILM: 0.25 IM CARRIER GAS: He

| #  | RT     | Scan | Height     | Area      | Area % | Norm % |
|----|--------|------|------------|-----------|--------|--------|
| 30 | 34.636 | 6325 | 14,621,751 | 793,083.9 | 0.680  | 21.50  |

| Pk # | RT     | Hit | Compound Name                                                                       | Match | R.Match | Prob. | CAS        | Library |
|------|--------|-----|-------------------------------------------------------------------------------------|-------|---------|-------|------------|---------|
| 30   | 34.636 | 1   | 9à-Fluoro-17à-methyl-5à-Androstan-3á,11á,17á-triol                                  | 426   | 494     | 14.6  |            | mainlib |
|      |        | 2   | 9-Octadecenoic acid (Z)-, 2,3-dihydroxypropyl ester                                 | 424   | 460     | 13.5  | 111-03-5   | mainlib |
|      |        | 3   | Norgestrel                                                                          | 412   | 482     | 9.0   | 6533-00-2  | replib  |
|      |        | 4   | Elaidic acid, isopropyl ester                                                       | 404   | 501     | 6.7   | 22147-34-8 | mainlib |
|      |        | 5   | 11-Acetamidooctadecanoic acid                                                       | 390   | 425     | 4.2   | 80509-30-4 | mainlib |
|      |        | 6   | 1,4-Dioxo-7,14-diazacyclohexadecane-6,15-dione,<br>7,14-dihexyl-                    | 390   | 410     | 4.2   | 67456-24-0 | mainlib |
|      |        | 7   | Norgestrel                                                                          | 387   | 484     | 9.0   | 6533-00-2  | replib  |
|      |        | 8   | Norgestrel                                                                          | 387   | 483     | 9.0   | 6533-00-2  | replib  |
|      |        | 9   | 2-Tridecyl-5-(acetylamino)tetrahydro-ç-pyrone                                       | 385   | 455     | 3.4   | 57633-80-4 | mainlib |
|      |        | 10  | (14á)3,19-Epoxyandrosta-5,7-diene, 4,4-dimethyl-<br>3-methoxy-17-methylthiomethoxy- | 383   | 408     | 3.1   |            | mainlib |

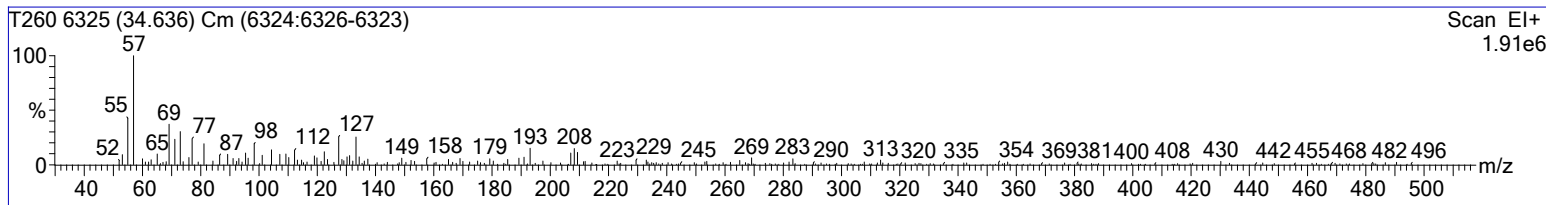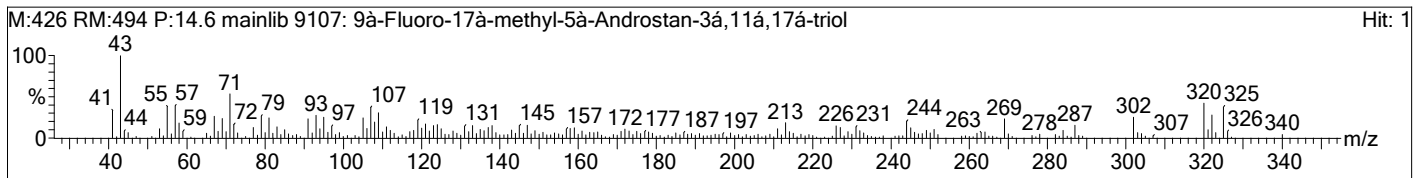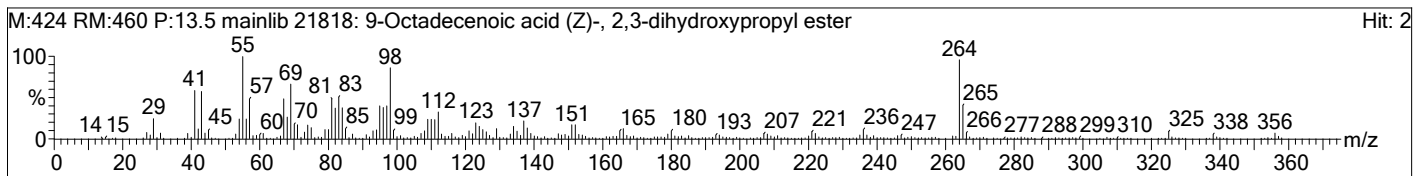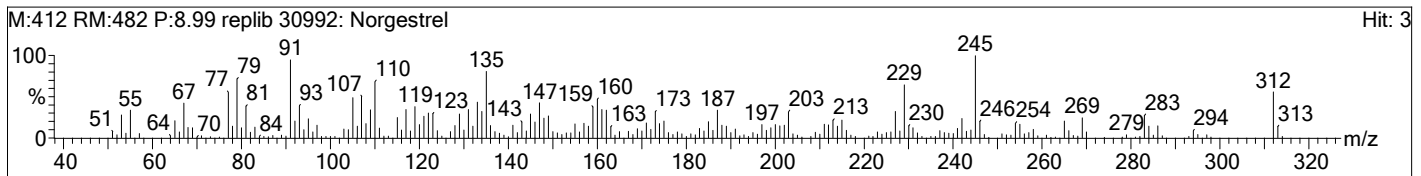

Supplement: pone.0219014.s010.pdf [file pone.0219014.s010.pdf]
