# Supplementary material for: Enhancement of disease resistance, growth potential, and photosynthesis in tomato (Solanum lycopersicum) by inoculation with an endophytic actinobacterium, Streptomyces thermocarboxydus strain BPSAC147
Source: PubMed Central journal article supplement (PMC6608948; doi:10.1371/journal.pone.0219014), 2019-07-03

# TAMILNADU AGRICULTURAL UNIVERSITY - AGRICULTURAL MICROBIOLOGY

INSTRUMENT: PERKIN ELMER CLARUS SQ8C  
 INJECTION VOL: 1 MICRO LITER  
 SAMPLE ID : T360

COLOUMN: DB-5 MS CAPILARY STANDARD NON - POLARCOLOUMN  
 DIMENSION: 30Mts, ID: 0.25 mm, FILM: 0.25 IM CARRIER GAS: He

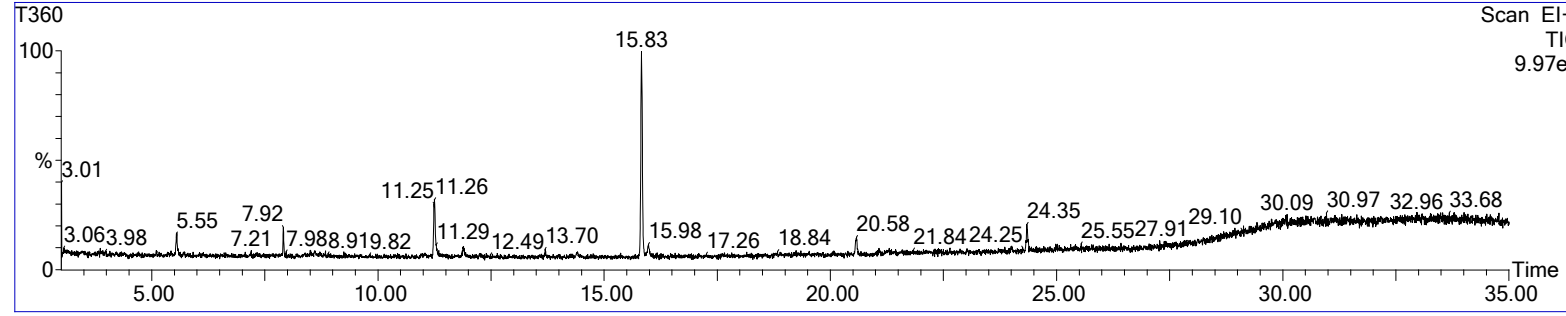

| # | RT    | Scan | Height    | Area      | Area % | Norm % |
|---|-------|------|-----------|-----------|--------|--------|
| 1 | 3.063 | 13   | 4,308,520 | 166,280.5 | 0.345  | 4.31   |

| PK # | RT    | Hit | Compound Name                                                                                 | Match | R.Match | Prob. | CAS         | Library   |
|------|-------|-----|-----------------------------------------------------------------------------------------------|-------|---------|-------|-------------|-----------|
| 1    | 3.063 | 1   | 2-Myristynoyl pantetheine                                                                     | 439   | 502     | 9.2   |             | mainlib   |
| 2    |       |     | 1,8-Di(4-nitrophenylmethyl)-3,6-diazahomoadamantan-9-one                                      | 418   | 563     | 3.9   |             | mainlib   |
| 3    |       |     | Propoxyphene                                                                                  | 417   | 516     | 3.8   | 469-62-5    | replib    |
| 4    |       |     | 2-t-Butyl-5-methyl-10H-acridin-9-one                                                          | 416   | 475     | 3.6   |             | mainlib   |
| 5    |       |     | 3,4-Dimethoxycinnamic acid                                                                    | 408   | 552     | 2.7   | 2316-26-9   | replib    |
| 6    |       |     | Ni(ii)-2,7-bis[2-hydroxy-5,5-dimethyl-4,5-dihydro-1H-pyrrol-4-on-3-yl]-3,6-diazaocta-2,6-dien | 408   | 454     | 2.7   |             | mainlib   |
| 7    |       |     | Thiocyanic acid                                                                               | 407   | 792     | 2.6   | 463-56-9    | nist_msms |
| 8    |       |     | 9-Oximino-2,7-diethoxyfluorene                                                                | 407   | 532     | 2.6   | 327041-58-7 | mainlib   |
| 9    |       |     | Propoxyphene                                                                                  | 406   | 505     | 3.8   | 469-62-5    | replib    |
| 10   |       |     | 2-Propenoic acid, 3-(3,4-dimethoxyphenyl)-, (E)-                                              | 403   | 501     | 2.2   | 14737-89-4  | mainlib   |

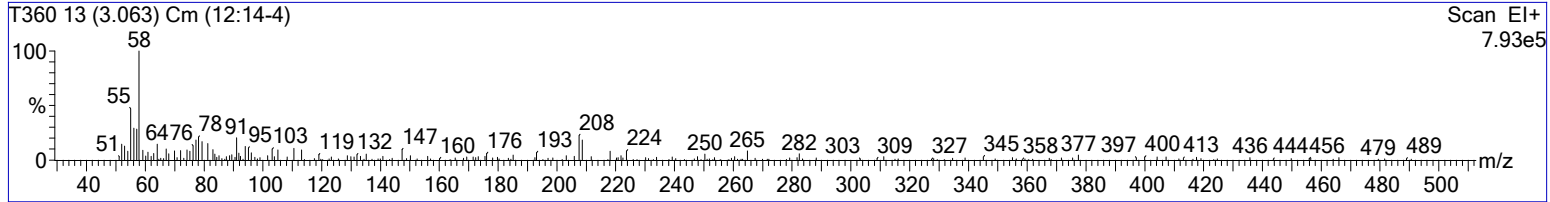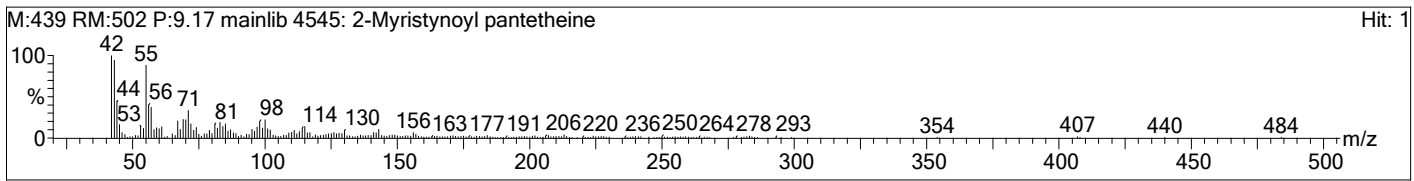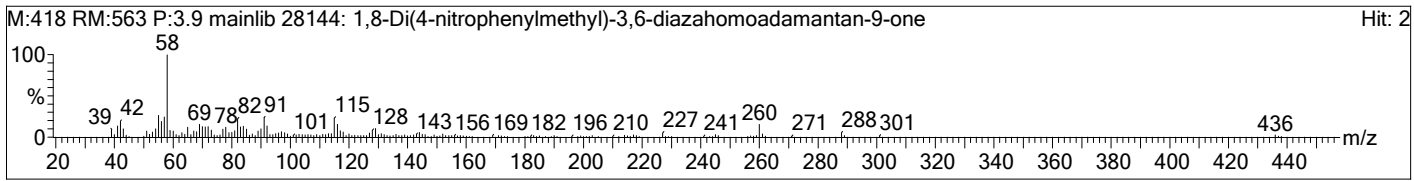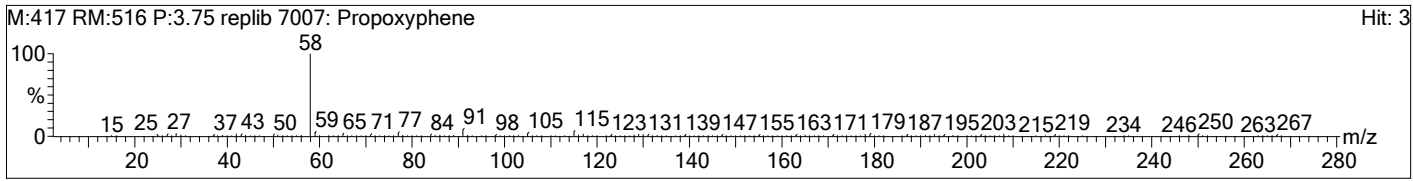

# TAMILNADU AGRICULTURAL UNIVERSITY - AGRICULTURAL MICROBIOLOGY

INSTRUMENT: PERKIN ELMER CLARUS SQ8C  
 INJECTION VOL: 1 MICRO LITER  
 SAMPLE ID : T360

COLOUMN: DB-5 MS CAPILARY STANDARD NON - POLARCOLOUMN  
 DIMENSION: 30Mts, ID: 0.25 mm, FILM: 0.25 IM CARRIER GAS: He

| # | RT    | Scan | Height    | Area      | Area % | Norm % |
|---|-------|------|-----------|-----------|--------|--------|
| 2 | 3.469 | 94   | 2,786,442 | 223,332.5 | 0.463  | 5.78   |

| Pk # | RT    | Hit | Compound Name                                                                                                                                                       | Match | R.Match | Prob. | CAS         | Library |
|------|-------|-----|---------------------------------------------------------------------------------------------------------------------------------------------------------------------|-------|---------|-------|-------------|---------|
| 2    | 3.469 | 1   | Furane-3,4(2H,5H)-dione, 2,2-dimethyl-5-spiro-cyclohexane-, dioxime                                                                                                 | 391   | 528     | 4.1   | 104116-53-2 | mainlib |
|      |       | 2   | Thieno[2,3-c]furan-3-carbonitrile, 2-amino-4,6-dihydro-4,4,6,6-tetramethyl-                                                                                         | 391   | 518     | 4.1   | 447412-24-0 | mainlib |
|      |       | 3   | 3-Dimethylamino-2-(4-chlorphenyl)-thioacrylamide                                                                                                                    | 388   | 527     | 3.6   |             | mainlib |
|      |       | 4   | Tetradecanoic acid, (3,3a,4,6a,7,8,9,10,10a,10b-decahydro-3a,8,10a-trihydroxy-2,10-dimethyl-3-oxobenz[e]azulen-5-yl)methyl ester, [3aR-(3aà,6aà,8á,10á,10aá,10bá)]- | 386   | 460     | 3.3   | 77573-28-5  | mainlib |
|      |       | 5   | Strychane, 1-acetyl-20à-hydroxy-16-methylene-                                                                                                                       | 385   | 463     | 3.2   | 2111-98-0   | mainlib |
|      |       | 6   | 2-Oleoylglycerol, 2TMS derivative                                                                                                                                   | 381   | 468     | 2.7   | 56554-42-8  | mainlib |
|      |       | 7   | 1,2-Benzisothiazol-3-amine, TBDMS derivative                                                                                                                        | 379   | 530     | 2.5   |             | mainlib |
|      |       | 8   | d-Mannitol, 1-decylsulfonyl-                                                                                                                                        | 376   | 484     | 2.2   |             | mainlib |
|      |       | 9   | i-Propyl 9-tetradecenoate                                                                                                                                           | 373   | 545     | 2.0   |             | mainlib |
|      |       | 10  | Pyridine-4-carboxylic acid, 2,6-dichloro-, [5-(4-chlorophenyl)-2-thienylmethyl] ester                                                                               | 373   | 481     | 2.0   |             | mainlib |

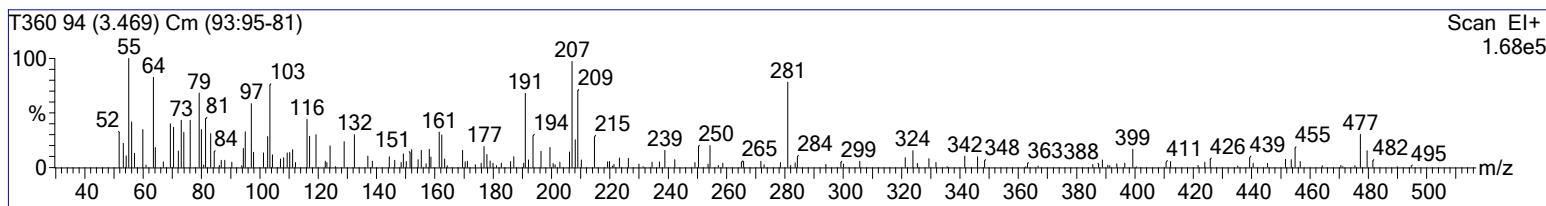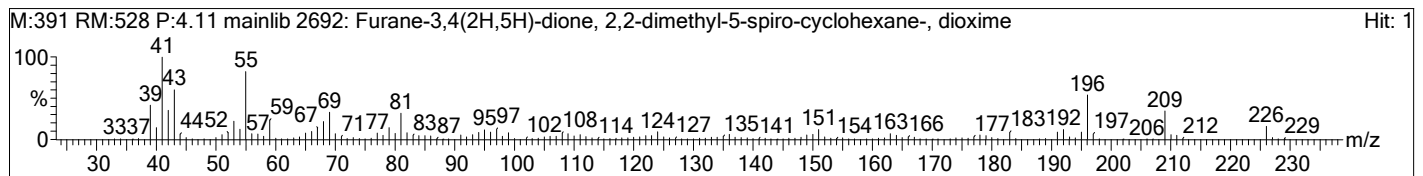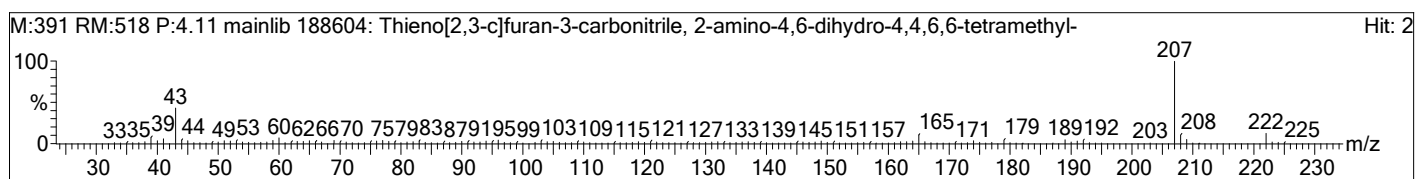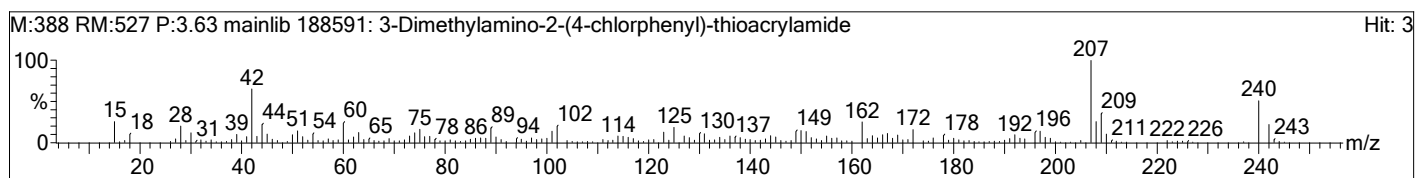

# TAMILNADU AGRICULTURAL UNIVERSITY - AGRICULTURAL MICROBIOLOGY

INSTRUMENT: PERKIN ELMER CLARUS SQ8C  
 INJECTION VOL: 1 MICRO LITER  
 SAMPLE ID : T360

COLOUMN: DB-5 MS CAPILARY STANDARD NON - POLARCOLOUMN  
 DIMENSION: 30Mts, ID: 0.25 mm, FILM: 0.25 IM CARRIER GAS: He

| # | RT    | Scan | Height    | Area      | Area % | Norm % |
|---|-------|------|-----------|-----------|--------|--------|
| 3 | 3.984 | 197  | 3,394,792 | 142,729.2 | 0.296  | 3.70   |

| Pk # | RT    | Hit | Compound Name                                                                         | Match | R.Match | Prob. | CAS         | Library   |
|------|-------|-----|---------------------------------------------------------------------------------------|-------|---------|-------|-------------|-----------|
| 3    | 3.984 | 1   | Glafenin                                                                              | 366   | 759     | 5.7   | 3820-67-5   | nist_msms |
|      |       | 2   | Hexadecanoic acid, 2-(octadecyloxy)ethyl ester                                        | 355   | 419     | 3.9   | 29899-13-6  | mainlib   |
|      |       | 3   | 12-Hydroxyoctadecanethioic acid, S-t-butyl ester                                      | 353   | 423     | 3.6   | 58587-08-9  | mainlib   |
|      |       | 4   | (5á,13á) Androst-8-en-3-one, 17-19-diacetoxy-4,4-dimethyl-                            | 351   | 400     | 3.3   |             | mainlib   |
|      |       | 5   | 3-Fluoro-3-(2-oxo-2-phenyl-ethylsulfanyl)-2-trifluoromethyl-acrylic acid methyl ester | 349   | 410     | 3.1   | 329735-34-4 | mainlib   |
|      |       | 6   | Glafenin                                                                              | 346   | 569     | 5.7   | 3820-67-5   | nist_msms |
|      |       | 7   | Methyl 2-hydroxy-eicosanoate                                                          | 342   | 483     | 2.3   |             | mainlib   |
|      |       | 8   | Sebacic acid, di(2,2-dichloroethyl) ester                                             | 340   | 480     | 2.2   |             | mainlib   |
|      |       | 9   | 1,2-Propanediol, 3-(octadecyloxy)-, diacetate                                         | 340   | 411     | 2.2   | 21994-81-0  | mainlib   |
|      |       | 10  | 6,8-Dichloro-2-trifluoromethyl-4-quinolinol                                           | 339   | 445     | 2.1   | 18706-23-5  | mainlib   |

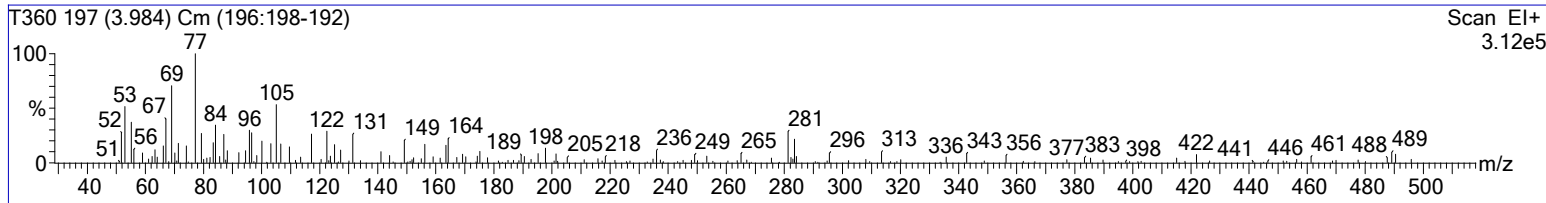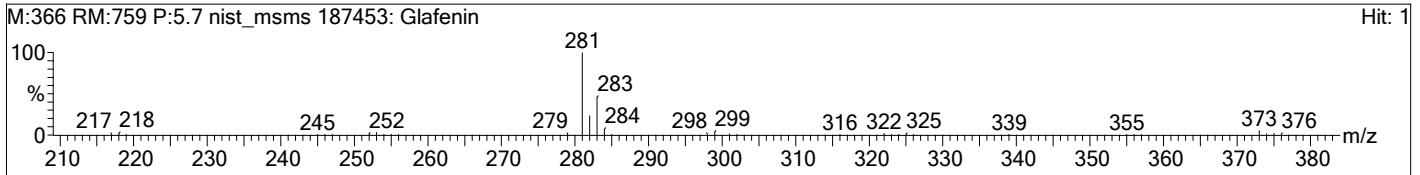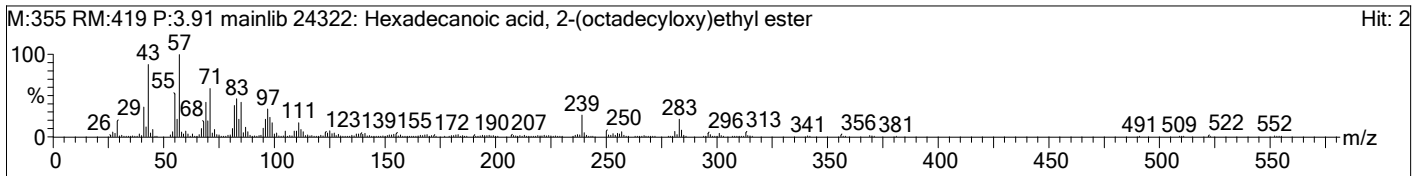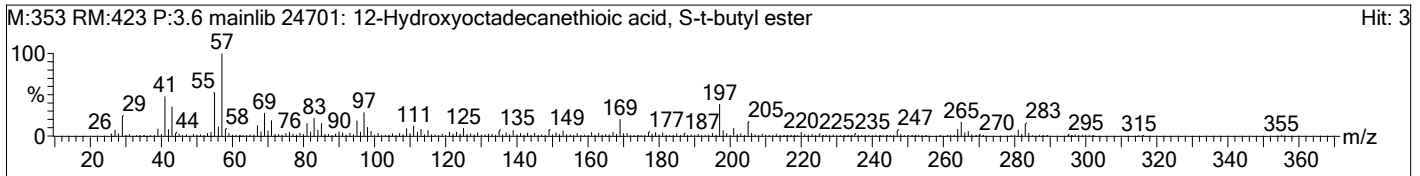

# TAMILNADU AGRICULTURAL UNIVERSITY - AGRICULTURAL MICROBIOLOGY

INSTRUMENT: PERKIN ELMER CLARUS SQ8C  
 INJECTION VOL: 1 MICRO LITER  
 SAMPLE ID : T360

COLOUMN: DB-5 MS CAPILARY STANDARD NON - POLARCOLOUMN  
 DIMENSION: 30Mts, ID: 0.25 mm, FILM: 0.25 IM CARRIER GAS: He

| # | RT    | Scan | Height    | Area      | Area % | Norm % |
|---|-------|------|-----------|-----------|--------|--------|
| 4 | 4.224 | 245  | 3,168,833 | 194,806.7 | 0.404  | 5.05   |

| PK # | RT    | Hit | Compound Name                                                                                                                                                                                              | Match | R.Match | Prob. | CAS         | Library |
|------|-------|-----|------------------------------------------------------------------------------------------------------------------------------------------------------------------------------------------------------------|-------|---------|-------|-------------|---------|
| 4    | 4.224 | 1   | 13,14-Epoxyursan-3-ol, acetate                                                                                                                                                                             | 379   | 422     | 15.5  |             | mainlib |
|      |       | 2   | 9-Desoxo-9-x-acetoxy-3,8,12-tri-O-acetylingol                                                                                                                                                              | 371   | 401     | 11.6  |             | mainlib |
|      |       | 3   | 13,14-Epoxyoleanan-3-ol, acetate                                                                                                                                                                           | 367   | 413     | 9.8   |             | mainlib |
|      |       | 4   | Ethyl iso-allocholate                                                                                                                                                                                      | 367   | 412     | 9.8   |             | mainlib |
|      |       | 5   | 6-Amino-5-cyano-4-(5-cyano-2,4-dimethyl-1H-pyrrol-3-yl)-2-methyl-4H-pyran-3-carboxylic acid ethyl ester                                                                                                    | 358   | 448     | 7.1   |             | mainlib |
|      |       | 6   | 9,10-Secocholesta-5,7,10(19)-triene-3,24,25-triol, (3á,5Z,7E)-                                                                                                                                             | 346   | 450     | 4.7   | 40013-87-4  | mainlib |
|      |       | 7   | à-Cortolone, 4TMS derivative                                                                                                                                                                               | 337   | 354     | 3.4   | 56196-46-4  | replib  |
|      |       | 8   | 1H-2,8a-Methanocyclopenta[a]cyclopropa[e]cyclodecen-11-one, 5,6-bis(acetyloxy)-4-[(acetyloxy)methyl]-1a,2,5,5a,6,9,10,10a-octahydro-5a-hydroxy-1,1,7,9-tetramethyl-, [1aR-(1aà,2à,5á,5aá,6á,8aà,9à,10aà)]- | 327   | 358     | 2.4   | 30220-45-2  | mainlib |
|      |       | 9   | Aminoacetamide, N-methyl-N-[4-(1-pyrrolidinyl)-2-butynyl]-N',N'-bis(trifluoroacetyl)                                                                                                                       | 324   | 390     | 2.1   |             | mainlib |
|      |       | 10  | 3à,5à-Cyclo-ergosta-7,9(11),22t-triene-6á-ol                                                                                                                                                               | 323   | 401     | 2.1   | 118978-72-6 | mainlib |

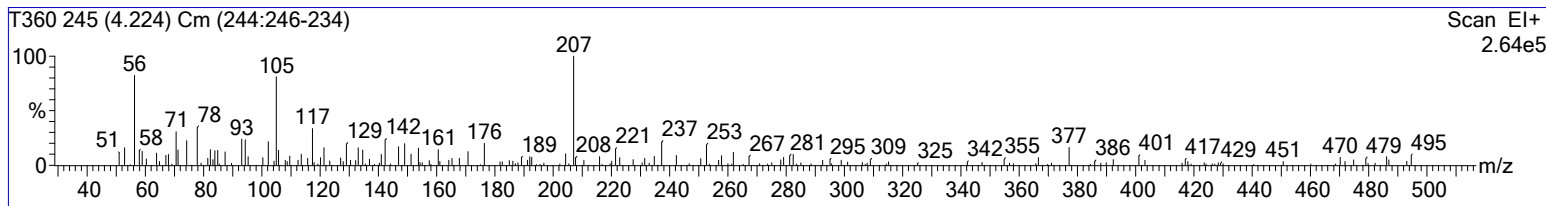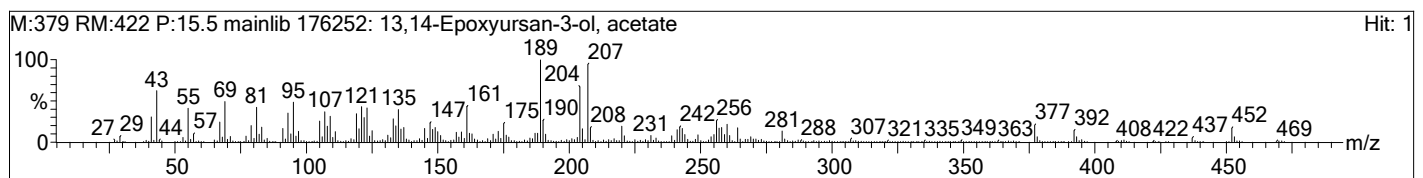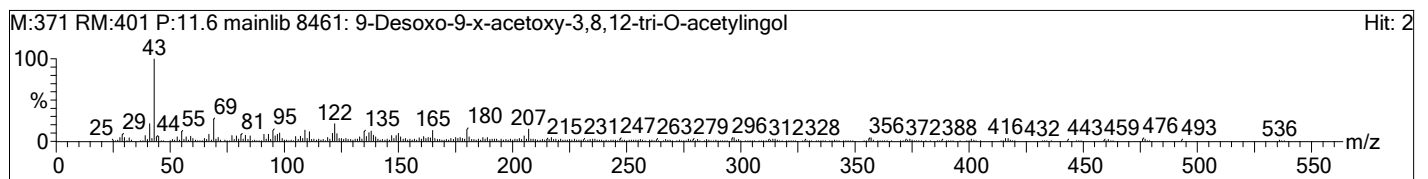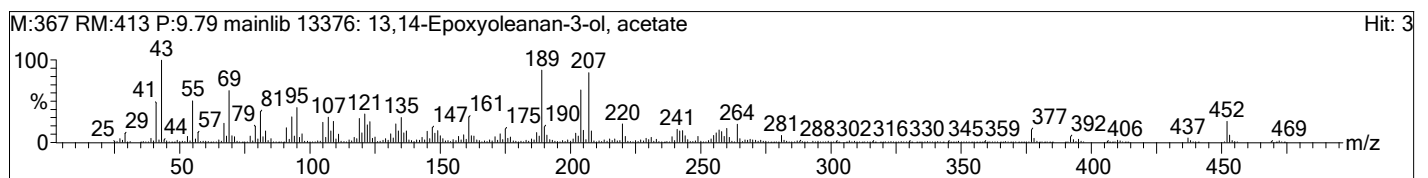

# TAMILNADU AGRICULTURAL UNIVERSITY - AGRICULTURAL MICROBIOLOGY

INSTRUMENT: PERKIN ELMER CLARUS SQ8C  
 INJECTION VOL: 1 MICRO LITER  
 SAMPLE ID : T360

COLOUMN: DB-5 MS CAPILARY STANDARD NON - POLARCOLOUMN  
 DIMENSION: 30Mts, ID: 0.25 mm, FILM: 0.25 IM CARRIER GAS: He

| # | RT    | Scan | Height    | Area      | Area % | Norm % |
|---|-------|------|-----------|-----------|--------|--------|
| 5 | 4.409 | 282  | 2,950,548 | 126,625.3 | 0.263  | 3.28   |

| Pk # | RT    | Hit | Compound Name                                                                                                                       | Match | R.Match | Prob. | CAS        | Library   |
|------|-------|-----|-------------------------------------------------------------------------------------------------------------------------------------|-------|---------|-------|------------|-----------|
| 5    | 4.409 | 1   | 1,4-Pentanediamine                                                                                                                  | 382   | 747     | 12.3  | 591-77-5   | mainlib   |
|      |       | 2   | Carbamate, N-(2,6,6-trimethyl-1-[3-oxo-1-butenyl]-2-cyclohexenyl)-, methyl ester                                                    | 374   | 444     | 9.2   |            | mainlib   |
|      |       | 3   | Strychane, 1-acetyl-20-hydroxy-16-methylene-                                                                                        | 360   | 422     | 5.7   | 2111-98-0  | mainlib   |
|      |       | 4   | L-Carnitine                                                                                                                         | 350   | 689     | 4.1   | 541-15-1   | nist_msms |
|      |       | 5   | 5-Thianonane, 3,7-bis(9-borabicyclo[3.3.1]non-9-yloxy)-                                                                             | 344   | 376     | 3.2   |            | mainlib   |
|      |       | 6   | Bethanechol cation                                                                                                                  | 334   | 873     | 2.2   | 674-38-4   | nist_msms |
|      |       | 7   | 1,2,4-Methenocyclopenta[cd]pentalene-5-carboxaldehyde, 2,2a,3,3,4,7-hexachlorodecahydro-, (1à,2à,2aà,4à,4aà,5à,6aà,6bà,7R*)-        | 334   | 370     | 2.2   | 7421-93-4  | replib    |
|      |       | 8   | Curan-17-oic acid, 19,20-dihydroxy-, methyl ester, (19S)-                                                                           | 331   | 428     | 2.0   | 2111-90-2  | mainlib   |
|      |       | 9   | 8,13-Epoxy-labadan-1,6,7,9-tetraol-11-one, 7-O-acetate(ester)                                                                       | 331   | 388     | 2.0   | 66428-88-4 | mainlib   |
|      |       | 10  | Acetic acid, 3-acetoxy-6-(2-cyanovinyl)-3a,6-dimethyl-2,3,3a,4,5,5a,6,9,9a,9b-decahydro-1H-cyclopenta[a]naphthalen-7-ylmethyl ester | 331   | 371     | 2.0   |            | mainlib   |

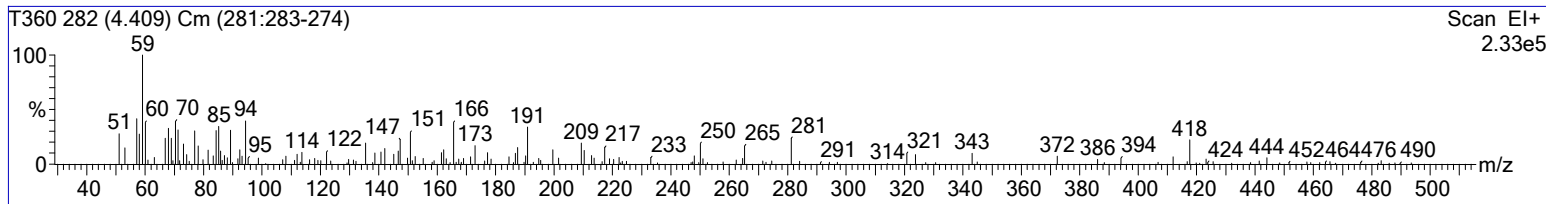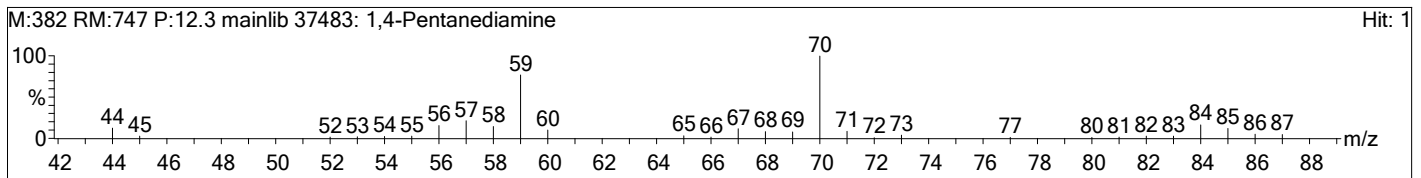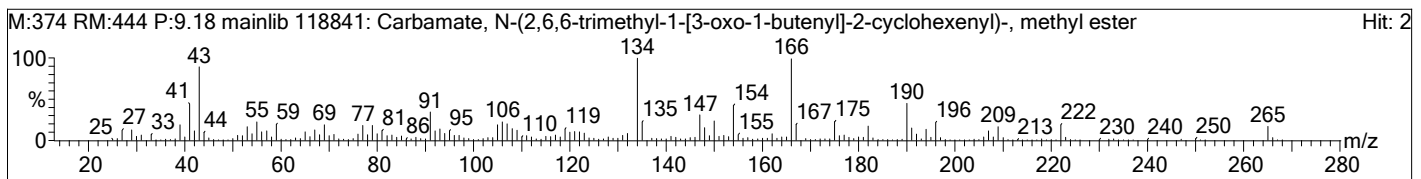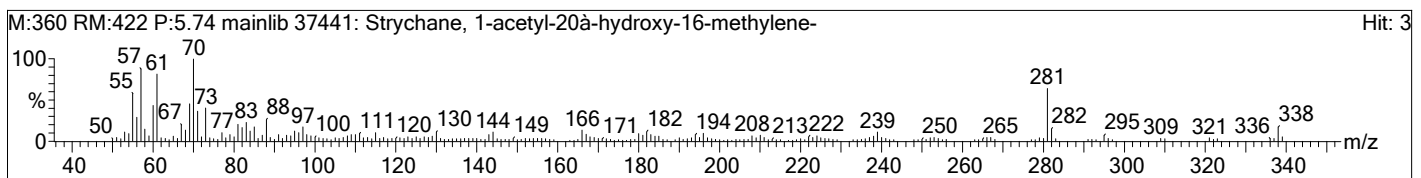

# TAMILNADU AGRICULTURAL UNIVERSITY - AGRICULTURAL MICROBIOLOGY

INSTRUMENT: PERKIN ELMER CLARUS SQ8C  
 INJECTION VOL: 1 MICRO LITER  
 SAMPLE ID : T360

COLOUMN: DB-5 MS CAPILARY STANDARD NON - POLARCOLOUMN  
 DIMENSION: 30Mts, ID: 0.25 mm, FILM: 0.25 IM CARRIER GAS: He

| # | RT    | Scan | Height     | Area      | Area % | Norm % |
|---|-------|------|------------|-----------|--------|--------|
| 6 | 5.559 | 512  | 10,848,842 | 452,753.3 | 0.940  | 11.73  |

| Pk # | RT    | Hit | Compound Name                       | Match | R.Match | Prob. | CAS        | Library |
|------|-------|-----|-------------------------------------|-------|---------|-------|------------|---------|
| 6    | 5.559 | 1   | Benzaldehyde, 4-methyl-             | 675   | 855     | 26.5  | 104-87-0   | replib  |
|      |       | 2   | Benzaldehyde, 3-methyl-             | 667   | 846     | 19.8  | 620-23-5   | replib  |
|      |       | 3   | Benzaldehyde, 4-methyl-             | 658   | 845     | 26.5  | 104-87-0   | replib  |
|      |       | 4   | Benzaldehyde, 4-methyl-             | 658   | 838     | 26.5  | 104-87-0   | mainlib |
|      |       | 5   | Benzaldehyde, 3-methyl-             | 650   | 837     | 19.8  | 620-23-5   | replib  |
|      |       | 6   | Benzaldehyde, 4-methyl-             | 650   | 827     | 26.5  | 104-87-0   | replib  |
|      |       | 7   | Bicyclo[4.2.0]octa-1,3,5-trien-7-ol | 649   | 822     | 10.2  | 35447-99-5 | mainlib |
|      |       | 8   | Benzaldehyde, 2-methyl-             | 643   | 816     | 8.0   | 529-20-4   | replib  |
|      |       | 9   | Benzaldehyde, 4-methyl-             | 641   | 818     | 26.5  | 104-87-0   | replib  |
|      |       | 10  | Benzaldehyde, 3-methyl-             | 629   | 796     | 19.8  | 620-23-5   | mainlib |

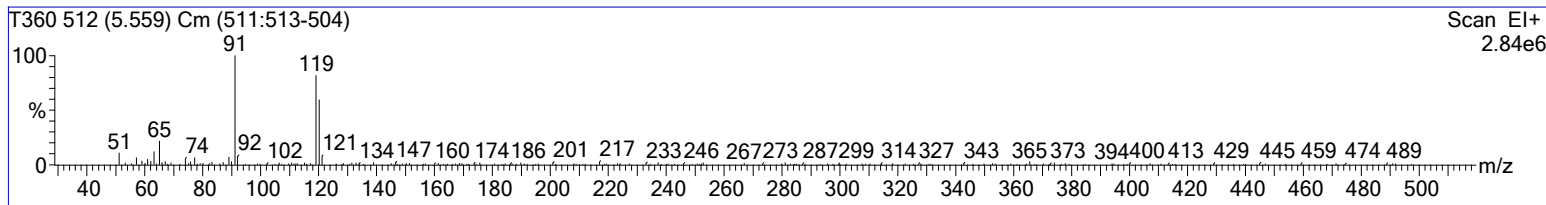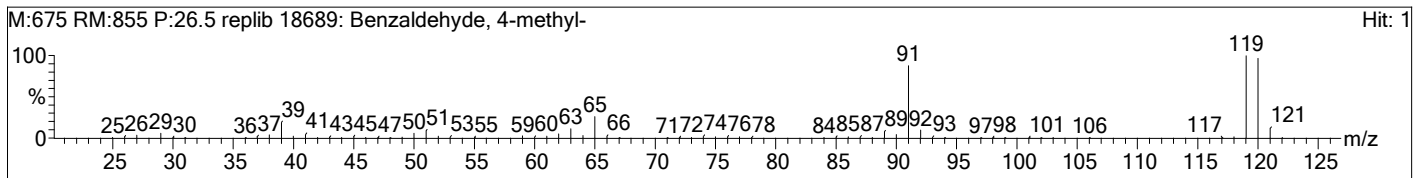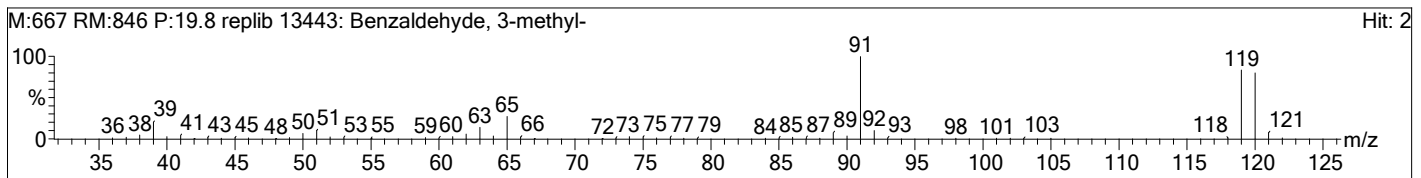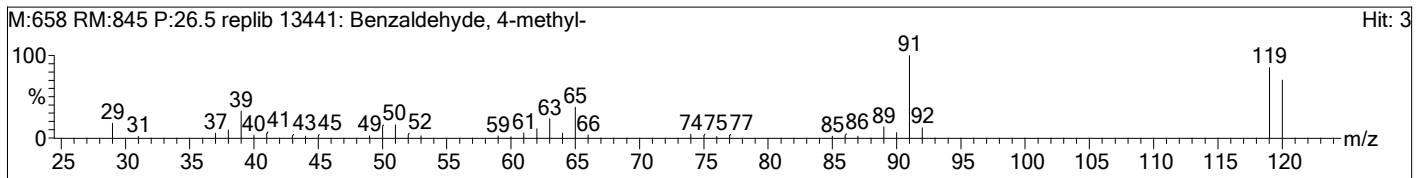

# TAMILNADU AGRICULTURAL UNIVERSITY - AGRICULTURAL MICROBIOLOGY

INSTRUMENT: PERKIN ELMER CLARUS SQ8C  
 INJECTION VOL: 1 MICRO LITER  
 SAMPLE ID : T360

COLOUMN: DB-5 MS CAPILARY STANDARD NON - POLARCOLOUMN  
 DIMENSION: 30Mts, ID: 0.25 mm, FILM: 0.25 IM CARRIER GAS: He

| # | RT    | Scan | Height     | Area      | Area % | Norm % |
|---|-------|------|------------|-----------|--------|--------|
| 7 | 7.915 | 983  | 13,734,306 | 346,631.9 | 0.719  | 8.98   |

| Pk # | RT    | Hit | Compound Name                                 | Match | R.Match | Prob. | CAS        | Library |
|------|-------|-----|-----------------------------------------------|-------|---------|-------|------------|---------|
| 7    | 7.915 | 1   | Benzene, 1,3-bis(1,1-dimethylethyl)-          | 719   | 820     | 40.6  | 1014-60-4  | replib  |
|      |       | 2   | Benzene, 1,3-bis(1,1-dimethylethyl)-          | 719   | 818     | 40.6  | 1014-60-4  | replib  |
|      |       | 3   | Benzene, 1,3-bis(1,1-dimethylethyl)-          | 711   | 811     | 40.6  | 1014-60-4  | mainlib |
|      |       | 4   | Benzene, 1,4-dimethyl-2,5-bis(1-methylethyl)- | 686   | 747     | 10.6  | 10375-96-9 | replib  |
|      |       | 5   | Benzene, 1,4-bis(1,1-dimethylethyl)-          | 680   | 757     | 8.4   | 1012-72-2  | mainlib |
|      |       | 6   | Benzene, 1,4-bis(1,1-dimethylethyl)-          | 678   | 765     | 8.4   | 1012-72-2  | replib  |
|      |       | 7   | m-Cymene, 5-tert-butyl-                       | 670   | 740     | 5.9   | 29577-19-3 | mainlib |
|      |       | 8   | Benzene, 1,5-dimethyl-2,4-bis(1-methylethyl)- | 669   | 757     | 5.7   | 5186-68-5  | mainlib |
|      |       | 9   | Precocene I                                   | 664   | 741     | 4.6   | 17598-02-6 | replib  |
|      |       | 10  | Benzene, 1,4-dimethyl-2,5-bis(1-methylethyl)- | 661   | 731     | 10.6  | 10375-96-9 | replib  |

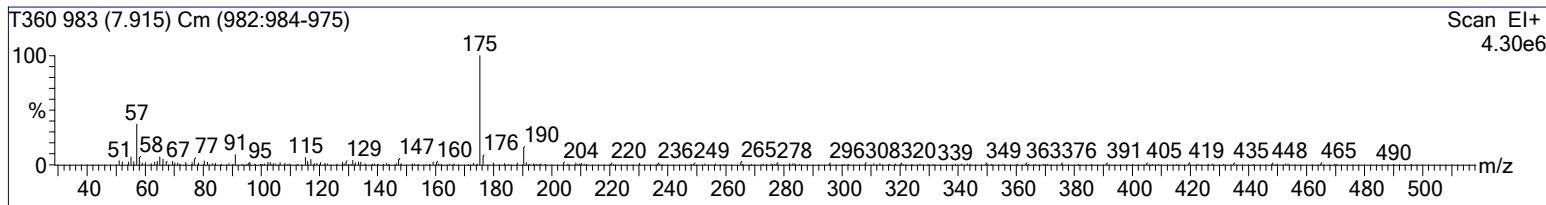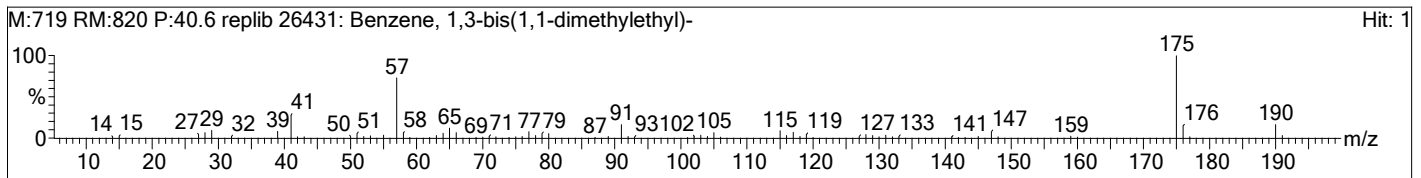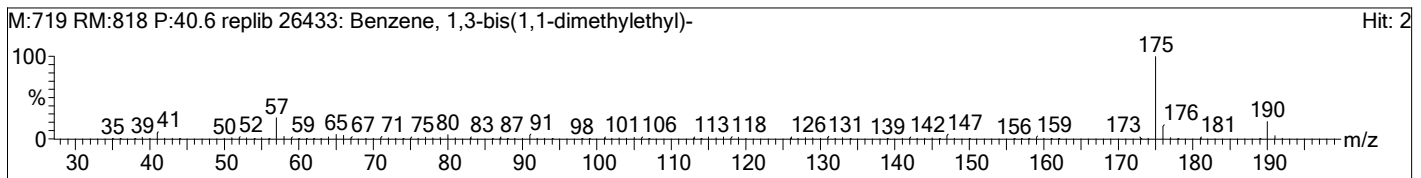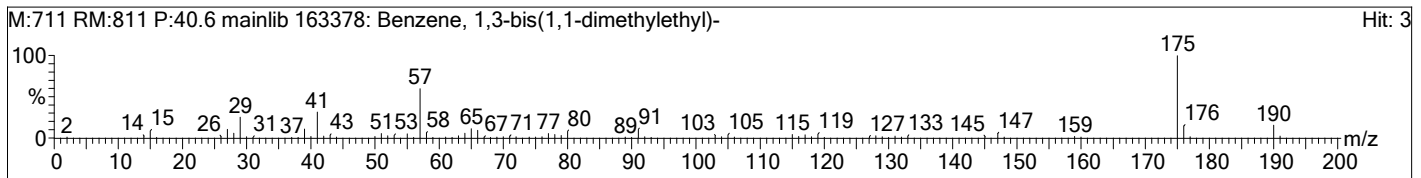

# TAMILNADU AGRICULTURAL UNIVERSITY - AGRICULTURAL MICROBIOLOGY

INSTRUMENT: PERKIN ELMER CLARUS SQ8C  
 INJECTION VOL: 1 MICRO LITER  
 SAMPLE ID : T360

COLOUMN: DB-5 MS CAPILARY STANDARD NON - POLARCOLOUMN  
 DIMENSION: 30Mts, ID: 0.25 mm, FILM: 0.25 IM CARRIER GAS: He

| # | RT     | Scan | Height     | Area        | Area % | Norm % |
|---|--------|------|------------|-------------|--------|--------|
| 8 | 11.257 | 1651 | 26,787,280 | 1,240,238.1 | 2.574  | 32.12  |

| Pk # | RT     | Hit | Compound Name    | Match | R.Match | Prob. | CAS      | Library |
|------|--------|-----|------------------|-------|---------|-------|----------|---------|
| 8    | 11.257 | 1   | Cyclotetradecane | 778   | 897     | 5.9   | 295-17-0 | replib  |
|      |        | 2   | 1-Dodecanol      | 775   | 882     | 5.2   | 112-53-8 | replib  |
|      |        | 3   | 1-Dodecanol      | 772   | 880     | 5.2   | 112-53-8 | replib  |
|      |        | 4   | n-Tridecan-1-ol  | 772   | 878     | 4.6   | 112-70-9 | replib  |
|      |        | 5   | 1-Dodecene       | 771   | 877     | 4.4   | 112-41-4 | replib  |
|      |        | 6   | 1-Undecanol      | 766   | 898     | 3.6   | 112-42-5 | mainlib |
|      |        | 7   | 1-Dodecanol      | 766   | 878     | 5.2   | 112-53-8 | replib  |
|      |        | 8   | Cyclododecane    | 763   | 855     | 3.2   | 294-62-2 | replib  |
|      |        | 9   | Cyclododecane    | 762   | 871     | 3.2   | 294-62-2 | replib  |
|      |        | 10  | 1-Dodecanol      | 762   | 868     | 5.2   | 112-53-8 | replib  |

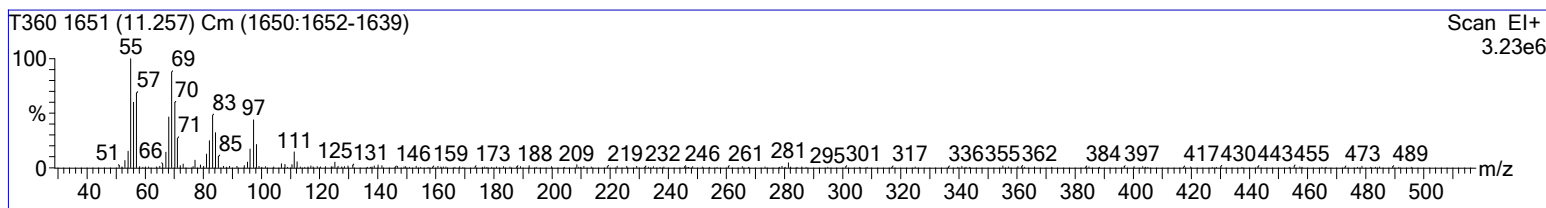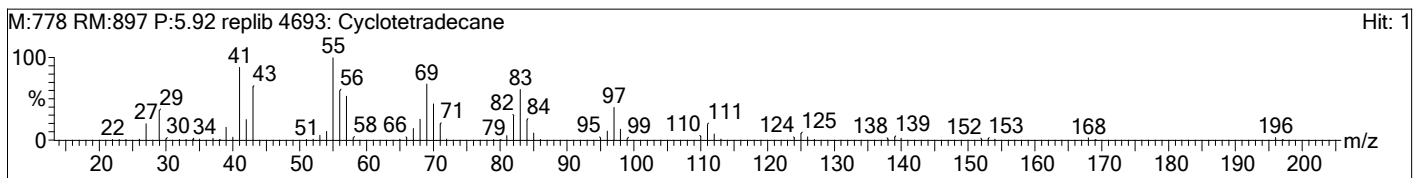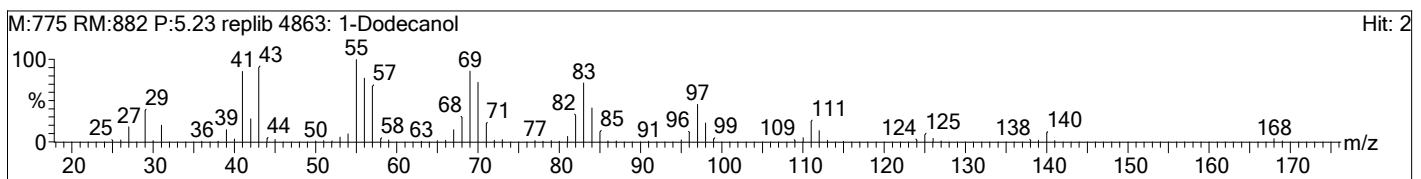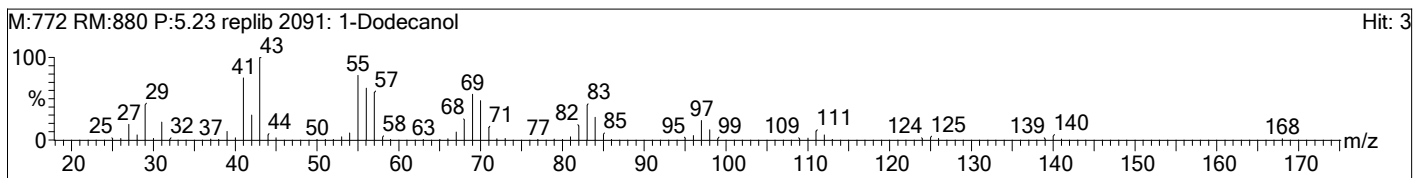



# TAMILNADU AGRICULTURAL UNIVERSITY - AGRICULTURAL MICROBIOLOGY

INSTRUMENT: PERKIN ELMER CLARUS SQ8C  
 INJECTION VOL: 1 MICRO LITER  
 SAMPLE ID : T360

COLOUMN: DB-5 MS CAPILARY STANDARD NON - POLARCOLOUMN  
 DIMENSION: 30Mts, ID: 0.25 mm, FILM: 0.25 IM CARRIER GAS: He

| # | RT     | Scan | Height    | Area      | Area % | Norm % |
|---|--------|------|-----------|-----------|--------|--------|
| 9 | 11.897 | 1779 | 5,271,523 | 237,998.5 | 0.494  | 6.16   |

| Pk # | RT     | Hit | Compound Name                       | Match | R.Match | Prob. | CAS       | Library |
|------|--------|-----|-------------------------------------|-------|---------|-------|-----------|---------|
| 9    | 11.897 | 1   | 2,4-Di-tert-butylphenol             | 612   | 733     | 27.6  | 96-76-4   | replib  |
|      |        | 2   | 2,4-Di-tert-butylphenol             | 602   | 771     | 27.6  | 96-76-4   | replib  |
|      |        | 3   | Phenol, 3,5-bis(1,1-dimethylethyl)- | 601   | 738     | 19.0  | 1138-52-9 | replib  |
|      |        | 4   | 2,4-Di-tert-butylphenol             | 593   | 743     | 27.6  | 96-76-4   | mainlib |
|      |        | 5   | Phenol, 3,5-bis(1,1-dimethylethyl)- | 585   | 734     | 19.0  | 1138-52-9 | replib  |
|      |        | 6   | Phenol, 2,6-bis(1,1-dimethylethyl)- | 583   | 715     | 9.8   | 128-39-2  | replib  |
|      |        | 7   | Phenol, 3,5-bis(1,1-dimethylethyl)- | 576   | 733     | 19.0  | 1138-52-9 | replib  |
|      |        | 8   | Phenol, 2,6-bis(1,1-dimethylethyl)- | 570   | 711     | 9.8   | 128-39-2  | replib  |
|      |        | 9   | Phenol, 2,6-bis(1,1-dimethylethyl)- | 569   | 708     | 9.8   | 128-39-2  | mainlib |
|      |        | 10  | Phenol, 2,5-bis(1,1-dimethylethyl)- | 568   | 695     | 5.9   | 5875-45-6 | replib  |

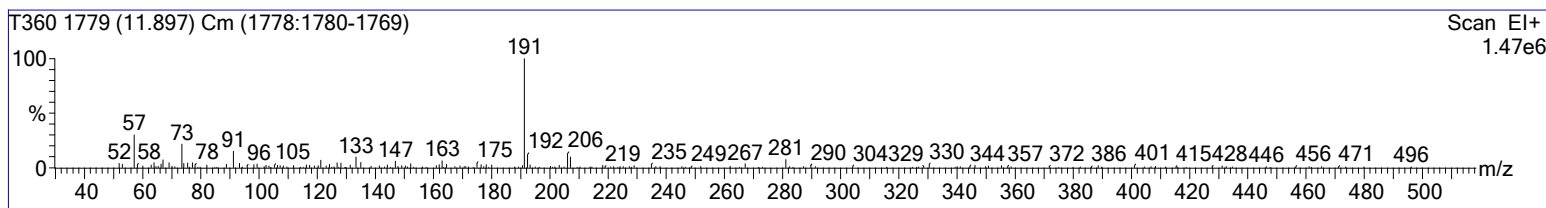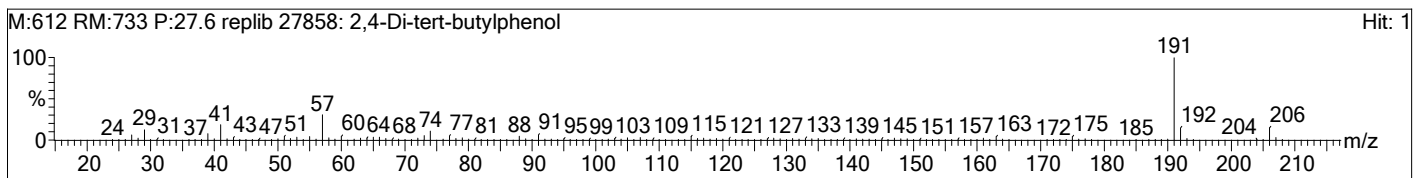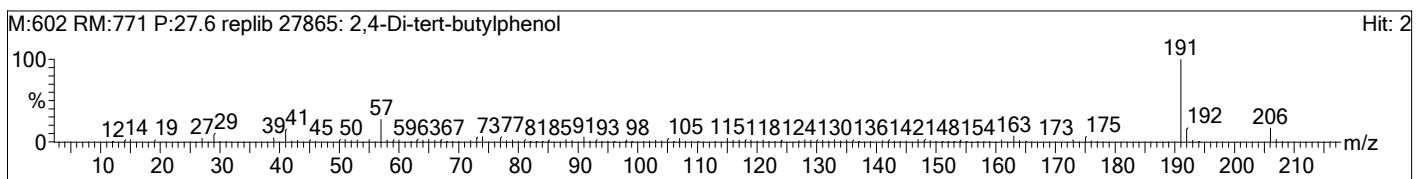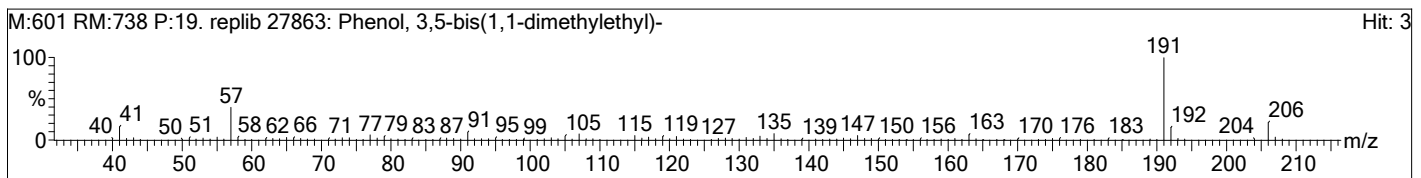

# TAMILNADU AGRICULTURAL UNIVERSITY - AGRICULTURAL MICROBIOLOGY

INSTRUMENT: PERKIN ELMER CLARUS SQ8C  
 INJECTION VOL: 1 MICRO LITER  
 SAMPLE ID : T360

COLOUMN: DB-5 MS CAPILARY STANDARD NON - POLARCOLOUMN  
 DIMENSION: 30Mts, ID: 0.25 mm, FILM: 0.25 IM CARRIER GAS: He

| #  | RT     | Scan | Height    | Area      | Area % | Norm % |
|----|--------|------|-----------|-----------|--------|--------|
| 10 | 13.698 | 2139 | 4,552,752 | 168,251.2 | 0.349  | 4.36   |

| PK # | RT     | Hit | Compound Name                                                                                             | Match | R.Match | Prob. | CAS        | Library |
|------|--------|-----|-----------------------------------------------------------------------------------------------------------|-------|---------|-------|------------|---------|
| 10   | 13.698 | 1   | D-Mannitol, 1,2:3,4:5,6-tris-O-(1-methylethylidene)-                                                      | 418   | 713     | 31.1  | 3969-59-3  | replib  |
|      |        | 2   | D-Mannitol, 1,2:3,4:5,6-tris-O-(1-methylethylidene)-                                                      | 414   | 735     | 31.1  | 3969-59-3  | mainlib |
|      |        | 3   | 1,2:5,6-Di-O-isopropylidene-à-d-glucofuranose, acetate                                                    | 393   | 700     | 9.5   |            | mainlib |
|      |        | 4   | Acetate, [1-(5,5-dimethylperhydro[1,3]dioxolo[4,5-d]oxireno[2,3-b]pyran-1-yl)-1-methylethoxy]methyl ester | 387   | 603     | 7.4   | 26289-49-6 | mainlib |
|      |        | 5   | 5-(2-Chloro-6-fluorobenzyl)-6-methyl-2-(2-propynylsulfanyl)-4-pyrimidinol                                 | 384   | 458     | 6.6   |            | mainlib |
|      |        | 6   | à-D-Glucopyranose, 1,2:5,6-di-O-isopropi=yidene, 3-acetyl-                                                | 381   | 668     | 5.8   |            | mainlib |
|      |        | 7   | 4-Estren-17à-methyl-17à-ol-3-one, di-trimethylsilyl                                                       | 378   | 417     | 5.1   |            | mainlib |
|      |        | 8   | Butanedioic acid, didodecyl ester                                                                         | 361   | 478     | 2.8   | 5980-15-4  | mainlib |
|      |        | 9   | Propionic acid, 3,3-bis(3,4-dimethoxyphenyl)-, methyl ester                                               | 354   | 434     | 2.1   |            | mainlib |
|      |        | 10  | 3-Chloro-2-nitrobenzyl alcohol, pentafluoropropionate                                                     | 337   | 447     | 1.2   |            | mainlib |

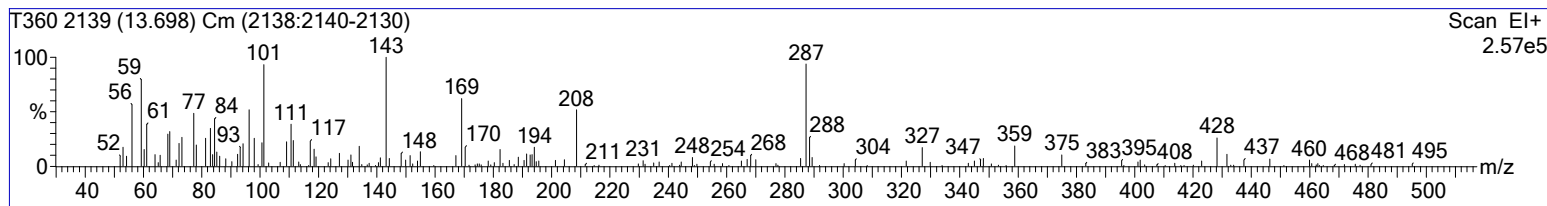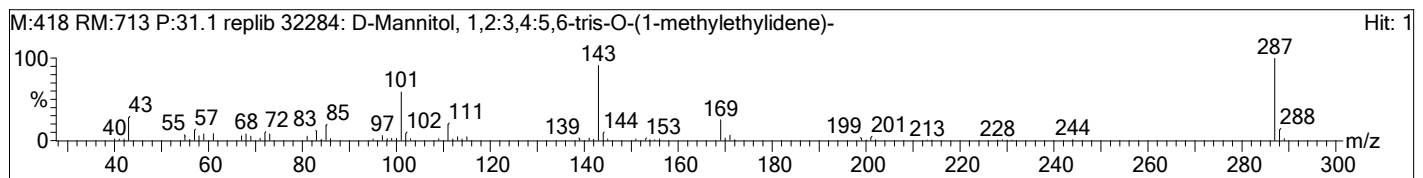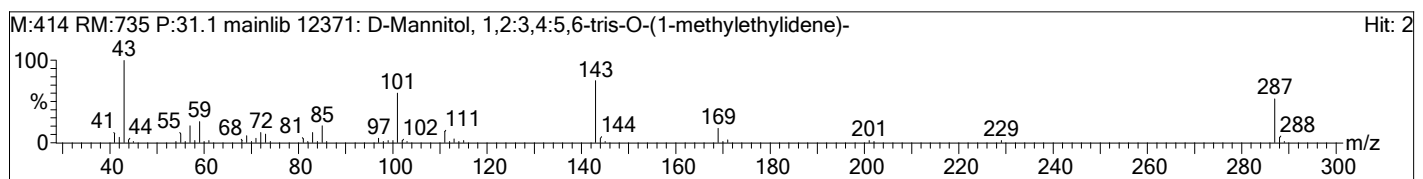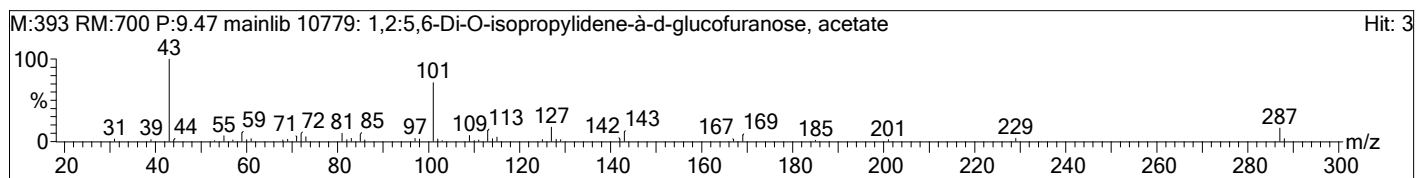

# TAMILNADU AGRICULTURAL UNIVERSITY - AGRICULTURAL MICROBIOLOGY

INSTRUMENT: PERKIN ELMER CLARUS SQ8C  
 INJECTION VOL: 1 MICRO LITER  
 SAMPLE ID : T360

COLOUMN: DB-5 MS CAPILARY STANDARD NON - POLARCOLOUMN  
 DIMENSION: 30Mts, ID: 0.25 mm, FILM: 0.25 IM CARRIER GAS: He

| #  | RT     | Scan | Height    | Area      | Area % | Norm % |
|----|--------|------|-----------|-----------|--------|--------|
| 11 | 14.418 | 2283 | 3,146,441 | 143,301.6 | 0.297  | 3.71   |

| PK # | RT     | Hit | Compound Name                                                                                 | Match | R.Match | Prob. | CAS        | Library   |
|------|--------|-----|-----------------------------------------------------------------------------------------------|-------|---------|-------|------------|-----------|
| 11   | 14.418 | 1   | 2,7-Diphenyl-1,6-dioxypyridazino[4,5:2',3']pyrrolo[4',5'-d]pyridazine                         | 452   | 527     | 12.2  | 91757-06-1 | mainlib   |
|      |        | 2   | Glafenin                                                                                      | 439   | 870     | 7.9   | 3820-67-5  | nist_msms |
|      |        | 3   | Propanoic acid, 2-(3-acetoxy-4,4,14-trimethylandro-8-en-17-yl)-                               | 424   | 447     | 4.8   |            | mainlib   |
|      |        | 4   | 3,6,9,12-Tetraoxatetradecan-1-ol, 14-[4-(1,1,3,3-tetramethylbutyl)phenoxy]-                   | 423   | 520     | 4.6   | 2315-64-2  | mainlib   |
|      |        | 5   | Glycine, N-[(3 $\alpha$ ,5 $\alpha$ )-24-oxo-3-[(trimethylsilyloxy)chol-24-yl]-, methyl ester | 423   | 498     | 4.6   | 57326-15-5 | mainlib   |
|      |        | 6   | Corynan-17-ol, 18,19-didehydro-10-methoxy-, acetate (ester)                                   | 416   | 491     | 3.5   | 56053-13-5 | mainlib   |
|      |        | 7   | Glafenin                                                                                      | 413   | 835     | 7.9   | 3820-67-5  | nist_msms |
|      |        | 8   | Octadecane, 1,1'-[1,3-propanediylbis(oxy)]bis-                                                | 410   | 433     | 2.8   | 17367-38-3 | mainlib   |
|      |        | 9   | Stearic acid, 3-(octadecyloxy)propyl ester                                                    | 409   | 445     | 2.6   | 17367-40-7 | mainlib   |
|      |        | 10  | 2-Myristinoyl pantetheine                                                                     | 405   | 477     | 2.2   |            | mainlib   |

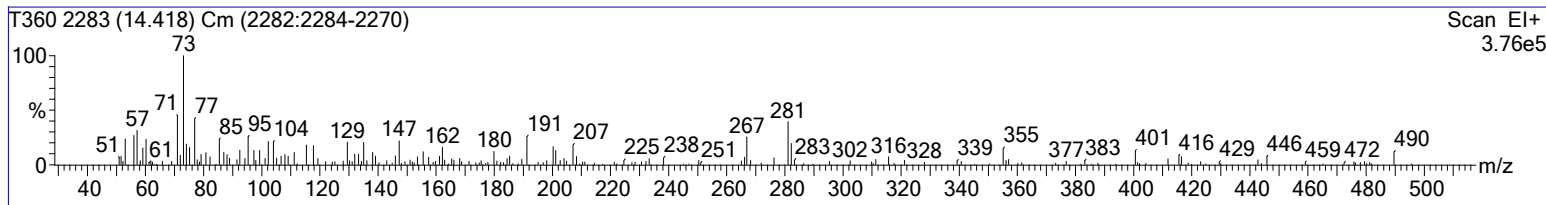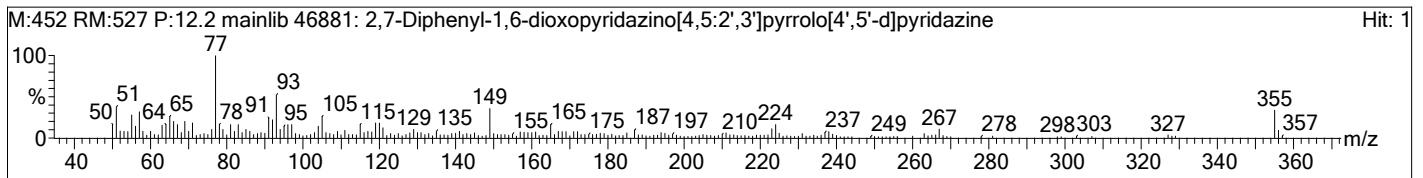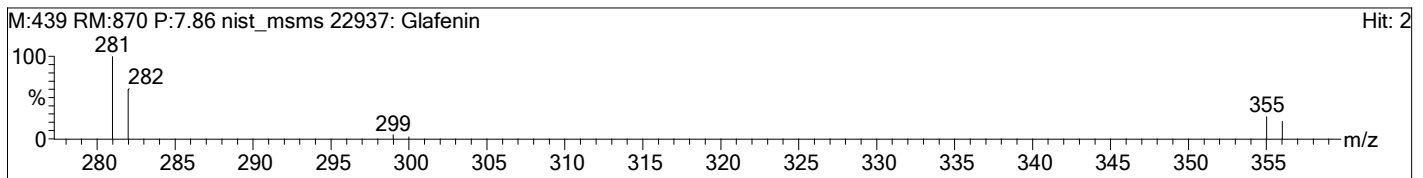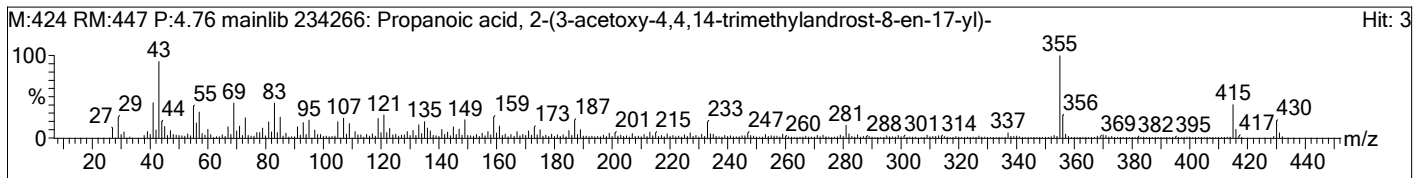

# TAMILNADU AGRICULTURAL UNIVERSITY - AGRICULTURAL MICROBIOLOGY

INSTRUMENT: PERKIN ELMER CLARUS SQ8C  
 INJECTION VOL: 1 MICRO LITER  
 SAMPLE ID : T360

COLOUMN: DB-5 MS CAPILARY STANDARD NON - POLARCOLOUMN  
 DIMENSION: 30Mts, ID: 0.25 mm, FILM: 0.25 IM CARRIER GAS: He

| #  | RT     | Scan | Height     | Area        | Area % | Norm % |
|----|--------|------|------------|-------------|--------|--------|
| 12 | 15.828 | 2565 | 94,334,768 | 3,861,235.5 | 8.013  | 100.00 |

| Pk # | RT     | Hit | Compound Name                              | Match | R.Match | Prob. | CAS        | Library |
|------|--------|-----|--------------------------------------------|-------|---------|-------|------------|---------|
| 12   | 15.828 | 1   | Dodecyl acrylate                           | 874   | 899     | 46.7  | 2156-97-0  | replib  |
|      |        | 2   | Dodecyl acrylate                           | 848   | 876     | 46.7  | 2156-97-0  | replib  |
|      |        | 3   | 1-Dodecanol                                | 820   | 872     | 9.1   | 112-53-8   | replib  |
|      |        | 4   | Dodecyl acrylate                           | 817   | 840     | 46.7  | 2156-97-0  | mainlib |
|      |        | 5   | 2-Propenoic acid, tridecyl ester           | 795   | 824     | 2.8   | 3076-04-8  | mainlib |
|      |        | 6   | 2-Propenoic acid, pentadecyl ester         | 787   | 811     | 2.1   | 43080-23-5 | mainlib |
|      |        | 7   | Z-10-Tetradecen-1-ol acetate               | 784   | 794     | 1.8   |            | mainlib |
|      |        | 8   | 1-Dodecanol                                | 779   | 811     | 9.1   | 112-53-8   | replib  |
|      |        | 9   | Cyclododecane                              | 778   | 802     | 1.4   | 294-62-2   | replib  |
|      |        | 10  | 2-Butenedioic acid (Z)-, monododecyl ester | 776   | 787     | 1.3   | 2424-61-5  | mainlib |

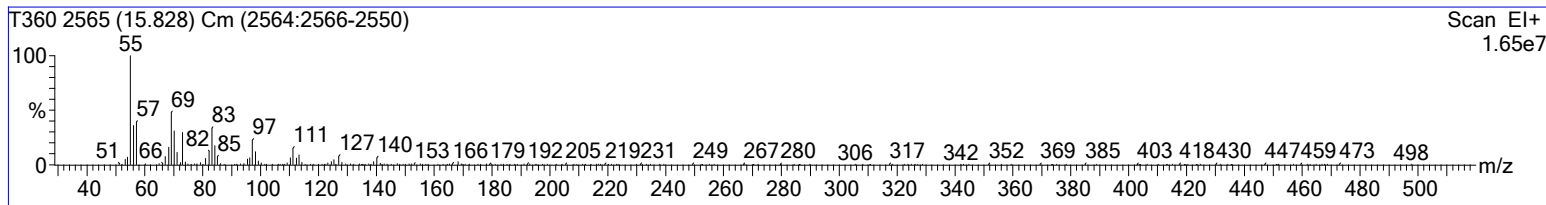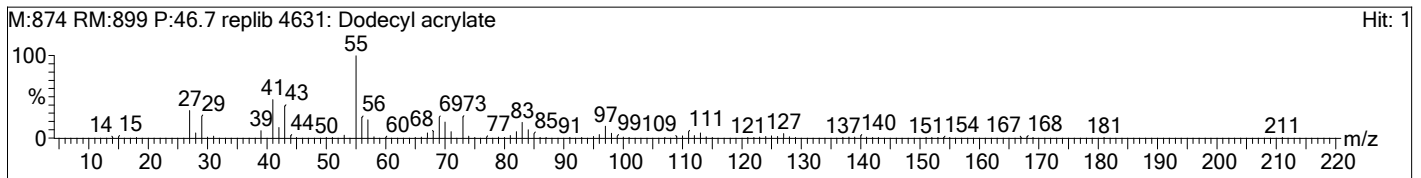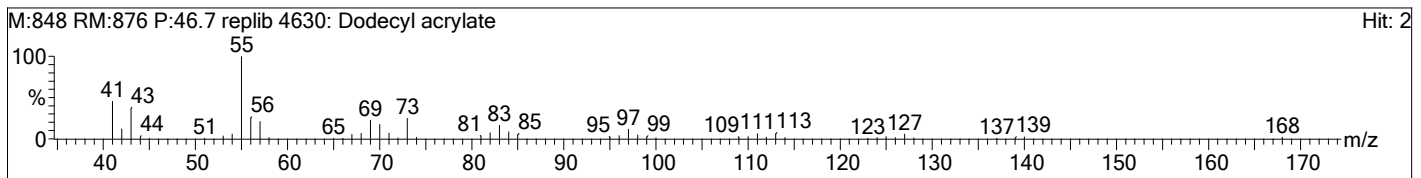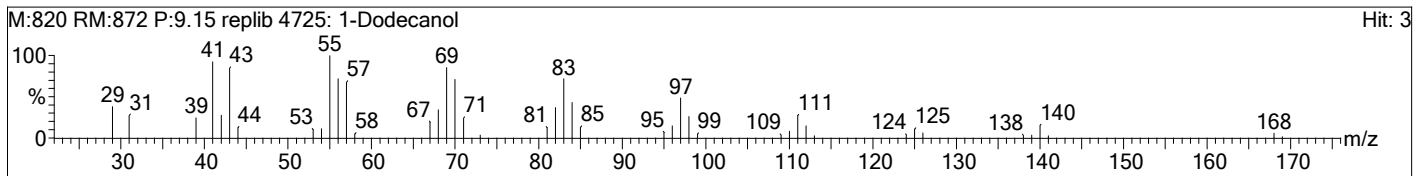

# TAMILNADU AGRICULTURAL UNIVERSITY - AGRICULTURAL MICROBIOLOGY

INSTRUMENT: PERKIN ELMER CLARUS SQ8C  
 INJECTION VOL: 1 MICRO LITER  
 SAMPLE ID : T360

COLOUMN: DB-5 MS CAPILARY STANDARD NON - POLARCOLOUMN  
 DIMENSION: 30Mts, ID: 0.25 mm, FILM: 0.25 IM CARRIER GAS: He

| #  | RT     | Scan | Height    | Area      | Area % | Norm % |
|----|--------|------|-----------|-----------|--------|--------|
| 13 | 15.984 | 2596 | 5,659,704 | 294,735.8 | 0.612  | 7.63   |

| Pk # | RT     | Hit | Compound Name                          | Match | R.Match | Prob. | CAS        | Library |
|------|--------|-----|----------------------------------------|-------|---------|-------|------------|---------|
| 13   | 15.984 | 1   | 3-Propionyloxy pentadecane             | 487   | 723     | 4.2   |            | mainlib |
|      |        | 2   | 1-Hexadecanol, 2-methyl-               | 484   | 572     | 3.7   | 2490-48-4  | mainlib |
|      |        | 3   | Acetic acid, chloro-, octadecyl ester  | 482   | 651     | 3.4   | 5348-82-3  | mainlib |
|      |        | 4   | E-10-Dodecen-1-ol propionate           | 479   | 648     | 3.0   |            | mainlib |
|      |        | 5   | 2-Hexadecanol                          | 479   | 575     | 3.0   | 14852-31-4 | replib  |
|      |        | 6   | Cyclohexane, 1,4-dimethyl-2-octadecyl- | 475   | 513     | 2.5   | 55282-02-5 | mainlib |
|      |        | 7   | 1-Heptacosanol                         | 473   | 634     | 2.3   | 2004-39-9  | replib  |
|      |        | 8   | Propanoic acid, decyl ester            | 472   | 719     | 2.3   | 5454-19-3  | mainlib |
|      |        | 9   | Octatriacontyl pentafluoropropionate   | 472   | 533     | 2.3   |            | mainlib |
|      |        | 10  | 5-Octadecenal                          | 468   | 557     | 1.9   | 56554-88-2 | mainlib |

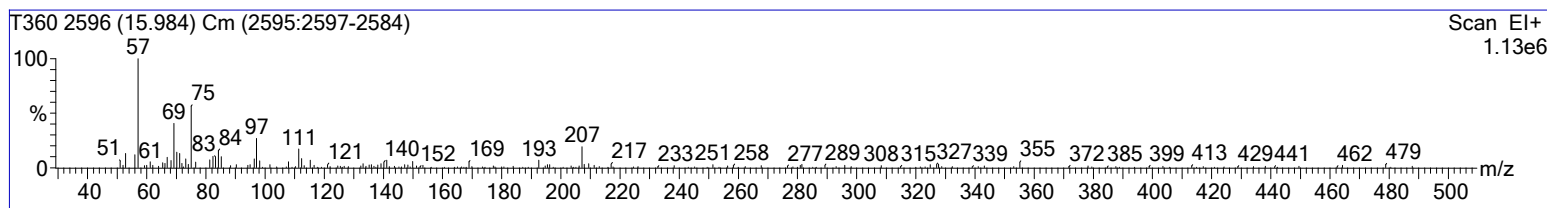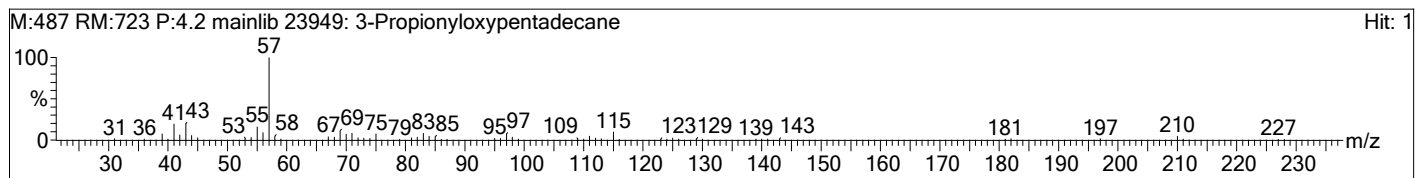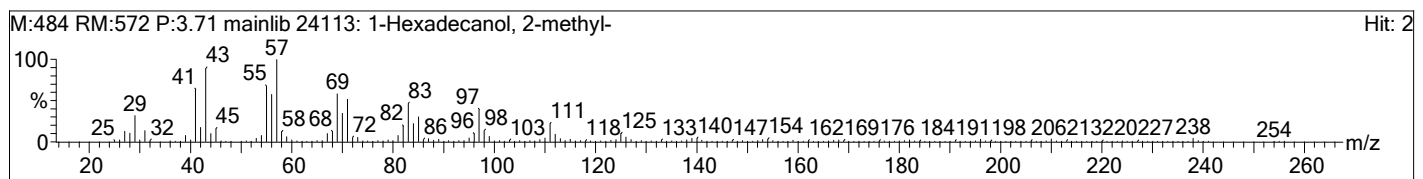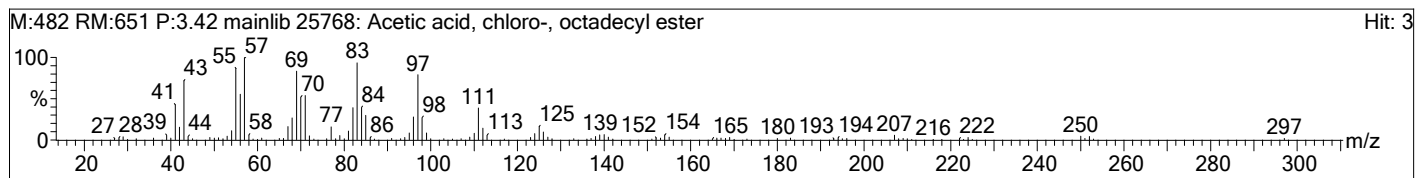

# TAMILNADU AGRICULTURAL UNIVERSITY - AGRICULTURAL MICROBIOLOGY

INSTRUMENT: PERKIN ELMER CLARUS SQ8C  
 INJECTION VOL: 1 MICRO LITER  
 SAMPLE ID : T360

COLOUMN: DB-5 MS CAPILARY STANDARD NON - POLARCOLOUMN  
 DIMENSION: 30Mts, ID: 0.25 mm, FILM: 0.25 IM CARRIER GAS: He

| #  | RT     | Scan | Height    | Area      | Area % | Norm % |
|----|--------|------|-----------|-----------|--------|--------|
| 14 | 20.580 | 3515 | 8,788,383 | 476,165.9 | 0.988  | 12.33  |

| Pk # | RT     | Hit | Compound Name                                | Match | R.Match | Prob. | CAS       | Library |
|------|--------|-----|----------------------------------------------|-------|---------|-------|-----------|---------|
| 14   | 20.580 | 1   | Hexadecanoic acid, methyl ester              | 604   | 877     | 36.8  | 112-39-0  | replib  |
|      |        | 2   | Hexadecanoic acid, methyl ester              | 572   | 811     | 36.8  | 112-39-0  | replib  |
|      |        | 3   | Hexadecanoic acid, methyl ester              | 571   | 713     | 36.8  | 112-39-0  | mainlib |
|      |        | 4   | Pentadecanoic acid, 14-methyl-, methyl ester | 568   | 755     | 9.1   | 5129-60-2 | mainlib |
|      |        | 5   | Hexadecanoic acid, methyl ester              | 565   | 738     | 36.8  | 112-39-0  | replib  |
|      |        | 6   | Hexadecanoic acid, methyl ester              | 558   | 727     | 36.8  | 112-39-0  | replib  |
|      |        | 7   | Methyl tetradecanoate                        | 550   | 737     | 4.7   | 124-10-7  | replib  |
|      |        | 8   | Pentadecanoic acid, 13-methyl-, methyl ester | 546   | 639     | 4.0   | 5487-50-3 | mainlib |
|      |        | 9   | Hexadecanoic acid, methyl ester              | 540   | 671     | 36.8  | 112-39-0  | replib  |
|      |        | 10  | Pentadecanoic acid, methyl ester             | 537   | 721     | 2.9   | 7132-64-1 | replib  |

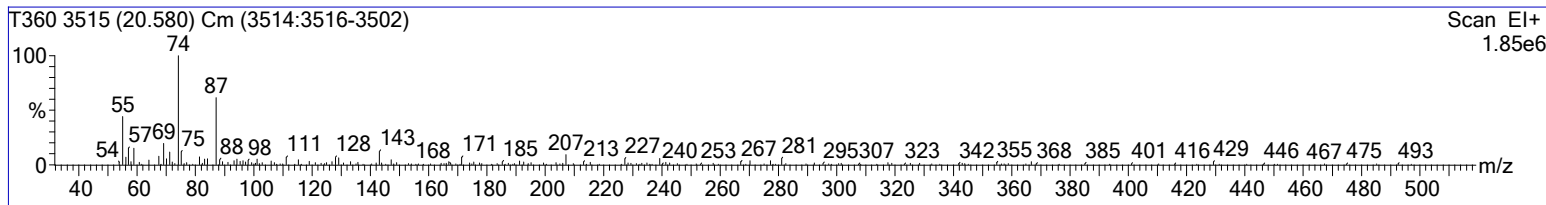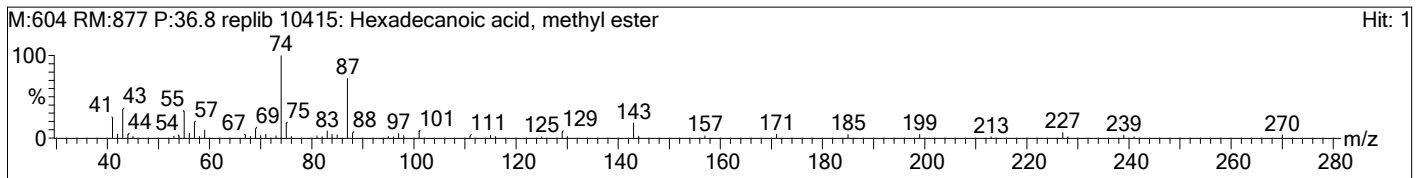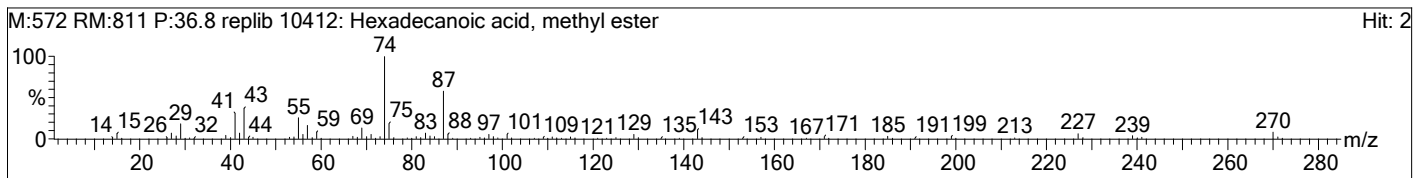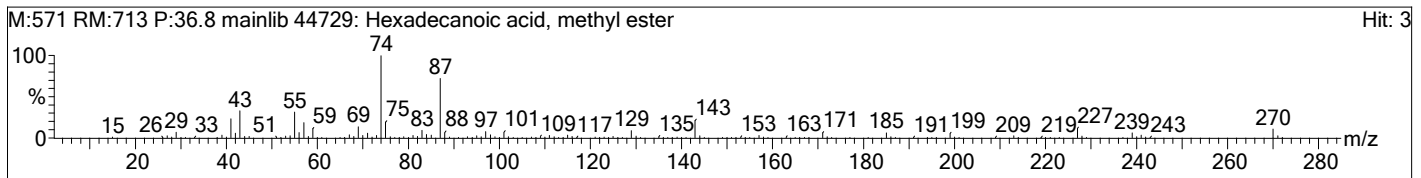

# TAMILNADU AGRICULTURAL UNIVERSITY - AGRICULTURAL MICROBIOLOGY

INSTRUMENT: PERKIN ELMER CLARUS SQ8C  
 INJECTION VOL: 1 MICRO LITER  
 SAMPLE ID : T360

COLOUMN: DB-5 MS CAPILARY STANDARD NON - POLARCOLOUMN  
 DIMENSION: 30Mts, ID: 0.25 mm, FILM: 0.25 IM CARRIER GAS: He

| #  | RT     | Scan | Height    | Area      | Area % | Norm % |
|----|--------|------|-----------|-----------|--------|--------|
| 15 | 21.601 | 3719 | 2,456,240 | 115,275.5 | 0.239  | 2.99   |

| PK # | RT     | Hit | Compound Name                                                     | Match | R.Match | Prob. | CAS        | Library |
|------|--------|-----|-------------------------------------------------------------------|-------|---------|-------|------------|---------|
| 15   | 21.601 | 1   | 2-Nonadecanone 2,4-dinitrophenylhydrazine                         | 377   | 420     | 7.8   | 28813-61-8 | mainlib |
|      |        | 2   | Androsta-3,5-dien-3-ol, 17-acetyl-3-O-(t-butylidimethylsilyl)-    | 375   | 493     | 7.2   | 99647-01-5 | replib  |
|      |        | 3   | Norgestrel, trimethylsilyl ether                                  | 360   | 445     | 4.4   |            | mainlib |
|      |        | 4   | .psi.,.psi.-Carotene, 3,4-didehydro-1,2-dihydro-1-methoxy-        | 358   | 385     | 4.0   | 5085-16-5  | mainlib |
|      |        | 5   | (+)-Prostaglandin F2à, 4TMS derivative                            | 358   | 383     | 4.0   | 50669-95-9 | mainlib |
|      |        | 6   | 11à-Hydroxyprogesterone, trimethylsilyl ether, bis(O-methyloxime) | 345   | 359     | 2.6   |            | mainlib |
|      |        | 7   | 3-Heptafluorobutyriloxy-3,5,10-pregnatrien-20-one                 | 344   | 432     | 2.5   |            | mainlib |
|      |        | 8   | (+)-Prostaglandin F2à, 4TMS derivative                            | 342   | 358     | 2.3   | 50669-96-0 | mainlib |
|      |        | 9   | 3,9-Epoxypregnan-14-ol-20-one, 3,11,18-triacetoxy-                | 340   | 361     | 2.1   |            | mainlib |
|      |        | 10  | 4,4,6a,6b,8a,11,11,14b-Octamethyl-docosahydropicen-3-ol           | 338   | 377     | 2.0   |            | mainlib |

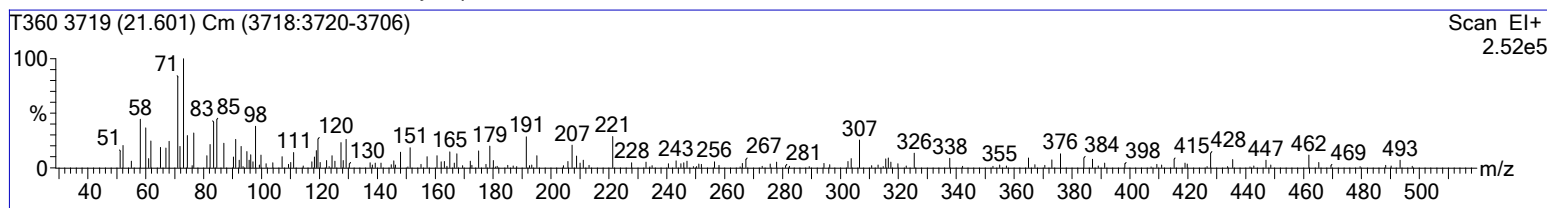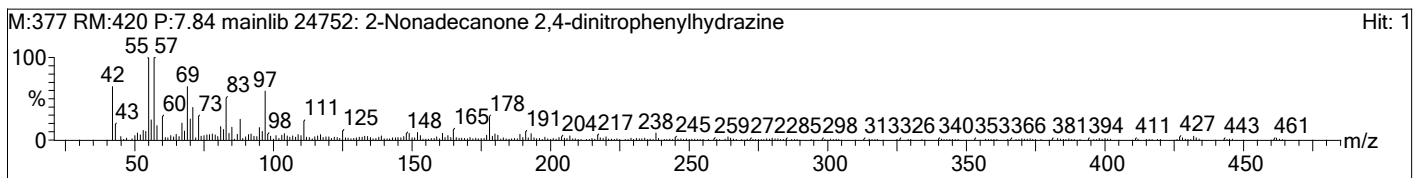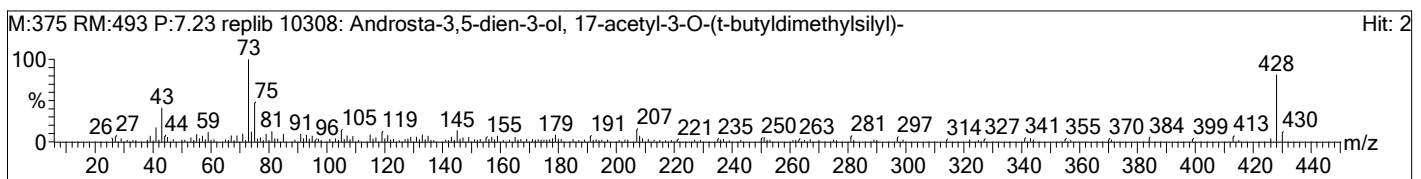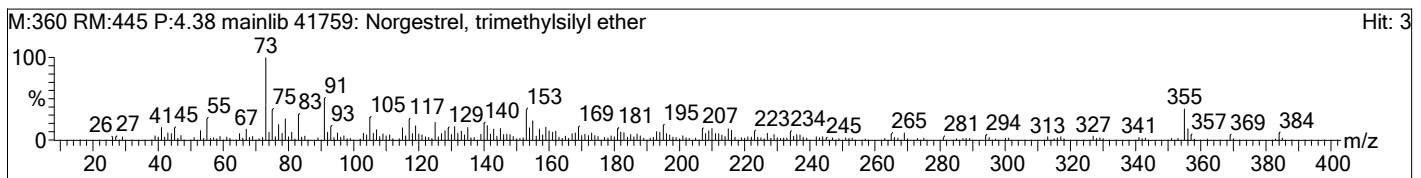

# TAMILNADU AGRICULTURAL UNIVERSITY - AGRICULTURAL MICROBIOLOGY

INSTRUMENT: PERKIN ELMER CLARUS SQ8C  
 INJECTION VOL: 1 MICRO LITER  
 SAMPLE ID : T360

COLOUMN: DB-5 MS CAPILARY STANDARD NON - POLARCOLOUMN  
 DIMENSION: 30Mts, ID: 0.25 mm, FILM: 0.25 IM CARRIER GAS: He

| #  | RT     | Scan | Height    | Area      | Area % | Norm % |
|----|--------|------|-----------|-----------|--------|--------|
| 16 | 24.012 | 4201 | 3,762,189 | 122,604.3 | 0.254  | 3.18   |

| PK # | RT     | Hit | Compound Name                                           | Match | R.Match | Prob. | CAS        | Library |
|------|--------|-----|---------------------------------------------------------|-------|---------|-------|------------|---------|
| 16   | 24.012 | 1   | 9-Octadecene, 1,1'-[1,2-ethanediylbis(oxy)]bis-, (Z,Z)- | 414   | 454     | 8.7   | 17367-13-4 | mainlib |
|      |        | 2   | Oxiranedodecanoic acid, 3-octyl-, cis-                  | 403   | 458     | 5.9   | 3420-36-8  | mainlib |
|      |        | 3   | trans-Traumatic acid                                    | 401   | 529     | 5.5   | 6402-36-4  | mainlib |
|      |        | 4   | 8-Octadecenal                                           | 392   | 462     | 4.0   | 56554-94-0 | mainlib |
|      |        | 5   | 9-Octadecene, 1-[2-(octadecyloxy)ethoxy]-               | 392   | 429     | 4.0   | 56599-41-8 | mainlib |
|      |        | 6   | 2-Adamantanol, 6,6-ethylenedioxy-                       | 391   | 512     | 3.8   |            | mainlib |
|      |        | 7   | Octadecanoic acid, 3-hydroxy-, methyl ester             | 391   | 484     | 3.8   | 2420-36-2  | replib  |
|      |        | 8   | Eicosane, 2-cyclohexyl-                                 | 385   | 445     | 3.0   | 4443-56-5  | mainlib |
|      |        | 9   | Octadecanoic acid, 9-octadecenyl ester, (Z)-            | 384   | 417     | 2.9   | 17673-50-6 | mainlib |
|      |        | 10  | 1,8,15,22-Tetraaza-2,7,16,21-cyclooctacosanetetrone     | 384   | 396     | 2.9   | 4238-35-1  | mainlib |

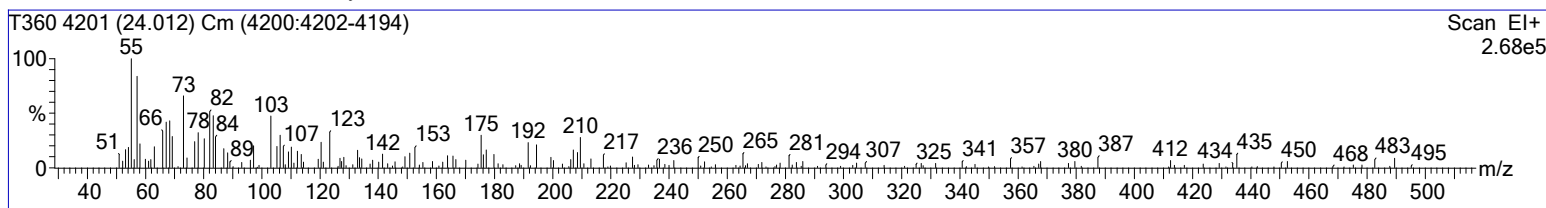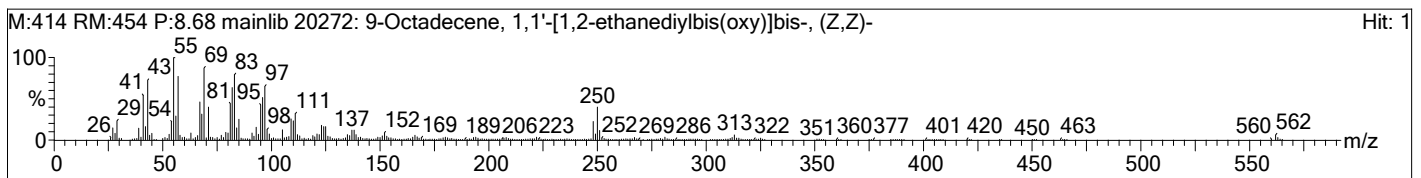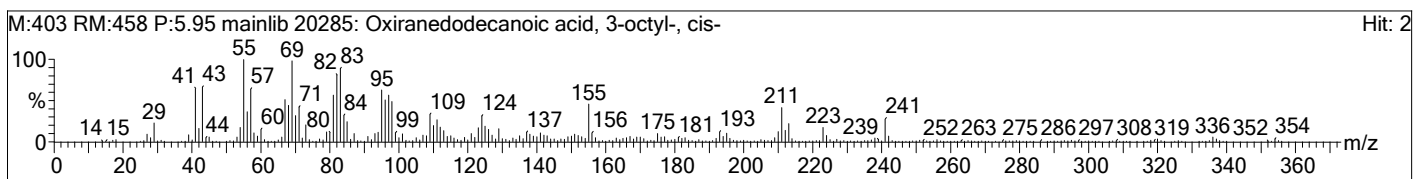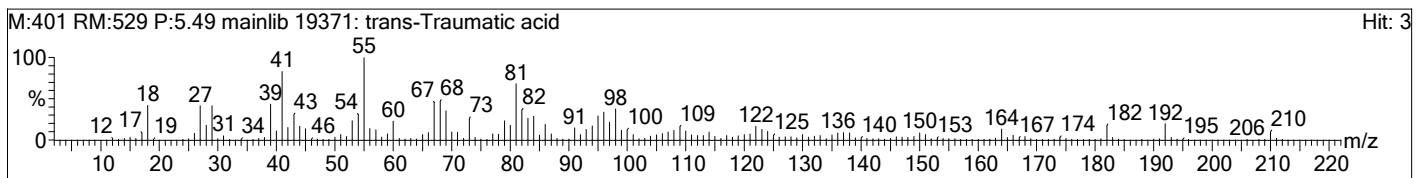



# TAMILNADU AGRICULTURAL UNIVERSITY - AGRICULTURAL MICROBIOLOGY

INSTRUMENT: PERKIN ELMER CLARUS SQ8C  
 INJECTION VOL: 1 MICRO LITER  
 SAMPLE ID : T360

COLOUMN: DB-5 MS CAPILARY STANDARD NON - POLARCOLOUMN  
 DIMENSION: 30Mts, ID: 0.25 mm, FILM: 0.25 IM CARRIER GAS: He

| #  | RT     | Scan | Height     | Area      | Area % | Norm % |
|----|--------|------|------------|-----------|--------|--------|
| 17 | 24.347 | 4268 | 12,905,212 | 541,816.2 | 1.124  | 14.03  |

| Pk # | RT     | Hit | Compound Name                                | Match | R.Match | Prob. | CAS        | Library |
|------|--------|-----|----------------------------------------------|-------|---------|-------|------------|---------|
| 17   | 24.347 | 1   | Heptadecanoic acid, 16-methyl-, methyl ester | 641   | 719     | 30.3  | 5129-61-3  | mainlib |
|      |        | 2   | Methyl stearate                              | 637   | 767     | 25.6  | 112-61-8   | replib  |
|      |        | 3   | Methyl stearate                              | 636   | 748     | 25.6  | 112-61-8   | replib  |
|      |        | 4   | Methyl stearate                              | 635   | 844     | 25.6  | 112-61-8   | replib  |
|      |        | 5   | Methyl stearate                              | 634   | 753     | 25.6  | 112-61-8   | replib  |
|      |        | 6   | Methyl stearate                              | 629   | 727     | 25.6  | 112-61-8   | mainlib |
|      |        | 7   | Methyl stearate                              | 628   | 799     | 25.6  | 112-61-8   | replib  |
|      |        | 8   | Heptadecanoic acid, 16-methyl-, methyl ester | 616   | 704     | 30.3  | 5129-61-3  | replib  |
|      |        | 9   | Heptadecanoic acid, 16-methyl-, methyl ester | 613   | 744     | 30.3  | 5129-61-3  | replib  |
|      |        | 10  | Heptadecanoic acid, 15-methyl-, methyl ester | 594   | 657     | 5.7   | 54833-55-5 | mainlib |

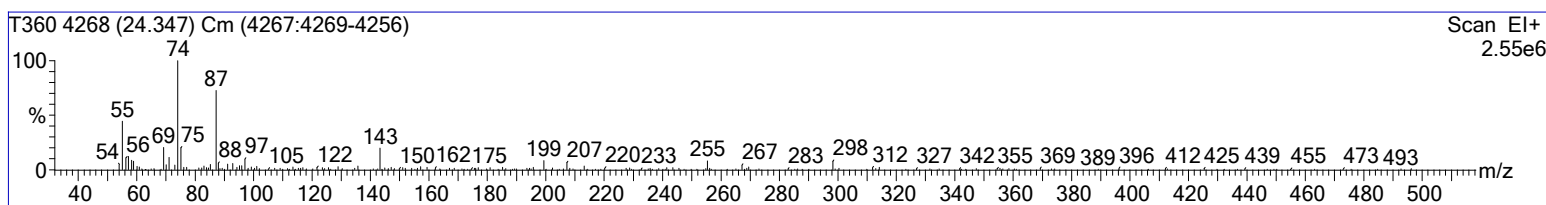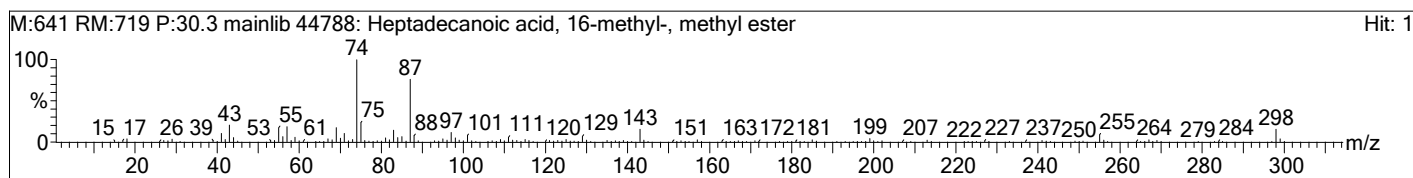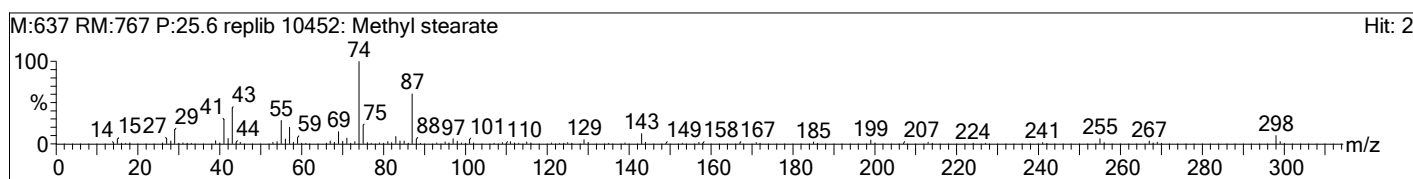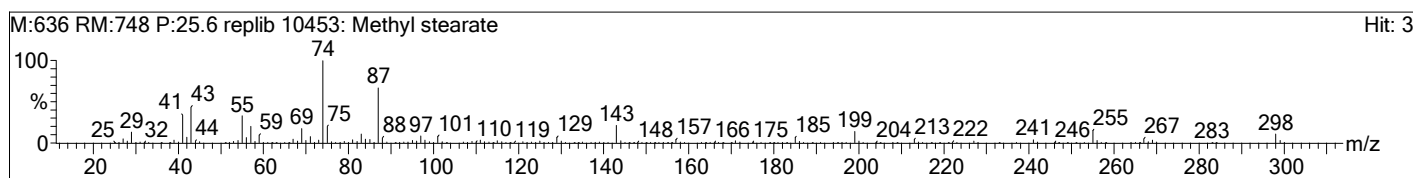

# TAMILNADU AGRICULTURAL UNIVERSITY - AGRICULTURAL MICROBIOLOGY

INSTRUMENT: PERKIN ELMER CLARUS SQ8C  
 INJECTION VOL: 1 MICRO LITER  
 SAMPLE ID : T360

COLOUMN: DB-5 MS CAPILARY STANDARD NON - POLARCOLOUMN  
 DIMENSION: 30Mts, ID: 0.25 mm, FILM: 0.25 IM CARRIER GAS: He

| #  | RT     | Scan | Height    | Area      | Area % | Norm % |
|----|--------|------|-----------|-----------|--------|--------|
| 18 | 27.958 | 4990 | 2,718,104 | 127,913.2 | 0.265  | 3.31   |

| Pk # | RT     | Hit | Compound Name                                                                                                         | Match | R.Match | Prob. | CAS         | Library |
|------|--------|-----|-----------------------------------------------------------------------------------------------------------------------|-------|---------|-------|-------------|---------|
| 18   | 27.958 | 1   | (4,4-Diphenyl-butyl)-(3-phenyl-piperidin-4-yl)-amine                                                                  | 412   | 465     | 9.8   |             | mainlib |
|      |        | 2   | 2-(2-Azepan-1-yl-2-oxoethyl)-1-hydroxy-1-phenyl-octahydro-pyrido[1,2-a]azepin-4-one                                   | 404   | 483     | 7.3   |             | mainlib |
|      |        | 3   | Isodemecolcine, N-desmethyl-                                                                                          | 390   | 442     | 4.6   | 102419-92-1 | replib  |
|      |        | 4   | Morphinan-4,5-epoxy-3,6-di-ol, 6-[7-nitrobenzofurazan-4-yl]amino-                                                     | 388   | 459     | 4.2   |             | mainlib |
|      |        | 5   | 6,19-Cycloandrostande-3,7-diol, 3á-methoxy-                                                                           | 375   | 439     | 2.7   |             | mainlib |
|      |        | 6   | Stigmastane-3,6-dione, (5à)-                                                                                          | 374   | 455     | 2.6   | 22149-69-5  | mainlib |
|      |        | 7   | 5,6,7,8,9,10-Hexahydro-9-methyl-spiro[2H-1,3-benzoxazine-4,1'-cyclohexane]-2-thione                                   | 370   | 457     | 2.2   |             | mainlib |
|      |        | 8   | Pyrrolo[1,2-c][1,3,2]diazaphosphorine-4-carbonitrile, 1,5,6,7-tetrahydro-1-(methylthio)-3-(4-morpholinyl)-, 1-sulfide | 367   | 452     | 2.0   |             | mainlib |
|      |        | 9   | EPPS                                                                                                                  | 367   | 445     | 2.0   | 16052-06-5  | mainlib |
|      |        | 10  | Docosanedioic acid, dimethyl ester                                                                                    | 367   | 417     | 2.0   | 22399-98-0  | replib  |

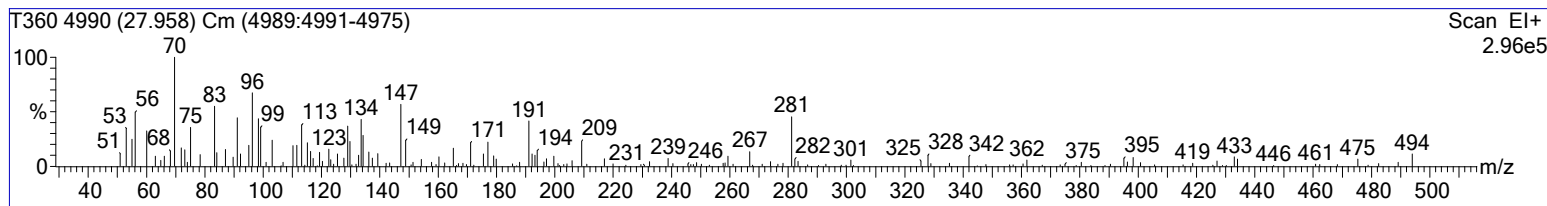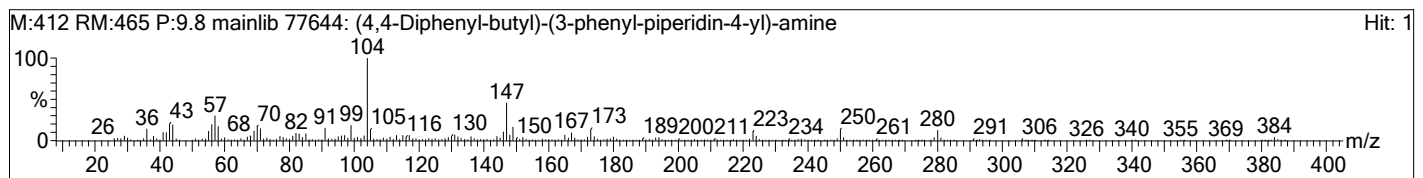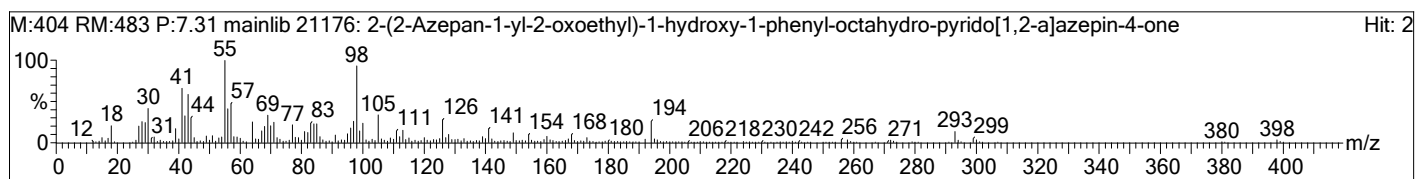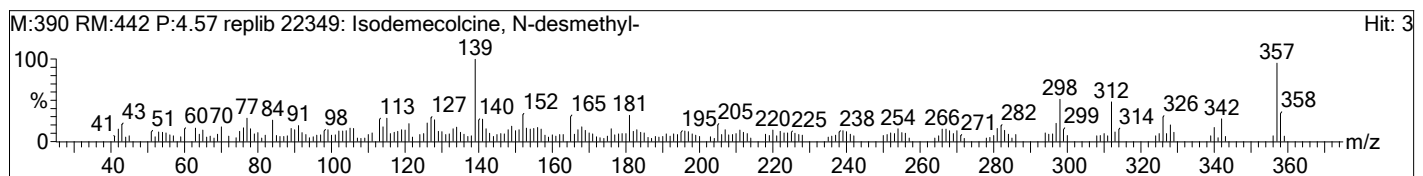

# TAMILNADU AGRICULTURAL UNIVERSITY - AGRICULTURAL MICROBIOLOGY

INSTRUMENT: PERKIN ELMER CLARUS SQ8C  
 INJECTION VOL: 1 MICRO LITER  
 SAMPLE ID : T360

COLOUMN: DB-5 MS CAPILARY STANDARD NON - POLARCOLOUMN  
 DIMENSION: 30Mts, ID: 0.25 mm, FILM: 0.25 IM CARRIER GAS: He

| #  | RT     | Scan | Height    | Area      | Area % | Norm % |
|----|--------|------|-----------|-----------|--------|--------|
| 19 | 28.553 | 5109 | 2,833,343 | 127,570.5 | 0.265  | 3.30   |

| Pk # | RT     | Hit | Compound Name                                                      | Match | R.Match | Prob. | CAS         | Library |
|------|--------|-----|--------------------------------------------------------------------|-------|---------|-------|-------------|---------|
| 19   | 28.553 | 1   | Octadecane, 1-chloro-                                              | 427   | 544     | 8.3   | 3386-33-2   | replib  |
|      |        | 2   | 1-Chloroeicosane                                                   | 417   | 499     | 5.9   | 42217-02-7  | mainlib |
|      |        | 3   | 14-Methyl-14-(3-oxobutyryloxy)-hexadec-15-enoic acid, methyl ester | 412   | 479     | 4.7   |             | mainlib |
|      |        | 4   | Perhydro-2-oxo-3-stearoylfuran                                     | 410   | 450     | 4.4   | 62972-55-8  | mainlib |
|      |        | 5   | 1,18-Nonadecadien-7,10-dione                                       | 409   | 493     | 4.2   | 100594-89-6 | mainlib |
|      |        | 6   | Ethanol, 2-(octadecyloxy)-                                         | 409   | 467     | 4.2   | 2136-72-3   | mainlib |
|      |        | 7   | Octadecane, 3-ethyl-5-(2-ethylbutyl)-                              | 408   | 430     | 4.0   | 55282-12-7  | mainlib |
|      |        | 8   | 2-Hydroxy-1,1,10-trimethyl-6,9-epidioxydecalin                     | 406   | 514     | 3.7   | 108511-85-9 | mainlib |
|      |        | 9   | 1,2-15,16-Diepoxyhexadecane                                        | 402   | 505     | 3.1   |             | mainlib |
|      |        | 10  | Behenyl chloride                                                   | 402   | 485     | 3.1   | 42217-03-8  | mainlib |

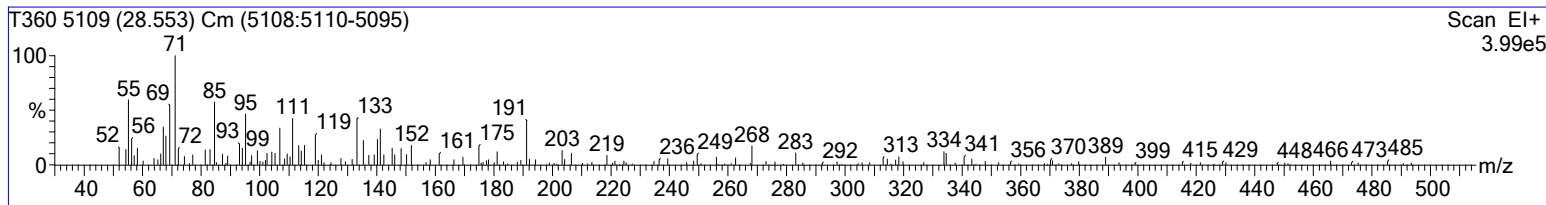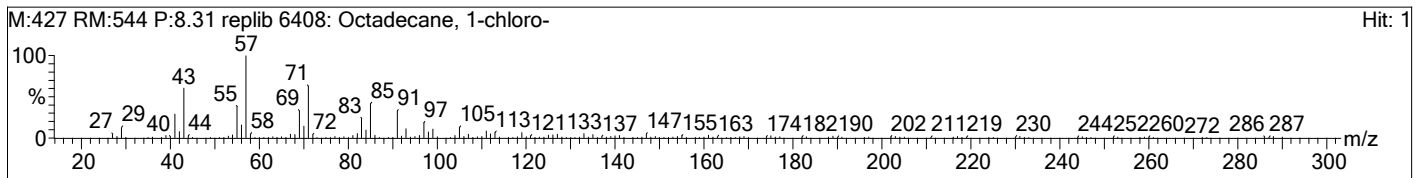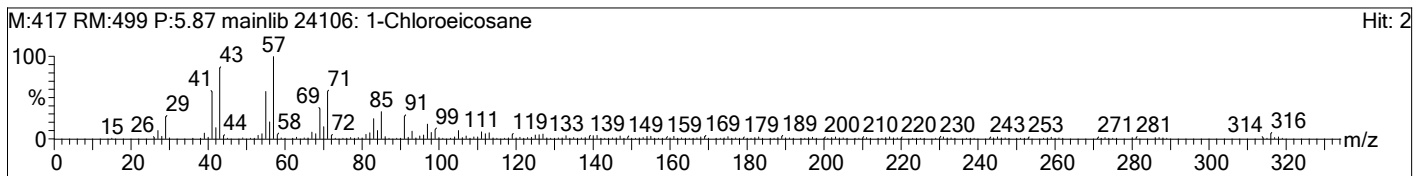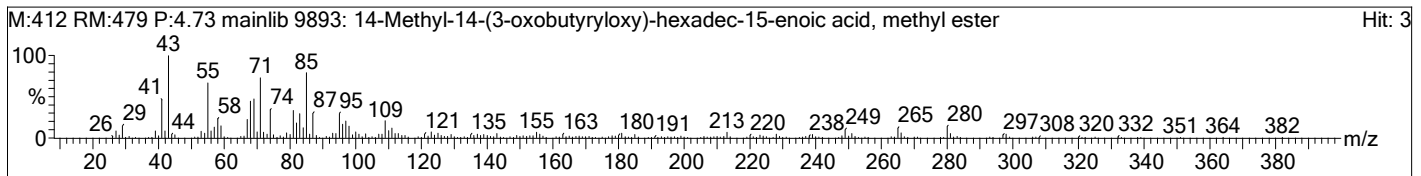

# TAMILNADU AGRICULTURAL UNIVERSITY - AGRICULTURAL MICROBIOLOGY

INSTRUMENT: PERKIN ELMER CLARUS SQ8C  
 INJECTION VOL: 1 MICRO LITER  
 SAMPLE ID : T360

COLOUMN: DB-5 MS CAPILARY STANDARD NON - POLARCOLOUMN  
 DIMENSION: 30Mts, ID: 0.25 mm, FILM: 0.25 IM CARRIER GAS: He

| #  | RT     | Scan | Height    | Area      | Area % | Norm % |
|----|--------|------|-----------|-----------|--------|--------|
| 20 | 29.854 | 5369 | 3,913,030 | 168,985.1 | 0.351  | 4.38   |

| Pk # | RT     | Hit | Compound Name                             | Match | R.Match | Prob. | CAS        | Library |
|------|--------|-----|-------------------------------------------|-------|---------|-------|------------|---------|
| 20   | 29.854 | 1   | 17-Pentatriacontene                       | 408   | 435     | 6.3   | 6971-40-0  | mainlib |
|      |        | 2   | Oleic acid, eicosyl ester                 | 404   | 430     | 5.3   | 22393-88-0 | mainlib |
|      |        | 3   | 17-Pentatriacontene                       | 388   | 463     | 6.3   | 6971-40-0  | replib  |
|      |        | 4   | cis-11-Eicosenoic acid                    | 387   | 462     | 2.9   | 5561-99-9  | mainlib |
|      |        | 5   | Spirostan-9-ol, 3-amino-, (3á,5à,25R)-    | 384   | 449     | 2.6   | 16577-35-8 | mainlib |
|      |        | 6   | 2,5-Furandione, dihydro-3-octadecyl-      | 383   | 450     | 2.5   | 47458-32-2 | mainlib |
|      |        | 7   | 1-Hexacosanol                             | 382   | 419     | 2.4   | 506-52-5   | replib  |
|      |        | 8   | 9-Octadecenoic acid (Z)-, hexadecyl ester | 380   | 429     | 2.2   | 22393-86-8 | mainlib |
|      |        | 9   | 2-Nonadecanone 2,4-dinitrophenylhydrazine | 380   | 424     | 2.2   | 28813-61-8 | mainlib |
|      |        | 10  | Oleic acid, 3-(octadecyloxy)propyl ester  | 379   | 445     | 2.1   | 17367-41-8 | mainlib |

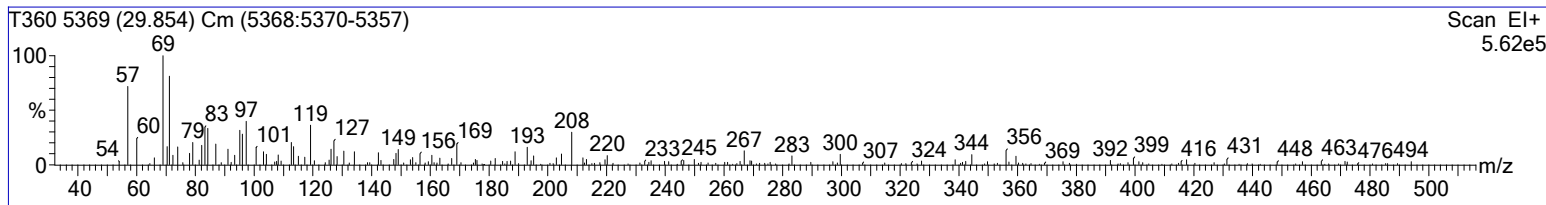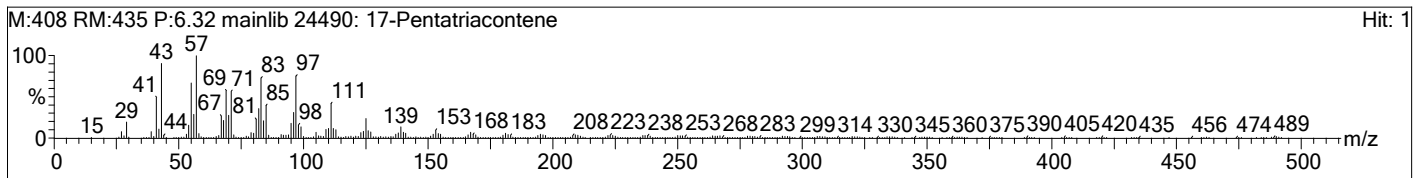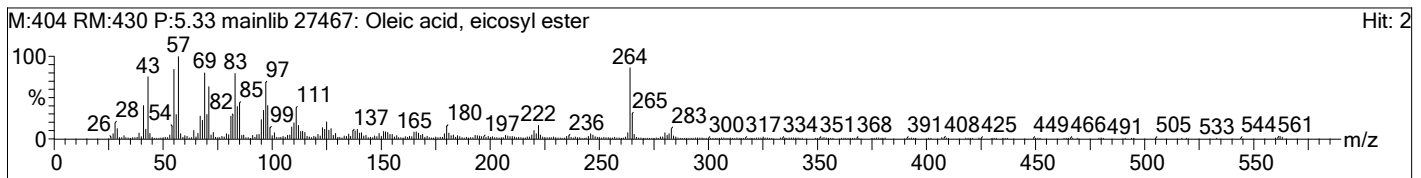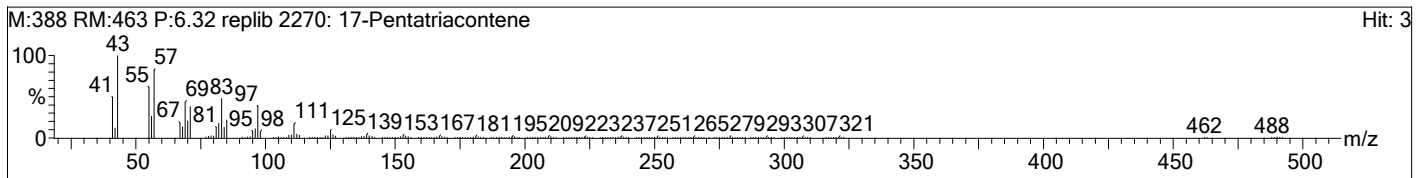

# TAMILNADU AGRICULTURAL UNIVERSITY - AGRICULTURAL MICROBIOLOGY

INSTRUMENT: PERKIN ELMER CLARUS SQ8C  
 INJECTION VOL: 1 MICRO LITER  
 SAMPLE ID : T360

COLOUMN: DB-5 MS CAPILARY STANDARD NON - POLARCOLOUMN  
 DIMENSION: 30Mts, ID: 0.25 mm, FILM: 0.25 IM CARRIER GAS: He

| #  | RT     | Scan | Height    | Area      | Area % | Norm % |
|----|--------|------|-----------|-----------|--------|--------|
| 21 | 30.064 | 5411 | 6,108,846 | 143,558.7 | 0.298  | 3.72   |

| PK # | RT     | Hit | Compound Name                                                                                  | Match | R.Match | Prob. | CAS        | Library |
|------|--------|-----|------------------------------------------------------------------------------------------------|-------|---------|-------|------------|---------|
| 21   | 30.064 | 1   | 3-Isopropyl-6a,10b-dimethyl-8-(2-oxo-2-phenyl-ethyl)-dodecahydro-benzo[f]chromen-7-one         | 453   | 491     | 16.9  |            | mainlib |
|      |        | 2   | Sulfide, bis(2-cyano-3,4-dihydro-2,3,3-trimethyl-2H-pyrrol-5-yl)-                              | 430   | 500     | 6.2   |            | mainlib |
|      |        | 3   | Rhodopin                                                                                       | 420   | 426     | 4.3   | 105-92-0   | mainlib |
|      |        | 4   | 2-Picenol, 4,4,6a,6b,8a,11,11,14b-octamethylperhydro                                           | 411   | 429     | 3.2   |            | mainlib |
|      |        | 5   | (2R,3R,4aR,5S,8aS)-2-Hydroxy-4a,5-dimethyl-3-(prop-1-en-2-yl)octahydronaphthalen-1(2H)-one     | 410   | 504     | 3.0   | 66884-74-0 | mainlib |
|      |        | 6   | 1-Benzazirene-1-carboxylic acid, 2,2,5a-trimethyl-1a-[3-oxo-1-butenyl] perhydro-, methyl ester | 408   | 488     | 2.8   |            | mainlib |
|      |        | 7   | Cyclobutane, 1,3-bis[2-(2-isopropyl-3,3-dimethylloxiran-2-yl)ethenyl]-2,4-diacetyl-            | 408   | 435     | 2.8   | 70373-02-3 | mainlib |
|      |        | 8   | .psi.,.psi.-Carotene, 1,1',2,2'-tetrahydro-1,1'-dimethoxy-                                     | 408   | 408     | 2.8   | 13833-01-7 | mainlib |
|      |        | 9   | Corynan-17-ol, 18,19-didehydro-10-methoxy-, acetate (ester)                                    | 405   | 442     | 2.5   | 56053-13-5 | mainlib |
|      |        | 10  | 6-Chloro-1-ethyl-4-oxoquinoline-3-carboxylic acid                                              | 403   | 544     | 2.3   | 66176-24-7 | mainlib |

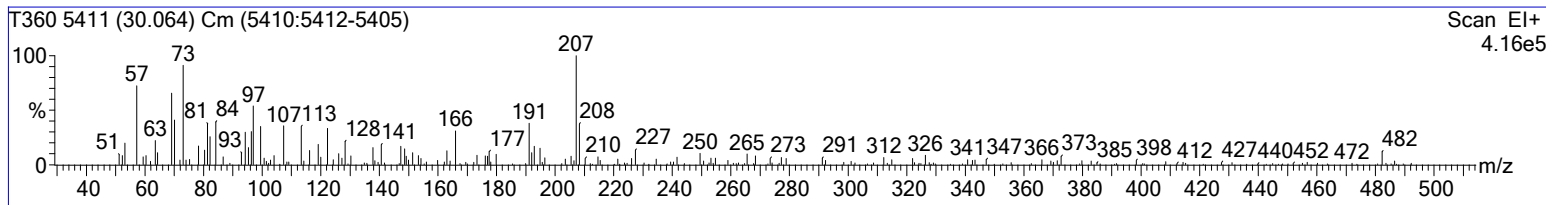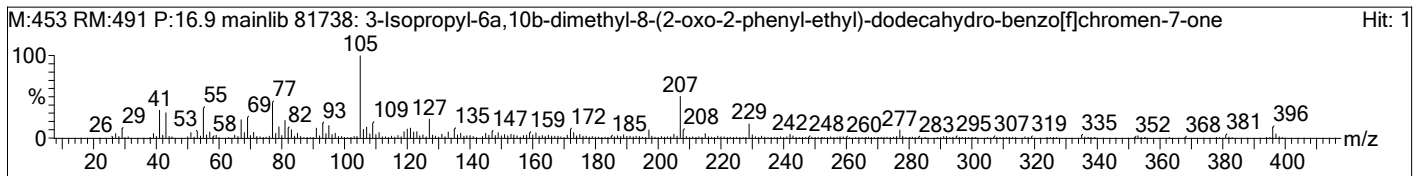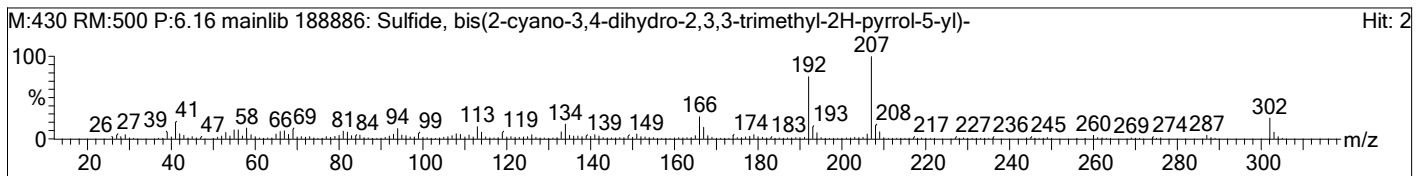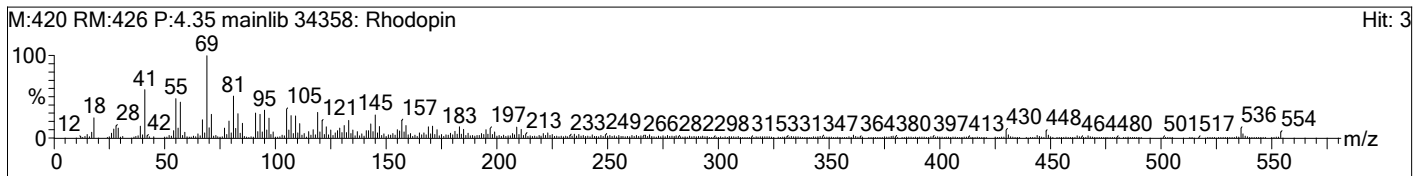

# TAMILNADU AGRICULTURAL UNIVERSITY - AGRICULTURAL MICROBIOLOGY

INSTRUMENT: PERKIN ELMER CLARUS SQ8C  
 INJECTION VOL: 1 MICRO LITER  
 SAMPLE ID : T360

COLOUMN: DB-5 MS CAPILARY STANDARD NON - POLARCOLOUMN  
 DIMENSION: 30Mts, ID: 0.25 mm, FILM: 0.25 IM CARRIER GAS: He

| #  | RT     | Scan | Height    | Area      | Area % | Norm % |
|----|--------|------|-----------|-----------|--------|--------|
| 22 | 30.699 | 5538 | 3,934,182 | 186,010.6 | 0.386  | 4.82   |

| Pk # | RT     | Hit | Compound Name                                                                                                                                      | Match | R.Match | Prob. | CAS         | Library   |
|------|--------|-----|----------------------------------------------------------------------------------------------------------------------------------------------------|-------|---------|-------|-------------|-----------|
| 22   | 30.699 | 1   | 2-Chloroadenosine                                                                                                                                  | 444   | 746     | 19.6  | 146-77-0    | nist_msms |
|      |        | 2   | 7,7,9,9,11,11-Hexamethyl-3,6,8,10,12,15-hexaoxa-7,9,11-trisilaheptadecane                                                                          | 409   | 513     | 4.9   |             | mainlib   |
|      |        | 3   | 6-Amino-5-cyano-4-(5-cyano-2,4-dimethyl-1H-pyrrol-3-yl)-2-methyl-4H-pyran-3-carboxylic acid ethyl ester                                            | 402   | 466     | 3.8   |             | mainlib   |
|      |        | 4   | 1,2-Benzisothiazol-3-amine, TBDMS derivative                                                                                                       | 396   | 534     | 3.0   |             | mainlib   |
|      |        | 5   | 6-Methoxypurine, TBDMS derivative                                                                                                                  | 394   | 506     | 2.7   |             | mainlib   |
|      |        | 6   | 4-Hydroxychalcone                                                                                                                                  | 390   | 777     | 2.3   | 20426-12-4  | nist_msms |
|      |        | 7   | 2-Oxa-4-azabicyclo[4.2.0]octa-3,7-diene-6-carboxylic acid, 1,7,8-tris(1,1-dimethylethyl)-3-(2,2-dimethylpropyl)-5-phenyl-, 1,1-dimethylethyl ester | 390   | 438     | 2.3   | 101160-38-7 | mainlib   |
|      |        | 8   | 4'-Hydroxychalcone                                                                                                                                 | 387   | 769     | 2.0   | 2657-25-2   | nist_msms |
|      |        | 9   | à-N-Normethadol                                                                                                                                    | 387   | 437     | 2.0   | 38455-85-5  | mainlib   |
|      |        | 10  | Demecolcine                                                                                                                                        | 386   | 420     | 2.0   | 477-30-5    | mainlib   |

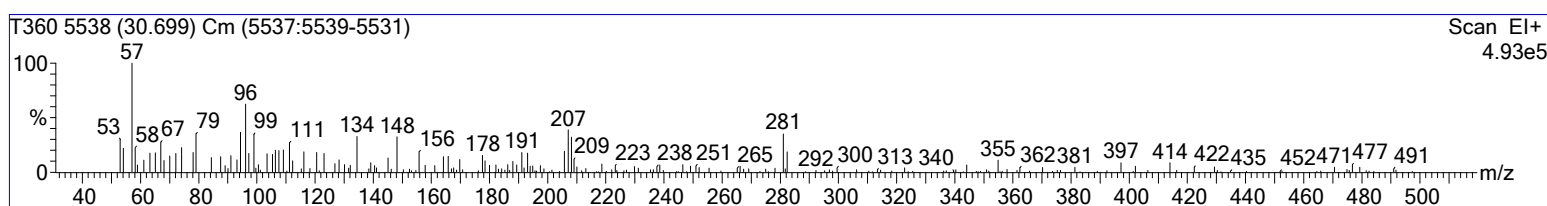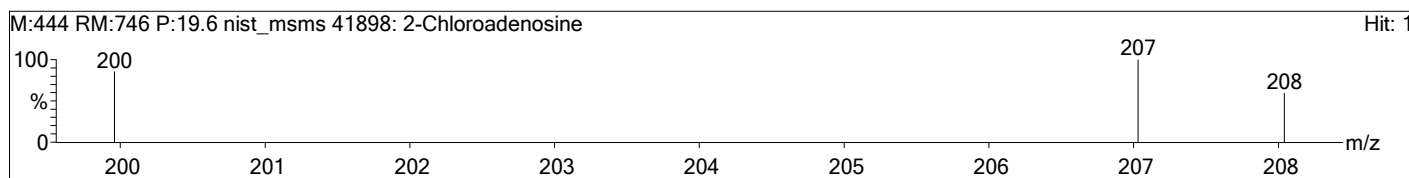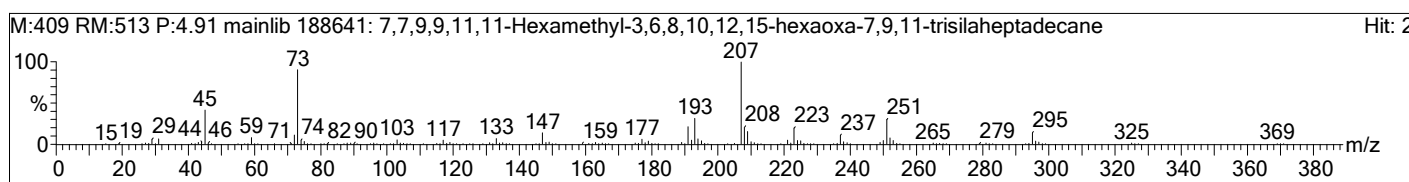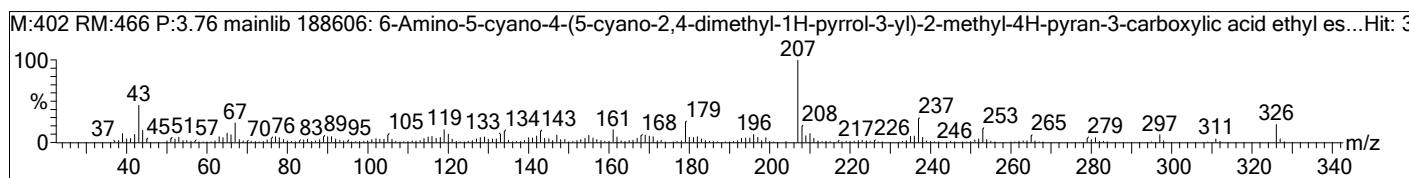

# TAMILNADU AGRICULTURAL UNIVERSITY - AGRICULTURAL MICROBIOLOGY

INSTRUMENT: PERKIN ELMER CLARUS SQ8C  
 INJECTION VOL: 1 MICRO LITER  
 SAMPLE ID : T360

COLOUMN: DB-5 MS CAPILARY STANDARD NON - POLARCOLOUMN  
 DIMENSION: 30Mts, ID: 0.25 mm, FILM: 0.25 IM CARRIER GAS: He

| #  | RT     | Scan | Height    | Area      | Area % | Norm % |
|----|--------|------|-----------|-----------|--------|--------|
| 23 | 31.155 | 5629 | 4,491,160 | 155,678.0 | 0.323  | 4.03   |

| Pk # | RT     | Hit | Compound Name                                                                            | Match | R.Match | Prob. | CAS          | Library |
|------|--------|-----|------------------------------------------------------------------------------------------|-------|---------|-------|--------------|---------|
| 23   | 31.155 | 1   | 7,8-Epoxy lanostan-11-ol, 3-acetoxy-                                                     | 437   | 440     | 17.3  |              | mainlib |
|      |        | 2   | 1-Heptatriacotanol                                                                       | 421   | 501     | 10.0  | 105794-58-9  | mainlib |
|      |        | 3   | Rhodopin                                                                                 | 420   | 423     | 9.6   | 105-92-0     | mainlib |
|      |        | 4   | 17-(1,5-Dimethylhexyl)-10,13-dimethylhexadecahydrocyclopenta[a]phenanthren e-3,5,6-triol | 400   | 429     | 4.4   | 115510-05-9  | mainlib |
|      |        | 5   | Cholestane, 3,5-dichloro-6-nitro-, (3á,5à,6á)-                                           | 399   | 404     | 4.2   | 15505-92-7   | mainlib |
|      |        | 6   | Docosanedioic acid, dimethyl ester                                                       | 398   | 463     | 4.0   | 22399-98-0   | replib  |
|      |        | 7   | Z-10-Methyl-11-tetradecen-1-ol propionate                                                | 396   | 469     | 3.7   |              | mainlib |
|      |        | 8   | Boroxin, tris(2,3-dimethylbut-2-yl)-                                                     | 390   | 458     | 2.9   | 169695-37-8  | mainlib |
|      |        | 9   | Cholest-5-en-3-ol, 6-nitro-, acetate (ester), (3á)-                                      | 389   | 437     | 2.8   | 1912-54-5    | replib  |
|      |        | 10  | 9,19-Cyclolanostane-3,7-diol                                                             | 382   | 394     | 2.2   | 1036383-94-4 | mainlib |

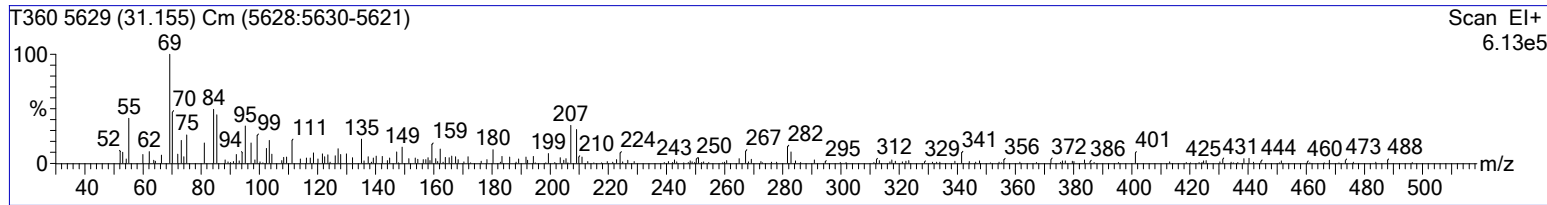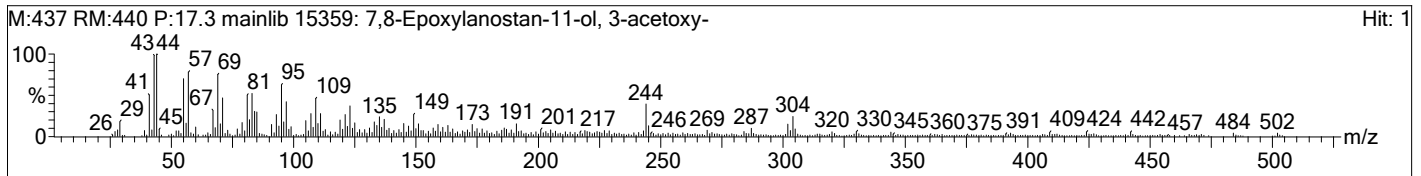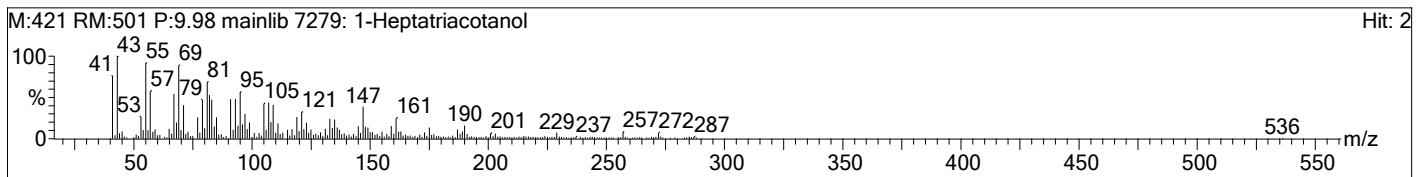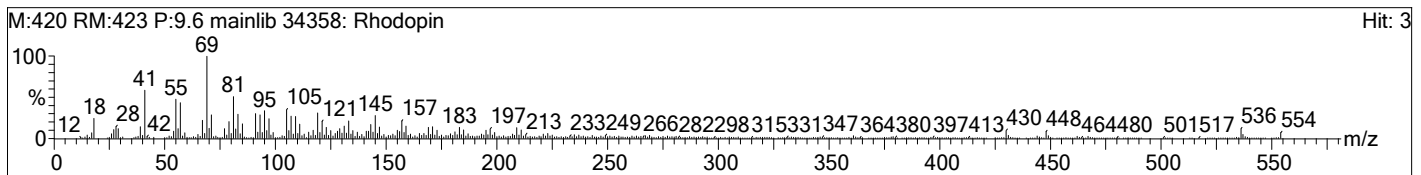

# TAMILNADU AGRICULTURAL UNIVERSITY - AGRICULTURAL MICROBIOLOGY

INSTRUMENT: PERKIN ELMER CLARUS SQ8C  
 INJECTION VOL: 1 MICRO LITER  
 SAMPLE ID : T360

COLOUMN: DB-5 MS CAPILARY STANDARD NON - POLARCOLOUMN  
 DIMENSION: 30Mts, ID: 0.25 mm, FILM: 0.25 IM CARRIER GAS: He

| #  | RT     | Scan | Height    | Area      | Area % | Norm % |
|----|--------|------|-----------|-----------|--------|--------|
| 24 | 31.430 | 5684 | 4,663,358 | 156,456.9 | 0.325  | 4.05   |

| Pk # | RT     | Hit | Compound Name                                                                                                             | Match | R.Match | Prob. | CAS        | Library |
|------|--------|-----|---------------------------------------------------------------------------------------------------------------------------|-------|---------|-------|------------|---------|
| 24   | 31.430 | 1   | Rhodopin                                                                                                                  | 429   | 433     | 16.5  | 105-92-0   | mainlib |
|      |        | 2   | Propanoic acid, 2-(3-acetoxy-4,4,14-trimethylandro-8-en-17-yl)-                                                           | 423   | 443     | 13.0  |            | mainlib |
|      |        | 3   | Glycine, N-[(3 $\alpha$ ,5 $\alpha$ )-24-oxo-3-[(trimethylsilyloxy)chol-24-yl]-, methyl ester                             | 412   | 487     | 8.9   | 57326-15-5 | mainlib |
|      |        | 4   | 11 $\alpha$ -Hydroxyprogesterone, trimethylsilyl ether, bis(O-methyloxime)                                                | 392   | 411     | 4.1   |            | mainlib |
|      |        | 5   | Tibolone, trimethylsilyl ether                                                                                            | 386   | 424     | 3.2   |            | mainlib |
|      |        | 6   | Arachidonoyl ethanolamide                                                                                                 | 385   | 480     | 3.1   | 94421-68-8 | mainlib |
|      |        | 7   | ent-3 $\alpha$ -Acetoxy-10-hydroxy-13-iodomethyl-16-oxo-8,13-epi-17,20-dinorgibberell-1-ene-7,19-dioic acid 19,10-lactone | 376   | 442     | 2.2   |            | mainlib |
|      |        | 8   | Trinexapac-ethyl, TMS derivative                                                                                          | 374   | 437     | 2.0   |            | mainlib |
|      |        | 9   | 2-[3-(4-tert-Butyl-phenoxy)-2-hydroxy-propylsulfanyl]-4,6-dimethyl-nicotinonitrile                                        | 370   | 504     | 1.7   |            | mainlib |
|      |        | 10  | 5 $\alpha$ Androst-16-ol, 17-ethylidene-3,5-dedihydro-6-methoxy-, pivalate                                                | 370   | 462     | 1.7   |            | mainlib |

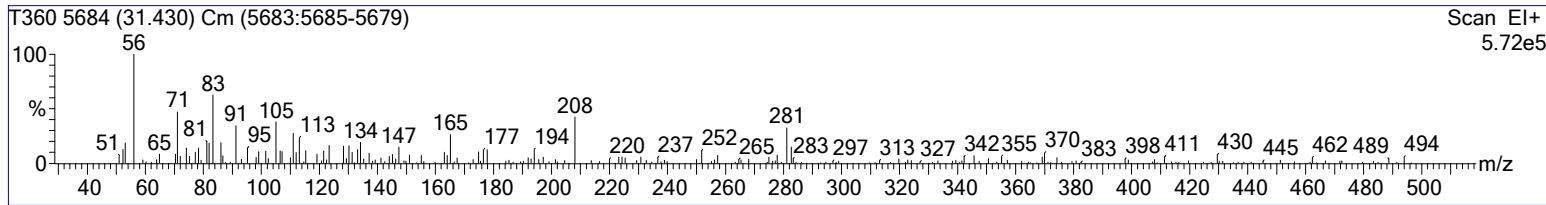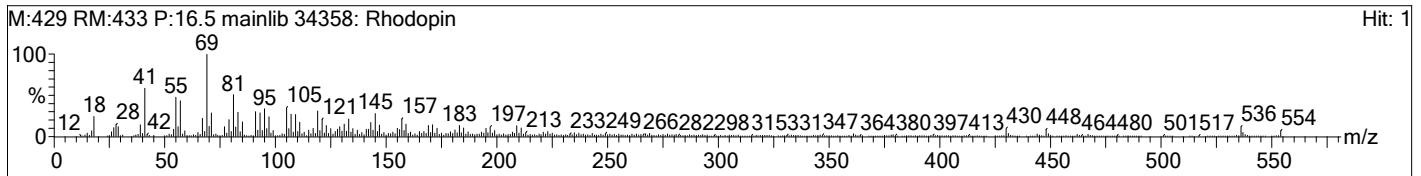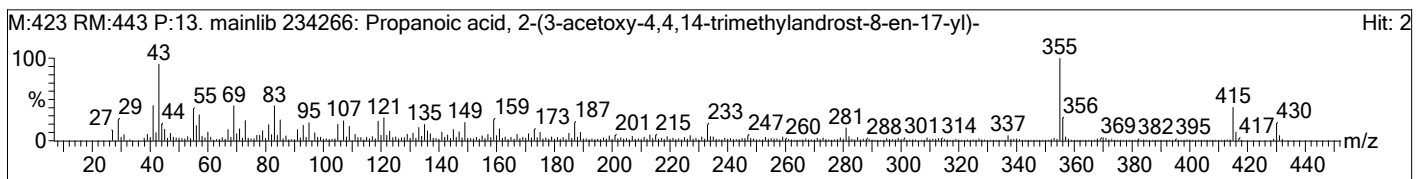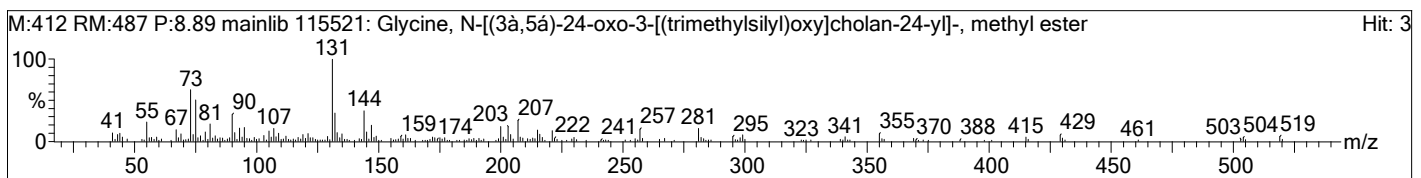



# TAMILNADU AGRICULTURAL UNIVERSITY - AGRICULTURAL MICROBIOLOGY

INSTRUMENT: PERKIN ELMER CLARUS SQ8C  
 INJECTION VOL: 1 MICRO LITER  
 SAMPLE ID : T360

COLOUMN: DB-5 MS CAPILARY STANDARD NON - POLARCOLOUMN  
 DIMENSION: 30Mts, ID: 0.25 mm, FILM: 0.25 IM CARRIER GAS: He

| #  | RT     | Scan | Height    | Area      | Area % | Norm % |
|----|--------|------|-----------|-----------|--------|--------|
| 25 | 31.590 | 5716 | 4,413,812 | 117,499.8 | 0.244  | 3.04   |

| Pk # | RT     | Hit | Compound Name                                                                                                                | Match | R.Match | Prob. | CAS        | Library   |
|------|--------|-----|------------------------------------------------------------------------------------------------------------------------------|-------|---------|-------|------------|-----------|
| 25   | 31.590 | 1   | Glafenin                                                                                                                     | 452   | 789     | 13.0  | 3820-67-5  | nist_msms |
|      |        | 2   | 4-[4-(2-Methoxyphenyl)-1H-pyrazol-3-yl]benzene-1,3-diol                                                                      | 434   | 512     | 6.7   |            | mainlib   |
|      |        | 3   | Staurosporine                                                                                                                | 428   | 753     | 5.3   | 62996-74-1 | nist_msms |
|      |        | 4   | Gibb-3-ene-1,10-dicarboxylic acid, 2,4a-dihydroxy-1-methyl-8-methylene-, 1,4a-lactone, 10-methyl ester, (1à,2á,4aà,4bá,10á)- | 426   | 510     | 4.9   | 5508-47-4  | mainlib   |
|      |        | 5   | 1h-Pyrrole-3,4-diacetic acid, 2-acetoxymethyl-5-methoxycarbonyl-, dimethyl ester                                             | 422   | 477     | 4.1   |            | mainlib   |
|      |        | 6   | Propane-1,1,2,2-tetracarbonitrile, 3-(4-acetyl-2,5-dimethyl-3-furanoyl)-                                                     | 419   | 482     | 3.6   |            | mainlib   |
|      |        | 7   | 2,6-Dihydroxyacetophenone, 2TMS derivative                                                                                   | 416   | 507     | 3.2   |            | mainlib   |
|      |        | 8   | 5-(p-Aminophenyl)-4-(O-tolyl)-2-thiazolamine                                                                                 | 414   | 502     | 3.0   |            | mainlib   |
|      |        | 9   | 2-(4-Chlorophenyl)-5,7-dimethylimidazo[1,2-a]pyridine-8-carbonitrile                                                         | 412   | 530     | 2.7   |            | mainlib   |
|      |        | 10  | Glafenin                                                                                                                     | 410   | 631     | 13.0  | 3820-67-5  | nist_msms |

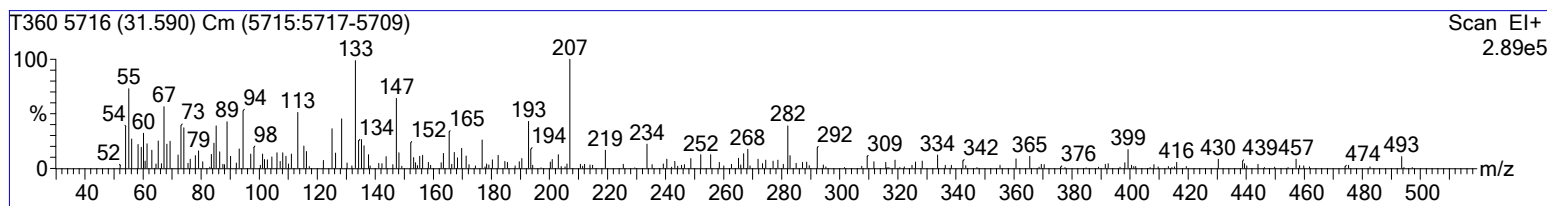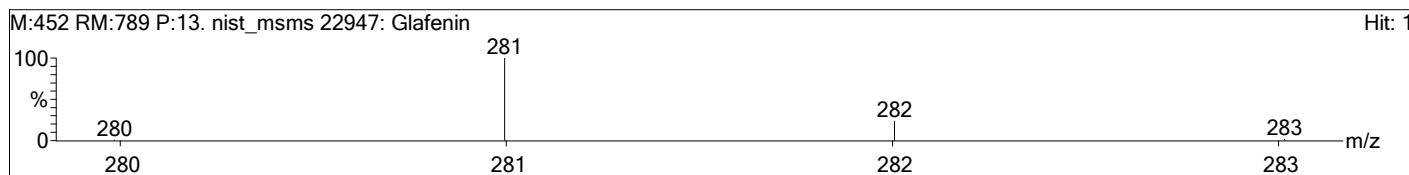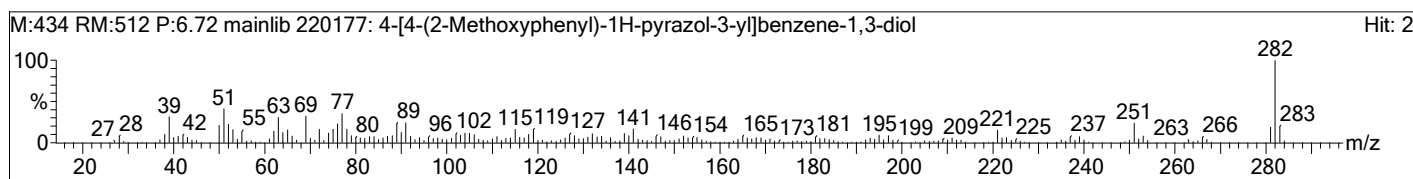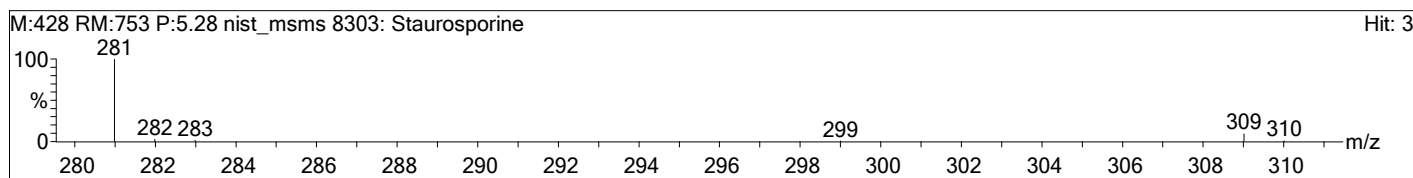

# TAMILNADU AGRICULTURAL UNIVERSITY - AGRICULTURAL MICROBIOLOGY

INSTRUMENT: PERKIN ELMER CLARUS SQ8C  
 INJECTION VOL: 1 MICRO LITER  
 SAMPLE ID : T360

COLOUMN: DB-5 MS CAPILARY STANDARD NON - POLARCOLOUMN  
 DIMENSION: 30Mts, ID: 0.25 mm, FILM: 0.25 IM CARRIER GAS: He

| #  | RT     | Scan | Height    | Area      | Area % | Norm % |
|----|--------|------|-----------|-----------|--------|--------|
| 26 | 31.635 | 5725 | 5,936,416 | 142,236.8 | 0.295  | 3.68   |

| PK # | RT     | Hit | Compound Name                                                                                                                                                       | Match | R.Match | Prob. | CAS         | Library |
|------|--------|-----|---------------------------------------------------------------------------------------------------------------------------------------------------------------------|-------|---------|-------|-------------|---------|
| 26   | 31.635 | 1   | 6-Azacholest-4-en-7-one, 6-benzyl-3 $\beta$ -hydroxy-                                                                                                               | 400   | 412     | 15.4  | 17373-01-2  | mainlib |
|      |        | 2   | 3-[3-(1,5-Dimethylhexyl)-7-(2-hydroxy-1-methylethyl)-3a,6,9b-trimethyl-2,3,3a,4,5,6,7,8,9,9b-decahydro-1H-cyclopenta[a]naphthalen-6-yl]propanoic acid, methyl ester | 387   | 396     | 10.0  |             | mainlib |
|      |        | 3   | Acetamide, 2-chloro-N-(3-cyano-4,6-dihydro-4,4,6,6-tetramethylthieno[2,3-c]furan-2-yl)-                                                                             | 376   | 465     | 6.8   |             | mainlib |
|      |        | 4   | 2-(Trimethylsilyl)oxybenzylidene acetophenone                                                                                                                       | 373   | 425     | 6.0   |             | mainlib |
|      |        | 5   | 3-Hydroxy-4,4,6a,8a,11,11,14b-heptamethyl-1,3,4,4a,5,6,6a,7,8,8a,9,10,11,12,12a,14,14a,14b-octadecahydro-2H-picen-13-one                                            | 364   | 384     | 4.4   |             | mainlib |
|      |        | 6   | (E)-1-(2-Hydroxy-4,6-dimethoxyphenyl)-3-phenylprop-2-en-1-one                                                                                                       | 356   | 443     | 3.3   | 1775-97-9   | mainlib |
|      |        | 7   | Malonic acid, 3,3-dimethylbut-2-yl tetradecyl ester                                                                                                                 | 354   | 573     | 3.0   |             | mainlib |
|      |        | 8   | 9- $\alpha$ -Hydroxyarteether                                                                                                                                       | 354   | 444     | 3.0   | 130778-40-4 | mainlib |
|      |        | 9   | 9-Methylcorticosterone                                                                                                                                              | 352   | 408     | 2.8   |             | mainlib |
|      |        | 10  | N-Ethyl-2-phenyl-N-(pyridin-4-ylmethyl)-3-[(trimethylsilyl)oxy]propanamide                                                                                          | 351   | 389     | 2.7   |             | mainlib |

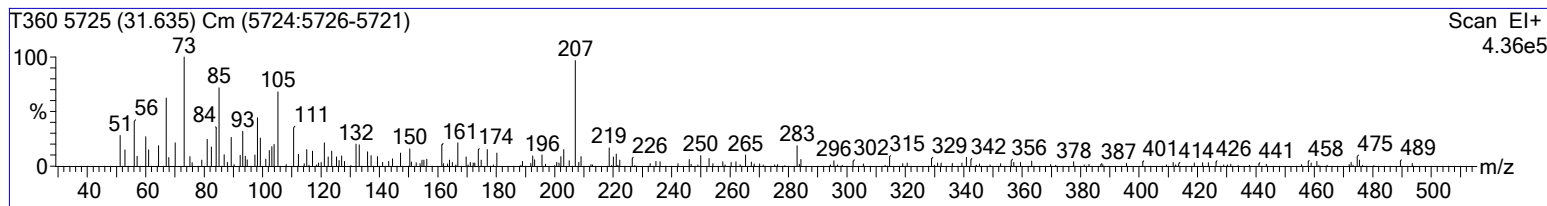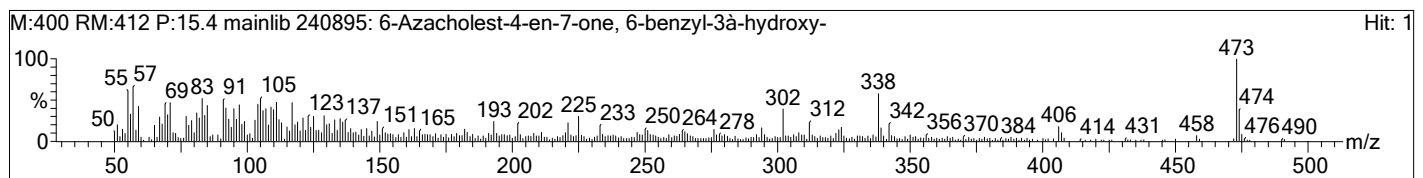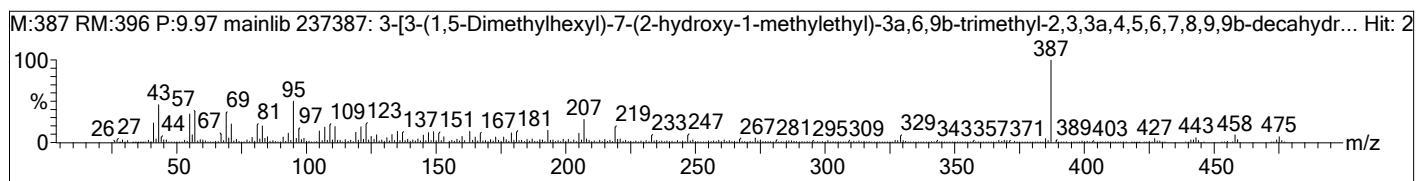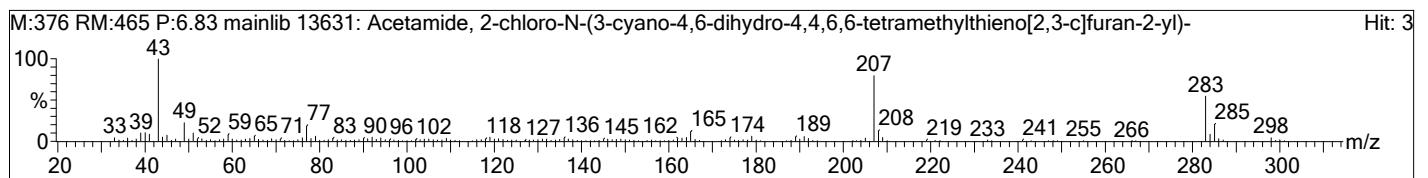

# TAMILNADU AGRICULTURAL UNIVERSITY - AGRICULTURAL MICROBIOLOGY

INSTRUMENT: PERKIN ELMER CLARUS SQ8C  
 INJECTION VOL: 1 MICRO LITER  
 SAMPLE ID : T360

COLOUMN: DB-5 MS CAPILARY STANDARD NON - POLARCOLOUMN  
 DIMENSION: 30Mts, ID: 0.25 mm, FILM: 0.25 IM CARRIER GAS: He

| #  | RT     | Scan | Height    | Area      | Area % | Norm % |
|----|--------|------|-----------|-----------|--------|--------|
| 27 | 31.795 | 5757 | 3,708,181 | 164,586.6 | 0.342  | 4.26   |

| PK # | RT     | Hit | Compound Name                                                    | Match | R.Match | Prob. | CAS         | Library |
|------|--------|-----|------------------------------------------------------------------|-------|---------|-------|-------------|---------|
| 27   | 31.795 | 1   | 2,4-Di-tert-butylthiophenol                                      | 404   | 577     | 9.7   | 19728-43-9  | mainlib |
|      |        | 2   | 5-Bromo-8-(5-nitrosalicylideneamino)quinoline                    | 389   | 503     | 5.9   | 328030-21-3 | mainlib |
|      |        | 3   | 2,4,6-Cycloheptatrien-1-one, 3,5-bis-trimethylsilyl-             | 388   | 543     | 5.7   |             | mainlib |
|      |        | 4   | Phenol, 2,6-dichloro-4-nitro-                                    | 378   | 498     | 4.0   | 618-80-4    | mainlib |
|      |        | 5   | 1,4-Bis(trimethylsilyl)benzene                                   | 370   | 546     | 3.0   | 13183-70-5  | mainlib |
|      |        | 6   | 1-(4-Chlorophenoxy)-1-(1H-imidazol-1-yl)-3,3-dimethylbutan-2-one | 370   | 521     | 3.0   |             | mainlib |
|      |        | 7   | Clocortolone pivalate                                            | 370   | 406     | 3.0   | 34097-16-0  | mainlib |
|      |        | 8   | Octadecanoic acid, 4-hydroxy-, methyl ester                      | 366   | 439     | 2.5   | 2420-38-4   | mainlib |
|      |        | 9   | 1,2-Bis(trimethylsilyl)benzene                                   | 363   | 558     | 2.2   | 17151-09-6  | mainlib |
|      |        | 10  | Octadecane, 3-ethyl-5-(2-ethylbutyl)-                            | 361   | 400     | 2.0   | 55282-12-7  | mainlib |

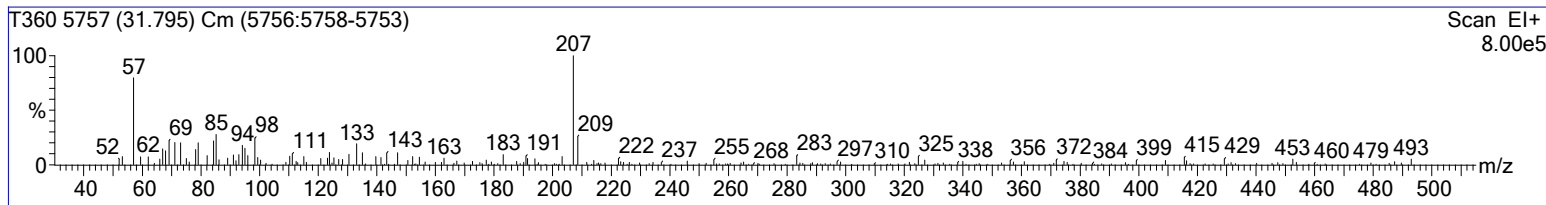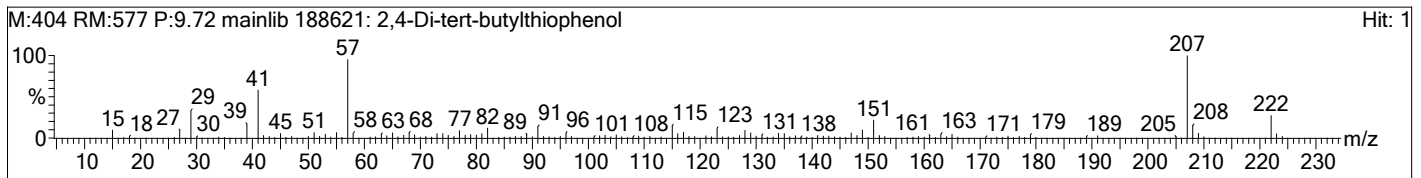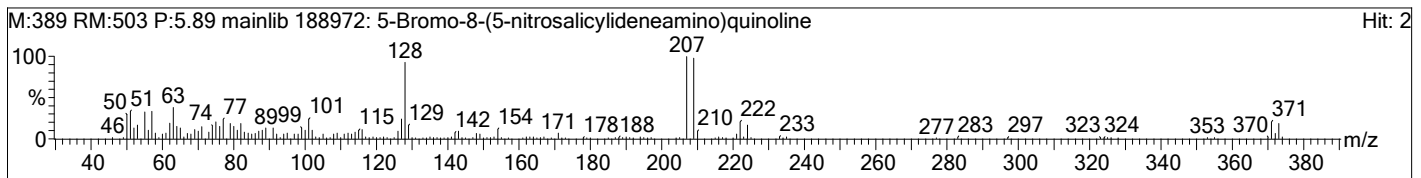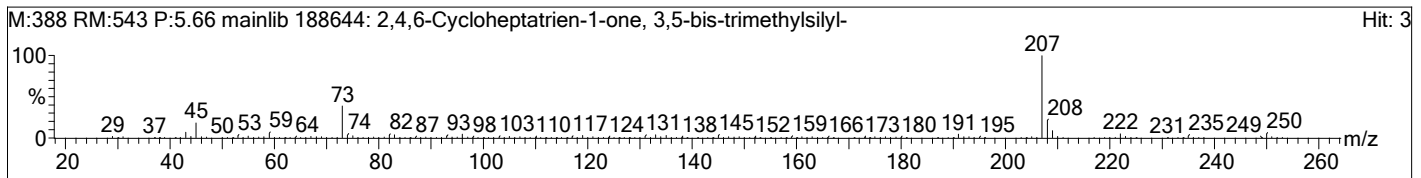

# TAMILNADU AGRICULTURAL UNIVERSITY - AGRICULTURAL MICROBIOLOGY

INSTRUMENT: PERKIN ELMER CLARUS SQ8C  
 INJECTION VOL: 1 MICRO LITER  
 SAMPLE ID : T360

COLOUMN: DB-5 MS CAPILARY STANDARD NON - POLARCOLOUMN  
 DIMENSION: 30Mts, ID: 0.25 mm, FILM: 0.25 IM CARRIER GAS: He

| #  | RT     | Scan | Height    | Area      | Area % | Norm % |
|----|--------|------|-----------|-----------|--------|--------|
| 28 | 33.080 | 6014 | 5,036,046 | 121,006.1 | 0.251  | 3.13   |

| Pk # | RT     | Hit | Compound Name                                      | Match | R.Match | Prob. | CAS         | Library |
|------|--------|-----|----------------------------------------------------|-------|---------|-------|-------------|---------|
| 28   | 33.080 | 1   | Astaxanthin                                        | 432   | 433     | 28.7  | 472-61-7    | mainlib |
|      |        | 2   | 4-Hydroxy-á-ionone                                 | 369   | 526     | 4.8   | 116296-75-4 | mainlib |
|      |        | 3   | 3,4-Dimethoxycinnamic acid                         | 364   | 528     | 3.9   | 2316-26-9   | replib  |
|      |        | 4   | 3,4-Dimethoxycinnamic acid                         | 363   | 569     | 3.9   | 2316-26-9   | mainlib |
|      |        | 5   | 2-Propenoic acid, 3-(3,4-dimethoxyphenyl)-, (E)-   | 363   | 500     | 3.7   | 14737-89-4  | mainlib |
|      |        | 6   | Stearic acid, 3-(octadecyloxy)propyl ester         | 356   | 386     | 2.8   | 17367-40-7  | mainlib |
|      |        | 7   | 2,4-Dimethoxycinnamic acid                         | 355   | 515     | 2.7   | 6972-61-8   | mainlib |
|      |        | 8   | 10,12-Docosadiynedioic acid, 2TMS derivative       | 354   | 407     | 2.6   |             | mainlib |
|      |        | 9   | 3,3'-Methylenebis(1,5,8,11-tetraoxacyclotridecane) | 353   | 595     | 2.5   | 120343-85-3 | mainlib |
|      |        | 10  | 3,4-Dimethoxycinnamic acid                         | 353   | 544     | 3.9   | 2316-26-9   | replib  |

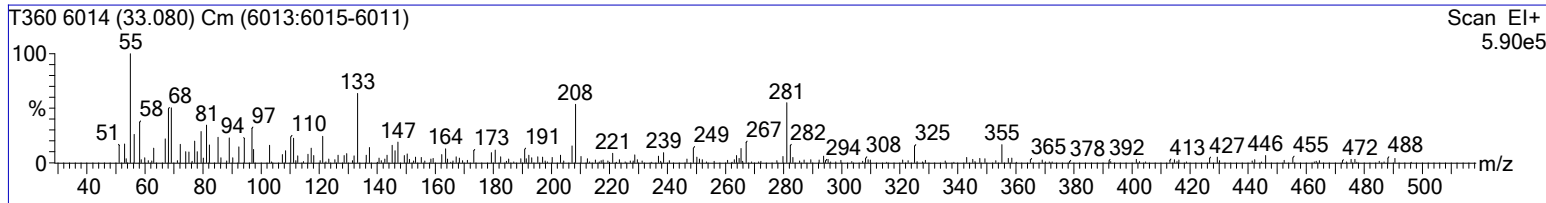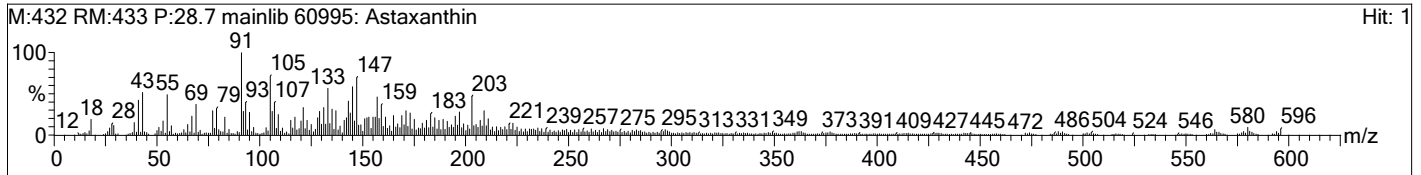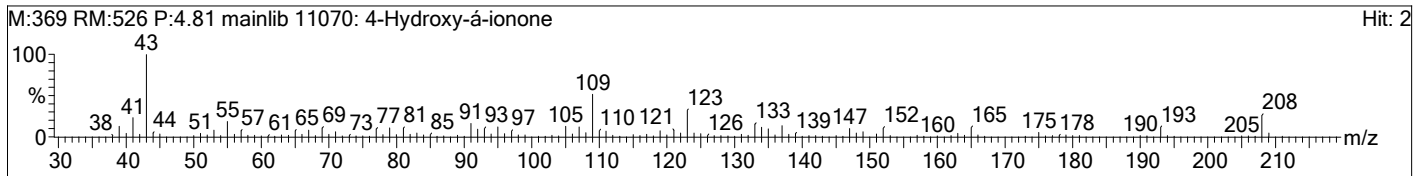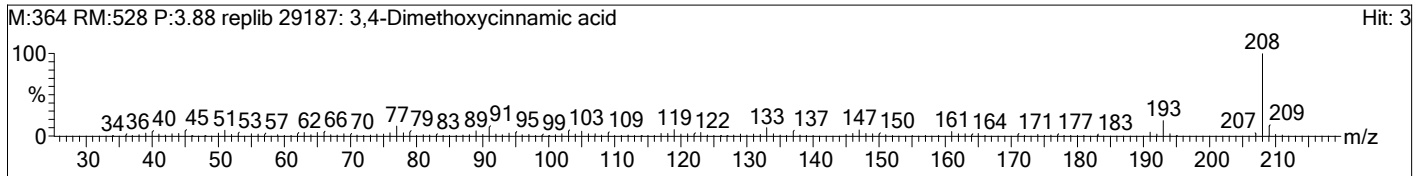

# TAMILNADU AGRICULTURAL UNIVERSITY - AGRICULTURAL MICROBIOLOGY

INSTRUMENT: PERKIN ELMER CLARUS SQ8C  
 INJECTION VOL: 1 MICRO LITER  
 SAMPLE ID : T360

COLOUMN: DB-5 MS CAPILARY STANDARD NON - POLARCOLOUMN  
 DIMENSION: 30Mts, ID: 0.25 mm, FILM: 0.25 IM CARRIER GAS: He

| #  | RT     | Scan | Height    | Area      | Area % | Norm % |
|----|--------|------|-----------|-----------|--------|--------|
| 29 | 33.596 | 6117 | 4,247,245 | 122,363.4 | 0.254  | 3.17   |

| Pk # | RT     | Hit | Compound Name                                                                                                                                    | Match | R.Match | Prob. | CAS         | Library |
|------|--------|-----|--------------------------------------------------------------------------------------------------------------------------------------------------|-------|---------|-------|-------------|---------|
| 29   | 33.596 | 1   | 3,8,12-Tri-O-acetoxy-7-desoxyingol-7-one                                                                                                         | 388   | 419     | 27.1  |             | mainlib |
|      |        | 2   | Propanoic acid, 2-(3-acetoxy-4,4,14-trimethylandro-8-en-17-yl)-                                                                                  | 384   | 407     | 22.9  |             | mainlib |
|      |        | 3   | Corynan-17-ol, 18,19-didehydro-10-methoxy-, acetate (ester)                                                                                      | 356   | 431     | 6.6   | 56053-13-5  | mainlib |
|      |        | 4   | Tibolone, trimethylsilyl ether                                                                                                                   | 347   | 377     | 4.8   |             | mainlib |
|      |        | 5   | Glycine, N-[(3 $\alpha$ ,5 $\alpha$ )-24-oxo-3-[(trimethylsilyloxy)chol-24-yl]-, methyl ester                                                    | 343   | 415     | 4.1   | 57326-15-5  | mainlib |
|      |        | 6   | 5-Ethoxy-2-[4-(2-methoxyphenyl)-1H-pyrazol-3-yl]phenol                                                                                           | 340   | 418     | 3.6   |             | mainlib |
|      |        | 7   | Acridin-1(2H)-one, 3,4-dihydro-9-allylamino-3,3-dimethyl-                                                                                        | 337   | 415     | 3.2   | 300359-68-6 | mainlib |
|      |        | 8   | 18,19-Seco-15 $\alpha$ -yohimban-19-oic acid, 20,21-didehydro-16 $\alpha$ -(hydroxymethyl)-, methyl ester                                        | 331   | 406     | 2.5   | 5552-25-0   | mainlib |
|      |        | 9   | Acetic acid, 17-(1,5-dimethylhexyl)-4,4,10,13,17-pentamethyl-2,3,4,5,6,7,10,11,12,13,16,17-dodecahydro-1H-cyclopenta[a]phenanthrene-3-ol (ester) | 328   | 352     | 2.2   |             | mainlib |
|      |        | 10  | 2-[p-Chlorostyryl]-5,8-dimethoxy-6-nitroquinoline                                                                                                | 324   | 405     | 1.9   |             | mainlib |

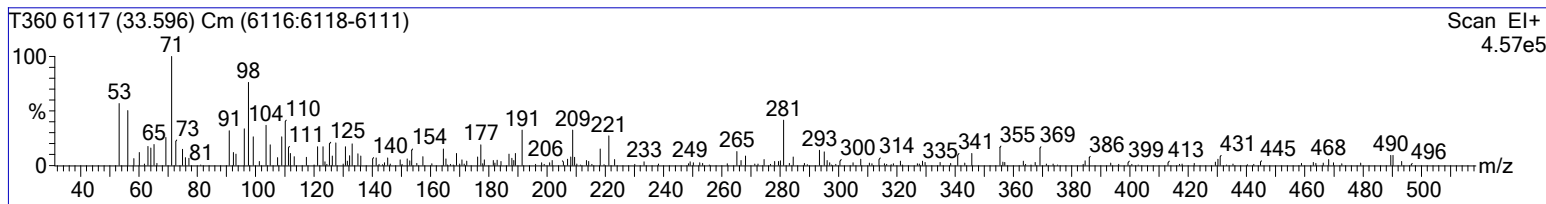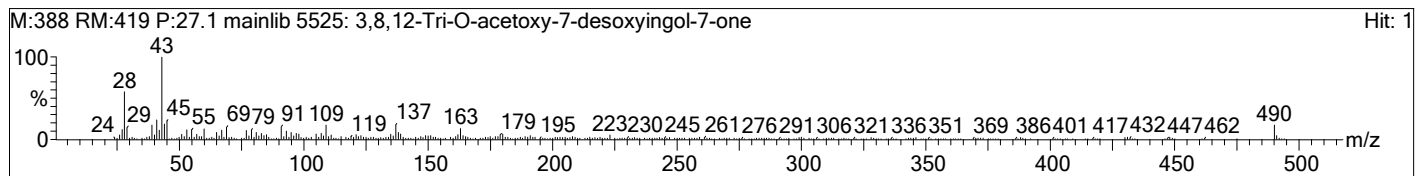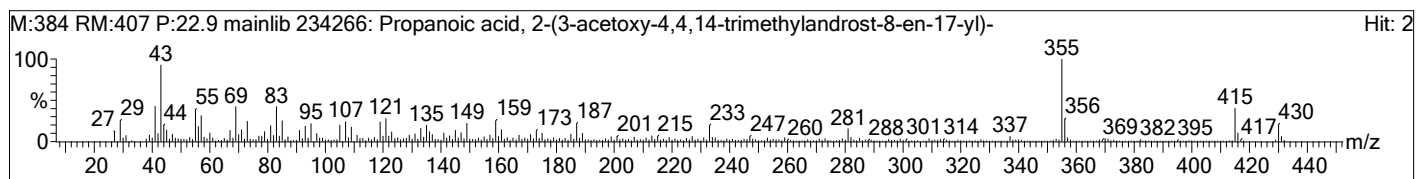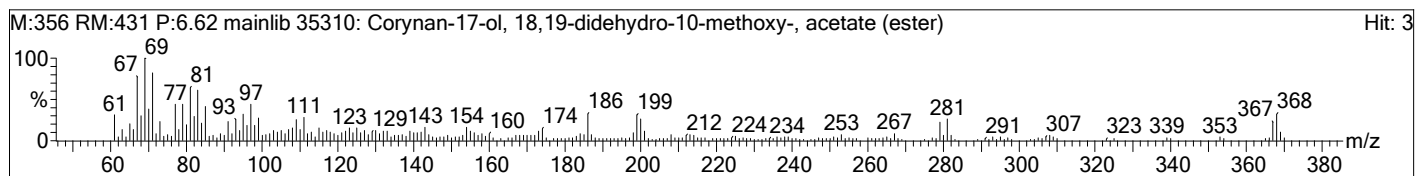

# TAMILNADU AGRICULTURAL UNIVERSITY - AGRICULTURAL MICROBIOLOGY

INSTRUMENT: PERKIN ELMER CLARUS SQ8C  
 INJECTION VOL: 1 MICRO LITER  
 SAMPLE ID : T360

COLOUMN: DB-5 MS CAPILARY STANDARD NON - POLARCOLOUMN  
 DIMENSION: 30Mts, ID: 0.25 mm, FILM: 0.25 IM CARRIER GAS: He

| #  | RT     | Scan | Height    | Area      | Area % | Norm % |
|----|--------|------|-----------|-----------|--------|--------|
| 30 | 34.171 | 6232 | 3,976,397 | 134,905.9 | 0.280  | 3.49   |

| Pk # | RT     | Hit | Compound Name                                                                                                                                  | Match | R.Match | Prob. | CAS        | Library |
|------|--------|-----|------------------------------------------------------------------------------------------------------------------------------------------------|-------|---------|-------|------------|---------|
| 30   | 34.171 | 1   | DISTEARIN                                                                                                                                      | 399   | 435     | 14.1  | 1188-58-5  | mainlib |
|      |        | 2   | Picrotoxin                                                                                                                                     | 377   | 511     | 5.6   | 124-87-8   | mainlib |
|      |        | 3   | 9-Octadecenoic acid (Z)-, 2-hydroxy-3-[(1-oxooctadecyl)oxy]propyl ester                                                                        | 376   | 427     | 5.4   | 18266-27-8 | mainlib |
|      |        | 4   | Octadecanoic acid, 4-hydroxy-, methyl ester                                                                                                    | 375   | 465     | 5.2   | 2420-38-4  | mainlib |
|      |        | 5   | 2(3H)-Furanone, dihydro-5-tetradecyl-                                                                                                          | 371   | 476     | 4.3   | 502-26-1   | mainlib |
|      |        | 6   | 17 $\alpha$ -Acetoxy-1',1'-dicarboethoxy-1 $\alpha$ ,2 $\alpha$ -dihydro-17 $\alpha$ -methyl-3'H-cycloprop[1,2]-5 $\alpha$ -androst-1-en-3-one | 367   | 382     | 3.7   | 80097-22-9 | mainlib |
|      |        | 7   | 1,2-Propanediol, 3-(octadecyloxy)-, diacetate                                                                                                  | 366   | 445     | 3.5   | 21994-81-0 | mainlib |
|      |        | 8   | 2H-3,7-Methanoazacycloundecino[5,4-b]indole-9-carboxylic acid, 5-ethyl-1,4,5,6,7,8,9,10-octahydro-, methyl ester, [5S-(5R*,7R*,9S*)]-          | 363   | 470     | 3.1   | 26251-90-1 | replib  |
|      |        | 9   | 3,5,9-Trioxa-4-phosphaheptacosan-1-aminium, 4-hydroxy-N,N,N-trimethyl-10-oxo-7-[(1-oxooctadecyl)oxy]-, hydroxide, inner salt, 4-oxide, (R)-    | 362   | 377     | 3.0   | 816-94-4   | mainlib |
|      |        | 10  | 25-Norisopropyl-9,19-cyclolanostan-22-en-24-one, 3-acetoxy-24-phenyl-4,4,14-trimethyl-                                                         | 360   | 381     | 2.8   |            | mainlib |

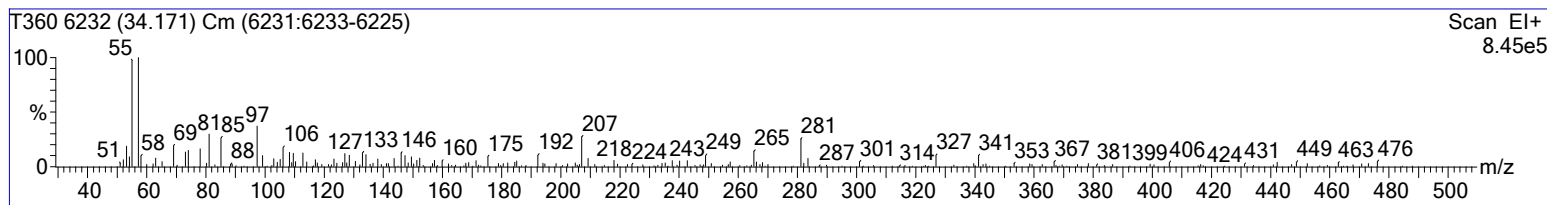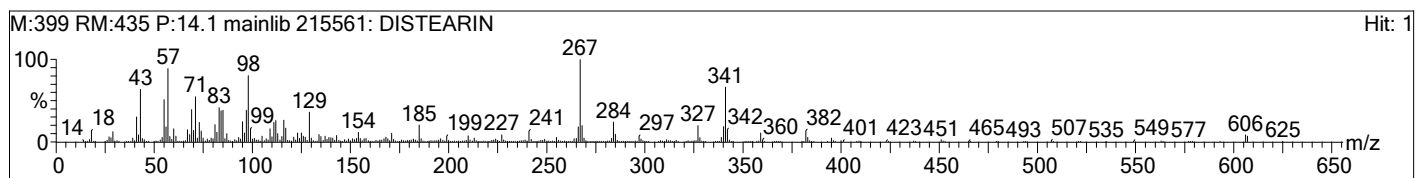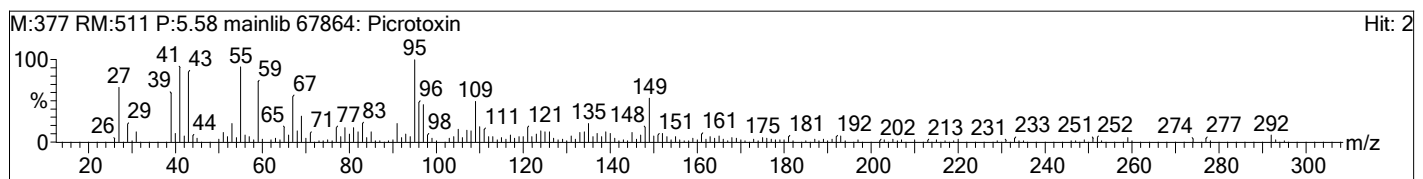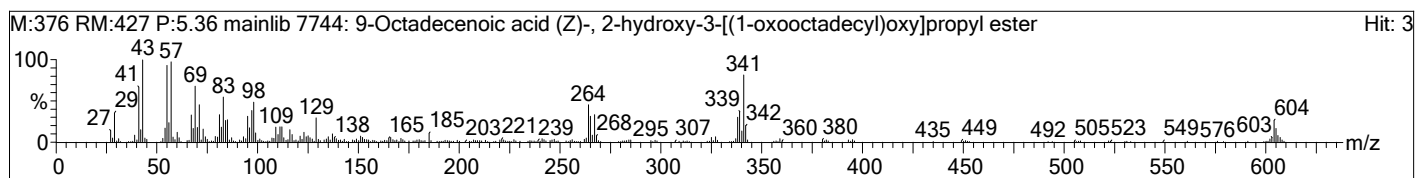

Supplement: pone.0219014.s011.pdf [file pone.0219014.s011.pdf]
