# Supplementary material for: Enhancement of disease resistance, growth potential, and photosynthesis in tomato (Solanum lycopersicum) by inoculation with an endophytic actinobacterium, Streptomyces thermocarboxydus strain BPSAC147
Source: PubMed Central journal article supplement (PMC6608948; doi:10.1371/journal.pone.0219014), 2019-07-03
Supplement: pone.0219014.s005.pdf [file pone.0219014.s005.pdf]

**S5 Table. Detection of Volatile Compounds in tomato leaf methanolic extracts in different treatments**

| Sl. No              | RT     | Compound Name                        | Molecular Structure                                                                   | MW  | Area% | Activity                                       |
|---------------------|--------|--------------------------------------|---------------------------------------------------------------------------------------|-----|-------|------------------------------------------------|
| <b>Treatment T0</b> |        |                                      |                                                                                       |     |       |                                                |
| 1                   | 7.905  | Benzene, 1,3-bis(1,1-dimethylethyl)- |    | 190 | 0.665 | -                                              |
| 2                   | 11.227 | 1-Dodecanol                          |    | 186 | 1.894 | -                                              |
| 3                   | 11.867 | 2,4-Di-tert-butylphenol              |    | 206 | 0.498 | Antioxidant and Antifungal Properties [64, 65] |
| 4                   | 15.804 | Dodecyl acrylate                     |   | 240 | 5.473 | -                                              |
| 5                   | 15.964 | Hexadecane, 1,1-bis(dodecyloxy)-     |  | 594 | 0.548 | -                                              |
| 6                   | 20.555 | Hexadecanoic acid, methyl ester      |  | 270 | 1.083 | -                                              |

|    |        |                                                                                                        |                                                                                       |     | Cytotoxic activity |      |
|----|--------|--------------------------------------------------------------------------------------------------------|---------------------------------------------------------------------------------------|-----|--------------------|------|
| 7  | 21.051 | Diethyl phthalate                                                                                      | 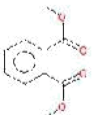   | 222 | 0.33               | [66] |
| 8  | 21.196 | Dasycarpidan-1-methanol, acetate<br>(ester)                                                            |    | 326 | 0.316              | -    |
| 9  | 21.326 | 6-Hydroxy-powelline-N-nitroso-7-demethoxy-,aldehyde                                                    |    | 316 | 0.327              | -    |
| 10 | 21.821 | 6-Amino-5-cyano-4-(5-cyano-2,4-dimethyl-1Hpyrrol-3-yl)-2-methyl-4H-pyran-3-carboxylic acid ethyl ester |    | 326 | 0.35               | -    |
| 11 | 24.332 | Heptadecanoic acid, 16-methyl-, methyl ester                                                           |    | 298 | 0.955              | -    |
| 12 | 29.834 | Benzoic acid, 4-methyl-2-trimethylsilyloxy-,trimethylsilyl ester                                       |  | 136 | 0.413              | -    |

|    |        |                                                                                                                                                |                                                                                       |     |       |   |
|----|--------|------------------------------------------------------------------------------------------------------------------------------------------------|---------------------------------------------------------------------------------------|-----|-------|---|
| 13 | 30.539 | Hexa-t-butylselenatrisiletane                                                                                                                  | 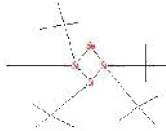   | 506 | 0.385 | - |
| 14 | 33.366 | á-D-Glucopyranosiduronic acid, 3-(5-ethylhexahydro-2,4,6-trioxo-5-pyrimidinyl)-1,1-dimethylpropyl 2,3,4-tris-O-(trimethylsilyl)-, methyl ester |    | 430 | 0.754 | - |
| 15 | 33.451 | 17-(1,5-Dimethylhexyl)-10,13-dimethyl-3-styryl hexa deca hydro cyclopenta [a] phenanthren-2-one                                                |     | 394 | 0.678 | - |
| 16 | 33.486 | Bicyclo[5.3.0]decan-2-one, 9-(diphenyl methylene)-                                                                                             |   | 312 | 0.678 | - |
| 17 | 33.541 | 4-[4-(2-Methoxyphenyl)-1H-pyrazol-3-yl]benzene-1,3-diol                                                                                        |  | 282 | 1.161 | - |

|    |        |                                                                                                                                                                                             |                                                                                       |     |       |   |
|----|--------|---------------------------------------------------------------------------------------------------------------------------------------------------------------------------------------------|---------------------------------------------------------------------------------------|-----|-------|---|
| 18 | 33.606 | Methyl 9,11,13-octadecatrienoate,<br>adduct with 1-methyl-1,3,4-triazolin-<br>2,5-dione                                                                                                     |    | 405 | 1.19  | - |
| 19 | 33.686 | 9,19-Cyclolanostan-3-ol, 24,24-<br>epoxymethano-,acetate                                                                                                                                    |    | 484 | 0.564 | - |
| 20 | 33.721 | Acetic acid, 17-(4-hydroxy-5-<br>methoxy-1,5-dimethylhexyl)-<br>4,4,10,13,14-penta methyl-2,3,4,5,6,7,<br>10,11,12,13, 14, 15, 16,17-tetradeca<br>hydro cyclopenta [a] phenanthryl<br>ester |    | 516 | 1.185 | - |
| 21 | 33.776 | Glycidyl oleate                                                                                                                                                                             |   | 338 | 0.413 | - |
| 22 | 33.801 | Phenanthrene, 9-<br>dodecyltetradecahydro-                                                                                                                                                  |  | 346 | 0.315 | - |

|        |                                                                                                                       |                                                                                     |     |       |   |
|--------|-----------------------------------------------------------------------------------------------------------------------|-------------------------------------------------------------------------------------|-----|-------|---|
| 23     | 4-Acetyloxyimino-6,6-dimethyl-3-methylsulfanyl-4,5,6,7-tetrahydrobenzo[c]thiophene-1-carboxylic acid methyl ester     | 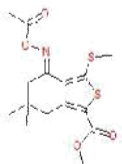 | 341 | 0.381 | - |
| 24     | 9,12-Octadecadienoic acid, 2-phenyl-1,3-dioxan-5-yl ester, cis-                                                       |   | 382 | 0.416 | - |
| 25     | 3-Desoxo-3,16-dihydroxy-12-desoxyphorbol 3,13,16,20-tetraacetate                                                      |  | 534 | 0.314 | - |
| 26     | 1H-Cyclopropa[3,4]benz[1,2-e]azulene-3-carboxaldehyde, 9a-(acetyloxy)-1a,1b,                                          |  |     |       | - |
| 33.911 | 4,4a,5,7a,7b,8,9,9a-decahydro-4a,7b-dihydroxy-1,1,6,8-tetramethyl-5,9-dioxo-, [1aR-(1aà,1bá, 4aá,7aà, 7bà,8à, 9aà)] - |                                                                                     | 504 | 0.597 |   |

|                     |        |                                                     |                                                                                      |     |       |   |
|---------------------|--------|-----------------------------------------------------|--------------------------------------------------------------------------------------|-----|-------|---|
| 27                  | 33.981 | Spirost-8-en-11-one, 3-hydroxy-,<br>(3á,5à,14á,20á, | 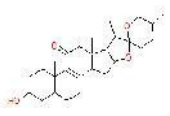  | 428 | 0.34  | - |
| 28                  | 34.126 | 3,8,12-Tri-O-acetoxy-7-desoxyingol-<br>7-one        |   | 490 | 0.33  | - |
| <b>Treatment T1</b> |        |                                                     |                                                                                      |     |       |   |
| 1                   | 5.549  | Benzaldehyde, 4-methyl-                             |   | 120 | 0.643 | - |
| 2                   | 7.92   | Benzene, 1,3-bis(1,1-dimethylethyl)-                |   | 190 | 0.65  | - |
| 3                   | 11.247 | 1-Dodecanol                                         |    | 186 | 2.087 | - |
| 4                   | 15.828 | Dodecyl acrylate                                    |   | 240 | 6.905 | - |
| 5                   | 15.978 | E-10-Dodecen-1-ol propionate                        |  | 240 | 0.741 | - |
| 6                   | 20.57  | Pentadecanoic acid, 14-methyl-,<br>methyl ester     |  | 270 | 0.519 | - |
| 7                   | 24.352 | Methyl tetradecanoate                               |  | 242 | 0.703 | - |

|    |        |                                                                                                                                 |                                                                                       |      |       |   |
|----|--------|---------------------------------------------------------------------------------------------------------------------------------|---------------------------------------------------------------------------------------|------|-------|---|
| 8  | 30.019 | 5,7,9(11)-Androstatriene, 3-hydroxy-<br>17-oxo-                                                                                 | 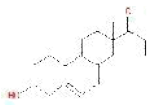   | 284  | 0.944 | - |
| 9  | 30.149 | Benzo[h]quinoline, 2,4-dimethyl-                                                                                                |    | 207  | 0.88  | - |
| 10 | 30.194 | 1,4,7-Androstatrien-3,17-dione                                                                                                  |    | 282  | 1.359 | - |
| 11 | 30.304 | Docosanoic acid, 1,2,3-propanetriyl<br>ester                                                                                    |    | 1058 | 0.738 | - |
| 12 | 30.364 | .psi.,psi.-Carotene, 1,1',2,2'-<br>tetrahydro-1,1'-dimethoxy-                                                                   |     | 716  | 0.591 | - |
| 13 | 30.434 | Estriol 16à-(à-D-glucuronide)                                                                                                   |   | 414  | 1.394 | - |
| 14 | 30.554 | 7aH-Cyclopenta[a] cyclopropa [f]<br>cyclo undecene-2,4,7,7a,10,11-hexol,<br>1,1a, 2, 3,<br>4,4a,5,6,7,10,11,11adodecahydro-1,1, |  | 580  | 1.964 | - |

|    |        |                                                                                                                                                        |                                                                                       |     |       |                                        |
|----|--------|--------------------------------------------------------------------------------------------------------------------------------------------------------|---------------------------------------------------------------------------------------|-----|-------|----------------------------------------|
|    |        | 3,6,9-pentamethyl-, 2,4,7,10,11-penta<br>acetate                                                                                                       |                                                                                       |     |       |                                        |
| 15 | 30.579 | 7,8-Epoxy lanostan-11-ol, 3-acetoxy-                                                                                                                   | 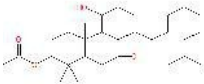   | 502 | 0.933 | -                                      |
| 16 | 30.634 | Clonazepam                                                                                                                                             |    | 315 | 0.67  | Antioxidant and<br>Anticonvulsant [67] |
| 17 | 30.699 | 17 $\alpha$ -Acetoxy-1',1'-dicarboethoxy-<br>1 $\alpha$ ,2 $\alpha$ -dihydro-17 $\alpha$ -methyl-3'H-<br>cycloprop[1,2]-5 $\alpha$ -androst-1-en-3-one |    | 502 | 1.075 | -                                      |
| 18 | 30.759 | 9,19-Cyclolanostan-3-ol, 24,24-<br>epoxymethano-,acetate                                                                                               |    | 484 | 0.964 | -                                      |
| 19 | 30.919 | 3-Isopropyl-6a,10b-dimethyl-8 - (2-<br>oxo-2-phenyl ethyl)-dodecahydro-<br>benzo [f]chromen-7-one                                                      |    | 396 | 0.554 | -                                      |
| 20 | 31.009 | 17-(1,5-Dimethylhexyl)-10,13-<br>dimethyl-3-styryl hexadecahydro<br>cyclopenta [a] phenanthren-2-one                                                   |  | 384 | 0.433 | -                                      |



|    |        |                                                                                                           |                                                                                       |     |       |                     |
|----|--------|-----------------------------------------------------------------------------------------------------------|---------------------------------------------------------------------------------------|-----|-------|---------------------|
| 21 | 31.069 | (+)-Prostaglandin F2 $\alpha$ , 4TMS derivative                                                           | 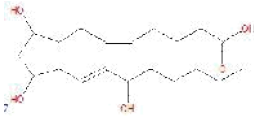    | 354 | 0.524 | -                   |
| 22 | 31.124 | Strychane, 1-acetyl-20 $\alpha$ -hydroxy-16-methylene-                                                    |    | 338 | 0.974 | -                   |
| 23 | 31.53  | Pregn-5-ene-3,11-dione, 17, 20:20,21-bis [methylene bis (oxy)]-, cyclic 3-(1,2-ethane diyl acetal)        |    | 446 | 0.439 | -                   |
| 24 | 32.625 | Phosphorothioic acid, O-(4,5-dichloro-2-methoxyphenyl) O,O-dimethyl ester                                 |    | 272 | 0.559 | -                   |
| 25 | 32.735 | 1,8-Dioxa-5-thiaoctane, 8-(9-bora bicycle [3.3.1]non-9-yl)-3-(9-bora bicyclo[3.3.1]non-9-yloxy)-1-phenyl- |    | 468 | 0.603 | -                   |
| 26 | 32.835 | 5,5,6-Exo-8,9,10-hexachlorocamphene                                                                       |  | 340 | 0.939 | -                   |
| 27 | 32.945 | Rhodopin                                                                                                  |   | 554 | 0.724 | Pesticide and heavy |

metal tolerance [68]

28 10-Acetoxy-2-hydroxy-1,2,6a,6b,  
9,9,12 ahepta methyl-1,3,4,5,6,6a,6b,  
33.035 7,8,8a, 9, 10,11,12, 12a, 12b,13,14b-  
octadeca hydro -2H-picene-  
4acarboxylic acid, methyl ester

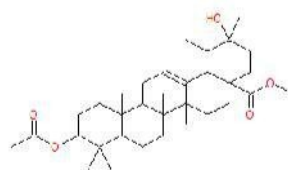

528 1.236

29 33.18 7,8-Epoxy lanostan-11-ol, 3-acetoxy

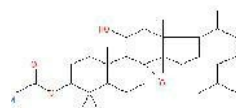

502 0.475

30 33.31 l-Methionine, N-(5-chlorovaleryl)-,  
methyl ester

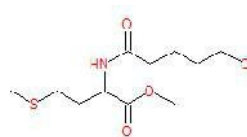

281 0.485

**Treatment T2**

1 11.247 1-Undecanol

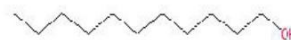

172 1.268

2 15.818 Dodecyl acrylate

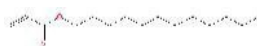

240 3.139

3 20.575 Hexadecanoic acid, methyl ester

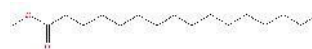

270 0.796

|   |        |                                                                                                                                                            |                                                                                      |     |       |                                 |
|---|--------|------------------------------------------------------------------------------------------------------------------------------------------------------------|--------------------------------------------------------------------------------------|-----|-------|---------------------------------|
| 4 | 24.257 | Ethyl iso-allocholate                                                                                                                                      | 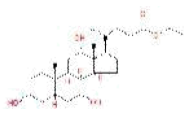  | 436 | 0.623 | -                               |
| 5 | 24.347 | Methyl stearate                                                                                                                                            |    | 298 | 1.648 | Anti-inflammatory activity [69] |
| 6 | 29.419 | Eicosapentaenoic Acid, TBDMS derivative                                                                                                                    |   | 416 | 0.817 | Anticancer activity [70]        |
| 7 | 29.639 | Strychane, 1-acetyl-20-hydroxy-16-methylene-                                                                                                               |   | 338 | 0.598 | -                               |
| 8 | 29.689 | Oleic acid, 3-(octadecyloxy)propyl ester                                                                                                                   |    | 592 | 0.675 | -                               |
| 9 | 29.764 | 7aH-Cyclopenta[a]cyclopropa[f] cycloundecene-2,4,7,7a,10,11-hexol,1,1a,2,3,4,4a,5,6,7,10,11,11a-decahydro-1,1,3,6,9-pentamethyl-, 2,4,7,10,11-pentaacetate |  | 580 | 1.06  | -                               |

|    |        |                                                                                                                                   |                                                                                       |     |       |   |
|----|--------|-----------------------------------------------------------------------------------------------------------------------------------|---------------------------------------------------------------------------------------|-----|-------|---|
| 10 | 29.884 | 1-(2-Acetoxyethyl)-3,6-diazahomoadamantan-9-one oxime                                                                             |    | 252 | 1.23  | - |
| 11 |        | 2,4,6-Decatrienoic acid, 1a,2,5,5a,6,9,10,10a octahydro-5,5a-dihydroxy-4-(hydroxyl methyl)-                                       |    |     |       | - |
|    | 30.034 | 1,7,9-trimethyl-1-[[[(2-methyl-1-oxo-2-butenyl) oxy]methyl]-11-oxo-1H-2,8amethanocyclopenta[a]cyclopropa [e]cyclodecen-6-yl ester |                                                                                       | 594 | 3.161 |   |
| 12 | 30.149 | Tris(2-butoxyethyl) phosphate                                                                                                     |    | 398 | 0.675 | - |
| 13 |        | 10-Acetoxy-2-hydroxy-1,2,6a, 6b, 9, 9,12 aheptamethyl-1,3, 4,5,6,6a,6b,                                                           |  |     |       | - |
|    | 30.204 | 7,8,8a,9,10,11,12,12a,12b,13,14b-octadecahydro-2H-picene-4a carboxylic acid, methyl ester                                         |                                                                                       | 528 | 0.694 |   |

|    |        |                                                                                                  |                                                                                       |      |       |   |
|----|--------|--------------------------------------------------------------------------------------------------|---------------------------------------------------------------------------------------|------|-------|---|
| 14 | 30.534 | Oleic acid, eicosyl ester                                                                        |     | 562  | 1.258 | - |
| 15 | 30.634 | Docosahexaenoic acid, 1,2,3-propanetriyl ester                                                   |    | 1022 | 0.672 | - |
| 16 | 30.749 | 3-Isopropyl-6a,7,10b-trimethyl-dodecahydrobenzo[f]chromene-7,8-dicarboxylic acid, dimethyl ester |    | 454  | 0.669 | - |
| 17 | 30.874 | Octadecane, 1,1'-[1,3-propanediylbis(oxy)]bis-                                                   |     | 580  | 1.217 | - |
| 18 | 30.904 | 17-Pentatriacontene                                                                              |     | 490  | 0.623 | - |
| 19 | 31.054 | 2-Nonadecanone 2,4-dinitrophenylhydrazine                                                        |     | 462  | 1.07  | - |
| 20 | 31.149 | N,N'-Trimethylenebis[s-3-aminopropylthiosulfuric acid]                                           |   | 382  | 1.251 | - |
| 21 | 31.174 | 9,12,15-Octadecatrienoic acid, 2-phenyl-1,3-dioxan-5-yl ester                                    |  | 264  | 1.053 | - |

|    |        |                                                                    |                                                                                       |     |       |                                 |
|----|--------|--------------------------------------------------------------------|---------------------------------------------------------------------------------------|-----|-------|---------------------------------|
| 22 | 31.33  | 9-Desoxo-9-x-acetoxy-3,8,12-tri-O-acetylingol                      | 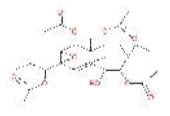   | 536 | 0.836 | -                               |
| 23 | 31.79  | Propanoic acid, 2-(3-acetoxy-4,4,14-trimethylandrosta-8-en-17-yl)- |    | 430 | 0.726 | -                               |
| 24 | 32.685 | 10,13-Octadecadiynoic acid, methyl ester                           |     | 290 | 0.808 | -                               |
| 25 | 32.78  | Cholestan-3-ol, 5-chloro-6-nitro-, (3a,5a,6a) -                    |    | 467 | 1.64  | -                               |
| 26 | 32.845 | Testolactone                                                       |    | 300 | 1.041 | -                               |
| 27 | 34.456 | Ethyl iso-allocholate                                              |    | 436 | 0.735 | Anti-inflammatory activity [71] |
| 28 | 34.526 | Strychane, 1-acetyl-20-hydroxy-16-methylene-                       |  | 338 | 0.708 | -                               |
| 29 | 34.636 | 9-Fluoro-17-methyl-5-Androstan-3a,11a,17a -triol                   |  | 336 | 0.68  | -                               |

---

**Treatment T3**

|   |       |                                                                    |                                                                                       |     |       |   |
|---|-------|--------------------------------------------------------------------|---------------------------------------------------------------------------------------|-----|-------|---|
| 1 | 3.063 | 2-Myristinoyl pantetheine                                          | 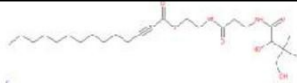    | 484 | 0.345 | - |
| 2 | 3.469 | Furane-3,4(2H,5H)-dione, 2,2-dimethyl-5-spirocyclohexane-, dioxime |    | 226 | 0.463 | - |
| 3 | 3.984 | Glafenin                                                           |    | 152 | 0.296 | - |
| 4 | 4.224 | 13,14-Epoxyursan-3-ol, acetate                                     |    | 472 | 0.404 | - |
| 5 | 4.409 | 1,4-Pentanediamine                                                 |   | 102 | 0.263 | - |
| 6 | 5.559 | Benzaldehyde, 4-methyl-                                            |  | 120 | 0.94  | - |
| 7 | 7.915 | Benzene, 1,3-bis(1,1-dimethylethyl)-                               |  | 190 | 0.719 | - |

|    |        |                                                         |                                                                                       |     |       |                                   |
|----|--------|---------------------------------------------------------|---------------------------------------------------------------------------------------|-----|-------|-----------------------------------|
| 8  | 11.257 | Cyclotetradecane                                        |    | 196 | 2.574 | -                                 |
| 9  | 11.897 | 2,4-Di-tert-butylphenol                                 |    | 206 | 0.494 | Antioxidant<br>Properties<br>[64] |
| 10 | 13.698 | D-Mannitol, 1,2:3,4:5,6-tris-O-(1-methylethylidene)-    |    | 302 | 0.349 | -                                 |
| 11 | 15.828 | Dodecyl acrylate                                        |    | 240 | 8.013 | -                                 |
| 12 | 15.984 | 3-Propionyloxypentadecane                               |    | 284 | 0.612 | -                                 |
| 13 | 20.58  | Hexadecanoic acid, methyl ester                         |    | 270 | 0.988 | -                                 |
| 14 | 21.601 | 2-Nonadecanone 2,4-dinitrophenylhydrazine               |   | 462 | 0.239 | -                                 |
| 15 | 24.012 | 9-Octadecene, 1,1'-[1,2-ethanediylbis(oxy)]bis-, (Z,Z)- |  | 562 | 0.254 | -                                 |
| 16 | 24.347 | Heptadecanoic acid, 16-methyl-, methyl ester            |  | 298 | 1.124 | -                                 |



|    |        |                                                                                       |                                                                                       |     |       |   |
|----|--------|---------------------------------------------------------------------------------------|---------------------------------------------------------------------------------------|-----|-------|---|
| 17 | 27.958 | (4,4-Diphenyl-butyl)-(3-phenyl-piperidin-4-yl)-amine                                  |    | 384 | 0.265 | - |
| 18 | 28.553 | Octadecane, 1-chloro-                                                                 |     | 288 | 0.265 | - |
| 19 | 29.854 | 17-Pentatriacontene                                                                   |     | 490 | 0.351 | - |
| 20 | 30.064 | 3-Isopropyl-6a,10b-dimethyl-8-(2-oxo-2-phenylethyl)-dodecahydrobenzo[f] chromen-7-one |    | 396 | 0.298 | - |
| 21 | 30.699 | 2-Chloroadenosine                                                                     |    | 301 | 0.386 | - |
| 22 | 31.155 | 7,8-Epoxy lanostan-11-ol, 3-acetoxy-                                                  |    | 502 | 0.323 | - |
| 23 | 31.59  | Glafenin                                                                              |  | 152 | 0.244 | - |
| 24 | 31.635 | 6-Azacholest-4-en-7-one, 6-benzyl-3-à-hydroxy                                         |  | 491 | 0.295 | - |

|    |        |                                          |                                                                                     |     |       |                      |
|----|--------|------------------------------------------|-------------------------------------------------------------------------------------|-----|-------|----------------------|
| 25 | 31.795 | 2,4-Di-tert-butylthiophenol              |  | 196 | 0.342 | -                    |
| 26 | 33.08  | Astaxanthin                              |  | 596 | 0.251 | Inflammation<br>[72] |
| 27 | 33.596 | 3,8,12-Tri-O-acetoxy-7-desoxyingol-7-one |  | 490 | 0.254 | -                    |
| 28 | 34.171 | Distearin                                |  | 624 | 0.28  | -                    |

---
